# Supplementary material
Source: publisher site journal article supplement (https://www.dovepress.com/article/supplementary_file/569174/569174_Supplemental%20Table%20S1-11.xlsx)
Supplement: Supplementary file 1 [file 569174_Supplemental%20Table%20S1-11.xlsx]

## Sheet: Table S1
The exhaustive list of these 1,400 metabolites
study_id	reported_trait	initial_sample_size	replication_sample_size	gxe	gxg	snp_count	qualifier	imputed	pooled	study_design_comment	full_pvalue_set	user_requested
GCST90199621	Carnitine levels	8,192 European ancestry individuals	NA	FALSE	FALSE	15427953	NA	TRUE	FALSE	NA	TRUE	NA
GCST90199622	Benzoate levels	7,306 European ancestry individuals	NA	FALSE	FALSE	15395310	NA	TRUE	FALSE	NA	TRUE	NA
GCST90199623	Maltotriose levels	4,641 European ancestry individuals	NA	FALSE	FALSE	15449343	NA	TRUE	FALSE	NA	TRUE	NA
GCST90199624	Hippurate levels	8,260 European ancestry individuals	NA	FALSE	FALSE	15429755	NA	TRUE	FALSE	NA	TRUE	NA
GCST90199625	Methionine sulfoxide levels	8,243 European ancestry individuals	NA	FALSE	FALSE	15430510	NA	TRUE	FALSE	NA	TRUE	NA
GCST90199626	Xanthurenate levels	7,965 European ancestry individuals	NA	FALSE	FALSE	15420239	NA	TRUE	FALSE	NA	TRUE	NA
GCST90199627	N-alpha-acetylornithine levels	5,606 European ancestry individuals	NA	FALSE	FALSE	15291122	NA	TRUE	FALSE	NA	TRUE	NA
GCST90199628	3-methylhistidine levels	8,289 European ancestry individuals	NA	FALSE	FALSE	15431449	NA	TRUE	FALSE	NA	TRUE	NA
GCST90199629	Glycerophosphorylcholine (GPC) levels	8,212 European ancestry individuals	NA	FALSE	FALSE	15430145	NA	TRUE	FALSE	NA	TRUE	NA
GCST90199630	Phenylacetate levels	7,059 European ancestry individuals	NA	FALSE	FALSE	15380443	NA	TRUE	FALSE	NA	TRUE	NA
GCST90199631	3-methyl-2-oxovalerate levels	8,257 European ancestry individuals	NA	FALSE	FALSE	15431455	NA	TRUE	FALSE	NA	TRUE	NA
GCST90199632	Tartarate levels	7,099 European ancestry individuals	NA	FALSE	FALSE	15375807	NA	TRUE	FALSE	NA	TRUE	NA
GCST90199633	Suberate (C8-DC) levels	6,902 European ancestry individuals	NA	FALSE	FALSE	15376900	NA	TRUE	FALSE	NA	TRUE	NA
GCST90199634	5-hydroxylysine levels	8,128 European ancestry individuals	NA	FALSE	FALSE	15426861	NA	TRUE	FALSE	NA	TRUE	NA
GCST90199635	3-phenylpropionate hydrocinnamate levels	7,925 European ancestry individuals	NA	FALSE	FALSE	15416781	NA	TRUE	FALSE	NA	TRUE	NA
GCST90199636	Kynurenine levels	8,244 European ancestry individuals	NA	FALSE	FALSE	15430076	NA	TRUE	FALSE	NA	TRUE	NA
GCST90199637	N-acetylglutamate levels	7,802 European ancestry individuals	NA	FALSE	FALSE	15414233	NA	TRUE	FALSE	NA	TRUE	NA
GCST90199638	Glycerol 3-phosphate levels	8,201 European ancestry individuals	NA	FALSE	FALSE	15427890	NA	TRUE	FALSE	NA	TRUE	NA
GCST90199639	Imidazole lactate levels	8,256 European ancestry individuals	NA	FALSE	FALSE	15429719	NA	TRUE	FALSE	NA	TRUE	NA
GCST90199640	4-guanidinobutanoate levels	8,144 European ancestry individuals	NA	FALSE	FALSE	15428161	NA	TRUE	FALSE	NA	TRUE	NA
GCST90199641	Glucuronate levels	7,988 European ancestry individuals	NA	FALSE	FALSE	15421888	NA	TRUE	FALSE	NA	TRUE	NA
GCST90199642	Ribitol levels	8,128 European ancestry individuals	NA	FALSE	FALSE	15426294	NA	TRUE	FALSE	NA	TRUE	NA
GCST90199643	Glycodeoxycholate levels	6,877 European ancestry individuals	NA	FALSE	FALSE	15372558	NA	TRUE	FALSE	NA	TRUE	NA
GCST90199644	Theobromine levels	8,137 European ancestry individuals	NA	FALSE	FALSE	15426624	NA	TRUE	FALSE	NA	TRUE	NA
GCST90199645	Quinate levels	8,200 European ancestry individuals	NA	FALSE	FALSE	15429107	NA	TRUE	FALSE	NA	TRUE	NA
GCST90199646	Gentisate levels	8,013 European ancestry individuals	NA	FALSE	FALSE	15420848	NA	TRUE	FALSE	NA	TRUE	NA
GCST90199647	Theophylline levels	7,822 European ancestry individuals	NA	FALSE	FALSE	15416920	NA	TRUE	FALSE	NA	TRUE	NA
GCST90199648	1,5-anhydroglucitol (1,5-ag) levels	8,139 European ancestry individuals	NA	FALSE	FALSE	15427754	NA	TRUE	FALSE	NA	TRUE	NA
GCST90199649	1-stearoyl-2-arachidonoyl-GPI (18:0/20:4) levels	8,134 European ancestry individuals	NA	FALSE	FALSE	15425017	NA	TRUE	FALSE	NA	TRUE	NA
GCST90199650	Indolelactate levels	8,233 European ancestry individuals	NA	FALSE	FALSE	15429068	NA	TRUE	FALSE	NA	TRUE	NA
GCST90199651	Docosahexaenoate DHA; 22:6n3 levels	8,279 European ancestry individuals	NA	FALSE	FALSE	15431754	NA	TRUE	FALSE	NA	TRUE	NA
GCST90199652	1-stearoyl-2-oleoyl-GPS (18:0/18:1) levels	8,055 European ancestry individuals	NA	FALSE	FALSE	15422153	NA	TRUE	FALSE	NA	TRUE	NA
GCST90199653	1-myristoyl-2-palmitoyl-gpc (14:0/16:0) levels	8,271 European ancestry individuals	NA	FALSE	FALSE	15431251	NA	TRUE	FALSE	NA	TRUE	NA
GCST90199654	Paraxanthine levels in elite athletes	7,840 European ancestry individuals	NA	FALSE	FALSE	15417811	NA	TRUE	FALSE	NA	TRUE	NA
GCST90199655	4-methyl-2-oxopentanoate levels	8,255 European ancestry individuals	NA	FALSE	FALSE	15430745	NA	TRUE	FALSE	NA	TRUE	NA
GCST90199656	3-indoxyl sulfate levels	8,242 European ancestry individuals	NA	FALSE	FALSE	15430680	NA	TRUE	FALSE	NA	TRUE	NA
GCST90199657	Sphingosine 1-phosphate levels	8,246 European ancestry individuals	NA	FALSE	FALSE	15430743	NA	TRUE	FALSE	NA	TRUE	NA
GCST90199658	Alpha-hydroxyisocaproate levels	8,250 European ancestry individuals	NA	FALSE	FALSE	15430545	NA	TRUE	FALSE	NA	TRUE	NA
GCST90199659	1-stearoyl-GPI (18:0) levels	8,260 European ancestry individuals	NA	FALSE	FALSE	15431436	NA	TRUE	FALSE	NA	TRUE	NA
GCST90199660	1,2-dipalmitoyl-gpc (16:0/16:0) levels	8,264 European ancestry individuals	NA	FALSE	FALSE	15431093	NA	TRUE	FALSE	NA	TRUE	NA
GCST90199661	Maleate levels	8,171 European ancestry individuals	NA	FALSE	FALSE	15427980	NA	TRUE	FALSE	NA	TRUE	NA
GCST90199662	Isovalerate (i5:0) levels	7,862 European ancestry individuals	NA	FALSE	FALSE	15416733	NA	TRUE	FALSE	NA	TRUE	NA
GCST90199663	4-acetylphenol sulfate levels	7,135 European ancestry individuals	NA	FALSE	FALSE	15382806	NA	TRUE	FALSE	NA	TRUE	NA
GCST90199664	Phenyllactate (PLA) levels in elite athletes	8,235 European ancestry individuals	NA	FALSE	FALSE	15430234	NA	TRUE	FALSE	NA	TRUE	NA
GCST90199665	N-acetylaspartate (naa) levels	8,148 European ancestry individuals	NA	FALSE	FALSE	15427932	NA	TRUE	FALSE	NA	TRUE	NA
GCST90199666	Palmitoylcarnitine levels (Metabolon platform)	8,256 European ancestry individuals	NA	FALSE	FALSE	15430703	NA	TRUE	FALSE	NA	TRUE	NA
GCST90199667	Erythritol levels in elite athletes	8,167 European ancestry individuals	NA	FALSE	FALSE	15427701	NA	TRUE	FALSE	NA	TRUE	NA
GCST90199668	Hexanoylcarnitine levels (Biocrates platform)	8,242 European ancestry individuals	NA	FALSE	FALSE	15429420	NA	TRUE	FALSE	NA	TRUE	NA
GCST90199669	Acetylcarnitine levels (Biocrates platform)	8,262 European ancestry individuals	NA	FALSE	FALSE	15430904	NA	TRUE	FALSE	NA	TRUE	NA
GCST90199670	Iminodiacetate (IDA) levels	8,213 European ancestry individuals	NA	FALSE	FALSE	15428972	NA	TRUE	FALSE	NA	TRUE	NA
GCST90199671	Cysteine s-sulfate levels	8,229 European ancestry individuals	NA	FALSE	FALSE	15429338	NA	TRUE	FALSE	NA	TRUE	NA
GCST90199672	Oxalate (ethanedioate) levels	8,181 European ancestry individuals	NA	FALSE	FALSE	15427802	NA	TRUE	FALSE	NA	TRUE	NA
GCST90199673	DHEAS levels	8,228 European ancestry individuals	NA	FALSE	FALSE	15430202	NA	TRUE	FALSE	NA	TRUE	NA
GCST90199674	3-hydroxymyristate levels	8,235 European ancestry individuals	NA	FALSE	FALSE	15430577	NA	TRUE	FALSE	NA	TRUE	NA
GCST90199675	Homoarginine levels	8,265 European ancestry individuals	NA	FALSE	FALSE	15431411	NA	TRUE	FALSE	NA	TRUE	NA
GCST90199676	1-oleoylglycerol (18:1) levels	8,225 European ancestry individuals	NA	FALSE	FALSE	15429515	NA	TRUE	FALSE	NA	TRUE	NA
GCST90199677	3-methyl-2-oxobutyrate levels	8,254 European ancestry individuals	NA	FALSE	FALSE	15430708	NA	TRUE	FALSE	NA	TRUE	NA
GCST90199678	Tartronate (hydroxymalonate) levels	8,125 European ancestry individuals	NA	FALSE	FALSE	15424666	NA	TRUE	FALSE	NA	TRUE	NA
GCST90199679	2,3-dihydroxypyridine levels	6,496 European ancestry individuals	NA	FALSE	FALSE	15348665	NA	TRUE	FALSE	NA	TRUE	NA
GCST90199680	3-hydroxyoctanoate levels	8,182 European ancestry individuals	NA	FALSE	FALSE	15429088	NA	TRUE	FALSE	NA	TRUE	NA
GCST90199681	2-hydroxyoctanoate levels	8,224 European ancestry individuals	NA	FALSE	FALSE	15430073	NA	TRUE	FALSE	NA	TRUE	NA
GCST90199682	Homocitrulline levels	7,998 European ancestry individuals	NA	FALSE	FALSE	15423374	NA	TRUE	FALSE	NA	TRUE	NA
GCST90199683	Indoleacetate levels	8,208 European ancestry individuals	NA	FALSE	FALSE	15429489	NA	TRUE	FALSE	NA	TRUE	NA
GCST90199684	1-linoleoylglycerol (18:2) levels	8,212 European ancestry individuals	NA	FALSE	FALSE	15429326	NA	TRUE	FALSE	NA	TRUE	NA
GCST90199685	2-linoleoylglycerol (18:2) levels	6,378 European ancestry individuals	NA	FALSE	FALSE	15347823	NA	TRUE	FALSE	NA	TRUE	NA
GCST90199686	Indolepropionate levels	8,153 European ancestry individuals	NA	FALSE	FALSE	15426301	NA	TRUE	FALSE	NA	TRUE	NA
GCST90199687	Threonate levels	8,151 European ancestry individuals	NA	FALSE	FALSE	15426652	NA	TRUE	FALSE	NA	TRUE	NA
GCST90199688	N-acetylglycine levels	8,250 European ancestry individuals	NA	FALSE	FALSE	15431220	NA	TRUE	FALSE	NA	TRUE	NA
GCST90199689	Glycolithocholate levels	7,158 European ancestry individuals	NA	FALSE	FALSE	15388423	NA	TRUE	FALSE	NA	TRUE	NA
GCST90199690	EDTA levels	8,239 European ancestry individuals	NA	FALSE	FALSE	15430885	NA	TRUE	FALSE	NA	TRUE	NA
GCST90199691	1-methylhistidine levels	8,226 European ancestry individuals	NA	FALSE	FALSE	15430658	NA	TRUE	FALSE	NA	TRUE	NA
GCST90199692	Citramalate levels	7,125 European ancestry individuals	NA	FALSE	FALSE	15380674	NA	TRUE	FALSE	NA	TRUE	NA
GCST90199693	3-hydroxydecanoate levels	8,239 European ancestry individuals	NA	FALSE	FALSE	15430671	NA	TRUE	FALSE	NA	TRUE	NA
GCST90199694	1,3-dimethylurate levels	7,444 European ancestry individuals	NA	FALSE	FALSE	15400140	NA	TRUE	FALSE	NA	TRUE	NA
GCST90199695	Galactonate levels	7,518 European ancestry individuals	NA	FALSE	FALSE	15401807	NA	TRUE	FALSE	NA	TRUE	NA
GCST90199696	Trigonelline levels	8,272 European ancestry individuals	NA	FALSE	FALSE	15431117	NA	TRUE	FALSE	NA	TRUE	NA
GCST90199697	Dodecanedioate levels	8,240 European ancestry individuals	NA	FALSE	FALSE	15430983	NA	TRUE	FALSE	NA	TRUE	NA
GCST90199698	Isobutyrylcarnitine (c4) levels	8,243 European ancestry individuals	NA	FALSE	FALSE	15430355	NA	TRUE	FALSE	NA	TRUE	NA
GCST90199699	3-methylxanthine levels	8,085 European ancestry individuals	NA	FALSE	FALSE	15424754	NA	TRUE	FALSE	NA	TRUE	NA
GCST90199700	3-hydroxylaurate levels	8,206 European ancestry individuals	NA	FALSE	FALSE	15428790	NA	TRUE	FALSE	NA	TRUE	NA
GCST90199701	Pyridoxate levels	8,089 European ancestry individuals	NA	FALSE	FALSE	15426442	NA	TRUE	FALSE	NA	TRUE	NA
GCST90199702	5-hydroxyhexanoate levels	7,097 European ancestry individuals	NA	FALSE	FALSE	15379885	NA	TRUE	FALSE	NA	TRUE	NA
GCST90199703	Gamma-glutamylvaline levels	8,179 European ancestry individuals	NA	FALSE	FALSE	15427133	NA	TRUE	FALSE	NA	TRUE	NA
GCST90199704	3-hydroxysebacate levels	7,325 European ancestry individuals	NA	FALSE	FALSE	15395259	NA	TRUE	FALSE	NA	TRUE	NA
GCST90199705	Propionylglycine levels	7,311 European ancestry individuals	NA	FALSE	FALSE	15389974	NA	TRUE	FALSE	NA	TRUE	NA
GCST90199706	Butyrylglycine levels	6,044 European ancestry individuals	NA	FALSE	FALSE	15318173	NA	TRUE	FALSE	NA	TRUE	NA
GCST90199707	Pro-hydroxy-pro levels	8,208 European ancestry individuals	NA	FALSE	FALSE	15429393	NA	TRUE	FALSE	NA	TRUE	NA
GCST90199708	Propionylcarnitine (c3) levels	8,273 European ancestry individuals	NA	FALSE	FALSE	15430782	NA	TRUE	FALSE	NA	TRUE	NA
GCST90199709	Adrenate (22:4n6) levels	8,279 European ancestry individuals	NA	FALSE	FALSE	15431484	NA	TRUE	FALSE	NA	TRUE	NA
GCST90199710	Docosatrienoate (22:3n3) levels	6,511 European ancestry individuals	NA	FALSE	FALSE	15351145	NA	TRUE	FALSE	NA	TRUE	NA
GCST90199711	Docosadienoate (22:2n6) levels	8,264 European ancestry individuals	NA	FALSE	FALSE	15431075	NA	TRUE	FALSE	NA	TRUE	NA
GCST90199712	3-carboxy-4-methyl-5-propyl-2-furanpropanoate (cmpf) levels	8,270 European ancestry individuals	NA	FALSE	FALSE	15431473	NA	TRUE	FALSE	NA	TRUE	NA
GCST90199713	Docosapentaenoate n3 DPA; 22:5n3 levels	8,284 European ancestry individuals	NA	FALSE	FALSE	15431726	NA	TRUE	FALSE	NA	TRUE	NA
GCST90199714	3-hydroxy-2-ethylpropionate levels	8,238 European ancestry individuals	NA	FALSE	FALSE	15430961	NA	TRUE	FALSE	NA	TRUE	NA
GCST90199715	Myristoleate (14:1n5) levels	8,255 European ancestry individuals	NA	FALSE	FALSE	15430947	NA	TRUE	FALSE	NA	TRUE	NA
GCST90199716	10-undecenoate (11:1n1) levels	8,243 European ancestry individuals	NA	FALSE	FALSE	15430792	NA	TRUE	FALSE	NA	TRUE	NA
GCST90199717	1-methyl-4-imidazoleacetate levels	8,090 European ancestry individuals	NA	FALSE	FALSE	15426269	NA	TRUE	FALSE	NA	TRUE	NA
GCST90199718	Sebacate (C10-DC) levels	7,926 European ancestry individuals	NA	FALSE	FALSE	15418507	NA	TRUE	FALSE	NA	TRUE	NA
GCST90199719	Tauro-beta-muricholate levels	4,661 European ancestry individuals	NA	FALSE	FALSE	15455462	NA	TRUE	FALSE	NA	TRUE	NA
GCST90199720	Octanoylcarnitine (c8) levels	8,226 European ancestry individuals	NA	FALSE	FALSE	15428886	NA	TRUE	FALSE	NA	TRUE	NA
GCST90199721	Stearidonate (18:4n3) levels	8,240 European ancestry individuals	NA	FALSE	FALSE	15430435	NA	TRUE	FALSE	NA	TRUE	NA
GCST90199722	Decanoylcarnitine (C10) levels	8,225 European ancestry individuals	NA	FALSE	FALSE	15429753	NA	TRUE	FALSE	NA	TRUE	NA
GCST90199723	5-dodecenoate (12:1n7) levels	8,248 European ancestry individuals	NA	FALSE	FALSE	15430644	NA	TRUE	FALSE	NA	TRUE	NA
GCST90199724	N-acetylisoleucine levels	7,223 European ancestry individuals	NA	FALSE	FALSE	15387915	NA	TRUE	FALSE	NA	TRUE	NA
GCST90199725	Campesterol levels	5,300 European ancestry individuals	NA	FALSE	FALSE	15266412	NA	TRUE	FALSE	NA	TRUE	NA
GCST90199726	N-acetylthreonine levels	8,223 European ancestry individuals	NA	FALSE	FALSE	15429508	NA	TRUE	FALSE	NA	TRUE	NA
GCST90199727	1-oleoyl-GPC (18:1) levels	8,257 European ancestry individuals	NA	FALSE	FALSE	15431353	NA	TRUE	FALSE	NA	TRUE	NA
GCST90199728	10-nonadecenoate (19:1n9) levels	8,277 European ancestry individuals	NA	FALSE	FALSE	15431871	NA	TRUE	FALSE	NA	TRUE	NA
GCST90199729	Piperine levels	8,155 European ancestry individuals	NA	FALSE	FALSE	15427074	NA	TRUE	FALSE	NA	TRUE	NA
GCST90199730	Carnitine C14 levels	8,241 European ancestry individuals	NA	FALSE	FALSE	15430473	NA	TRUE	FALSE	NA	TRUE	NA
GCST90199731	10-heptadecenoate (17:1n7) levels	8,282 European ancestry individuals	NA	FALSE	FALSE	15431756	NA	TRUE	FALSE	NA	TRUE	NA
GCST90199732	1-stearoyl-gpc (18:0) levels	8,240 European ancestry individuals	NA	FALSE	FALSE	15430765	NA	TRUE	FALSE	NA	TRUE	NA
GCST90199733	1-palmitoyl-GPC (16:0) levels	8,232 European ancestry individuals	NA	FALSE	FALSE	15430245	NA	TRUE	FALSE	NA	TRUE	NA
GCST90199734	Hyocholate levels	5,782 European ancestry individuals	NA	FALSE	FALSE	15307258	NA	TRUE	FALSE	NA	TRUE	NA
GCST90199735	N-acetylhistidine levels	7,054 European ancestry individuals	NA	FALSE	FALSE	15378724	NA	TRUE	FALSE	NA	TRUE	NA
GCST90199736	Alpha-hydroxyisovalerate levels	8,208 European ancestry individuals	NA	FALSE	FALSE	15429530	NA	TRUE	FALSE	NA	TRUE	NA
GCST90199737	N-acetylproline levels	7,100 European ancestry individuals	NA	FALSE	FALSE	15377687	NA	TRUE	FALSE	NA	TRUE	NA
GCST90199738	Stachydrine levels	8,297 European ancestry individuals	NA	FALSE	FALSE	15432365	NA	TRUE	FALSE	NA	TRUE	NA
GCST90199739	Salicyluric glucuronide levels	5,190 European ancestry individuals	NA	FALSE	FALSE	15246649	NA	TRUE	FALSE	NA	TRUE	NA
GCST90199740	P-cresol sulfate levels	8,183 European ancestry individuals	NA	FALSE	FALSE	15426685	NA	TRUE	FALSE	NA	TRUE	NA
GCST90199741	Gamma-glutamylglycine levels	8,263 European ancestry individuals	NA	FALSE	FALSE	15431301	NA	TRUE	FALSE	NA	TRUE	NA
GCST90199742	1-linoleoyl-gpc (18:2) levels	8,262 European ancestry individuals	NA	FALSE	FALSE	15431252	NA	TRUE	FALSE	NA	TRUE	NA
GCST90199743	Stearoylcarnitine levels	8,133 European ancestry individuals	NA	FALSE	FALSE	15425275	NA	TRUE	FALSE	NA	TRUE	NA
GCST90199744	Eicosenoate (20:1) levels	8,277 European ancestry individuals	NA	FALSE	FALSE	15431781	NA	TRUE	FALSE	NA	TRUE	NA
GCST90199745	Aconitate [cis or trans] levels	8,262 European ancestry individuals	NA	FALSE	FALSE	15431438	NA	TRUE	FALSE	NA	TRUE	NA
GCST90199746	Erythronate levels	8,198 European ancestry individuals	NA	FALSE	FALSE	15430299	NA	TRUE	FALSE	NA	TRUE	NA
GCST90199747	Isovalerylcarnitine (C5) levels	8,266 European ancestry individuals	NA	FALSE	FALSE	15430948	NA	TRUE	FALSE	NA	TRUE	NA
GCST90199748	Linolenate [alpha or gamma; (18:3n3 or 6)] levels	8,257 European ancestry individuals	NA	FALSE	FALSE	15430765	NA	TRUE	FALSE	NA	TRUE	NA
GCST90199749	Gamma-glutamylthreonine levels	8,231 European ancestry individuals	NA	FALSE	FALSE	15429697	NA	TRUE	FALSE	NA	TRUE	NA
GCST90199750	Laurylcarnitine levels	8,241 European ancestry individuals	NA	FALSE	FALSE	15430538	NA	TRUE	FALSE	NA	TRUE	NA
GCST90199751	Gamma-glutamylmethionine levels	8,237 European ancestry individuals	NA	FALSE	FALSE	15430690	NA	TRUE	FALSE	NA	TRUE	NA
GCST90199752	Epiandrosterone sulfate levels	8,174 European ancestry individuals	NA	FALSE	FALSE	15427681	NA	TRUE	FALSE	NA	TRUE	NA
GCST90199753	Gamma-glutamyltryptophan levels	7,902 European ancestry individuals	NA	FALSE	FALSE	15418954	NA	TRUE	FALSE	NA	TRUE	NA
GCST90199754	7-methylxanthine levels	8,019 European ancestry individuals	NA	FALSE	FALSE	15423257	NA	TRUE	FALSE	NA	TRUE	NA
GCST90199755	3,7-dimethylurate levels	6,894 European ancestry individuals	NA	FALSE	FALSE	15365213	NA	TRUE	FALSE	NA	TRUE	NA
GCST90199756	1,7-dimethyluric acid levels	7,950 European ancestry individuals	NA	FALSE	FALSE	15421417	NA	TRUE	FALSE	NA	TRUE	NA
GCST90199757	1,3,7-trimethylurate levels	7,446 European ancestry individuals	NA	FALSE	FALSE	15397812	NA	TRUE	FALSE	NA	TRUE	NA
GCST90199758	N4-acetylcytidine levels	7,425 European ancestry individuals	NA	FALSE	FALSE	15398992	NA	TRUE	FALSE	NA	TRUE	NA
GCST90199759	Indolebutyrate levels	4,423 European ancestry individuals	NA	FALSE	FALSE	15434144	NA	TRUE	FALSE	NA	TRUE	NA
GCST90199760	5-acetylamino-6-amino-3-methyluracil levels	8,006 European ancestry individuals	NA	FALSE	FALSE	15422816	NA	TRUE	FALSE	NA	TRUE	NA
GCST90199761	N1-methylinosine levels	8,147 European ancestry individuals	NA	FALSE	FALSE	15425100	NA	TRUE	FALSE	NA	TRUE	NA
GCST90199762	N6-carbamoylthreonyladenosine levels	8,176 European ancestry individuals	NA	FALSE	FALSE	15429298	NA	TRUE	FALSE	NA	TRUE	NA
GCST90199763	1-methylxanthine levels	7,959 European ancestry individuals	NA	FALSE	FALSE	15419806	NA	TRUE	FALSE	NA	TRUE	NA
GCST90199764	N2,n2-dimethylguanosine levels	8,210 European ancestry individuals	NA	FALSE	FALSE	15429417	NA	TRUE	FALSE	NA	TRUE	NA
GCST90199765	4-hydroxyhippurate levels	8,259 European ancestry individuals	NA	FALSE	FALSE	15431248	NA	TRUE	FALSE	NA	TRUE	NA
GCST90199766	3-(3-amino-3-carboxypropyl)uridine levels	7,679 European ancestry individuals	NA	FALSE	FALSE	15408525	NA	TRUE	FALSE	NA	TRUE	NA
GCST90199767	5,6-dihydrouridine levels	8,210 European ancestry individuals	NA	FALSE	FALSE	15430360	NA	TRUE	FALSE	NA	TRUE	NA
GCST90199768	Phenylacetylglutamine levels	8,251 European ancestry individuals	NA	FALSE	FALSE	15430100	NA	TRUE	FALSE	NA	TRUE	NA
GCST90199769	3-hydroxydodecanedioate levels	7,168 European ancestry individuals	NA	FALSE	FALSE	15386702	NA	TRUE	FALSE	NA	TRUE	NA
GCST90199770	1-arachidonylglycerol (20:4) levels	7,650 European ancestry individuals	NA	FALSE	FALSE	15405138	NA	TRUE	FALSE	NA	TRUE	NA
GCST90199771	7-methylguanine levels	8,239 European ancestry individuals	NA	FALSE	FALSE	15431182	NA	TRUE	FALSE	NA	TRUE	NA
GCST90199772	1-stearoyl-GPE (18:0) levels	8,270 European ancestry individuals	NA	FALSE	FALSE	15431209	NA	TRUE	FALSE	NA	TRUE	NA
GCST90199773	Phenol sulfate levels	8,249 European ancestry individuals	NA	FALSE	FALSE	15431288	NA	TRUE	FALSE	NA	TRUE	NA
GCST90199774	Oleoylcarnitine levels	8,260 European ancestry individuals	NA	FALSE	FALSE	15430785	NA	TRUE	FALSE	NA	TRUE	NA
GCST90199775	Gamma-glutamylisoleucine levels	8,267 European ancestry individuals	NA	FALSE	FALSE	15431848	NA	TRUE	FALSE	NA	TRUE	NA
GCST90199776	Malonylcarnitine levels	5,822 European ancestry individuals	NA	FALSE	FALSE	15307020	NA	TRUE	FALSE	NA	TRUE	NA
GCST90199777	1-palmitoleoyl-GPC (16:1) levels	8,227 European ancestry individuals	NA	FALSE	FALSE	15430107	NA	TRUE	FALSE	NA	TRUE	NA
GCST90199778	N-methyl-2-pyridone-5-carboxamide levels	8,177 European ancestry individuals	NA	FALSE	FALSE	15429353	NA	TRUE	FALSE	NA	TRUE	NA
GCST90199779	Gamma-glutamyl-2-aminobutyrate levels	7,826 European ancestry individuals	NA	FALSE	FALSE	15415623	NA	TRUE	FALSE	NA	TRUE	NA
GCST90199780	1-stearoyl-GPG (18:0) levels	6,806 European ancestry individuals	NA	FALSE	FALSE	15369548	NA	TRUE	FALSE	NA	TRUE	NA
GCST90199781	Hexanoylglycine levels	6,015 European ancestry individuals	NA	FALSE	FALSE	15320808	NA	TRUE	FALSE	NA	TRUE	NA
GCST90199782	Glutamine degradant levels	8,293 European ancestry individuals	NA	FALSE	FALSE	15432089	NA	TRUE	FALSE	NA	TRUE	NA
GCST90199783	5-methyluridine (ribothymidine) levels	8,168 European ancestry individuals	NA	FALSE	FALSE	15425756	NA	TRUE	FALSE	NA	TRUE	NA
GCST90199784	Cysteine-glutathione disulfide levels	7,812 European ancestry individuals	NA	FALSE	FALSE	15412400	NA	TRUE	FALSE	NA	TRUE	NA
GCST90199785	Isovalerylglycine levels	7,100 European ancestry individuals	NA	FALSE	FALSE	15377875	NA	TRUE	FALSE	NA	TRUE	NA
GCST90199786	2-hydroxy-3-methylvalerate levels	8,246 European ancestry individuals	NA	FALSE	FALSE	15430196	NA	TRUE	FALSE	NA	TRUE	NA
GCST90199787	Homostachydrine levels	8,248 European ancestry individuals	NA	FALSE	FALSE	15430710	NA	TRUE	FALSE	NA	TRUE	NA
GCST90199788	1-arachidonoyl-gpc (20:4n6) levels	8,267 European ancestry individuals	NA	FALSE	FALSE	15431209	NA	TRUE	FALSE	NA	TRUE	NA
GCST90199789	2-palmitoyl-GPC (16:0) levels	8,249 European ancestry individuals	NA	FALSE	FALSE	15429100	NA	TRUE	FALSE	NA	TRUE	NA
GCST90199790	2-palmitoleoyl-GPC (16:1) levels	6,697 European ancestry individuals	NA	FALSE	FALSE	15368612	NA	TRUE	FALSE	NA	TRUE	NA
GCST90199791	1-arachidonoyl-GPE (20:4n6) levels	8,270 European ancestry individuals	NA	FALSE	FALSE	15431214	NA	TRUE	FALSE	NA	TRUE	NA
GCST90199792	1-palmitoyl-GPE (16:0) levels	8,276 European ancestry individuals	NA	FALSE	FALSE	15431695	NA	TRUE	FALSE	NA	TRUE	NA
GCST90199793	1-linoleoyl-GPE (18:2) levels	8,279 European ancestry individuals	NA	FALSE	FALSE	15431550	NA	TRUE	FALSE	NA	TRUE	NA
GCST90199794	1-oleoyl-GPE (18:1) levels	8,283 European ancestry individuals	NA	FALSE	FALSE	15431821	NA	TRUE	FALSE	NA	TRUE	NA
GCST90199795	2-hydroxypalmitate levels	8,247 European ancestry individuals	NA	FALSE	FALSE	15429034	NA	TRUE	FALSE	NA	TRUE	NA
GCST90199796	Docosapentaenoate (n6 DPA; 22:5n6) levels	7,540 European ancestry individuals	NA	FALSE	FALSE	15396940	NA	TRUE	FALSE	NA	TRUE	NA
GCST90199797	Gulonate levels	7,731 European ancestry individuals	NA	FALSE	FALSE	15408876	NA	TRUE	FALSE	NA	TRUE	NA
GCST90199798	Isobutyrylglycine levels	7,465 European ancestry individuals	NA	FALSE	FALSE	15394379	NA	TRUE	FALSE	NA	TRUE	NA
GCST90199799	Glutarylcarnitine (c5-dc) levels	8,238 European ancestry individuals	NA	FALSE	FALSE	15430922	NA	TRUE	FALSE	NA	TRUE	NA
GCST90199800	Carnitine C5:1 levels	8,097 European ancestry individuals	NA	FALSE	FALSE	15425180	NA	TRUE	FALSE	NA	TRUE	NA
GCST90199801	Hydroquinone sulfate levels	7,682 European ancestry individuals	NA	FALSE	FALSE	15406574	NA	TRUE	FALSE	NA	TRUE	NA
GCST90199802	Beta-hydroxyisovaleroylcarnitine levels	8,232 European ancestry individuals	NA	FALSE	FALSE	15429018	NA	TRUE	FALSE	NA	TRUE	NA
GCST90199803	Catechol sulfate levels	8,242 European ancestry individuals	NA	FALSE	FALSE	15430757	NA	TRUE	FALSE	NA	TRUE	NA
GCST90199804	7-alpha-hydroxy-3-oxo-4-cholestenoate (7-hoca) levels	8,236 European ancestry individuals	NA	FALSE	FALSE	15429851	NA	TRUE	FALSE	NA	TRUE	NA
GCST90199805	Octadecanedioate levels	8,223 European ancestry individuals	NA	FALSE	FALSE	15429412	NA	TRUE	FALSE	NA	TRUE	NA
GCST90199806	Tetradecanedioate (C14-DC) levels	8,268 European ancestry individuals	NA	FALSE	FALSE	15431625	NA	TRUE	FALSE	NA	TRUE	NA
GCST90199807	Hexadecanedioate (C16-DC) levels	8,260 European ancestry individuals	NA	FALSE	FALSE	15431581	NA	TRUE	FALSE	NA	TRUE	NA
GCST90199808	Glycerophosphoethanolamine levels	8,231 European ancestry individuals	NA	FALSE	FALSE	15430230	NA	TRUE	FALSE	NA	TRUE	NA
GCST90199809	Taurolithocholate 3-sulfate levels	8,124 European ancestry individuals	NA	FALSE	FALSE	15426475	NA	TRUE	FALSE	NA	TRUE	NA
GCST90199810	1-palmitoyl-GPI (16:0) levels	8,246 European ancestry individuals	NA	FALSE	FALSE	15429953	NA	TRUE	FALSE	NA	TRUE	NA
GCST90199811	Glycolithocholate sulfate levels	8,165 European ancestry individuals	NA	FALSE	FALSE	15427926	NA	TRUE	FALSE	NA	TRUE	NA
GCST90199812	3-(3-hydroxyphenyl)propionate levels	7,304 European ancestry individuals	NA	FALSE	FALSE	15393079	NA	TRUE	FALSE	NA	TRUE	NA
GCST90199813	Deoxycarnitine levels	8,271 European ancestry individuals	NA	FALSE	FALSE	15431333	NA	TRUE	FALSE	NA	TRUE	NA
GCST90199814	Alpha-hydroxycaproate levels	5,169 European ancestry individuals	NA	FALSE	FALSE	15254609	NA	TRUE	FALSE	NA	TRUE	NA
GCST90199815	1-ribosyl-imidazoleacetate levels	8,205 European ancestry individuals	NA	FALSE	FALSE	15428278	NA	TRUE	FALSE	NA	TRUE	NA
GCST90199816	3,4-dihydroxybutyrate levels	8,142 European ancestry individuals	NA	FALSE	FALSE	15426237	NA	TRUE	FALSE	NA	TRUE	NA
GCST90199817	Indoleacetylglutamine levels	6,161 European ancestry individuals	NA	FALSE	FALSE	15333169	NA	TRUE	FALSE	NA	TRUE	NA
GCST90199818	Mannitol/sorbitol levels	8,211 European ancestry individuals	NA	FALSE	FALSE	15429432	NA	TRUE	FALSE	NA	TRUE	NA
GCST90199819	Tryptophan betaine levels	8,216 European ancestry individuals	NA	FALSE	FALSE	15429826	NA	TRUE	FALSE	NA	TRUE	NA
GCST90199820	Dihomo-linolenate (20:3n3 or n6) levels	8,273 European ancestry individuals	NA	FALSE	FALSE	15431551	NA	TRUE	FALSE	NA	TRUE	NA
GCST90199821	1-linoleoyl-GPI (18:2) levels	8,268 European ancestry individuals	NA	FALSE	FALSE	15431346	NA	TRUE	FALSE	NA	TRUE	NA
GCST90199822	1-oleoyl-GPI (18:1) levels	8,252 European ancestry individuals	NA	FALSE	FALSE	15430412	NA	TRUE	FALSE	NA	TRUE	NA
GCST90199823	O-cresol sulfate levels	7,315 European ancestry individuals	NA	FALSE	FALSE	15394885	NA	TRUE	FALSE	NA	TRUE	NA
GCST90199824	4-vinylphenol sulfate levels	8,280 European ancestry individuals	NA	FALSE	FALSE	15431687	NA	TRUE	FALSE	NA	TRUE	NA
GCST90199825	Pyrraline levels	7,920 European ancestry individuals	NA	FALSE	FALSE	15418168	NA	TRUE	FALSE	NA	TRUE	NA
GCST90199826	N6-acetyllysine levels	8,242 European ancestry individuals	NA	FALSE	FALSE	15430891	NA	TRUE	FALSE	NA	TRUE	NA
GCST90199827	Thymol sulfate levels	8,063 European ancestry individuals	NA	FALSE	FALSE	15425707	NA	TRUE	FALSE	NA	TRUE	NA
GCST90199828	N-acetylserine levels	8,217 European ancestry individuals	NA	FALSE	FALSE	15429926	NA	TRUE	FALSE	NA	TRUE	NA
GCST90199829	3-methyladipate levels	6,958 European ancestry individuals	NA	FALSE	FALSE	15370715	NA	TRUE	FALSE	NA	TRUE	NA
GCST90199830	4-ethylphenylsulfate levels	8,139 European ancestry individuals	NA	FALSE	FALSE	15426298	NA	TRUE	FALSE	NA	TRUE	NA
GCST90199831	1-stearoyl-2-oleoyl-GPE (18:0/18:1) levels	8,273 European ancestry individuals	NA	FALSE	FALSE	15430613	NA	TRUE	FALSE	NA	TRUE	NA
GCST90199832	Dimethylarginine (sdma + adma) levels	8,233 European ancestry individuals	NA	FALSE	FALSE	15430885	NA	TRUE	FALSE	NA	TRUE	NA
GCST90199833	Hexanoylglutamine levels	8,128 European ancestry individuals	NA	FALSE	FALSE	15425917	NA	TRUE	FALSE	NA	TRUE	NA
GCST90199834	Gamma-glutamylalanine levels	7,518 European ancestry individuals	NA	FALSE	FALSE	15403446	NA	TRUE	FALSE	NA	TRUE	NA
GCST90199835	5alpha-androstan-3beta,17beta-diol disulfate levels	8,199 European ancestry individuals	NA	FALSE	FALSE	15429186	NA	TRUE	FALSE	NA	TRUE	NA
GCST90199836	N-methylproline levels	8,299 European ancestry individuals	NA	FALSE	FALSE	15432359	NA	TRUE	FALSE	NA	TRUE	NA
GCST90199837	Carotenoid levels (cryptoxanthin)	8,226 European ancestry individuals	NA	FALSE	FALSE	15430545	NA	TRUE	FALSE	NA	TRUE	NA
GCST90199838	5alpha-pregnan-3beta,20alpha-diol disulfate levels	8,130 European ancestry individuals	NA	FALSE	FALSE	15426253	NA	TRUE	FALSE	NA	TRUE	NA
GCST90199839	Taurocholenate sulfate levels	8,249 European ancestry individuals	NA	FALSE	FALSE	15430558	NA	TRUE	FALSE	NA	TRUE	NA
GCST90199840	Pregnenediol disulfate (C21H34O8S2) levels	8,245 European ancestry individuals	NA	FALSE	FALSE	15430325	NA	TRUE	FALSE	NA	TRUE	NA
GCST90199841	Glycocholenate sulfate levels	8,250 European ancestry individuals	NA	FALSE	FALSE	15431008	NA	TRUE	FALSE	NA	TRUE	NA
GCST90199842	Androstenediol (3beta,17beta) disulfate (1) levels	8,222 European ancestry individuals	NA	FALSE	FALSE	15429865	NA	TRUE	FALSE	NA	TRUE	NA
GCST90199843	Chiro-inositol levels	4,429 European ancestry individuals	NA	FALSE	FALSE	15438875	NA	TRUE	FALSE	NA	TRUE	NA
GCST90199844	1-palmitoyl-2-linoleoyl-GPE (16:0/18:2) levels	8,266 European ancestry individuals	NA	FALSE	FALSE	15431047	NA	TRUE	FALSE	NA	TRUE	NA
GCST90199845	Sphinganine-1-phosphate levels	8,126 European ancestry individuals	NA	FALSE	FALSE	15426841	NA	TRUE	FALSE	NA	TRUE	NA
GCST90199846	Glycosyl-N-stearoyl-sphingosine (d18:1/18:0) levels	8,233 European ancestry individuals	NA	FALSE	FALSE	15430876	NA	TRUE	FALSE	NA	TRUE	NA
GCST90199847	4-allylphenol sulfate levels	8,240 European ancestry individuals	NA	FALSE	FALSE	15430706	NA	TRUE	FALSE	NA	TRUE	NA
GCST90199848	Succinylcarnitine levels	8,212 European ancestry individuals	NA	FALSE	FALSE	15429213	NA	TRUE	FALSE	NA	TRUE	NA
GCST90199849	21-hydroxypregnenolone disulfate levels	8,132 European ancestry individuals	NA	FALSE	FALSE	15427123	NA	TRUE	FALSE	NA	TRUE	NA
GCST90199850	5alpha-androstan-3alpha,17alpha-diol monosulfate levels	5,524 European ancestry individuals	NA	FALSE	FALSE	15287918	NA	TRUE	FALSE	NA	TRUE	NA
GCST90199851	Androstenediol (3beta,17beta) disulfate (2) levels	8,205 European ancestry individuals	NA	FALSE	FALSE	15429506	NA	TRUE	FALSE	NA	TRUE	NA
GCST90199852	5alpha-androstan-3beta,17alpha-diol disulfate levels	7,103 European ancestry individuals	NA	FALSE	FALSE	15382959	NA	TRUE	FALSE	NA	TRUE	NA
GCST90199853	5alpha-pregnan-3beta,20beta-diol monosulfate (1) levels	7,772 European ancestry individuals	NA	FALSE	FALSE	15411349	NA	TRUE	FALSE	NA	TRUE	NA
GCST90199854	5alpha-pregnan-3beta,20alpha-diol monosulfate (2) levels	8,028 European ancestry individuals	NA	FALSE	FALSE	15421968	NA	TRUE	FALSE	NA	TRUE	NA
GCST90199855	5alpha-androstan-3beta,17beta-diol monosulfate (2) levels	7,066 European ancestry individuals	NA	FALSE	FALSE	15381870	NA	TRUE	FALSE	NA	TRUE	NA
GCST90199856	Androstenediol (3alpha, 17alpha) monosulfate (3) levels	8,192 European ancestry individuals	NA	FALSE	FALSE	15427785	NA	TRUE	FALSE	NA	TRUE	NA
GCST90199857	5alpha-pregnan-diol disulfate levels	4,110 European ancestry individuals	NA	FALSE	FALSE	15414471	NA	TRUE	FALSE	NA	TRUE	NA
GCST90199858	5alpha-androstan-3alpha,17beta-diol monosulfate (1) levels	7,608 European ancestry individuals	NA	FALSE	FALSE	15403280	NA	TRUE	FALSE	NA	TRUE	NA
GCST90199859	5alpha-androstan-3alpha,17beta-diol disulfate levels	5,082 European ancestry individuals	NA	FALSE	FALSE	15262122	NA	TRUE	FALSE	NA	TRUE	NA
GCST90199860	Andro steroid monosulfate C19H28O6S (1) levels	7,415 European ancestry individuals	NA	FALSE	FALSE	15400078	NA	TRUE	FALSE	NA	TRUE	NA
GCST90199861	Pregnenediol sulfate (C21H34O5S) levels	8,260 European ancestry individuals	NA	FALSE	FALSE	15431064	NA	TRUE	FALSE	NA	TRUE	NA
GCST90199862	4-hydroxycoumarin levels	6,944 European ancestry individuals	NA	FALSE	FALSE	15374017	NA	TRUE	FALSE	NA	TRUE	NA
GCST90199863	16a-hydroxy DHEA 3-sulfate levels	8,236 European ancestry individuals	NA	FALSE	FALSE	15430452	NA	TRUE	FALSE	NA	TRUE	NA
GCST90199864	Gamma-CEHC levels	8,258 European ancestry individuals	NA	FALSE	FALSE	15431258	NA	TRUE	FALSE	NA	TRUE	NA
GCST90199865	2-hydroxyglutarate levels	7,769 European ancestry individuals	NA	FALSE	FALSE	15410641	NA	TRUE	FALSE	NA	TRUE	NA
GCST90199866	N-acetyl-beta-alanine levels	8,231 European ancestry individuals	NA	FALSE	FALSE	15429802	NA	TRUE	FALSE	NA	TRUE	NA
GCST90199867	Tridecenedioate (C13:1-DC) levels	8,231 European ancestry individuals	NA	FALSE	FALSE	15430032	NA	TRUE	FALSE	NA	TRUE	NA
GCST90199868	N-acetyl-3-methylhistidine levels	7,018 European ancestry individuals	NA	FALSE	FALSE	15375592	NA	TRUE	FALSE	NA	TRUE	NA
GCST90199869	2-hydroxyhippurate levels	8,241 European ancestry individuals	NA	FALSE	FALSE	15430548	NA	TRUE	FALSE	NA	TRUE	NA
GCST90199870	4-cholesten-3-one levels	6,990 European ancestry individuals	NA	FALSE	FALSE	15371286	NA	TRUE	FALSE	NA	TRUE	NA
GCST90199871	Androstenediol (3beta,17beta) monosulfate (2) levels	7,811 European ancestry individuals	NA	FALSE	FALSE	15413054	NA	TRUE	FALSE	NA	TRUE	NA
GCST90199872	Androstenediol (3beta,17beta) monosulfate (1) levels	8,229 European ancestry individuals	NA	FALSE	FALSE	15430268	NA	TRUE	FALSE	NA	TRUE	NA
GCST90199873	Pregnenolone sulfate levels	7,772 European ancestry individuals	NA	FALSE	FALSE	15413931	NA	TRUE	FALSE	NA	TRUE	NA
GCST90199874	S-methylmethionine levels	6,674 European ancestry individuals	NA	FALSE	FALSE	15364965	NA	TRUE	FALSE	NA	TRUE	NA
GCST90199875	13-HODE + 9-HODE levels	8,207 European ancestry individuals	NA	FALSE	FALSE	15428910	NA	TRUE	FALSE	NA	TRUE	NA
GCST90199876	Palmitoyl sphingomyelin (d18:1/16:0) levels	8,269 European ancestry individuals	NA	FALSE	FALSE	15431031	NA	TRUE	FALSE	NA	TRUE	NA
GCST90199877	Indole-3-carboxylate levels	4,989 European ancestry individuals	NA	FALSE	FALSE	15470849	NA	TRUE	FALSE	NA	TRUE	NA
GCST90199878	Sphingomyelin (d18:1/18:1, d18:2/18:0) levels	8,267 European ancestry individuals	NA	FALSE	FALSE	15431499	NA	TRUE	FALSE	NA	TRUE	NA
GCST90199879	Ergothioneine levels	8,210 European ancestry individuals	NA	FALSE	FALSE	15429529	NA	TRUE	FALSE	NA	TRUE	NA
GCST90199880	Cis-4-decenoylcarnitine (C10:1) levels	8,239 European ancestry individuals	NA	FALSE	FALSE	15429223	NA	TRUE	FALSE	NA	TRUE	NA
GCST90199881	5-(galactosylhydroxy)-L-lysine levels	6,898 European ancestry individuals	NA	FALSE	FALSE	15373827	NA	TRUE	FALSE	NA	TRUE	NA
GCST90199882	2s,3R-dihydroxybutyrate levels	8,252 European ancestry individuals	NA	FALSE	FALSE	15430874	NA	TRUE	FALSE	NA	TRUE	NA
GCST90199883	Cysteinylglycine disulfide levels	8,216 European ancestry individuals	NA	FALSE	FALSE	15430163	NA	TRUE	FALSE	NA	TRUE	NA
GCST90199884	2,3-dihydroxyisovalerate levels	8,268 European ancestry individuals	NA	FALSE	FALSE	15431341	NA	TRUE	FALSE	NA	TRUE	NA
GCST90199885	Alpha-ketoglutaramate levels	8,210 European ancestry individuals	NA	FALSE	FALSE	15428556	NA	TRUE	FALSE	NA	TRUE	NA
GCST90199886	3-methylglutaconate levels	8,197 European ancestry individuals	NA	FALSE	FALSE	15429664	NA	TRUE	FALSE	NA	TRUE	NA
GCST90199887	(16 or 17)-methylstearate (a19:0 or i19:0) levels	8,239 European ancestry individuals	NA	FALSE	FALSE	15429669	NA	TRUE	FALSE	NA	TRUE	NA
GCST90199888	Cinnamoylglycine levels	7,824 European ancestry individuals	NA	FALSE	FALSE	15412918	NA	TRUE	FALSE	NA	TRUE	NA
GCST90199889	2R,3R-dihydroxybutyrate levels	8,223 European ancestry individuals	NA	FALSE	FALSE	15428972	NA	TRUE	FALSE	NA	TRUE	NA
GCST90199890	4-hydroxyglutamate levels	7,226 European ancestry individuals	NA	FALSE	FALSE	15386294	NA	TRUE	FALSE	NA	TRUE	NA
GCST90199891	S-methylcysteine levels	8,239 European ancestry individuals	NA	FALSE	FALSE	15430622	NA	TRUE	FALSE	NA	TRUE	NA
GCST90199892	Isoursodeoxycholate levels	8,234 European ancestry individuals	NA	FALSE	FALSE	15429765	NA	TRUE	FALSE	NA	TRUE	NA
GCST90199893	Cis-4-decenoate (10:1n6) levels	8,173 European ancestry individuals	NA	FALSE	FALSE	15425854	NA	TRUE	FALSE	NA	TRUE	NA
GCST90199894	4-oxo-retinoic acid levels	7,514 European ancestry individuals	NA	FALSE	FALSE	15398514	NA	TRUE	FALSE	NA	TRUE	NA
GCST90199895	1-lignoceroyl-GPC (24:0) levels	8,208 European ancestry individuals	NA	FALSE	FALSE	15429351	NA	TRUE	FALSE	NA	TRUE	NA
GCST90199896	Sulfate levels	8,230 European ancestry individuals	NA	FALSE	FALSE	15430459	NA	TRUE	FALSE	NA	TRUE	NA
GCST90199897	4-hydroxy-2-oxoglutaric acid levels	7,919 European ancestry individuals	NA	FALSE	FALSE	15419695	NA	TRUE	FALSE	NA	TRUE	NA
GCST90199898	Glycoursodeoxycholate levels	8,252 European ancestry individuals	NA	FALSE	FALSE	15431087	NA	TRUE	FALSE	NA	TRUE	NA
GCST90199899	1-(1-enyl-palmitoyl)-GPC (p-16:0) levels	8,170 European ancestry individuals	NA	FALSE	FALSE	15428441	NA	TRUE	FALSE	NA	TRUE	NA
GCST90199900	Argininate levels	8,226 European ancestry individuals	NA	FALSE	FALSE	15429013	NA	TRUE	FALSE	NA	TRUE	NA
GCST90199901	1-methyl-5-imidazoleacetate levels	8,171 European ancestry individuals	NA	FALSE	FALSE	15427541	NA	TRUE	FALSE	NA	TRUE	NA
GCST90199902	Hydantoin-5-propionate levels	8,164 European ancestry individuals	NA	FALSE	FALSE	15427189	NA	TRUE	FALSE	NA	TRUE	NA
GCST90199903	2-oxoarginine levels	8,223 European ancestry individuals	NA	FALSE	FALSE	15429542	NA	TRUE	FALSE	NA	TRUE	NA
GCST90199904	Pantoate levels	7,662 European ancestry individuals	NA	FALSE	FALSE	15405454	NA	TRUE	FALSE	NA	TRUE	NA
GCST90199905	Formiminoglutamate levels	8,175 European ancestry individuals	NA	FALSE	FALSE	15429104	NA	TRUE	FALSE	NA	TRUE	NA
GCST90199906	1-(1-enyl-palmitoyl)-GPE (p-16:0) levels	8,227 European ancestry individuals	NA	FALSE	FALSE	15429960	NA	TRUE	FALSE	NA	TRUE	NA
GCST90199907	S-methylcysteine sulfoxide levels	8,255 European ancestry individuals	NA	FALSE	FALSE	15431132	NA	TRUE	FALSE	NA	TRUE	NA
GCST90199908	2-o-methylascorbic acid levels	8,219 European ancestry individuals	NA	FALSE	FALSE	15429532	NA	TRUE	FALSE	NA	TRUE	NA
GCST90199909	Eicosanedioate (C20-DC) levels	8,258 European ancestry individuals	NA	FALSE	FALSE	15431658	NA	TRUE	FALSE	NA	TRUE	NA
GCST90199910	1-(1-enyl-stearoyl)-GPE (p-18:0) levels	8,249 European ancestry individuals	NA	FALSE	FALSE	15430683	NA	TRUE	FALSE	NA	TRUE	NA
GCST90199911	Beta-citrylglutamate levels	8,226 European ancestry individuals	NA	FALSE	FALSE	15428418	NA	TRUE	FALSE	NA	TRUE	NA
GCST90199912	N-oleoyltaurine levels	7,375 European ancestry individuals	NA	FALSE	FALSE	15399662	NA	TRUE	FALSE	NA	TRUE	NA
GCST90199913	Docosadioate (C22-DC) levels	8,225 European ancestry individuals	NA	FALSE	FALSE	15430526	NA	TRUE	FALSE	NA	TRUE	NA
GCST90199914	Oleoyl-linoleoyl-glycerol (18:1/18:2) [2] levels	8,069 European ancestry individuals	NA	FALSE	FALSE	15421754	NA	TRUE	FALSE	NA	TRUE	NA
GCST90199915	Imidazole propionate levels	7,776 European ancestry individuals	NA	FALSE	FALSE	15411851	NA	TRUE	FALSE	NA	TRUE	NA
GCST90199916	Carnitine C18:2 levels	8,268 European ancestry individuals	NA	FALSE	FALSE	15431421	NA	TRUE	FALSE	NA	TRUE	NA
GCST90199917	Pregnanediol-3-glucuronide levels	7,905 European ancestry individuals	NA	FALSE	FALSE	15417781	NA	TRUE	FALSE	NA	TRUE	NA
GCST90199918	Carboxyethyl-gaba levels	8,090 European ancestry individuals	NA	FALSE	FALSE	15425127	NA	TRUE	FALSE	NA	TRUE	NA
GCST90199919	Alliin levels	6,517 European ancestry individuals	NA	FALSE	FALSE	15353233	NA	TRUE	FALSE	NA	TRUE	NA
GCST90199920	Trimethylamine n-oxide levels	8,218 European ancestry individuals	NA	FALSE	FALSE	15430398	NA	TRUE	FALSE	NA	TRUE	NA
GCST90199921	Dihydroferulate levels	6,398 European ancestry individuals	NA	FALSE	FALSE	15341969	NA	TRUE	FALSE	NA	TRUE	NA
GCST90199922	Prolylglycine levels	7,907 European ancestry individuals	NA	FALSE	FALSE	15418917	NA	TRUE	FALSE	NA	TRUE	NA
GCST90199923	N-palmitoylglycine levels	8,236 European ancestry individuals	NA	FALSE	FALSE	15428633	NA	TRUE	FALSE	NA	TRUE	NA
GCST90199924	N-methyltaurine levels	5,440 European ancestry individuals	NA	FALSE	FALSE	15275322	NA	TRUE	FALSE	NA	TRUE	NA
GCST90199925	Succinimide levels	5,865 European ancestry individuals	NA	FALSE	FALSE	15305762	NA	TRUE	FALSE	NA	TRUE	NA
GCST90199926	N-acetylcarnosine levels	8,233 European ancestry individuals	NA	FALSE	FALSE	15430258	NA	TRUE	FALSE	NA	TRUE	NA
GCST90199927	Histidine betaine (hercynine) levels	7,518 European ancestry individuals	NA	FALSE	FALSE	15401295	NA	TRUE	FALSE	NA	TRUE	NA
GCST90199928	2-stearoyl-GPE (18:0) levels	8,073 European ancestry individuals	NA	FALSE	FALSE	15425599	NA	TRUE	FALSE	NA	TRUE	NA
GCST90199929	Margaroylcarnitine (C17) levels	8,112 European ancestry individuals	NA	FALSE	FALSE	15424671	NA	TRUE	FALSE	NA	TRUE	NA
GCST90199930	(R)-3-hydroxybutyrylcarnitine levels	7,787 European ancestry individuals	NA	FALSE	FALSE	15412386	NA	TRUE	FALSE	NA	TRUE	NA
GCST90199931	Lanthionine levels	7,760 European ancestry individuals	NA	FALSE	FALSE	15411249	NA	TRUE	FALSE	NA	TRUE	NA
GCST90199932	Mannonate levels	8,166 European ancestry individuals	NA	FALSE	FALSE	15426658	NA	TRUE	FALSE	NA	TRUE	NA
GCST90199933	3b-hydroxy-5-cholenoic acid levels	6,846 European ancestry individuals	NA	FALSE	FALSE	15371635	NA	TRUE	FALSE	NA	TRUE	NA
GCST90199934	2-hydroxydecanoate levels	8,267 European ancestry individuals	NA	FALSE	FALSE	15431674	NA	TRUE	FALSE	NA	TRUE	NA
GCST90199935	Glycohyocholate levels	7,095 European ancestry individuals	NA	FALSE	FALSE	15388247	NA	TRUE	FALSE	NA	TRUE	NA
GCST90199936	3-methyl catechol sulfate (2) levels	6,320 European ancestry individuals	NA	FALSE	FALSE	15330990	NA	TRUE	FALSE	NA	TRUE	NA
GCST90199937	2-aminooctanoate levels	8,178 European ancestry individuals	NA	FALSE	FALSE	15428576	NA	TRUE	FALSE	NA	TRUE	NA
GCST90199938	3-methyl catechol sulfate (1) levels	8,233 European ancestry individuals	NA	FALSE	FALSE	15428063	NA	TRUE	FALSE	NA	TRUE	NA
GCST90199939	4-methylcatechol sulfate levels	8,229 European ancestry individuals	NA	FALSE	FALSE	15429970	NA	TRUE	FALSE	NA	TRUE	NA
GCST90199940	Guaiacol sulfate levels	8,262 European ancestry individuals	NA	FALSE	FALSE	15431355	NA	TRUE	FALSE	NA	TRUE	NA
GCST90199941	Gamma-CEHC glucuronide levels	6,305 European ancestry individuals	NA	FALSE	FALSE	15336085	NA	TRUE	FALSE	NA	TRUE	NA
GCST90199942	Dimethyl sulfone levels	7,905 European ancestry individuals	NA	FALSE	FALSE	15417516	NA	TRUE	FALSE	NA	TRUE	NA
GCST90199943	2-piperidinone levels	8,225 European ancestry individuals	NA	FALSE	FALSE	15429002	NA	TRUE	FALSE	NA	TRUE	NA
GCST90199944	Indolin-2-one levels	7,027 European ancestry individuals	NA	FALSE	FALSE	15380453	NA	TRUE	FALSE	NA	TRUE	NA
GCST90199945	Sphingomyelin (d18:1/14:0, d16:1/16:0) levels	8,254 European ancestry individuals	NA	FALSE	FALSE	15430478	NA	TRUE	FALSE	NA	TRUE	NA
GCST90199946	3-acetylphenol sulfate levels	6,897 European ancestry individuals	NA	FALSE	FALSE	15375123	NA	TRUE	FALSE	NA	TRUE	NA
GCST90199947	Sphingomyelin (d18:2/16:0, d18:1/16:1) levels	8,272 European ancestry individuals	NA	FALSE	FALSE	15431683	NA	TRUE	FALSE	NA	TRUE	NA
GCST90199948	S-allylcysteine levels	6,857 European ancestry individuals	NA	FALSE	FALSE	15375281	NA	TRUE	FALSE	NA	TRUE	NA
GCST90199949	6-oxopiperidine-2-carboxylate levels	8,032 European ancestry individuals	NA	FALSE	FALSE	15421411	NA	TRUE	FALSE	NA	TRUE	NA
GCST90199950	2-aminophenol sulfate levels	8,264 European ancestry individuals	NA	FALSE	FALSE	15430816	NA	TRUE	FALSE	NA	TRUE	NA
GCST90199951	N-acetylalliin levels	5,432 European ancestry individuals	NA	FALSE	FALSE	15277052	NA	TRUE	FALSE	NA	TRUE	NA
GCST90199952	2-aminoheptanoate levels	8,238 European ancestry individuals	NA	FALSE	FALSE	15431100	NA	TRUE	FALSE	NA	TRUE	NA
GCST90199953	3-methoxytyramine sulfate levels	5,419 European ancestry individuals	NA	FALSE	FALSE	15273345	NA	TRUE	FALSE	NA	TRUE	NA
GCST90199954	N2,N5-diacetylornithine levels	7,596 European ancestry individuals	NA	FALSE	FALSE	15404884	NA	TRUE	FALSE	NA	TRUE	NA
GCST90199955	Ferulic acid 4-sulfate levels	7,332 European ancestry individuals	NA	FALSE	FALSE	15394111	NA	TRUE	FALSE	NA	TRUE	NA
GCST90199956	1H-indole-7-acetic acid levels	5,986 European ancestry individuals	NA	FALSE	FALSE	15307250	NA	TRUE	FALSE	NA	TRUE	NA
GCST90199957	3-(3-hydroxyphenyl)propionate sulfate levels	5,773 European ancestry individuals	NA	FALSE	FALSE	15309763	NA	TRUE	FALSE	NA	TRUE	NA
GCST90199958	1-linolenoyl-GPC (18:3) levels	8,261 European ancestry individuals	NA	FALSE	FALSE	15431054	NA	TRUE	FALSE	NA	TRUE	NA
GCST90199959	O-sulfo-l-tyrosine levels	8,229 European ancestry individuals	NA	FALSE	FALSE	15430195	NA	TRUE	FALSE	NA	TRUE	NA
GCST90199960	N-formylanthranilic acid levels	7,534 European ancestry individuals	NA	FALSE	FALSE	15399447	NA	TRUE	FALSE	NA	TRUE	NA
GCST90199961	Methionine sulfone levels	8,254 European ancestry individuals	NA	FALSE	FALSE	15431252	NA	TRUE	FALSE	NA	TRUE	NA
GCST90199962	Acisoga levels	7,489 European ancestry individuals	NA	FALSE	FALSE	15404915	NA	TRUE	FALSE	NA	TRUE	NA
GCST90199963	17alpha-hydroxypregnanolone glucuronide levels	5,582 European ancestry individuals	NA	FALSE	FALSE	15290772	NA	TRUE	FALSE	NA	TRUE	NA
GCST90199964	Etiocholanolone glucuronide levels	7,821 European ancestry individuals	NA	FALSE	FALSE	15414026	NA	TRUE	FALSE	NA	TRUE	NA
GCST90199965	Fructosyllysine levels	8,238 European ancestry individuals	NA	FALSE	FALSE	15431064	NA	TRUE	FALSE	NA	TRUE	NA
GCST90199966	1-(1-enyl-oleoyl)-GPE (p-18:1) levels	8,157 European ancestry individuals	NA	FALSE	FALSE	15427549	NA	TRUE	FALSE	NA	TRUE	NA
GCST90199967	N-acetyltaurine levels	8,160 European ancestry individuals	NA	FALSE	FALSE	15427429	NA	TRUE	FALSE	NA	TRUE	NA
GCST90199968	1-palmitoyl-GPG (16:0) levels	7,708 European ancestry individuals	NA	FALSE	FALSE	15409398	NA	TRUE	FALSE	NA	TRUE	NA
GCST90199969	1-oleoyl-GPG (18:1) levels	6,990 European ancestry individuals	NA	FALSE	FALSE	15375966	NA	TRUE	FALSE	NA	TRUE	NA
GCST90199970	Octadecenedioylcarnitine (C18:1-DC) levels	8,245 European ancestry individuals	NA	FALSE	FALSE	15430827	NA	TRUE	FALSE	NA	TRUE	NA
GCST90199971	3-methylglutarylcarnitine (2) levels	8,220 European ancestry individuals	NA	FALSE	FALSE	15430292	NA	TRUE	FALSE	NA	TRUE	NA
GCST90199972	Sphingomyelin (d18:1/24:1, d18:2/24:0) levels	8,267 European ancestry individuals	NA	FALSE	FALSE	15431708	NA	TRUE	FALSE	NA	TRUE	NA
GCST90199973	Methyl glucopyranoside (alpha + beta) levels	7,973 European ancestry individuals	NA	FALSE	FALSE	15418296	NA	TRUE	FALSE	NA	TRUE	NA
GCST90199974	9-hydroxystearate levels	7,474 European ancestry individuals	NA	FALSE	FALSE	15401244	NA	TRUE	FALSE	NA	TRUE	NA
GCST90199975	Sphingomyelin (d18:2/14:0, d18:1/14:1) levels	8,278 European ancestry individuals	NA	FALSE	FALSE	15430038	NA	TRUE	FALSE	NA	TRUE	NA
GCST90199976	1-dihomo-linolenylglycerol (20:3) levels	6,470 European ancestry individuals	NA	FALSE	FALSE	15353404	NA	TRUE	FALSE	NA	TRUE	NA
GCST90199977	4-hydroxychlorothalonil levels	8,216 European ancestry individuals	NA	FALSE	FALSE	15430251	NA	TRUE	FALSE	NA	TRUE	NA
GCST90199978	Vanillactate levels	7,935 European ancestry individuals	NA	FALSE	FALSE	15419383	NA	TRUE	FALSE	NA	TRUE	NA
GCST90199979	Carnitine C14:1 levels	8,257 European ancestry individuals	NA	FALSE	FALSE	15431078	NA	TRUE	FALSE	NA	TRUE	NA
GCST90199980	N-formylphenylalanine levels	7,229 European ancestry individuals	NA	FALSE	FALSE	15387736	NA	TRUE	FALSE	NA	TRUE	NA
GCST90199981	2-acetamidophenol sulfate levels	6,984 European ancestry individuals	NA	FALSE	FALSE	15377656	NA	TRUE	FALSE	NA	TRUE	NA
GCST90199982	4-vinylguaiacol sulfate levels	7,592 European ancestry individuals	NA	FALSE	FALSE	15405634	NA	TRUE	FALSE	NA	TRUE	NA
GCST90199983	5alpha-androstan-3alpha,17beta-diol monosulfate (2) levels	5,920 European ancestry individuals	NA	FALSE	FALSE	15317561	NA	TRUE	FALSE	NA	TRUE	NA
GCST90199984	Vanillic alcohol sulfate levels	5,076 European ancestry individuals	NA	FALSE	FALSE	15243539	NA	TRUE	FALSE	NA	TRUE	NA
GCST90199985	Methyl-4-hydroxybenzoate sulfate levels	8,285 European ancestry individuals	NA	FALSE	FALSE	15431843	NA	TRUE	FALSE	NA	TRUE	NA
GCST90199986	Eugenol sulfate levels	7,063 European ancestry individuals	NA	FALSE	FALSE	15381589	NA	TRUE	FALSE	NA	TRUE	NA
GCST90199987	2-methoxyresorcinol sulfate levels	5,897 European ancestry individuals	NA	FALSE	FALSE	15304257	NA	TRUE	FALSE	NA	TRUE	NA
GCST90199988	Tyramine O-sulfate levels	7,254 European ancestry individuals	NA	FALSE	FALSE	15392599	NA	TRUE	FALSE	NA	TRUE	NA
GCST90199989	4-methylguaiacol sulfate levels	7,141 European ancestry individuals	NA	FALSE	FALSE	15383146	NA	TRUE	FALSE	NA	TRUE	NA
GCST90199990	3-hydroxypyridine sulfate levels	8,270 European ancestry individuals	NA	FALSE	FALSE	15429916	NA	TRUE	FALSE	NA	TRUE	NA
GCST90199991	Arabonate/xylonate levels	8,211 European ancestry individuals	NA	FALSE	FALSE	15428906	NA	TRUE	FALSE	NA	TRUE	NA
GCST90199992	Octadecanedioylcarnitine (C18-DC) levels	8,049 European ancestry individuals	NA	FALSE	FALSE	15419517	NA	TRUE	FALSE	NA	TRUE	NA
GCST90199993	Phenylacetylcarnitine levels	8,127 European ancestry individuals	NA	FALSE	FALSE	15427459	NA	TRUE	FALSE	NA	TRUE	NA
GCST90199994	Ethylparaben sulfate levels	6,408 European ancestry individuals	NA	FALSE	FALSE	15351954	NA	TRUE	FALSE	NA	TRUE	NA
GCST90199995	Sphingomyelin (d18:1/20:2, d18:2/20:1, d16:1/22:2) levels	8,124 European ancestry individuals	NA	FALSE	FALSE	15424003	NA	TRUE	FALSE	NA	TRUE	NA
GCST90199996	Sphingomyelin (d18:1/20:1, d18:2/20:0) levels	8,255 European ancestry individuals	NA	FALSE	FALSE	15430900	NA	TRUE	FALSE	NA	TRUE	NA
GCST90199997	Behenoyl sphingomyelin (d18:1/22:0) levels	8,260 European ancestry individuals	NA	FALSE	FALSE	15431366	NA	TRUE	FALSE	NA	TRUE	NA
GCST90199998	Propyl 4-hydroxybenzoate sulfate levels	7,855 European ancestry individuals	NA	FALSE	FALSE	15416003	NA	TRUE	FALSE	NA	TRUE	NA
GCST90199999	4-methoxyphenol sulfate levels	7,500 European ancestry individuals	NA	FALSE	FALSE	15396109	NA	TRUE	FALSE	NA	TRUE	NA
GCST90200000	Umbelliferone sulfate levels	5,598 European ancestry individuals	NA	FALSE	FALSE	15287543	NA	TRUE	FALSE	NA	TRUE	NA
GCST90200001	Sphingomyelin (d18:1/20:0, d16:1/22:0) levels	8,257 European ancestry individuals	NA	FALSE	FALSE	15431025	NA	TRUE	FALSE	NA	TRUE	NA
GCST90200002	6-hydroxyindole sulfate levels	8,229 European ancestry individuals	NA	FALSE	FALSE	15430483	NA	TRUE	FALSE	NA	TRUE	NA
GCST90200003	P-cresol glucuronide levels	7,969 European ancestry individuals	NA	FALSE	FALSE	15418417	NA	TRUE	FALSE	NA	TRUE	NA
GCST90200004	N-carbamoylalanine levels	7,315 European ancestry individuals	NA	FALSE	FALSE	15394286	NA	TRUE	FALSE	NA	TRUE	NA
GCST90200005	Citraconate/glutaconate levels	8,263 European ancestry individuals	NA	FALSE	FALSE	15431001	NA	TRUE	FALSE	NA	TRUE	NA
GCST90200006	1,2,3-benzenetriol sulfate (2) levels	7,484 European ancestry individuals	NA	FALSE	FALSE	15402971	NA	TRUE	FALSE	NA	TRUE	NA
GCST90200007	3-methoxycatechol sulfate (2) levels	7,286 European ancestry individuals	NA	FALSE	FALSE	15388009	NA	TRUE	FALSE	NA	TRUE	NA
GCST90200008	C-glycosyltryptophan levels	8,204 European ancestry individuals	NA	FALSE	FALSE	15429210	NA	TRUE	FALSE	NA	TRUE	NA
GCST90200009	3-methoxycatechol sulfate (1) levels	8,194 European ancestry individuals	NA	FALSE	FALSE	15428582	NA	TRUE	FALSE	NA	TRUE	NA
GCST90200010	Sphingomyelin (d18:1/22:1, d18:2/22:0, d16:1/24:1) levels	8,246 European ancestry individuals	NA	FALSE	FALSE	15430938	NA	TRUE	FALSE	NA	TRUE	NA
GCST90200011	Arabitol/xylitol levels	8,219 European ancestry individuals	NA	FALSE	FALSE	15430375	NA	TRUE	FALSE	NA	TRUE	NA
GCST90200012	3-hydroxyhexanoate levels	8,268 European ancestry individuals	NA	FALSE	FALSE	15431449	NA	TRUE	FALSE	NA	TRUE	NA
GCST90200013	Sphingomyelin (d18:1/22:2, d18:2/22:1, d16:1/24:2) levels	8,267 European ancestry individuals	NA	FALSE	FALSE	15429958	NA	TRUE	FALSE	NA	TRUE	NA
GCST90200014	3beta-hydroxy-5-cholestenoate levels	8,259 European ancestry individuals	NA	FALSE	FALSE	15430844	NA	TRUE	FALSE	NA	TRUE	NA
GCST90200015	N-acetylkynurenine (2) levels	6,193 European ancestry individuals	NA	FALSE	FALSE	15336781	NA	TRUE	FALSE	NA	TRUE	NA
GCST90200016	Dopamine 4-sulfate levels	6,888 European ancestry individuals	NA	FALSE	FALSE	15369218	NA	TRUE	FALSE	NA	TRUE	NA
GCST90200017	Sphingomyelin (d17:1/16:0, d18:1/15:0, d16:1/17:0) levels	8,261 European ancestry individuals	NA	FALSE	FALSE	15431258	NA	TRUE	FALSE	NA	TRUE	NA
GCST90200018	Adipoylcarnitine (C6-DC) levels	8,216 European ancestry individuals	NA	FALSE	FALSE	15429676	NA	TRUE	FALSE	NA	TRUE	NA
GCST90200019	Dopamine 3-o-sulfate levels	8,252 European ancestry individuals	NA	FALSE	FALSE	15430594	NA	TRUE	FALSE	NA	TRUE	NA
GCST90200020	Lignoceroyl sphingomyelin (d18:1/24:0) levels	8,250 European ancestry individuals	NA	FALSE	FALSE	15430515	NA	TRUE	FALSE	NA	TRUE	NA
GCST90200021	N-acetylglucosamine/n-acetylgalactosamine levels	7,940 European ancestry individuals	NA	FALSE	FALSE	15418535	NA	TRUE	FALSE	NA	TRUE	NA
GCST90200022	Glycochenodeoxycholate 3-sulfate levels	8,123 European ancestry individuals	NA	FALSE	FALSE	15426716	NA	TRUE	FALSE	NA	TRUE	NA
GCST90200023	Trans 3,4-methyleneheptanoate levels	7,104 European ancestry individuals	NA	FALSE	FALSE	15377766	NA	TRUE	FALSE	NA	TRUE	NA
GCST90200024	Taurodeoxycholic acid 3-sulfate levels	7,333 European ancestry individuals	NA	FALSE	FALSE	15392995	NA	TRUE	FALSE	NA	TRUE	NA
GCST90200025	Phenol glucuronide levels	4,466 European ancestry individuals	NA	FALSE	FALSE	15440006	NA	TRUE	FALSE	NA	TRUE	NA
GCST90200026	Glycodeoxycholate 3-sulfate levels	8,066 European ancestry individuals	NA	FALSE	FALSE	15424550	NA	TRUE	FALSE	NA	TRUE	NA
GCST90200027	4-hydroxyphenylacetoylcarnitine levels	7,523 European ancestry individuals	NA	FALSE	FALSE	15401033	NA	TRUE	FALSE	NA	TRUE	NA
GCST90200028	1-stearoyl-2-oleoyl-gpc (18:0/18:1) levels	8,257 European ancestry individuals	NA	FALSE	FALSE	15431210	NA	TRUE	FALSE	NA	TRUE	NA
GCST90200029	Linoleoyl ethanolamide levels	7,214 European ancestry individuals	NA	FALSE	FALSE	15387034	NA	TRUE	FALSE	NA	TRUE	NA
GCST90200030	1,2-dilinoleoyl-GPC (18:2/18:2) levels	8,227 European ancestry individuals	NA	FALSE	FALSE	15429706	NA	TRUE	FALSE	NA	TRUE	NA
GCST90200031	Nonanoylcarnitine (C9) levels	7,669 European ancestry individuals	NA	FALSE	FALSE	15404847	NA	TRUE	FALSE	NA	TRUE	NA
GCST90200032	2-hydroxybutyrate/2-hydroxyisobutyrate levels	8,215 European ancestry individuals	NA	FALSE	FALSE	15429552	NA	TRUE	FALSE	NA	TRUE	NA
GCST90200033	Sphingomyelin (d18:2/23:0, d18:1/23:1, d17:1/24:1) levels	8,272 European ancestry individuals	NA	FALSE	FALSE	15431560	NA	TRUE	FALSE	NA	TRUE	NA
GCST90200034	Tricosanoyl sphingomyelin (d18:1/23:0) levels	8,257 European ancestry individuals	NA	FALSE	FALSE	15431194	NA	TRUE	FALSE	NA	TRUE	NA
GCST90200035	Palmitoyl dihydrosphingomyelin (d18:0/16:0) levels	8,269 European ancestry individuals	NA	FALSE	FALSE	15431483	NA	TRUE	FALSE	NA	TRUE	NA
GCST90200036	1-palmitoleoylglycerol (16:1) levels	6,432 European ancestry individuals	NA	FALSE	FALSE	15349947	NA	TRUE	FALSE	NA	TRUE	NA
GCST90200037	1-stearoyl-2-linoleoyl-gpc (18:0/18:2) levels	8,231 European ancestry individuals	NA	FALSE	FALSE	15430318	NA	TRUE	FALSE	NA	TRUE	NA
GCST90200038	1-palmitoyl-2-palmitoleoyl-gpc (16:0/16:1) levels	8,276 European ancestry individuals	NA	FALSE	FALSE	15431403	NA	TRUE	FALSE	NA	TRUE	NA
GCST90200039	1-stearoyl-2-linoleoyl-GPE (18:0/18:2) levels	8,241 European ancestry individuals	NA	FALSE	FALSE	15429878	NA	TRUE	FALSE	NA	TRUE	NA
GCST90200040	Sphingomyelin (d18:2/24:1, d18:1/24:2) levels	8,273 European ancestry individuals	NA	FALSE	FALSE	15431628	NA	TRUE	FALSE	NA	TRUE	NA
GCST90200041	1-palmitoyl-2-stearoyl-gpc (16:0/18:0) levels	8,271 European ancestry individuals	NA	FALSE	FALSE	15431169	NA	TRUE	FALSE	NA	TRUE	NA
GCST90200042	Oleate/vaccenate (18:1) levels	8,230 European ancestry individuals	NA	FALSE	FALSE	15430410	NA	TRUE	FALSE	NA	TRUE	NA
GCST90200043	1-palmitoyl-2-docosahexaenoyl-gpc (16:0/22:6) levels	8,256 European ancestry individuals	NA	FALSE	FALSE	15431316	NA	TRUE	FALSE	NA	TRUE	NA
GCST90200044	1-(1-enyl-stearoyl)-2-oleoyl-GPE (p-18:0/18:1) levels	8,258 European ancestry individuals	NA	FALSE	FALSE	15430076	NA	TRUE	FALSE	NA	TRUE	NA
GCST90200045	1-stearoyl-2-arachidonoyl-GPE (18:0/20:4) levels	8,259 European ancestry individuals	NA	FALSE	FALSE	15431025	NA	TRUE	FALSE	NA	TRUE	NA
GCST90200046	1-stearoyl-2-docosahexaenoyl-gpc (18:0/22:6) levels	8,257 European ancestry individuals	NA	FALSE	FALSE	15431524	NA	TRUE	FALSE	NA	TRUE	NA
GCST90200047	Sphingomyelin (d18:1/17:0, d17:1/18:0, d19:1/16:0) levels	8,252 European ancestry individuals	NA	FALSE	FALSE	15430376	NA	TRUE	FALSE	NA	TRUE	NA
GCST90200048	1-(1-enyl-palmitoyl)-2-arachidonoyl-GPE (p-16:0/20:4) levels	8,262 European ancestry individuals	NA	FALSE	FALSE	15431453	NA	TRUE	FALSE	NA	TRUE	NA
GCST90200049	Myristoyl dihydrosphingomyelin (d18:0/14:0) levels	8,254 European ancestry individuals	NA	FALSE	FALSE	15429009	NA	TRUE	FALSE	NA	TRUE	NA
GCST90200050	5-hydroxyindole sulfate levels	6,163 European ancestry individuals	NA	FALSE	FALSE	15329137	NA	TRUE	FALSE	NA	TRUE	NA
GCST90200051	1-palmitoyl-2-dihomo-linolenoyl-GPC (16:0/20:3n3 or 6) levels	8,230 European ancestry individuals	NA	FALSE	FALSE	15430256	NA	TRUE	FALSE	NA	TRUE	NA
GCST90200052	1-(1-enyl-palmitoyl)-2-arachidonoyl-gpc (p-16:0/20:4) levels	8,251 European ancestry individuals	NA	FALSE	FALSE	15430672	NA	TRUE	FALSE	NA	TRUE	NA
GCST90200053	Sphingomyelin (d18:1/21:0, d17:1/22:0, d16:1/23:0) levels	8,242 European ancestry individuals	NA	FALSE	FALSE	15430595	NA	TRUE	FALSE	NA	TRUE	NA
GCST90200054	1-palmitoyl-2-arachidonoyl-GPE (16:0/20:4) levels	8,257 European ancestry individuals	NA	FALSE	FALSE	15431122	NA	TRUE	FALSE	NA	TRUE	NA
GCST90200055	Lactosyl-N-palmitoyl-sphingosine (d18:1/16:0) levels	8,266 European ancestry individuals	NA	FALSE	FALSE	15430303	NA	TRUE	FALSE	NA	TRUE	NA
GCST90200056	Sphingomyelin (d18:0/18:0, d19:0/17:0) levels	8,274 European ancestry individuals	NA	FALSE	FALSE	15431292	NA	TRUE	FALSE	NA	TRUE	NA
GCST90200057	1-(1-enyl-palmitoyl)-2-oleoyl-gpc (p-16:0/18:1) levels	8,222 European ancestry individuals	NA	FALSE	FALSE	15428569	NA	TRUE	FALSE	NA	TRUE	NA
GCST90200058	1-(1-enyl-stearoyl)-2-arachidonoyl-GPE (p-18:0/20:4) levels	8,254 European ancestry individuals	NA	FALSE	FALSE	15430980	NA	TRUE	FALSE	NA	TRUE	NA
GCST90200059	Behenoyl dihydrosphingomyelin (d18:0/22:0) levels	8,275 European ancestry individuals	NA	FALSE	FALSE	15430995	NA	TRUE	FALSE	NA	TRUE	NA
GCST90200060	1-(1-enyl-palmitoyl)-2-linoleoyl-GPC (p-16:0/18:2) levels	8,260 European ancestry individuals	NA	FALSE	FALSE	15431225	NA	TRUE	FALSE	NA	TRUE	NA
GCST90200061	1-(1-enyl-palmitoyl)-2-oleoyl-GPE (p-16:0/18:1) levels	8,264 European ancestry individuals	NA	FALSE	FALSE	15431701	NA	TRUE	FALSE	NA	TRUE	NA
GCST90200062	1-palmitoyl-2-arachidonoyl-GPI (16:0/20:4) levels	8,057 European ancestry individuals	NA	FALSE	FALSE	15422666	NA	TRUE	FALSE	NA	TRUE	NA
GCST90200063	1-palmitoyl-2-docosahexaenoyl-GPE (16:0/22:6) levels	8,262 European ancestry individuals	NA	FALSE	FALSE	15431281	NA	TRUE	FALSE	NA	TRUE	NA
GCST90200064	N-palmitoyl-sphinganine (d18:0/16:0) levels	8,208 European ancestry individuals	NA	FALSE	FALSE	15428195	NA	TRUE	FALSE	NA	TRUE	NA
GCST90200065	1-stearoyl-2-docosahexaenoyl-GPE (18:0/22:6) levels	8,251 European ancestry individuals	NA	FALSE	FALSE	15430237	NA	TRUE	FALSE	NA	TRUE	NA
GCST90200066	Gamma-tocopherol/beta-tocopherol levels	8,231 European ancestry individuals	NA	FALSE	FALSE	15430879	NA	TRUE	FALSE	NA	TRUE	NA
GCST90200067	1-stearoyl-2-linoleoyl-GPI (18:0/18:2) levels	8,113 European ancestry individuals	NA	FALSE	FALSE	15424629	NA	TRUE	FALSE	NA	TRUE	NA
GCST90200068	1,2-dilinoleoyl-GPE (18:2/18:2) levels	6,804 European ancestry individuals	NA	FALSE	FALSE	15363737	NA	TRUE	FALSE	NA	TRUE	NA
GCST90200069	Phenylacetylglutamate levels	6,227 European ancestry individuals	NA	FALSE	FALSE	15326869	NA	TRUE	FALSE	NA	TRUE	NA
GCST90200070	1-(1-enyl-palmitoyl)-2-palmitoleoyl-GPC (P-16:0/16:1) levels	8,083 European ancestry individuals	NA	FALSE	FALSE	15423320	NA	TRUE	FALSE	NA	TRUE	NA
GCST90200071	Palmitoylcholine levels	8,209 European ancestry individuals	NA	FALSE	FALSE	15429651	NA	TRUE	FALSE	NA	TRUE	NA
GCST90200072	Thioproline levels	8,226 European ancestry individuals	NA	FALSE	FALSE	15429964	NA	TRUE	FALSE	NA	TRUE	NA
GCST90200073	1-linoleoyl-2-arachidonoyl-GPC (18:2/20:4n6) levels	8,063 European ancestry individuals	NA	FALSE	FALSE	15424604	NA	TRUE	FALSE	NA	TRUE	NA
GCST90200074	1-linoleoyl-GPG (18:2) levels	8,115 European ancestry individuals	NA	FALSE	FALSE	15425683	NA	TRUE	FALSE	NA	TRUE	NA
GCST90200075	1-(1-enyl-palmitoyl)-2-linoleoyl-GPE (p-16:0/18:2) levels	8,254 European ancestry individuals	NA	FALSE	FALSE	15431313	NA	TRUE	FALSE	NA	TRUE	NA
GCST90200076	1-(1-enyl-stearoyl)-2-linoleoyl-GPE (p-18:0/18:2) levels	8,261 European ancestry individuals	NA	FALSE	FALSE	15431332	NA	TRUE	FALSE	NA	TRUE	NA
GCST90200077	1-stearoyl-2-oleoyl-GPI (18:0/18:1) levels	8,111 European ancestry individuals	NA	FALSE	FALSE	15423688	NA	TRUE	FALSE	NA	TRUE	NA
GCST90200078	1-myristoyl-2-arachidonoyl-GPC (14:0/20:4) levels	8,264 European ancestry individuals	NA	FALSE	FALSE	15431143	NA	TRUE	FALSE	NA	TRUE	NA
GCST90200079	1-oleoyl-2-arachidonoyl-GPE (18:1/20:4) levels	8,121 European ancestry individuals	NA	FALSE	FALSE	15426002	NA	TRUE	FALSE	NA	TRUE	NA
GCST90200080	1-palmitoyl-2-oleoyl-GPI (16:0/18:1) levels	8,123 European ancestry individuals	NA	FALSE	FALSE	15425447	NA	TRUE	FALSE	NA	TRUE	NA
GCST90200081	1-oleoyl-2-docosahexaenoyl-GPC (18:1/22:6) levels	8,267 European ancestry individuals	NA	FALSE	FALSE	15431184	NA	TRUE	FALSE	NA	TRUE	NA
GCST90200082	1-oleoyl-2-linoleoyl-GPE (18:1/18:2) levels	8,205 European ancestry individuals	NA	FALSE	FALSE	15428662	NA	TRUE	FALSE	NA	TRUE	NA
GCST90200083	1-(1-enyl-palmitoyl)-2-palmitoyl-GPC (P-16:0/16:0) levels	8,266 European ancestry individuals	NA	FALSE	FALSE	15431146	NA	TRUE	FALSE	NA	TRUE	NA
GCST90200084	Oleoylcholine levels	8,120 European ancestry individuals	NA	FALSE	FALSE	15424015	NA	TRUE	FALSE	NA	TRUE	NA
GCST90200085	Glycosyl-N-palmitoyl-sphingosine (d18:1/16:0) levels	8,245 European ancestry individuals	NA	FALSE	FALSE	15430731	NA	TRUE	FALSE	NA	TRUE	NA
GCST90200086	Arachidonoylcholine levels	8,170 European ancestry individuals	NA	FALSE	FALSE	15427542	NA	TRUE	FALSE	NA	TRUE	NA
GCST90200087	2-methylserine levels	7,722 European ancestry individuals	NA	FALSE	FALSE	15410215	NA	TRUE	FALSE	NA	TRUE	NA
GCST90200088	(S)-3-hydroxybutyrylcarnitine levels	8,249 European ancestry individuals	NA	FALSE	FALSE	15431309	NA	TRUE	FALSE	NA	TRUE	NA
GCST90200089	Methylsuccinoylcarnitine levels	8,004 European ancestry individuals	NA	FALSE	FALSE	15419240	NA	TRUE	FALSE	NA	TRUE	NA
GCST90200090	Dihomo-linolenoyl-choline levels	6,954 European ancestry individuals	NA	FALSE	FALSE	15372795	NA	TRUE	FALSE	NA	TRUE	NA
GCST90200091	Docosahexaenoylcholine levels	7,440 European ancestry individuals	NA	FALSE	FALSE	15396217	NA	TRUE	FALSE	NA	TRUE	NA
GCST90200092	Glycocholate glucuronide (1) levels	4,381 European ancestry individuals	NA	FALSE	FALSE	15426191	NA	TRUE	FALSE	NA	TRUE	NA
GCST90200093	Caffeic acid sulfate levels	7,798 European ancestry individuals	NA	FALSE	FALSE	15411818	NA	TRUE	FALSE	NA	TRUE	NA
GCST90200094	Ascorbic acid 2-sulfate levels	8,089 European ancestry individuals	NA	FALSE	FALSE	15424875	NA	TRUE	FALSE	NA	TRUE	NA
GCST90200095	1-linoleoyl-2-linolenoyl-GPC (18:2/18:3) levels	8,188 European ancestry individuals	NA	FALSE	FALSE	15428679	NA	TRUE	FALSE	NA	TRUE	NA
GCST90200096	Catechol glucuronide levels	4,698 European ancestry individuals	NA	FALSE	FALSE	15443742	NA	TRUE	FALSE	NA	TRUE	NA
GCST90200097	Furaneol sulfate levels	5,882 European ancestry individuals	NA	FALSE	FALSE	15307099	NA	TRUE	FALSE	NA	TRUE	NA
GCST90200098	Ceramide (d18:1/24:1) levels	8,265 European ancestry individuals	NA	FALSE	FALSE	15431242	NA	TRUE	FALSE	NA	TRUE	NA
GCST90200099	N-oleoylserine levels	7,591 European ancestry individuals	NA	FALSE	FALSE	15403094	NA	TRUE	FALSE	NA	TRUE	NA
GCST90200100	Perfluorooctanesulfonate (PFOS) levels	8,218 European ancestry individuals	NA	FALSE	FALSE	15430460	NA	TRUE	FALSE	NA	TRUE	NA
GCST90200101	Pimeloylcarnitine/3-methyladipoylcarnitine (C7-DC) levels	7,837 European ancestry individuals	NA	FALSE	FALSE	15413386	NA	TRUE	FALSE	NA	TRUE	NA
GCST90200102	1-palmitoleoyl-2-linolenoyl-GPC (16:1/18:3) levels	7,540 European ancestry individuals	NA	FALSE	FALSE	15401733	NA	TRUE	FALSE	NA	TRUE	NA
GCST90200103	Linoleoyl-arachidonoyl-glycerol (18:2/20:4) [1] levels	7,731 European ancestry individuals	NA	FALSE	FALSE	15406515	NA	TRUE	FALSE	NA	TRUE	NA
GCST90200104	Hexadecadienoate (16:2n6) levels	8,274 European ancestry individuals	NA	FALSE	FALSE	15431231	NA	TRUE	FALSE	NA	TRUE	NA
GCST90200105	Glycosyl-N-behenoyl-sphingadienine (d18:2/22:0) levels	8,232 European ancestry individuals	NA	FALSE	FALSE	15429546	NA	TRUE	FALSE	NA	TRUE	NA
GCST90200106	4-hydroxyphenylacetylglutamine levels	7,752 European ancestry individuals	NA	FALSE	FALSE	15413916	NA	TRUE	FALSE	NA	TRUE	NA
GCST90200107	Gamma-glutamyl-alpha-lysine levels	8,250 European ancestry individuals	NA	FALSE	FALSE	15430744	NA	TRUE	FALSE	NA	TRUE	NA
GCST90200108	N-palmitoyl-sphingadienine (d18:2/16:0) levels	7,805 European ancestry individuals	NA	FALSE	FALSE	15411861	NA	TRUE	FALSE	NA	TRUE	NA
GCST90200109	Linoleoyl-arachidonoyl-glycerol (18:2/20:4) [2] levels	7,744 European ancestry individuals	NA	FALSE	FALSE	15408090	NA	TRUE	FALSE	NA	TRUE	NA
GCST90200110	Palmitoleoylcarnitine (C16:1) levels	8,263 European ancestry individuals	NA	FALSE	FALSE	15431080	NA	TRUE	FALSE	NA	TRUE	NA
GCST90200111	N-stearoyl-sphingadienine (d18:2/18:0) levels	7,229 European ancestry individuals	NA	FALSE	FALSE	15385376	NA	TRUE	FALSE	NA	TRUE	NA
GCST90200112	2,3-dihydroxy-2-methylbutyrate levels	8,018 European ancestry individuals	NA	FALSE	FALSE	15420922	NA	TRUE	FALSE	NA	TRUE	NA
GCST90200113	Stearoylcholine levels	7,140 European ancestry individuals	NA	FALSE	FALSE	15382261	NA	TRUE	FALSE	NA	TRUE	NA
GCST90200114	Glycosyl-N-tricosanoyl-sphingadienine (d18:2/23:0) levels	7,274 European ancestry individuals	NA	FALSE	FALSE	15391817	NA	TRUE	FALSE	NA	TRUE	NA
GCST90200115	N-palmitoyl-heptadecasphingosine (d17:1/16:0) levels	7,141 European ancestry individuals	NA	FALSE	FALSE	15384116	NA	TRUE	FALSE	NA	TRUE	NA
GCST90200116	Ceramide (d18:1/14:0, d16:1/16:0) levels	7,270 European ancestry individuals	NA	FALSE	FALSE	15389419	NA	TRUE	FALSE	NA	TRUE	NA
GCST90200117	Glycosyl-N-(2-hydroxynervonoyl)-sphingosine (d18:1/24:1(2OH)) levels	8,012 European ancestry individuals	NA	FALSE	FALSE	15423184	NA	TRUE	FALSE	NA	TRUE	NA
GCST90200118	Glycosyl ceramide (d18:2/24:1, d18:1/24:2) levels	8,251 European ancestry individuals	NA	FALSE	FALSE	15430906	NA	TRUE	FALSE	NA	TRUE	NA
GCST90200119	Glycosyl ceramide (d18:1/23:1, d17:1/24:1) levels	5,309 European ancestry individuals	NA	FALSE	FALSE	15269795	NA	TRUE	FALSE	NA	TRUE	NA
GCST90200120	Sphingadienine levels	4,533 European ancestry individuals	NA	FALSE	FALSE	15446803	NA	TRUE	FALSE	NA	TRUE	NA
GCST90200121	Ceramide (d18:1/17:0, d17:1/18:0) levels	6,073 European ancestry individuals	NA	FALSE	FALSE	15328761	NA	TRUE	FALSE	NA	TRUE	NA
GCST90200122	Nisinate (24:6n3) levels	4,765 European ancestry individuals	NA	FALSE	FALSE	15448045	NA	TRUE	FALSE	NA	TRUE	NA
GCST90200123	Sphingomyelin (d18:0/20:0, d16:0/22:0) levels	8,277 European ancestry individuals	NA	FALSE	FALSE	15431391	NA	TRUE	FALSE	NA	TRUE	NA
GCST90200124	Sphingomyelin (d18:2/24:2) levels	8,140 European ancestry individuals	NA	FALSE	FALSE	15425672	NA	TRUE	FALSE	NA	TRUE	NA
GCST90200125	Sphingomyelin (d17:2/16:0, d18:2/15:0) levels	8,264 European ancestry individuals	NA	FALSE	FALSE	15431498	NA	TRUE	FALSE	NA	TRUE	NA
GCST90200126	Sphingomyelin (d18:2/23:1) levels	8,267 European ancestry individuals	NA	FALSE	FALSE	15431692	NA	TRUE	FALSE	NA	TRUE	NA
GCST90200127	Behenoylcarnitine (C22) levels	7,368 European ancestry individuals	NA	FALSE	FALSE	15390084	NA	TRUE	FALSE	NA	TRUE	NA
GCST90200128	Sphingomyelin (d18:2/18:1) levels	8,253 European ancestry individuals	NA	FALSE	FALSE	15431191	NA	TRUE	FALSE	NA	TRUE	NA
GCST90200129	Sphingomyelin (d18:2/21:0, d16:2/23:0) levels	8,260 European ancestry individuals	NA	FALSE	FALSE	15431255	NA	TRUE	FALSE	NA	TRUE	NA
GCST90200130	Linoleoylcholine levels	8,193 European ancestry individuals	NA	FALSE	FALSE	15426246	NA	TRUE	FALSE	NA	TRUE	NA
GCST90200131	Sphingomyelin (d18:1/19:0, d19:1/18:0) levels	8,256 European ancestry individuals	NA	FALSE	FALSE	15431171	NA	TRUE	FALSE	NA	TRUE	NA
GCST90200132	Linolenoylcarnitine (C18:3) levels	8,195 European ancestry individuals	NA	FALSE	FALSE	15427686	NA	TRUE	FALSE	NA	TRUE	NA
GCST90200133	Heneicosapentaenoate (21:5n3) levels	4,827 European ancestry individuals	NA	FALSE	FALSE	15452313	NA	TRUE	FALSE	NA	TRUE	NA
GCST90200134	Sphingomyelin (d18:1/25:0, d19:0/24:1, d20:1/23:0, d19:1/24:0) levels	8,126 European ancestry individuals	NA	FALSE	FALSE	15424672	NA	TRUE	FALSE	NA	TRUE	NA
GCST90200135	Arachidoylcarnitine (C20) levels	7,682 European ancestry individuals	NA	FALSE	FALSE	15405219	NA	TRUE	FALSE	NA	TRUE	NA
GCST90200136	Cerotoylcarnitine (C26) levels	8,266 European ancestry individuals	NA	FALSE	FALSE	15430482	NA	TRUE	FALSE	NA	TRUE	NA
GCST90200137	Lignoceroylcarnitine (C24) levels	8,238 European ancestry individuals	NA	FALSE	FALSE	15430566	NA	TRUE	FALSE	NA	TRUE	NA
GCST90200138	Docosatrienoate (22:3n6) levels	5,398 European ancestry individuals	NA	FALSE	FALSE	15275072	NA	TRUE	FALSE	NA	TRUE	NA
GCST90200139	Dihomo-linolenoylcarnitine (C20:3n3 or 6) levels	8,092 European ancestry individuals	NA	FALSE	FALSE	15423971	NA	TRUE	FALSE	NA	TRUE	NA
GCST90200140	Carotene diol (2) levels	8,196 European ancestry individuals	NA	FALSE	FALSE	15429122	NA	TRUE	FALSE	NA	TRUE	NA
GCST90200141	Ethyl alpha-glucopyranoside levels	6,620 European ancestry individuals	NA	FALSE	FALSE	15351808	NA	TRUE	FALSE	NA	TRUE	NA
GCST90200142	Carotene diol (1) levels	8,256 European ancestry individuals	NA	FALSE	FALSE	15430820	NA	TRUE	FALSE	NA	TRUE	NA
GCST90200143	Nervonoylcarnitine (C24:1) levels	7,880 European ancestry individuals	NA	FALSE	FALSE	15414905	NA	TRUE	FALSE	NA	TRUE	NA
GCST90200144	Dihomo-linoleoylcarnitine (C20:2) levels	7,887 European ancestry individuals	NA	FALSE	FALSE	15416363	NA	TRUE	FALSE	NA	TRUE	NA
GCST90200145	Glycosyl ceramide (d18:1/20:0, d16:1/22:0) levels	8,259 European ancestry individuals	NA	FALSE	FALSE	15431552	NA	TRUE	FALSE	NA	TRUE	NA
GCST90200146	Docosahexaenoylcarnitine (C22:6) levels	6,287 European ancestry individuals	NA	FALSE	FALSE	15330077	NA	TRUE	FALSE	NA	TRUE	NA
GCST90200147	N,N,N-trimethyl-5-aminovalerate levels	8,214 European ancestry individuals	NA	FALSE	FALSE	15429917	NA	TRUE	FALSE	NA	TRUE	NA
GCST90200148	Eicosenoylcarnitine (C20:1) levels	8,145 European ancestry individuals	NA	FALSE	FALSE	15425762	NA	TRUE	FALSE	NA	TRUE	NA
GCST90200149	Ximenoylcarnitine (C26:1) levels	8,260 European ancestry individuals	NA	FALSE	FALSE	15429967	NA	TRUE	FALSE	NA	TRUE	NA
GCST90200150	Arachidonoylcarnitine (C20:4) levels	8,202 European ancestry individuals	NA	FALSE	FALSE	15429683	NA	TRUE	FALSE	NA	TRUE	NA
GCST90200151	5-dodecenoylcarnitine (C12:1) levels	7,899 European ancestry individuals	NA	FALSE	FALSE	15419180	NA	TRUE	FALSE	NA	TRUE	NA
GCST90200152	2-butenoylglycine levels	6,253 European ancestry individuals	NA	FALSE	FALSE	15330859	NA	TRUE	FALSE	NA	TRUE	NA
GCST90200153	(N(1) + N(8))-acetylspermidine levels	8,219 European ancestry individuals	NA	FALSE	FALSE	15430447	NA	TRUE	FALSE	NA	TRUE	NA
GCST90200154	Hydroxy-cmpf levels	8,254 European ancestry individuals	NA	FALSE	FALSE	15430070	NA	TRUE	FALSE	NA	TRUE	NA
GCST90200155	2-furoylcarnitine levels	6,448 European ancestry individuals	NA	FALSE	FALSE	15344960	NA	TRUE	FALSE	NA	TRUE	NA
GCST90200156	Cortolone glucuronide (1) levels	8,152 European ancestry individuals	NA	FALSE	FALSE	15428140	NA	TRUE	FALSE	NA	TRUE	NA
GCST90200157	Carotene diol (3) levels	7,650 European ancestry individuals	NA	FALSE	FALSE	15402965	NA	TRUE	FALSE	NA	TRUE	NA
GCST90200158	3-hydroxyoleoylcarnitine levels	7,532 European ancestry individuals	NA	FALSE	FALSE	15401806	NA	TRUE	FALSE	NA	TRUE	NA
GCST90200159	Dodecenedioate (C12:1-DC) levels	8,217 European ancestry individuals	NA	FALSE	FALSE	15430050	NA	TRUE	FALSE	NA	TRUE	NA
GCST90200160	Trans-2-hexenoylglycine levels	6,545 European ancestry individuals	NA	FALSE	FALSE	15350543	NA	TRUE	FALSE	NA	TRUE	NA
GCST90200161	2-hydroxyarachidate levels	8,170 European ancestry individuals	NA	FALSE	FALSE	15428087	NA	TRUE	FALSE	NA	TRUE	NA
GCST90200162	3-hydroxyphenylacetoylglutamine levels	5,371 European ancestry individuals	NA	FALSE	FALSE	15273995	NA	TRUE	FALSE	NA	TRUE	NA
GCST90200163	Heptenedioate (C7:1-DC) levels	8,128 European ancestry individuals	NA	FALSE	FALSE	15426621	NA	TRUE	FALSE	NA	TRUE	NA
GCST90200164	Hexadecenedioate (C16:1-DC) levels	8,248 European ancestry individuals	NA	FALSE	FALSE	15431113	NA	TRUE	FALSE	NA	TRUE	NA
GCST90200165	Octadecenedioate (C18:1-DC) levels	8,267 European ancestry individuals	NA	FALSE	FALSE	15431706	NA	TRUE	FALSE	NA	TRUE	NA
GCST90200166	Dihydroferulic acid sulfate levels	5,188 European ancestry individuals	NA	FALSE	FALSE	15256209	NA	TRUE	FALSE	NA	TRUE	NA
GCST90200167	Glutamine conjugate of C7H12O2 levels	7,881 European ancestry individuals	NA	FALSE	FALSE	15417029	NA	TRUE	FALSE	NA	TRUE	NA
GCST90200168	Hydroxyasparagine levels	8,206 European ancestry individuals	NA	FALSE	FALSE	15430484	NA	TRUE	FALSE	NA	TRUE	NA
GCST90200169	Sphingomyelin (d17:1/14:0, d16:1/15:0) levels	8,267 European ancestry individuals	NA	FALSE	FALSE	15431894	NA	TRUE	FALSE	NA	TRUE	NA
GCST90200170	Octadecadienedioate (C18:2-DC) levels	8,231 European ancestry individuals	NA	FALSE	FALSE	15430442	NA	TRUE	FALSE	NA	TRUE	NA
GCST90200171	Perfluorooctanoate (PFOA) levels	8,199 European ancestry individuals	NA	FALSE	FALSE	15428812	NA	TRUE	FALSE	NA	TRUE	NA
GCST90200172	3-carboxy-4-methyl-5-pentyl-2-furanpropionate (3-CMPFP) levels	8,234 European ancestry individuals	NA	FALSE	FALSE	15430437	NA	TRUE	FALSE	NA	TRUE	NA
GCST90200173	Glutamine conjugate of C6H10O2 (2) levels	8,233 European ancestry individuals	NA	FALSE	FALSE	15430437	NA	TRUE	FALSE	NA	TRUE	NA
GCST90200174	3-hydroxybutyroylglycine levels	8,171 European ancestry individuals	NA	FALSE	FALSE	15428349	NA	TRUE	FALSE	NA	TRUE	NA
GCST90200175	Glycine conjugate of C10H14O2 (1) levels	8,128 European ancestry individuals	NA	FALSE	FALSE	15426648	NA	TRUE	FALSE	NA	TRUE	NA
GCST90200176	Glutamine conjugate of C6H10O2 (1) levels	7,980 European ancestry individuals	NA	FALSE	FALSE	15422529	NA	TRUE	FALSE	NA	TRUE	NA
GCST90200177	N-methylhydroxyproline levels	6,902 European ancestry individuals	NA	FALSE	FALSE	15371115	NA	TRUE	FALSE	NA	TRUE	NA
GCST90200178	Glucuronide of C10H18O2 (7) levels	6,090 European ancestry individuals	NA	FALSE	FALSE	15330067	NA	TRUE	FALSE	NA	TRUE	NA
GCST90200179	Glyco-beta-muricholate levels	7,206 European ancestry individuals	NA	FALSE	FALSE	15389403	NA	TRUE	FALSE	NA	TRUE	NA
GCST90200180	Glucuronide of C12H22O4 (1) levels	5,831 European ancestry individuals	NA	FALSE	FALSE	15298952	NA	TRUE	FALSE	NA	TRUE	NA
GCST90200181	N,n,n-trimethyl-alanylproline betaine (tmap) levels	8,220 European ancestry individuals	NA	FALSE	FALSE	15429732	NA	TRUE	FALSE	NA	TRUE	NA
GCST90200182	Glycine conjugate of C10H12O2 levels	6,177 European ancestry individuals	NA	FALSE	FALSE	15330729	NA	TRUE	FALSE	NA	TRUE	NA
GCST90200183	N-acetyl-2-aminooctanoate levels	8,253 European ancestry individuals	NA	FALSE	FALSE	15430099	NA	TRUE	FALSE	NA	TRUE	NA
GCST90200184	3-formylindole levels	8,256 European ancestry individuals	NA	FALSE	FALSE	15430066	NA	TRUE	FALSE	NA	TRUE	NA
GCST90200185	Gamma-glutamylcitrulline levels	8,163 European ancestry individuals	NA	FALSE	FALSE	15429219	NA	TRUE	FALSE	NA	TRUE	NA
GCST90200186	8-methoxykynurenate levels	6,938 European ancestry individuals	NA	FALSE	FALSE	15372256	NA	TRUE	FALSE	NA	TRUE	NA
GCST90200187	Tetradecadienoate (14:2) levels	8,255 European ancestry individuals	NA	FALSE	FALSE	15430740	NA	TRUE	FALSE	NA	TRUE	NA
GCST90200188	3-amino-2-piperidone levels	8,237 European ancestry individuals	NA	FALSE	FALSE	15430421	NA	TRUE	FALSE	NA	TRUE	NA
GCST90200189	Glucuronide of piperine metabolite C17H21NO3 (3) levels	6,512 European ancestry individuals	NA	FALSE	FALSE	15350454	NA	TRUE	FALSE	NA	TRUE	NA
GCST90200190	Dodecadienoate (12:2) levels	8,244 European ancestry individuals	NA	FALSE	FALSE	15430080	NA	TRUE	FALSE	NA	TRUE	NA
GCST90200191	N-lactoyl tyrosine levels	6,389 European ancestry individuals	NA	FALSE	FALSE	15345899	NA	TRUE	FALSE	NA	TRUE	NA
GCST90200192	N,N-dimethylalanine levels	8,219 European ancestry individuals	NA	FALSE	FALSE	15428993	NA	TRUE	FALSE	NA	TRUE	NA
GCST90200193	Ethyl beta-glucopyranoside levels	8,152 European ancestry individuals	NA	FALSE	FALSE	15426555	NA	TRUE	FALSE	NA	TRUE	NA
GCST90200194	N-lactoyl phenylalanine levels	8,223 European ancestry individuals	NA	FALSE	FALSE	15430024	NA	TRUE	FALSE	NA	TRUE	NA
GCST90200195	N-acetyl-isoputreanine levels	8,236 European ancestry individuals	NA	FALSE	FALSE	15430688	NA	TRUE	FALSE	NA	TRUE	NA
GCST90200196	2,2'-Methylenebis(6-tert-butyl-p-cresol) levels	7,397 European ancestry individuals	NA	FALSE	FALSE	15398141	NA	TRUE	FALSE	NA	TRUE	NA
GCST90200197	N-lactoyl isoleucine levels	7,526 European ancestry individuals	NA	FALSE	FALSE	15398773	NA	TRUE	FALSE	NA	TRUE	NA
GCST90200198	2-hydroxysebacate levels	7,865 European ancestry individuals	NA	FALSE	FALSE	15414601	NA	TRUE	FALSE	NA	TRUE	NA
GCST90200199	Ascorbic acid 3-sulfate levels	8,186 European ancestry individuals	NA	FALSE	FALSE	15427701	NA	TRUE	FALSE	NA	TRUE	NA
GCST90200200	N-lactoyl valine levels	8,133 European ancestry individuals	NA	FALSE	FALSE	15425982	NA	TRUE	FALSE	NA	TRUE	NA
GCST90200201	6-bromotryptophan levels	8,214 European ancestry individuals	NA	FALSE	FALSE	15428572	NA	TRUE	FALSE	NA	TRUE	NA
GCST90200202	Delta-CEHC levels	6,233 European ancestry individuals	NA	FALSE	FALSE	15337272	NA	TRUE	FALSE	NA	TRUE	NA
GCST90200203	Indoleacetoylcarnitine levels	7,777 European ancestry individuals	NA	FALSE	FALSE	15414860	NA	TRUE	FALSE	NA	TRUE	NA
GCST90200204	N-acetyl leucine levels	7,646 European ancestry individuals	NA	FALSE	FALSE	15405977	NA	TRUE	FALSE	NA	TRUE	NA
GCST90200205	3-indoleglyoxylic acid levels	7,848 European ancestry individuals	NA	FALSE	FALSE	15417670	NA	TRUE	FALSE	NA	TRUE	NA
GCST90200206	Sulfate of piperine metabolite C18H21NO3 (1) levels	7,021 European ancestry individuals	NA	FALSE	FALSE	15382653	NA	TRUE	FALSE	NA	TRUE	NA
GCST90200207	Methyl vanillate sulfate levels	4,303 European ancestry individuals	NA	FALSE	FALSE	15441368	NA	TRUE	FALSE	NA	TRUE	NA
GCST90200208	Glucuronide of piperine metabolite C17H21NO3 (4) levels	7,833 European ancestry individuals	NA	FALSE	FALSE	15416731	NA	TRUE	FALSE	NA	TRUE	NA
GCST90200209	Sulfate of piperine metabolite C16H19NO3 (3) levels	7,705 European ancestry individuals	NA	FALSE	FALSE	15411825	NA	TRUE	FALSE	NA	TRUE	NA
GCST90200210	Sulfate of piperine metabolite C16H19NO3 (2) levels	7,950 European ancestry individuals	NA	FALSE	FALSE	15420902	NA	TRUE	FALSE	NA	TRUE	NA
GCST90200211	3-hydroxypyridine glucuronide levels	5,882 European ancestry individuals	NA	FALSE	FALSE	15303944	NA	TRUE	FALSE	NA	TRUE	NA
GCST90200212	Glucuronide of piperine metabolite C17H21NO3 (5) levels	6,582 European ancestry individuals	NA	FALSE	FALSE	15359661	NA	TRUE	FALSE	NA	TRUE	NA
GCST90200213	2-naphthol sulfate levels	7,673 European ancestry individuals	NA	FALSE	FALSE	15410689	NA	TRUE	FALSE	NA	TRUE	NA
GCST90200214	11beta-hydroxyandrosterone glucuronide levels	8,081 European ancestry individuals	NA	FALSE	FALSE	15422948	NA	TRUE	FALSE	NA	TRUE	NA
GCST90200215	4-ethylcatechol sulfate levels	8,222 European ancestry individuals	NA	FALSE	FALSE	15428487	NA	TRUE	FALSE	NA	TRUE	NA
GCST90200216	Sulfate of piperine metabolite C18H21NO3 (3) levels	7,006 European ancestry individuals	NA	FALSE	FALSE	15381980	NA	TRUE	FALSE	NA	TRUE	NA
GCST90200217	(2,4 or 2,5)-dimethylphenol sulfate levels	5,189 European ancestry individuals	NA	FALSE	FALSE	15257694	NA	TRUE	FALSE	NA	TRUE	NA
GCST90200218	11beta-hydroxyetiocholanolone glucuronide levels	7,220 European ancestry individuals	NA	FALSE	FALSE	15385376	NA	TRUE	FALSE	NA	TRUE	NA
GCST90200219	Cholic acid glucuronide levels	4,414 European ancestry individuals	NA	FALSE	FALSE	15438562	NA	TRUE	FALSE	NA	TRUE	NA
GCST90200220	4-allylcatechol sulfate levels	8,139 European ancestry individuals	NA	FALSE	FALSE	15426802	NA	TRUE	FALSE	NA	TRUE	NA
GCST90200221	Glycoursodeoxycholic acid sulfate (1) levels	6,622 European ancestry individuals	NA	FALSE	FALSE	15359645	NA	TRUE	FALSE	NA	TRUE	NA
GCST90200222	Dihydrocaffeate sulfate (2) levels	6,519 European ancestry individuals	NA	FALSE	FALSE	15353466	NA	TRUE	FALSE	NA	TRUE	NA
GCST90200223	4-methylhexanoylglutamine levels	5,576 European ancestry individuals	NA	FALSE	FALSE	15286614	NA	TRUE	FALSE	NA	TRUE	NA
GCST90200224	2-ketocaprylate levels	8,240 European ancestry individuals	NA	FALSE	FALSE	15430625	NA	TRUE	FALSE	NA	TRUE	NA
GCST90200225	3-hydroxy-2-methylpyridine sulfate levels	7,446 European ancestry individuals	NA	FALSE	FALSE	15395961	NA	TRUE	FALSE	NA	TRUE	NA
GCST90200226	5-hydroxy-2-methylpyridine sulfate levels	6,977 European ancestry individuals	NA	FALSE	FALSE	15378125	NA	TRUE	FALSE	NA	TRUE	NA
GCST90200227	3-ethylcatechol sulfate (2) levels	4,814 European ancestry individuals	NA	FALSE	FALSE	15451266	NA	TRUE	FALSE	NA	TRUE	NA
GCST90200228	3-hydroxyhexanoylcarnitine (1) levels	8,227 European ancestry individuals	NA	FALSE	FALSE	15429814	NA	TRUE	FALSE	NA	TRUE	NA
GCST90200229	2,6-dihydroxybenzoic acid levels	8,269 European ancestry individuals	NA	FALSE	FALSE	15431363	NA	TRUE	FALSE	NA	TRUE	NA
GCST90200230	3-ethylcatechol sulfate (1) levels	7,062 European ancestry individuals	NA	FALSE	FALSE	15379652	NA	TRUE	FALSE	NA	TRUE	NA
GCST90200231	Lithocholate sulfate (1) levels	7,891 European ancestry individuals	NA	FALSE	FALSE	15417601	NA	TRUE	FALSE	NA	TRUE	NA
GCST90200232	4-acetylcatechol sulfate (1) levels	7,565 European ancestry individuals	NA	FALSE	FALSE	15403204	NA	TRUE	FALSE	NA	TRUE	NA
GCST90200233	2,3-dihydroxy-5-methylthio-4-pentenoate (dmtpa) levels	8,225 European ancestry individuals	NA	FALSE	FALSE	15429973	NA	TRUE	FALSE	NA	TRUE	NA
GCST90200234	Picolinoylglycine levels	7,862 European ancestry individuals	NA	FALSE	FALSE	15414738	NA	TRUE	FALSE	NA	TRUE	NA
GCST90200235	Succinoyltaurine levels	7,897 European ancestry individuals	NA	FALSE	FALSE	15417267	NA	TRUE	FALSE	NA	TRUE	NA
GCST90200236	Undecenoylcarnitine (C11:1) levels	8,253 European ancestry individuals	NA	FALSE	FALSE	15430983	NA	TRUE	FALSE	NA	TRUE	NA
GCST90200237	Palmitoyl-sphingosine-phosphoethanolamine (d18:1/16:0) levels	8,140 European ancestry individuals	NA	FALSE	FALSE	15425277	NA	TRUE	FALSE	NA	TRUE	NA
GCST90200238	Pregnenetriol disulfate levels	8,228 European ancestry individuals	NA	FALSE	FALSE	15429976	NA	TRUE	FALSE	NA	TRUE	NA
GCST90200239	Tetradecadienedioate (C14:2-DC) levels	7,857 European ancestry individuals	NA	FALSE	FALSE	15415310	NA	TRUE	FALSE	NA	TRUE	NA
GCST90200240	Hydroxy-N6,N6,N6-trimethyllysine levels	8,190 European ancestry individuals	NA	FALSE	FALSE	15428576	NA	TRUE	FALSE	NA	TRUE	NA
GCST90200241	Pregnenetriol sulfate levels	8,233 European ancestry individuals	NA	FALSE	FALSE	15430415	NA	TRUE	FALSE	NA	TRUE	NA
GCST90200242	Taurochenodeoxycholic acid 3-sulfate levels	7,157 European ancestry individuals	NA	FALSE	FALSE	15387423	NA	TRUE	FALSE	NA	TRUE	NA
GCST90200243	Hydroxypalmitoyl sphingomyelin (d18:1/16:0(OH)) levels	8,260 European ancestry individuals	NA	FALSE	FALSE	15430880	NA	TRUE	FALSE	NA	TRUE	NA
GCST90200244	5-hydroxymethyl-2-furoylcarnitine levels	4,803 European ancestry individuals	NA	FALSE	FALSE	15451679	NA	TRUE	FALSE	NA	TRUE	NA
GCST90200245	Eicosenedioate (C20:1-DC) levels	7,861 European ancestry individuals	NA	FALSE	FALSE	15418723	NA	TRUE	FALSE	NA	TRUE	NA
GCST90200246	3-hydroxydecanoylcarnitine levels	8,237 European ancestry individuals	NA	FALSE	FALSE	15429893	NA	TRUE	FALSE	NA	TRUE	NA
GCST90200247	Levulinoylcarnitine levels	7,197 European ancestry individuals	NA	FALSE	FALSE	15384093	NA	TRUE	FALSE	NA	TRUE	NA
GCST90200248	Cis 3,4-methyleneheptanoate levels	8,223 European ancestry individuals	NA	FALSE	FALSE	15429252	NA	TRUE	FALSE	NA	TRUE	NA
GCST90200249	Branched-chain, straight-chain, or cyclopropyl 12:1 fatty acid levels	8,256 European ancestry individuals	NA	FALSE	FALSE	15430938	NA	TRUE	FALSE	NA	TRUE	NA
GCST90200250	Deoxycholic acid 12-sulfate levels	7,438 European ancestry individuals	NA	FALSE	FALSE	15401552	NA	TRUE	FALSE	NA	TRUE	NA
GCST90200251	Branched-chain, straight-chain, or cyclopropyl 10:1 fatty acid (1) levels	8,265 European ancestry individuals	NA	FALSE	FALSE	15429498	NA	TRUE	FALSE	NA	TRUE	NA
GCST90200252	3,5-dichloro-2,6-dihydroxybenzoic acid levels	8,218 European ancestry individuals	NA	FALSE	FALSE	15429319	NA	TRUE	FALSE	NA	TRUE	NA
GCST90200253	Vanillic acid glycine levels	7,512 European ancestry individuals	NA	FALSE	FALSE	15399584	NA	TRUE	FALSE	NA	TRUE	NA
GCST90200254	(S)-a-amino-omega-caprolactam levels	8,185 European ancestry individuals	NA	FALSE	FALSE	15429519	NA	TRUE	FALSE	NA	TRUE	NA
GCST90200255	3-bromo-5-chloro-2,6-dihydroxybenzoic acid levels	8,127 European ancestry individuals	NA	FALSE	FALSE	15426099	NA	TRUE	FALSE	NA	TRUE	NA
GCST90200256	Dibutyl sulfosuccinate levels	8,099 European ancestry individuals	NA	FALSE	FALSE	15426122	NA	TRUE	FALSE	NA	TRUE	NA
GCST90200257	Metabolonic lactone sulfate levels	8,203 European ancestry individuals	NA	FALSE	FALSE	15429181	NA	TRUE	FALSE	NA	TRUE	NA
GCST90200258	2-hydroxy-4-(methylthio)butanoic acid levels	8,255 European ancestry individuals	NA	FALSE	FALSE	15430769	NA	TRUE	FALSE	NA	TRUE	NA
GCST90200259	Pentose acid levels	8,235 European ancestry individuals	NA	FALSE	FALSE	15430276	NA	TRUE	FALSE	NA	TRUE	NA
GCST90200260	Branched chain 14:0 dicarboxylic acid levels	7,990 European ancestry individuals	NA	FALSE	FALSE	15419400	NA	TRUE	FALSE	NA	TRUE	NA
GCST90200261	S-carboxyethylcysteine levels	8,010 European ancestry individuals	NA	FALSE	FALSE	15422965	NA	TRUE	FALSE	NA	TRUE	NA
GCST90200262	N-succinyl-phenylalanine levels	6,199 European ancestry individuals	NA	FALSE	FALSE	15334862	NA	TRUE	FALSE	NA	TRUE	NA
GCST90200263	(2 or 3)-decenoate (10:1n7 or n8) levels	8,124 European ancestry individuals	NA	FALSE	FALSE	15426076	NA	TRUE	FALSE	NA	TRUE	NA
GCST90200264	Bilirubin degradation product, C17H20N2O5 (2) levels	8,254 European ancestry individuals	NA	FALSE	FALSE	15430674	NA	TRUE	FALSE	NA	TRUE	NA
GCST90200265	Bilirubin degradation product, C16H18N2O5 (4) levels	8,159 European ancestry individuals	NA	FALSE	FALSE	15427305	NA	TRUE	FALSE	NA	TRUE	NA
GCST90200266	Cis-3,4-methyleneheptanoylcarnitine levels	8,259 European ancestry individuals	NA	FALSE	FALSE	15430951	NA	TRUE	FALSE	NA	TRUE	NA
GCST90200267	Tetrahydrocortisol glucuronide levels	8,182 European ancestry individuals	NA	FALSE	FALSE	15428145	NA	TRUE	FALSE	NA	TRUE	NA
GCST90200268	N-acetyl-2-aminoadipate levels	7,606 European ancestry individuals	NA	FALSE	FALSE	15406230	NA	TRUE	FALSE	NA	TRUE	NA
GCST90200269	Bilirubin degradation product, C17H20N2O5 (1) levels	8,252 European ancestry individuals	NA	FALSE	FALSE	15430726	NA	TRUE	FALSE	NA	TRUE	NA
GCST90200270	2-methoxyhydroquinone sulfate (1) levels	7,487 European ancestry individuals	NA	FALSE	FALSE	15397242	NA	TRUE	FALSE	NA	TRUE	NA
GCST90200271	Bilirubin degradation product, C16H18N2O5 (3) levels	7,970 European ancestry individuals	NA	FALSE	FALSE	15421076	NA	TRUE	FALSE	NA	TRUE	NA
GCST90200272	3-hydroxyoctanoylcarnitine (1) levels	8,245 European ancestry individuals	NA	FALSE	FALSE	15429921	NA	TRUE	FALSE	NA	TRUE	NA
GCST90200273	2-methoxyhydroquinone sulfate (2) levels	5,778 European ancestry individuals	NA	FALSE	FALSE	15299234	NA	TRUE	FALSE	NA	TRUE	NA
GCST90200274	Cis-3,4-methyleneheptanoylglycine levels	8,106 European ancestry individuals	NA	FALSE	FALSE	15424897	NA	TRUE	FALSE	NA	TRUE	NA
GCST90200275	Bilirubin degradation product, C16H18N2O5 (2) levels	8,252 European ancestry individuals	NA	FALSE	FALSE	15429788	NA	TRUE	FALSE	NA	TRUE	NA
GCST90200276	2,4-di-tert-butylphenol levels	8,251 European ancestry individuals	NA	FALSE	FALSE	15428951	NA	TRUE	FALSE	NA	TRUE	NA
GCST90200277	Bilirubin degradation product, C16H18N2O5 (1) levels	7,864 European ancestry individuals	NA	FALSE	FALSE	15416911	NA	TRUE	FALSE	NA	TRUE	NA
GCST90200278	3-hydroxyoctanoylcarnitine (2) levels	8,243 European ancestry individuals	NA	FALSE	FALSE	15429862	NA	TRUE	FALSE	NA	TRUE	NA
GCST90200279	Pantothenate levels	8,194 European ancestry individuals	NA	FALSE	FALSE	15429176	NA	TRUE	FALSE	NA	TRUE	NA
GCST90200280	5-oxoproline levels	8,247 European ancestry individuals	NA	FALSE	FALSE	15431109	NA	TRUE	FALSE	NA	TRUE	NA
GCST90200281	Phosphoethanolamine levels	8,253 European ancestry individuals	NA	FALSE	FALSE	15431131	NA	TRUE	FALSE	NA	TRUE	NA
GCST90200282	Picolinate levels	7,051 European ancestry individuals	NA	FALSE	FALSE	15378583	NA	TRUE	FALSE	NA	TRUE	NA
GCST90200283	3-ureidopropionate levels	7,543 European ancestry individuals	NA	FALSE	FALSE	15400962	NA	TRUE	FALSE	NA	TRUE	NA
GCST90200284	Erucate (22:1n9) levels	8,208 European ancestry individuals	NA	FALSE	FALSE	15430630	NA	TRUE	FALSE	NA	TRUE	NA
GCST90200285	Eicosenedioate (C20:1-DC) levels	8,166 European ancestry individuals	NA	FALSE	FALSE	15429101	NA	TRUE	FALSE	NA	TRUE	NA
GCST90200286	Allantoin levels	8,252 European ancestry individuals	NA	FALSE	FALSE	15430636	NA	TRUE	FALSE	NA	TRUE	NA
GCST90200287	N-acetylvaline levels	8,218 European ancestry individuals	NA	FALSE	FALSE	15430092	NA	TRUE	FALSE	NA	TRUE	NA
GCST90200288	N-acetylleucine levels	7,905 European ancestry individuals	NA	FALSE	FALSE	15416611	NA	TRUE	FALSE	NA	TRUE	NA
GCST90200289	N-acetylmethionine levels	7,993 European ancestry individuals	NA	FALSE	FALSE	15421342	NA	TRUE	FALSE	NA	TRUE	NA
GCST90200290	Glycerate levels	8,222 European ancestry individuals	NA	FALSE	FALSE	15429403	NA	TRUE	FALSE	NA	TRUE	NA
GCST90200291	Sarcosine levels	8,223 European ancestry individuals	NA	FALSE	FALSE	15429708	NA	TRUE	FALSE	NA	TRUE	NA
GCST90200292	Trans-4-hydroxyproline levels	8,252 European ancestry individuals	NA	FALSE	FALSE	15430498	NA	TRUE	FALSE	NA	TRUE	NA
GCST90200293	Thyroxine levels	8,262 European ancestry individuals	NA	FALSE	FALSE	15431006	NA	TRUE	FALSE	NA	TRUE	NA
GCST90200294	Pipecolate levels	8,161 European ancestry individuals	NA	FALSE	FALSE	15427570	NA	TRUE	FALSE	NA	TRUE	NA
GCST90200295	Gamma-glutamyltyrosine levels	8,221 European ancestry individuals	NA	FALSE	FALSE	15430059	NA	TRUE	FALSE	NA	TRUE	NA
GCST90200296	Methyl indole-3-acetate levels	7,032 European ancestry individuals	NA	FALSE	FALSE	15380209	NA	TRUE	FALSE	NA	TRUE	NA
GCST90200297	Ursodeoxycholate levels	6,206 European ancestry individuals	NA	FALSE	FALSE	15334066	NA	TRUE	FALSE	NA	TRUE	NA
GCST90200298	3-hydroxy-3-methylglutarate levels	8,073 European ancestry individuals	NA	FALSE	FALSE	15425610	NA	TRUE	FALSE	NA	TRUE	NA
GCST90200299	Oleoyl ethanolamide levels	8,243 European ancestry individuals	NA	FALSE	FALSE	15430106	NA	TRUE	FALSE	NA	TRUE	NA
GCST90200300	4-hydroxyphenylpyruvate levels	7,813 European ancestry individuals	NA	FALSE	FALSE	15415430	NA	TRUE	FALSE	NA	TRUE	NA
GCST90200301	Gamma-glutamylglutamine levels	8,217 European ancestry individuals	NA	FALSE	FALSE	15428726	NA	TRUE	FALSE	NA	TRUE	NA
GCST90200302	Alpha-tocopherol levels	8,192 European ancestry individuals	NA	FALSE	FALSE	15428650	NA	TRUE	FALSE	NA	TRUE	NA
GCST90200303	N-acetyl-L-alanine levels	8,220 European ancestry individuals	NA	FALSE	FALSE	15430569	NA	TRUE	FALSE	NA	TRUE	NA
GCST90200304	Citrate levels	8,260 European ancestry individuals	NA	FALSE	FALSE	15430477	NA	TRUE	FALSE	NA	TRUE	NA
GCST90200305	2-aminobutyrate levels	8,242 European ancestry individuals	NA	FALSE	FALSE	15430647	NA	TRUE	FALSE	NA	TRUE	NA
GCST90200306	Butyrate/isobutyrate (4:0) levels	8,004 European ancestry individuals	NA	FALSE	FALSE	15422693	NA	TRUE	FALSE	NA	TRUE	NA
GCST90200307	Urate levels	8,264 European ancestry individuals	NA	FALSE	FALSE	15430914	NA	TRUE	FALSE	NA	TRUE	NA
GCST90200308	3-hydroxyisobutyrate levels	8,177 European ancestry individuals	NA	FALSE	FALSE	15427851	NA	TRUE	FALSE	NA	TRUE	NA
GCST90200309	Vanillylmandelate (VMA) levels	8,216 European ancestry individuals	NA	FALSE	FALSE	15429240	NA	TRUE	FALSE	NA	TRUE	NA
GCST90200310	3-aminoisobutyrate levels	8,265 European ancestry individuals	NA	FALSE	FALSE	15430478	NA	TRUE	FALSE	NA	TRUE	NA
GCST90200311	4-acetamidobutanoate levels	8,154 European ancestry individuals	NA	FALSE	FALSE	15428044	NA	TRUE	FALSE	NA	TRUE	NA
GCST90200312	2-hydroxystearate levels	8,241 European ancestry individuals	NA	FALSE	FALSE	15428796	NA	TRUE	FALSE	NA	TRUE	NA
GCST90200313	N1-methyladenosine levels	8,247 European ancestry individuals	NA	FALSE	FALSE	15430936	NA	TRUE	FALSE	NA	TRUE	NA
GCST90200314	N-acetylneuraminate levels	8,200 European ancestry individuals	NA	FALSE	FALSE	15429999	NA	TRUE	FALSE	NA	TRUE	NA
GCST90200315	Gamma-glutamylhistidine levels	8,220 European ancestry individuals	NA	FALSE	FALSE	15429431	NA	TRUE	FALSE	NA	TRUE	NA
GCST90200316	N-acetylglucosaminylasparagine levels	8,144 European ancestry individuals	NA	FALSE	FALSE	15427396	NA	TRUE	FALSE	NA	TRUE	NA
GCST90200317	Homovanillate (hva) levels	6,320 European ancestry individuals	NA	FALSE	FALSE	15343584	NA	TRUE	FALSE	NA	TRUE	NA
GCST90200318	Acetoacetate levels	6,883 European ancestry individuals	NA	FALSE	FALSE	15371190	NA	TRUE	FALSE	NA	TRUE	NA
GCST90200319	Cys-gly, oxidized levels	8,256 European ancestry individuals	NA	FALSE	FALSE	15430969	NA	TRUE	FALSE	NA	TRUE	NA
GCST90200320	Dihomo-linoleate (20:2n6) levels	8,284 European ancestry individuals	NA	FALSE	FALSE	15431817	NA	TRUE	FALSE	NA	TRUE	NA
GCST90200321	Cholate levels	7,892 European ancestry individuals	NA	FALSE	FALSE	15419256	NA	TRUE	FALSE	NA	TRUE	NA
GCST90200322	Beta-hydroxyisovalerate levels	8,201 European ancestry individuals	NA	FALSE	FALSE	15429390	NA	TRUE	FALSE	NA	TRUE	NA
GCST90200323	Creatine levels	8,285 European ancestry individuals	NA	FALSE	FALSE	15431847	NA	TRUE	FALSE	NA	TRUE	NA
GCST90200324	Anthranilate levels	5,773 European ancestry individuals	NA	FALSE	FALSE	15303573	NA	TRUE	FALSE	NA	TRUE	NA
GCST90200325	Glycerol levels	8,285 European ancestry individuals	NA	FALSE	FALSE	15431588	NA	TRUE	FALSE	NA	TRUE	NA
GCST90200326	Gamma-glutamylleucine levels	8,041 European ancestry individuals	NA	FALSE	FALSE	15425086	NA	TRUE	FALSE	NA	TRUE	NA
GCST90200327	Choline levels	8,262 European ancestry individuals	NA	FALSE	FALSE	15431074	NA	TRUE	FALSE	NA	TRUE	NA
GCST90200328	3-methoxytyrosine levels	8,258 European ancestry individuals	NA	FALSE	FALSE	15431547	NA	TRUE	FALSE	NA	TRUE	NA
GCST90200329	3-phosphoglycerate levels	8,196 European ancestry individuals	NA	FALSE	FALSE	15429091	NA	TRUE	FALSE	NA	TRUE	NA
GCST90200330	1-palmitoyl-2-linoleoyl-gpc (16:0/18:2) levels	8,230 European ancestry individuals	NA	FALSE	FALSE	15430562	NA	TRUE	FALSE	NA	TRUE	NA
GCST90200331	1-palmitoyl-2-oleoyl-GPE (16:0/18:1) levels	8,262 European ancestry individuals	NA	FALSE	FALSE	15430799	NA	TRUE	FALSE	NA	TRUE	NA
GCST90200332	1-palmitoyl-2-linoleoyl-GPI (16:0/18:2) levels	8,115 European ancestry individuals	NA	FALSE	FALSE	15426269	NA	TRUE	FALSE	NA	TRUE	NA
GCST90200333	Taurocholic acid levels	7,743 European ancestry individuals	NA	FALSE	FALSE	15410203	NA	TRUE	FALSE	NA	TRUE	NA
GCST90200334	Taurodeoxycholate levels	7,287 European ancestry individuals	NA	FALSE	FALSE	15391666	NA	TRUE	FALSE	NA	TRUE	NA
GCST90200335	Stearoyl sphingomyelin (d18:1/18:0) levels	8,258 European ancestry individuals	NA	FALSE	FALSE	15431322	NA	TRUE	FALSE	NA	TRUE	NA
GCST90200336	Ceramide (d18:1/16:0) levels	8,266 European ancestry individuals	NA	FALSE	FALSE	15431335	NA	TRUE	FALSE	NA	TRUE	NA
GCST90200337	Taurochenodeoxycholate levels	8,048 European ancestry individuals	NA	FALSE	FALSE	15422810	NA	TRUE	FALSE	NA	TRUE	NA
GCST90200338	4-hydroxyphenylacetate levels	7,906 European ancestry individuals	NA	FALSE	FALSE	15417055	NA	TRUE	FALSE	NA	TRUE	NA
GCST90200339	5,6-dihydrothymine levels	8,219 European ancestry individuals	NA	FALSE	FALSE	15429211	NA	TRUE	FALSE	NA	TRUE	NA
GCST90200340	1-palmitoyl-2-oleoyl-gpc (16:0/18:1) levels	8,249 European ancestry individuals	NA	FALSE	FALSE	15430745	NA	TRUE	FALSE	NA	TRUE	NA
GCST90200341	N-stearoyl-sphingosine (d18:1/18:0) levels	8,254 European ancestry individuals	NA	FALSE	FALSE	15430228	NA	TRUE	FALSE	NA	TRUE	NA
GCST90200342	Glycochenodeoxycholate levels	8,164 European ancestry individuals	NA	FALSE	FALSE	15427263	NA	TRUE	FALSE	NA	TRUE	NA
GCST90200343	N-formylmethionine levels	8,235 European ancestry individuals	NA	FALSE	FALSE	15430719	NA	TRUE	FALSE	NA	TRUE	NA
GCST90200344	N6,n6,n6-trimethyllysine levels	8,180 European ancestry individuals	NA	FALSE	FALSE	15428764	NA	TRUE	FALSE	NA	TRUE	NA
GCST90200345	S-adenosylhomocysteine (SAH) levels	6,142 European ancestry individuals	NA	FALSE	FALSE	15326413	NA	TRUE	FALSE	NA	TRUE	NA
GCST90200346	4-acetaminophen sulfate levels	4,197 European ancestry individuals	NA	FALSE	FALSE	15427876	NA	TRUE	FALSE	NA	TRUE	NA
GCST90200347	2-hydroxyhippurate (salicylurate) levels	8,244 European ancestry individuals	NA	FALSE	FALSE	15430686	NA	TRUE	FALSE	NA	TRUE	NA
GCST90200348	Quinolinate levels	8,203 European ancestry individuals	NA	FALSE	FALSE	15429152	NA	TRUE	FALSE	NA	TRUE	NA
GCST90200349	Eicosapentaenoate (EPA; 20:5n3) levels	8,257 European ancestry individuals	NA	FALSE	FALSE	15430954	NA	TRUE	FALSE	NA	TRUE	NA
GCST90200350	Laurate (12:0) levels	8,226 European ancestry individuals	NA	FALSE	FALSE	15430188	NA	TRUE	FALSE	NA	TRUE	NA
GCST90200351	N-acetylputrescine levels	8,243 European ancestry individuals	NA	FALSE	FALSE	15430104	NA	TRUE	FALSE	NA	TRUE	NA
GCST90200352	Methylsuccinate levels	7,965 European ancestry individuals	NA	FALSE	FALSE	15419559	NA	TRUE	FALSE	NA	TRUE	NA
GCST90200353	9,10-DiHOME levels	7,557 European ancestry individuals	NA	FALSE	FALSE	15405104	NA	TRUE	FALSE	NA	TRUE	NA
GCST90200354	Linoleate (18:2n6) levels	8,260 European ancestry individuals	NA	FALSE	FALSE	15431169	NA	TRUE	FALSE	NA	TRUE	NA
GCST90200355	Adenosine 5'-diphosphate (ADP) levels	4,607 European ancestry individuals	NA	FALSE	FALSE	15444084	NA	TRUE	FALSE	NA	TRUE	NA
GCST90200356	Adenosine 5'-monophosphate (AMP) levels	8,218 European ancestry individuals	NA	FALSE	FALSE	15430189	NA	TRUE	FALSE	NA	TRUE	NA
GCST90200357	Adenosine 3',5'-cyclic monophosphate (camp) levels	6,756 European ancestry individuals	NA	FALSE	FALSE	15362708	NA	TRUE	FALSE	NA	TRUE	NA
GCST90200358	Arachidonate (20:4n6) levels	8,272 European ancestry individuals	NA	FALSE	FALSE	15431405	NA	TRUE	FALSE	NA	TRUE	NA
GCST90200359	5-methylthioadenosine (mta) levels	8,210 European ancestry individuals	NA	FALSE	FALSE	15429790	NA	TRUE	FALSE	NA	TRUE	NA
GCST90200360	Cortisone levels	8,153 European ancestry individuals	NA	FALSE	FALSE	15427119	NA	TRUE	FALSE	NA	TRUE	NA
GCST90200361	Beta-alanine levels	8,114 European ancestry individuals	NA	FALSE	FALSE	15426436	NA	TRUE	FALSE	NA	TRUE	NA
GCST90200362	Succinate levels	7,943 European ancestry individuals	NA	FALSE	FALSE	15419404	NA	TRUE	FALSE	NA	TRUE	NA
GCST90200363	Phosphocholine levels	8,245 European ancestry individuals	NA	FALSE	FALSE	15429912	NA	TRUE	FALSE	NA	TRUE	NA
GCST90200364	Cysteinylglycine levels	8,214 European ancestry individuals	NA	FALSE	FALSE	15428968	NA	TRUE	FALSE	NA	TRUE	NA
GCST90200365	Phenylpyruvate levels	8,241 European ancestry individuals	NA	FALSE	FALSE	15430365	NA	TRUE	FALSE	NA	TRUE	NA
GCST90200366	Creatinine levels	8,239 European ancestry individuals	NA	FALSE	FALSE	15430217	NA	TRUE	FALSE	NA	TRUE	NA
GCST90200367	3-Hydroxybutyrate levels	8,292 European ancestry individuals	NA	FALSE	FALSE	15432082	NA	TRUE	FALSE	NA	TRUE	NA
GCST90200368	Cholesterol levels	8,258 European ancestry individuals	NA	FALSE	FALSE	15431237	NA	TRUE	FALSE	NA	TRUE	NA
GCST90200369	2-hydroxyphenylacetate levels	7,564 European ancestry individuals	NA	FALSE	FALSE	15404594	NA	TRUE	FALSE	NA	TRUE	NA
GCST90200370	Aspartate levels	8,253 European ancestry individuals	NA	FALSE	FALSE	15430779	NA	TRUE	FALSE	NA	TRUE	NA
GCST90200371	3-(4-hydroxyphenyl)lactate levels	8,259 European ancestry individuals	NA	FALSE	FALSE	15430789	NA	TRUE	FALSE	NA	TRUE	NA
GCST90200372	Arginine levels	8,237 European ancestry individuals	NA	FALSE	FALSE	15429048	NA	TRUE	FALSE	NA	TRUE	NA
GCST90200373	Gluconate levels	8,106 European ancestry individuals	NA	FALSE	FALSE	15424939	NA	TRUE	FALSE	NA	TRUE	NA
GCST90200374	Sphinganine levels	7,429 European ancestry individuals	NA	FALSE	FALSE	15395846	NA	TRUE	FALSE	NA	TRUE	NA
GCST90200375	Gamma-glutamylglutamate levels	8,244 European ancestry individuals	NA	FALSE	FALSE	15430139	NA	TRUE	FALSE	NA	TRUE	NA
GCST90200376	Flavin adenine dinucleotide (FAD) levels	6,257 European ancestry individuals	NA	FALSE	FALSE	15337653	NA	TRUE	FALSE	NA	TRUE	NA
GCST90200377	Histidine levels	8,223 European ancestry individuals	NA	FALSE	FALSE	15430081	NA	TRUE	FALSE	NA	TRUE	NA
GCST90200378	Cortisol levels (plasma)	8,193 European ancestry individuals	NA	FALSE	FALSE	15428166	NA	TRUE	FALSE	NA	TRUE	NA
GCST90200379	Hypotaurine levels	8,212 European ancestry individuals	NA	FALSE	FALSE	15430104	NA	TRUE	FALSE	NA	TRUE	NA
GCST90200380	Glutarate (C5-DC) levels	7,757 European ancestry individuals	NA	FALSE	FALSE	15413654	NA	TRUE	FALSE	NA	TRUE	NA
GCST90200381	S-1-pyrroline-5-carboxylate levels	8,232 European ancestry individuals	NA	FALSE	FALSE	15430403	NA	TRUE	FALSE	NA	TRUE	NA
GCST90200382	Cystine levels	8,177 European ancestry individuals	NA	FALSE	FALSE	15426754	NA	TRUE	FALSE	NA	TRUE	NA
GCST90200383	Cystathionine levels	8,014 European ancestry individuals	NA	FALSE	FALSE	15422060	NA	TRUE	FALSE	NA	TRUE	NA
GCST90200384	Guanidinoacetate levels	8,238 European ancestry individuals	NA	FALSE	FALSE	15430738	NA	TRUE	FALSE	NA	TRUE	NA
GCST90200385	Sphingosine levels	7,982 European ancestry individuals	NA	FALSE	FALSE	15419250	NA	TRUE	FALSE	NA	TRUE	NA
GCST90200386	Deoxycholate levels	7,649 European ancestry individuals	NA	FALSE	FALSE	15409155	NA	TRUE	FALSE	NA	TRUE	NA
GCST90200387	Glycocholate levels	8,247 European ancestry individuals	NA	FALSE	FALSE	15429694	NA	TRUE	FALSE	NA	TRUE	NA
GCST90200388	Palmitoleate (16:1n7) levels	8,290 European ancestry individuals	NA	FALSE	FALSE	15431891	NA	TRUE	FALSE	NA	TRUE	NA
GCST90200389	Leucine levels	8,252 European ancestry individuals	NA	FALSE	FALSE	15431186	NA	TRUE	FALSE	NA	TRUE	NA
GCST90200390	Stearate (18:0) levels	8,272 European ancestry individuals	NA	FALSE	FALSE	15431434	NA	TRUE	FALSE	NA	TRUE	NA
GCST90200391	Methionine levels	8,222 European ancestry individuals	NA	FALSE	FALSE	15429509	NA	TRUE	FALSE	NA	TRUE	NA
GCST90200392	Orotate levels	8,128 European ancestry individuals	NA	FALSE	FALSE	15426966	NA	TRUE	FALSE	NA	TRUE	NA
GCST90200393	Phosphate levels (UKB data field 30810)	8,247 European ancestry individuals	NA	FALSE	FALSE	15430914	NA	TRUE	FALSE	NA	TRUE	NA
GCST90200394	Inosine levels	4,940 European ancestry individuals	NA	FALSE	FALSE	15463011	NA	TRUE	FALSE	NA	TRUE	NA
GCST90200395	Inosine 5'-monophosphate (IMP) levels	4,639 European ancestry individuals	NA	FALSE	FALSE	15456842	NA	TRUE	FALSE	NA	TRUE	NA
GCST90200396	Phenylalanine levels	8,228 European ancestry individuals	NA	FALSE	FALSE	15430190	NA	TRUE	FALSE	NA	TRUE	NA
GCST90200397	Palmitate (16:0) levels	8,269 European ancestry individuals	NA	FALSE	FALSE	15431567	NA	TRUE	FALSE	NA	TRUE	NA
GCST90200398	Malate levels	8,187 European ancestry individuals	NA	FALSE	FALSE	15429235	NA	TRUE	FALSE	NA	TRUE	NA
GCST90200399	Isoleucine levels	8,255 European ancestry individuals	NA	FALSE	FALSE	15431154	NA	TRUE	FALSE	NA	TRUE	NA
GCST90200400	Nicotinamide levels	8,110 European ancestry individuals	NA	FALSE	FALSE	15426273	NA	TRUE	FALSE	NA	TRUE	NA
GCST90200401	Myo-inositol levels	8,193 European ancestry individuals	NA	FALSE	FALSE	15429363	NA	TRUE	FALSE	NA	TRUE	NA
GCST90200402	Lysine levels	8,250 European ancestry individuals	NA	FALSE	FALSE	15430464	NA	TRUE	FALSE	NA	TRUE	NA
GCST90200403	Citrulline levels	8,157 European ancestry individuals	NA	FALSE	FALSE	15428505	NA	TRUE	FALSE	NA	TRUE	NA
GCST90200404	Ornithine levels	8,255 European ancestry individuals	NA	FALSE	FALSE	15430703	NA	TRUE	FALSE	NA	TRUE	NA
GCST90200405	Retinol (Vitamin A) levels	8,247 European ancestry individuals	NA	FALSE	FALSE	15429676	NA	TRUE	FALSE	NA	TRUE	NA
GCST90200406	1-methylnicotinamide levels	8,194 European ancestry individuals	NA	FALSE	FALSE	15429301	NA	TRUE	FALSE	NA	TRUE	NA
GCST90200407	Uridine levels	8,253 European ancestry individuals	NA	FALSE	FALSE	15430767	NA	TRUE	FALSE	NA	TRUE	NA
GCST90200408	Plasma lactate levels	8,217 European ancestry individuals	NA	FALSE	FALSE	15429793	NA	TRUE	FALSE	NA	TRUE	NA
GCST90200409	Pristanate levels	6,497 European ancestry individuals	NA	FALSE	FALSE	15349844	NA	TRUE	FALSE	NA	TRUE	NA
GCST90200410	Phytanate levels	8,223 European ancestry individuals	NA	FALSE	FALSE	15429970	NA	TRUE	FALSE	NA	TRUE	NA
GCST90200411	Plasma free proline levels	8,257 European ancestry individuals	NA	FALSE	FALSE	15431336	NA	TRUE	FALSE	NA	TRUE	NA
GCST90200412	Glutamate levels	8,287 European ancestry individuals	NA	FALSE	FALSE	15432170	NA	TRUE	FALSE	NA	TRUE	NA
GCST90200413	2'-deoxyuridine levels	7,915 European ancestry individuals	NA	FALSE	FALSE	15415683	NA	TRUE	FALSE	NA	TRUE	NA
GCST90200414	Myristate (14:0) levels	8,282 European ancestry individuals	NA	FALSE	FALSE	15431724	NA	TRUE	FALSE	NA	TRUE	NA
GCST90200415	Serine levels	8,271 European ancestry individuals	NA	FALSE	FALSE	15431627	NA	TRUE	FALSE	NA	TRUE	NA
GCST90200416	Trans-urocanate levels	8,198 European ancestry individuals	NA	FALSE	FALSE	15429044	NA	TRUE	FALSE	NA	TRUE	NA
GCST90200417	Urea levels	8,238 European ancestry individuals	NA	FALSE	FALSE	15430589	NA	TRUE	FALSE	NA	TRUE	NA
GCST90200418	Pyridoxal levels	8,021 European ancestry individuals	NA	FALSE	FALSE	15424075	NA	TRUE	FALSE	NA	TRUE	NA
GCST90200419	Glutamine levels	8,253 European ancestry individuals	NA	FALSE	FALSE	15430860	NA	TRUE	FALSE	NA	TRUE	NA
GCST90200420	Taurine levels	8,219 European ancestry individuals	NA	FALSE	FALSE	15430430	NA	TRUE	FALSE	NA	TRUE	NA
GCST90200421	Salicylate levels	8,191 European ancestry individuals	NA	FALSE	FALSE	15429328	NA	TRUE	FALSE	NA	TRUE	NA
GCST90200422	Serotonin levels	7,498 European ancestry individuals	NA	FALSE	FALSE	15399118	NA	TRUE	FALSE	NA	TRUE	NA
GCST90200423	Spermidine levels	7,348 European ancestry individuals	NA	FALSE	FALSE	15391096	NA	TRUE	FALSE	NA	TRUE	NA
GCST90200424	Dimethylglycine levels	8,224 European ancestry individuals	NA	FALSE	FALSE	15430076	NA	TRUE	FALSE	NA	TRUE	NA
GCST90200425	Betaine levels	8,232 European ancestry individuals	NA	FALSE	FALSE	15429964	NA	TRUE	FALSE	NA	TRUE	NA
GCST90200426	Xylose levels	6,822 European ancestry individuals	NA	FALSE	FALSE	15364312	NA	TRUE	FALSE	NA	TRUE	NA
GCST90200427	Tyrosine levels	8,252 European ancestry individuals	NA	FALSE	FALSE	15431184	NA	TRUE	FALSE	NA	TRUE	NA
GCST90200428	Caprate (10:0) levels	8,272 European ancestry individuals	NA	FALSE	FALSE	15431487	NA	TRUE	FALSE	NA	TRUE	NA
GCST90200429	Cytidine levels	7,659 European ancestry individuals	NA	FALSE	FALSE	15408137	NA	TRUE	FALSE	NA	TRUE	NA
GCST90200430	Pyruvate levels	8,259 European ancestry individuals	NA	FALSE	FALSE	15431265	NA	TRUE	FALSE	NA	TRUE	NA
GCST90200431	Alanine levels	8,265 European ancestry individuals	NA	FALSE	FALSE	15430972	NA	TRUE	FALSE	NA	TRUE	NA
GCST90200432	Threonine levels	8,245 European ancestry individuals	NA	FALSE	FALSE	15430264	NA	TRUE	FALSE	NA	TRUE	NA
GCST90200433	Cytosine levels	6,990 European ancestry individuals	NA	FALSE	FALSE	15376531	NA	TRUE	FALSE	NA	TRUE	NA
GCST90200434	12,13-DiHOME levels	7,918 European ancestry individuals	NA	FALSE	FALSE	15419527	NA	TRUE	FALSE	NA	TRUE	NA
GCST90200435	Mannose levels	8,212 European ancestry individuals	NA	FALSE	FALSE	15429302	NA	TRUE	FALSE	NA	TRUE	NA
GCST90200436	Caffeine levels	8,005 European ancestry individuals	NA	FALSE	FALSE	15423165	NA	TRUE	FALSE	NA	TRUE	NA
GCST90200437	Fructose levels	8,137 European ancestry individuals	NA	FALSE	FALSE	15426981	NA	TRUE	FALSE	NA	TRUE	NA
GCST90200438	Alpha-ketobutyrate levels	8,192 European ancestry individuals	NA	FALSE	FALSE	15428244	NA	TRUE	FALSE	NA	TRUE	NA
GCST90200439	Cysteine levels	8,216 European ancestry individuals	NA	FALSE	FALSE	15429409	NA	TRUE	FALSE	NA	TRUE	NA
GCST90200440	Blood sugar levels	8,123 European ancestry individuals	NA	FALSE	FALSE	15426368	NA	TRUE	FALSE	NA	TRUE	NA
GCST90200441	Tryptophan levels	8,235 European ancestry individuals	NA	FALSE	FALSE	15430212	NA	TRUE	FALSE	NA	TRUE	NA
GCST90200442	Valine levels	8,247 European ancestry individuals	NA	FALSE	FALSE	15430786	NA	TRUE	FALSE	NA	TRUE	NA
GCST90200443	Pseudouridine levels	8,213 European ancestry individuals	NA	FALSE	FALSE	15429589	NA	TRUE	FALSE	NA	TRUE	NA
GCST90200444	Dihydroorotate levels	8,195 European ancestry individuals	NA	FALSE	FALSE	15426607	NA	TRUE	FALSE	NA	TRUE	NA
GCST90200445	Caprylate (8:0) levels	8,163 European ancestry individuals	NA	FALSE	FALSE	15425354	NA	TRUE	FALSE	NA	TRUE	NA
GCST90200446	Arachidate (20:0) levels	8,228 European ancestry individuals	NA	FALSE	FALSE	15430570	NA	TRUE	FALSE	NA	TRUE	NA
GCST90200447	Maltose levels in coronary artery disease	6,351 European ancestry individuals	NA	FALSE	FALSE	15347032	NA	TRUE	FALSE	NA	TRUE	NA
GCST90200448	N-stearoyl-sphinganine (d18:0/18:0) levels	6,737 European ancestry individuals	NA	FALSE	FALSE	15367087	NA	TRUE	FALSE	NA	TRUE	NA
GCST90200449	Sucrose levels	7,803 European ancestry individuals	NA	FALSE	FALSE	15415171	NA	TRUE	FALSE	NA	TRUE	NA
GCST90200450	Caproate (6:0) levels	7,564 European ancestry individuals	NA	FALSE	FALSE	15404508	NA	TRUE	FALSE	NA	TRUE	NA
GCST90200451	Nonadecanoate (19:0) levels	8,231 European ancestry individuals	NA	FALSE	FALSE	15430042	NA	TRUE	FALSE	NA	TRUE	NA
GCST90200452	Plasma free asparagine levels	8,245 European ancestry individuals	NA	FALSE	FALSE	15430003	NA	TRUE	FALSE	NA	TRUE	NA
GCST90200453	X-07765 levels	8,127 European ancestry individuals	NA	FALSE	FALSE	15427497	NA	TRUE	FALSE	NA	TRUE	NA
GCST90200454	Kynurenate levels	8,241 European ancestry individuals	NA	FALSE	FALSE	15430311	NA	TRUE	FALSE	NA	TRUE	NA
GCST90200455	Alpha-ketoglutarate levels	8,212 European ancestry individuals	NA	FALSE	FALSE	15429217	NA	TRUE	FALSE	NA	TRUE	NA
GCST90200456	X-11308 levels	8,253 European ancestry individuals	NA	FALSE	FALSE	15430735	NA	TRUE	FALSE	NA	TRUE	NA
GCST90200457	Pentadecanoate (15:0) levels	8,273 European ancestry individuals	NA	FALSE	FALSE	15431327	NA	TRUE	FALSE	NA	TRUE	NA
GCST90200458	X-11315 levels	8,139 European ancestry individuals	NA	FALSE	FALSE	15426875	NA	TRUE	FALSE	NA	TRUE	NA
GCST90200459	Margarate (17:0) levels	8,279 European ancestry individuals	NA	FALSE	FALSE	15431582	NA	TRUE	FALSE	NA	TRUE	NA
GCST90200460	X-11372 levels	8,251 European ancestry individuals	NA	FALSE	FALSE	15431068	NA	TRUE	FALSE	NA	TRUE	NA
GCST90200461	X-10458 levels	7,970 European ancestry individuals	NA	FALSE	FALSE	15418298	NA	TRUE	FALSE	NA	TRUE	NA
GCST90200462	X-11299 levels	8,203 European ancestry individuals	NA	FALSE	FALSE	15429423	NA	TRUE	FALSE	NA	TRUE	NA
GCST90200463	X-11478 levels	8,242 European ancestry individuals	NA	FALSE	FALSE	15430075	NA	TRUE	FALSE	NA	TRUE	NA
GCST90200464	X-11849 levels	7,679 European ancestry individuals	NA	FALSE	FALSE	15411690	NA	TRUE	FALSE	NA	TRUE	NA
GCST90200465	X-11787 levels	8,247 European ancestry individuals	NA	FALSE	FALSE	15431000	NA	TRUE	FALSE	NA	TRUE	NA
GCST90200466	X-11632 levels	7,784 European ancestry individuals	NA	FALSE	FALSE	15414129	NA	TRUE	FALSE	NA	TRUE	NA
GCST90200467	X-11852 levels	7,295 European ancestry individuals	NA	FALSE	FALSE	15394910	NA	TRUE	FALSE	NA	TRUE	NA
GCST90200468	X-11847 levels	7,193 European ancestry individuals	NA	FALSE	FALSE	15389923	NA	TRUE	FALSE	NA	TRUE	NA
GCST90200469	X-11483 levels	7,798 European ancestry individuals	NA	FALSE	FALSE	15415518	NA	TRUE	FALSE	NA	TRUE	NA
GCST90200470	X-11470 levels	8,134 European ancestry individuals	NA	FALSE	FALSE	15425746	NA	TRUE	FALSE	NA	TRUE	NA
GCST90200471	X-11381 levels	8,225 European ancestry individuals	NA	FALSE	FALSE	15430300	NA	TRUE	FALSE	NA	TRUE	NA
GCST90200472	X-11850 levels	7,629 European ancestry individuals	NA	FALSE	FALSE	15404183	NA	TRUE	FALSE	NA	TRUE	NA
GCST90200473	X-11795 levels	8,238 European ancestry individuals	NA	FALSE	FALSE	15430933	NA	TRUE	FALSE	NA	TRUE	NA
GCST90200474	X-11444 levels	8,206 European ancestry individuals	NA	FALSE	FALSE	15428503	NA	TRUE	FALSE	NA	TRUE	NA
GCST90200475	X-11858 levels	6,008 European ancestry individuals	NA	FALSE	FALSE	15331917	NA	TRUE	FALSE	NA	TRUE	NA
GCST90200476	X-11843 levels	7,230 European ancestry individuals	NA	FALSE	FALSE	15387369	NA	TRUE	FALSE	NA	TRUE	NA
GCST90200477	X-12127 levels	5,878 European ancestry individuals	NA	FALSE	FALSE	15310194	NA	TRUE	FALSE	NA	TRUE	NA
GCST90200478	X-12221 levels	6,819 European ancestry individuals	NA	FALSE	FALSE	15363629	NA	TRUE	FALSE	NA	TRUE	NA
GCST90200479	X-12283 levels	7,763 European ancestry individuals	NA	FALSE	FALSE	15406777	NA	TRUE	FALSE	NA	TRUE	NA
GCST90200480	X-12410 levels	7,442 European ancestry individuals	NA	FALSE	FALSE	15398811	NA	TRUE	FALSE	NA	TRUE	NA
GCST90200481	X-12104 levels	7,194 European ancestry individuals	NA	FALSE	FALSE	15387507	NA	TRUE	FALSE	NA	TRUE	NA
GCST90200482	X-12193 levels	7,705 European ancestry individuals	NA	FALSE	FALSE	15406696	NA	TRUE	FALSE	NA	TRUE	NA
GCST90200483	X-12216 levels	8,181 European ancestry individuals	NA	FALSE	FALSE	15428575	NA	TRUE	FALSE	NA	TRUE	NA
GCST90200484	X-12306 levels	6,054 European ancestry individuals	NA	FALSE	FALSE	15330050	NA	TRUE	FALSE	NA	TRUE	NA
GCST90200485	X-12100 levels	8,210 European ancestry individuals	NA	FALSE	FALSE	15430162	NA	TRUE	FALSE	NA	TRUE	NA
GCST90200486	X-12261 levels	4,347 European ancestry individuals	NA	FALSE	FALSE	15426492	NA	TRUE	FALSE	NA	TRUE	NA
GCST90200487	X-11880 levels	8,206 European ancestry individuals	NA	FALSE	FALSE	15428916	NA	TRUE	FALSE	NA	TRUE	NA
GCST90200488	X-12117 levels	7,379 European ancestry individuals	NA	FALSE	FALSE	15393585	NA	TRUE	FALSE	NA	TRUE	NA
GCST90200489	X-12407 levels	6,534 European ancestry individuals	NA	FALSE	FALSE	15348660	NA	TRUE	FALSE	NA	TRUE	NA
GCST90200490	X-12101 levels	8,217 European ancestry individuals	NA	FALSE	FALSE	15430268	NA	TRUE	FALSE	NA	TRUE	NA
GCST90200491	X-12026 levels	8,180 European ancestry individuals	NA	FALSE	FALSE	15429366	NA	TRUE	FALSE	NA	TRUE	NA
GCST90200492	X-12411 levels	8,174 European ancestry individuals	NA	FALSE	FALSE	15428714	NA	TRUE	FALSE	NA	TRUE	NA
GCST90200493	X-12013 levels	5,848 European ancestry individuals	NA	FALSE	FALSE	15312597	NA	TRUE	FALSE	NA	TRUE	NA
GCST90200494	X-12007 levels	8,002 European ancestry individuals	NA	FALSE	FALSE	15421330	NA	TRUE	FALSE	NA	TRUE	NA
GCST90200495	X-12462 levels	8,236 European ancestry individuals	NA	FALSE	FALSE	15429928	NA	TRUE	FALSE	NA	TRUE	NA
GCST90200496	X-12714 levels	6,870 European ancestry individuals	NA	FALSE	FALSE	15372741	NA	TRUE	FALSE	NA	TRUE	NA
GCST90200497	X-12740 levels	6,449 European ancestry individuals	NA	FALSE	FALSE	15346050	NA	TRUE	FALSE	NA	TRUE	NA
GCST90200498	X-12730 levels	7,133 European ancestry individuals	NA	FALSE	FALSE	15384612	NA	TRUE	FALSE	NA	TRUE	NA
GCST90200499	X-12701 levels	6,278 European ancestry individuals	NA	FALSE	FALSE	15330063	NA	TRUE	FALSE	NA	TRUE	NA
GCST90200500	X-12816 levels	5,190 European ancestry individuals	NA	FALSE	FALSE	15259127	NA	TRUE	FALSE	NA	TRUE	NA
GCST90200501	X-12731 levels	5,770 European ancestry individuals	NA	FALSE	FALSE	15306286	NA	TRUE	FALSE	NA	TRUE	NA
GCST90200502	X-12707 levels	7,461 European ancestry individuals	NA	FALSE	FALSE	15399335	NA	TRUE	FALSE	NA	TRUE	NA
GCST90200503	X-12729 levels	7,446 European ancestry individuals	NA	FALSE	FALSE	15399983	NA	TRUE	FALSE	NA	TRUE	NA
GCST90200504	X-12830 levels	5,725 European ancestry individuals	NA	FALSE	FALSE	15295616	NA	TRUE	FALSE	NA	TRUE	NA
GCST90200505	X-12818 levels	6,246 European ancestry individuals	NA	FALSE	FALSE	15326545	NA	TRUE	FALSE	NA	TRUE	NA
GCST90200506	X-12812 levels	6,435 European ancestry individuals	NA	FALSE	FALSE	15342139	NA	TRUE	FALSE	NA	TRUE	NA
GCST90200507	X-12822 levels	7,957 European ancestry individuals	NA	FALSE	FALSE	15420736	NA	TRUE	FALSE	NA	TRUE	NA
GCST90200508	X-12738 levels	5,874 European ancestry individuals	NA	FALSE	FALSE	15304194	NA	TRUE	FALSE	NA	TRUE	NA
GCST90200509	X-12544 levels	7,471 European ancestry individuals	NA	FALSE	FALSE	15399646	NA	TRUE	FALSE	NA	TRUE	NA
GCST90200510	X-12680 levels	8,255 European ancestry individuals	NA	FALSE	FALSE	15430396	NA	TRUE	FALSE	NA	TRUE	NA
GCST90200511	X-12906 levels	7,896 European ancestry individuals	NA	FALSE	FALSE	15416798	NA	TRUE	FALSE	NA	TRUE	NA
GCST90200512	X-13684 levels	8,112 European ancestry individuals	NA	FALSE	FALSE	15426792	NA	TRUE	FALSE	NA	TRUE	NA
GCST90200513	X-13507 levels	7,936 European ancestry individuals	NA	FALSE	FALSE	15418372	NA	TRUE	FALSE	NA	TRUE	NA
GCST90200514	X-12851 levels	7,385 European ancestry individuals	NA	FALSE	FALSE	15395726	NA	TRUE	FALSE	NA	TRUE	NA
GCST90200515	X-12849 levels	7,555 European ancestry individuals	NA	FALSE	FALSE	15404109	NA	TRUE	FALSE	NA	TRUE	NA
GCST90200516	X-12847 levels	7,790 European ancestry individuals	NA	FALSE	FALSE	15413150	NA	TRUE	FALSE	NA	TRUE	NA
GCST90200517	X-13553 levels	8,118 European ancestry individuals	NA	FALSE	FALSE	15425695	NA	TRUE	FALSE	NA	TRUE	NA
GCST90200518	X-12839 levels	4,867 European ancestry individuals	NA	FALSE	FALSE	15458356	NA	TRUE	FALSE	NA	TRUE	NA
GCST90200519	X-13729 levels	7,724 European ancestry individuals	NA	FALSE	FALSE	15410706	NA	TRUE	FALSE	NA	TRUE	NA
GCST90200520	X-13007 levels	6,270 European ancestry individuals	NA	FALSE	FALSE	15341748	NA	TRUE	FALSE	NA	TRUE	NA
GCST90200521	X-13844 levels	7,501 European ancestry individuals	NA	FALSE	FALSE	15398992	NA	TRUE	FALSE	NA	TRUE	NA
GCST90200522	X-13728 levels	7,905 European ancestry individuals	NA	FALSE	FALSE	15420146	NA	TRUE	FALSE	NA	TRUE	NA
GCST90200523	X-12844 levels	8,231 European ancestry individuals	NA	FALSE	FALSE	15429689	NA	TRUE	FALSE	NA	TRUE	NA
GCST90200524	X-13695 levels	6,486 European ancestry individuals	NA	FALSE	FALSE	15350858	NA	TRUE	FALSE	NA	TRUE	NA
GCST90200525	X-13723 levels	5,269 European ancestry individuals	NA	FALSE	FALSE	15258271	NA	TRUE	FALSE	NA	TRUE	NA
GCST90200526	X-14056 levels	8,242 European ancestry individuals	NA	FALSE	FALSE	15430238	NA	TRUE	FALSE	NA	TRUE	NA
GCST90200527	X-13866 levels	8,252 European ancestry individuals	NA	FALSE	FALSE	15430990	NA	TRUE	FALSE	NA	TRUE	NA
GCST90200528	X-17146 levels	7,778 European ancestry individuals	NA	FALSE	FALSE	15413146	NA	TRUE	FALSE	NA	TRUE	NA
GCST90200529	X-16397 levels	8,057 European ancestry individuals	NA	FALSE	FALSE	15424887	NA	TRUE	FALSE	NA	TRUE	NA
GCST90200530	X-17335 levels	7,747 European ancestry individuals	NA	FALSE	FALSE	15411378	NA	TRUE	FALSE	NA	TRUE	NA
GCST90200531	X-16964 levels	8,048 European ancestry individuals	NA	FALSE	FALSE	15424085	NA	TRUE	FALSE	NA	TRUE	NA
GCST90200532	X-16935 levels	7,804 European ancestry individuals	NA	FALSE	FALSE	15413446	NA	TRUE	FALSE	NA	TRUE	NA
GCST90200533	X-15486 levels	8,236 European ancestry individuals	NA	FALSE	FALSE	15430469	NA	TRUE	FALSE	NA	TRUE	NA
GCST90200534	X-16580 levels	8,254 European ancestry individuals	NA	FALSE	FALSE	15431135	NA	TRUE	FALSE	NA	TRUE	NA
GCST90200535	X-17325 levels	7,448 European ancestry individuals	NA	FALSE	FALSE	15398826	NA	TRUE	FALSE	NA	TRUE	NA
GCST90200536	X-17328 levels	5,856 European ancestry individuals	NA	FALSE	FALSE	15309442	NA	TRUE	FALSE	NA	TRUE	NA
GCST90200537	X-16087 levels	7,071 European ancestry individuals	NA	FALSE	FALSE	15383204	NA	TRUE	FALSE	NA	TRUE	NA
GCST90200538	X-17010 levels	7,879 European ancestry individuals	NA	FALSE	FALSE	15416580	NA	TRUE	FALSE	NA	TRUE	NA
GCST90200539	X-14939 levels	8,250 European ancestry individuals	NA	FALSE	FALSE	15431307	NA	TRUE	FALSE	NA	TRUE	NA
GCST90200540	X-15461 levels	8,144 European ancestry individuals	NA	FALSE	FALSE	15427795	NA	TRUE	FALSE	NA	TRUE	NA
GCST90200541	X-15523 levels	8,071 European ancestry individuals	NA	FALSE	FALSE	15424746	NA	TRUE	FALSE	NA	TRUE	NA
GCST90200542	X-15728 levels	7,874 European ancestry individuals	NA	FALSE	FALSE	15413966	NA	TRUE	FALSE	NA	TRUE	NA
GCST90200543	X-15503 levels	8,237 European ancestry individuals	NA	FALSE	FALSE	15429705	NA	TRUE	FALSE	NA	TRUE	NA
GCST90200544	X-16124 levels	5,337 European ancestry individuals	NA	FALSE	FALSE	15272312	NA	TRUE	FALSE	NA	TRUE	NA
GCST90200545	X-17438 levels	6,913 European ancestry individuals	NA	FALSE	FALSE	15365729	NA	TRUE	FALSE	NA	TRUE	NA
GCST90200546	X-17354 levels	5,375 European ancestry individuals	NA	FALSE	FALSE	15269880	NA	TRUE	FALSE	NA	TRUE	NA
GCST90200547	X-17654 levels	7,690 European ancestry individuals	NA	FALSE	FALSE	15408966	NA	TRUE	FALSE	NA	TRUE	NA
GCST90200548	X-17676 levels	8,118 European ancestry individuals	NA	FALSE	FALSE	15427039	NA	TRUE	FALSE	NA	TRUE	NA
GCST90200549	X-17367 levels	6,092 European ancestry individuals	NA	FALSE	FALSE	15321108	NA	TRUE	FALSE	NA	TRUE	NA
GCST90200550	X-17357 levels	8,041 European ancestry individuals	NA	FALSE	FALSE	15424327	NA	TRUE	FALSE	NA	TRUE	NA
GCST90200551	X-18886 levels	8,198 European ancestry individuals	NA	FALSE	FALSE	15428705	NA	TRUE	FALSE	NA	TRUE	NA
GCST90200552	X-18887 levels	6,790 European ancestry individuals	NA	FALSE	FALSE	15368250	NA	TRUE	FALSE	NA	TRUE	NA
GCST90200553	X-17653 levels	8,025 European ancestry individuals	NA	FALSE	FALSE	15424164	NA	TRUE	FALSE	NA	TRUE	NA
GCST90200554	X-17346 levels	6,459 European ancestry individuals	NA	FALSE	FALSE	15343096	NA	TRUE	FALSE	NA	TRUE	NA
GCST90200555	X-17690 levels	7,043 European ancestry individuals	NA	FALSE	FALSE	15384001	NA	TRUE	FALSE	NA	TRUE	NA
GCST90200556	X-18345 levels	5,476 European ancestry individuals	NA	FALSE	FALSE	15278223	NA	TRUE	FALSE	NA	TRUE	NA
GCST90200557	X-17685 levels	7,327 European ancestry individuals	NA	FALSE	FALSE	15390006	NA	TRUE	FALSE	NA	TRUE	NA
GCST90200558	X-18888 levels	6,974 European ancestry individuals	NA	FALSE	FALSE	15372715	NA	TRUE	FALSE	NA	TRUE	NA
GCST90200559	X-18901 levels	8,128 European ancestry individuals	NA	FALSE	FALSE	15427949	NA	TRUE	FALSE	NA	TRUE	NA
GCST90200560	X-17351 levels	7,281 European ancestry individuals	NA	FALSE	FALSE	15388868	NA	TRUE	FALSE	NA	TRUE	NA
GCST90200561	X-18779 levels	8,144 European ancestry individuals	NA	FALSE	FALSE	15426933	NA	TRUE	FALSE	NA	TRUE	NA
GCST90200562	X-21286 levels	8,231 European ancestry individuals	NA	FALSE	FALSE	15430358	NA	TRUE	FALSE	NA	TRUE	NA
GCST90200563	X-21355 levels	8,257 European ancestry individuals	NA	FALSE	FALSE	15430366	NA	TRUE	FALSE	NA	TRUE	NA
GCST90200564	X-21319 levels	8,109 European ancestry individuals	NA	FALSE	FALSE	15424361	NA	TRUE	FALSE	NA	TRUE	NA
GCST90200565	X-21258 levels	8,198 European ancestry individuals	NA	FALSE	FALSE	15428505	NA	TRUE	FALSE	NA	TRUE	NA
GCST90200566	X-21364 levels	8,203 European ancestry individuals	NA	FALSE	FALSE	15429064	NA	TRUE	FALSE	NA	TRUE	NA
GCST90200567	X-21353 levels	8,265 European ancestry individuals	NA	FALSE	FALSE	15431194	NA	TRUE	FALSE	NA	TRUE	NA
GCST90200568	X-19438 levels	7,259 European ancestry individuals	NA	FALSE	FALSE	15387392	NA	TRUE	FALSE	NA	TRUE	NA
GCST90200569	X-18913 levels	8,271 European ancestry individuals	NA	FALSE	FALSE	15431181	NA	TRUE	FALSE	NA	TRUE	NA
GCST90200570	X-18921 levels	8,257 European ancestry individuals	NA	FALSE	FALSE	15430800	NA	TRUE	FALSE	NA	TRUE	NA
GCST90200571	X-21339 levels	8,203 European ancestry individuals	NA	FALSE	FALSE	15428402	NA	TRUE	FALSE	NA	TRUE	NA
GCST90200572	X-19299 levels	6,100 European ancestry individuals	NA	FALSE	FALSE	15329664	NA	TRUE	FALSE	NA	TRUE	NA
GCST90200573	X-18935 levels	4,952 European ancestry individuals	NA	FALSE	FALSE	15465872	NA	TRUE	FALSE	NA	TRUE	NA
GCST90200574	X-21310 levels	7,801 European ancestry individuals	NA	FALSE	FALSE	15413292	NA	TRUE	FALSE	NA	TRUE	NA
GCST90200575	X-21283 levels	7,055 European ancestry individuals	NA	FALSE	FALSE	15374688	NA	TRUE	FALSE	NA	TRUE	NA
GCST90200576	X-21285 levels	6,180 European ancestry individuals	NA	FALSE	FALSE	15333546	NA	TRUE	FALSE	NA	TRUE	NA
GCST90200577	X-21312 levels	4,897 European ancestry individuals	NA	FALSE	FALSE	15466547	NA	TRUE	FALSE	NA	TRUE	NA
GCST90200578	X-18922 levels	8,174 European ancestry individuals	NA	FALSE	FALSE	15428317	NA	TRUE	FALSE	NA	TRUE	NA
GCST90200579	X-21442 levels	6,827 European ancestry individuals	NA	FALSE	FALSE	15368219	NA	TRUE	FALSE	NA	TRUE	NA
GCST90200580	X-21796 levels	8,130 European ancestry individuals	NA	FALSE	FALSE	15425387	NA	TRUE	FALSE	NA	TRUE	NA
GCST90200581	X-21441 levels	8,030 European ancestry individuals	NA	FALSE	FALSE	15424784	NA	TRUE	FALSE	NA	TRUE	NA
GCST90200582	X-21752 levels	6,526 European ancestry individuals	NA	FALSE	FALSE	15349894	NA	TRUE	FALSE	NA	TRUE	NA
GCST90200583	X-21807 levels	5,602 European ancestry individuals	NA	FALSE	FALSE	15278260	NA	TRUE	FALSE	NA	TRUE	NA
GCST90200584	X-21736 levels	8,232 European ancestry individuals	NA	FALSE	FALSE	15430245	NA	TRUE	FALSE	NA	TRUE	NA
GCST90200585	X-21829 levels	8,217 European ancestry individuals	NA	FALSE	FALSE	15429228	NA	TRUE	FALSE	NA	TRUE	NA
GCST90200586	X-21471 levels	7,982 European ancestry individuals	NA	FALSE	FALSE	15419165	NA	TRUE	FALSE	NA	TRUE	NA
GCST90200587	X-21733 levels	6,916 European ancestry individuals	NA	FALSE	FALSE	15375208	NA	TRUE	FALSE	NA	TRUE	NA
GCST90200588	X-21742 levels	5,918 European ancestry individuals	NA	FALSE	FALSE	15306712	NA	TRUE	FALSE	NA	TRUE	NA
GCST90200589	X-21821 levels	7,699 European ancestry individuals	NA	FALSE	FALSE	15408996	NA	TRUE	FALSE	NA	TRUE	NA
GCST90200590	X-21470 levels	7,700 European ancestry individuals	NA	FALSE	FALSE	15411039	NA	TRUE	FALSE	NA	TRUE	NA
GCST90200591	X-21383 levels	8,226 European ancestry individuals	NA	FALSE	FALSE	15429866	NA	TRUE	FALSE	NA	TRUE	NA
GCST90200592	X-21607 levels	7,975 European ancestry individuals	NA	FALSE	FALSE	15420448	NA	TRUE	FALSE	NA	TRUE	NA
GCST90200593	X-21834 levels	7,466 European ancestry individuals	NA	FALSE	FALSE	15398563	NA	TRUE	FALSE	NA	TRUE	NA
GCST90200594	X-21467 levels	8,195 European ancestry individuals	NA	FALSE	FALSE	15429611	NA	TRUE	FALSE	NA	TRUE	NA
GCST90200595	X-22776 levels	6,944 European ancestry individuals	NA	FALSE	FALSE	15381079	NA	TRUE	FALSE	NA	TRUE	NA
GCST90200596	X-23655 levels	6,764 European ancestry individuals	NA	FALSE	FALSE	15365777	NA	TRUE	FALSE	NA	TRUE	NA
GCST90200597	X-22834 levels	6,531 European ancestry individuals	NA	FALSE	FALSE	15353831	NA	TRUE	FALSE	NA	TRUE	NA
GCST90200598	X-22771 levels	8,087 European ancestry individuals	NA	FALSE	FALSE	15425315	NA	TRUE	FALSE	NA	TRUE	NA
GCST90200599	X-23639 levels	8,272 European ancestry individuals	NA	FALSE	FALSE	15430149	NA	TRUE	FALSE	NA	TRUE	NA
GCST90200600	X-23648 levels	7,357 European ancestry individuals	NA	FALSE	FALSE	15388281	NA	TRUE	FALSE	NA	TRUE	NA
GCST90200601	X-23654 levels	8,241 European ancestry individuals	NA	FALSE	FALSE	15430653	NA	TRUE	FALSE	NA	TRUE	NA
GCST90200602	X-22520 levels	5,389 European ancestry individuals	NA	FALSE	FALSE	15275085	NA	TRUE	FALSE	NA	TRUE	NA
GCST90200603	X-23641 levels	6,673 European ancestry individuals	NA	FALSE	FALSE	15357285	NA	TRUE	FALSE	NA	TRUE	NA
GCST90200604	X-23276 levels	5,407 European ancestry individuals	NA	FALSE	FALSE	15280097	NA	TRUE	FALSE	NA	TRUE	NA
GCST90200605	X-21845 levels	4,874 European ancestry individuals	NA	FALSE	FALSE	15462393	NA	TRUE	FALSE	NA	TRUE	NA
GCST90200606	X-22509 levels	5,423 European ancestry individuals	NA	FALSE	FALSE	15277226	NA	TRUE	FALSE	NA	TRUE	NA
GCST90200607	X-23644 levels	8,250 European ancestry individuals	NA	FALSE	FALSE	15431121	NA	TRUE	FALSE	NA	TRUE	NA
GCST90200608	X-22162 levels	8,249 European ancestry individuals	NA	FALSE	FALSE	15430997	NA	TRUE	FALSE	NA	TRUE	NA
GCST90200609	X-23587 levels	7,662 European ancestry individuals	NA	FALSE	FALSE	15407271	NA	TRUE	FALSE	NA	TRUE	NA
GCST90200610	X-23593 levels	7,988 European ancestry individuals	NA	FALSE	FALSE	15419238	NA	TRUE	FALSE	NA	TRUE	NA
GCST90200611	X-23636 levels	8,251 European ancestry individuals	NA	FALSE	FALSE	15430819	NA	TRUE	FALSE	NA	TRUE	NA
GCST90200612	X-23678 levels	5,745 European ancestry individuals	NA	FALSE	FALSE	15301846	NA	TRUE	FALSE	NA	TRUE	NA
GCST90200613	X-23680 levels	8,215 European ancestry individuals	NA	FALSE	FALSE	15429265	NA	TRUE	FALSE	NA	TRUE	NA
GCST90200614	X-23780 levels	7,878 European ancestry individuals	NA	FALSE	FALSE	15416759	NA	TRUE	FALSE	NA	TRUE	NA
GCST90200615	X-23974 levels	7,752 European ancestry individuals	NA	FALSE	FALSE	15413226	NA	TRUE	FALSE	NA	TRUE	NA
GCST90200616	X-23659 levels	8,176 European ancestry individuals	NA	FALSE	FALSE	15428060	NA	TRUE	FALSE	NA	TRUE	NA
GCST90200617	X-23665 levels	8,214 European ancestry individuals	NA	FALSE	FALSE	15428821	NA	TRUE	FALSE	NA	TRUE	NA
GCST90200618	X-23782 levels	8,263 European ancestry individuals	NA	FALSE	FALSE	15431333	NA	TRUE	FALSE	NA	TRUE	NA
GCST90200619	X-24295 levels	7,987 European ancestry individuals	NA	FALSE	FALSE	15419388	NA	TRUE	FALSE	NA	TRUE	NA
GCST90200620	X-24243 levels	7,540 European ancestry individuals	NA	FALSE	FALSE	15402678	NA	TRUE	FALSE	NA	TRUE	NA
GCST90200621	X-23739 levels	8,249 European ancestry individuals	NA	FALSE	FALSE	15431287	NA	TRUE	FALSE	NA	TRUE	NA
GCST90200622	X-23997 levels	7,804 European ancestry individuals	NA	FALSE	FALSE	15409862	NA	TRUE	FALSE	NA	TRUE	NA
GCST90200623	X-24241 levels	8,053 European ancestry individuals	NA	FALSE	FALSE	15424531	NA	TRUE	FALSE	NA	TRUE	NA
GCST90200624	X-24328 levels	7,807 European ancestry individuals	NA	FALSE	FALSE	15416793	NA	TRUE	FALSE	NA	TRUE	NA
GCST90200625	X-24456 levels	6,523 European ancestry individuals	NA	FALSE	FALSE	15350499	NA	TRUE	FALSE	NA	TRUE	NA
GCST90200626	X-24418 levels	5,952 European ancestry individuals	NA	FALSE	FALSE	15310277	NA	TRUE	FALSE	NA	TRUE	NA
GCST90200627	X-24344 levels	5,457 European ancestry individuals	NA	FALSE	FALSE	15275870	NA	TRUE	FALSE	NA	TRUE	NA
GCST90200628	X-24556 levels	8,004 European ancestry individuals	NA	FALSE	FALSE	15422677	NA	TRUE	FALSE	NA	TRUE	NA
GCST90200629	X-24337 levels	8,088 European ancestry individuals	NA	FALSE	FALSE	15423414	NA	TRUE	FALSE	NA	TRUE	NA
GCST90200630	X-24546 levels	6,391 European ancestry individuals	NA	FALSE	FALSE	15351111	NA	TRUE	FALSE	NA	TRUE	NA
GCST90200631	X-24306 levels	8,074 European ancestry individuals	NA	FALSE	FALSE	15424356	NA	TRUE	FALSE	NA	TRUE	NA
GCST90200632	X-24307 levels	8,119 European ancestry individuals	NA	FALSE	FALSE	15426298	NA	TRUE	FALSE	NA	TRUE	NA
GCST90200633	X-24334 levels	6,975 European ancestry individuals	NA	FALSE	FALSE	15374286	NA	TRUE	FALSE	NA	TRUE	NA
GCST90200634	X-24518 levels	6,131 European ancestry individuals	NA	FALSE	FALSE	15326231	NA	TRUE	FALSE	NA	TRUE	NA
GCST90200635	X-24494 levels	6,767 European ancestry individuals	NA	FALSE	FALSE	15363264	NA	TRUE	FALSE	NA	TRUE	NA
GCST90200636	X-24544 levels	7,939 European ancestry individuals	NA	FALSE	FALSE	15417974	NA	TRUE	FALSE	NA	TRUE	NA
GCST90200637	X-24531 levels	6,455 European ancestry individuals	NA	FALSE	FALSE	15348017	NA	TRUE	FALSE	NA	TRUE	NA
GCST90200638	X-24811 levels	6,349 European ancestry individuals	NA	FALSE	FALSE	15337675	NA	TRUE	FALSE	NA	TRUE	NA
GCST90200639	X-24757 levels	6,251 European ancestry individuals	NA	FALSE	FALSE	15331876	NA	TRUE	FALSE	NA	TRUE	NA
GCST90200640	X-24978 levels	5,151 European ancestry individuals	NA	FALSE	FALSE	15248599	NA	TRUE	FALSE	NA	TRUE	NA
GCST90200641	X-24970 levels	8,263 European ancestry individuals	NA	FALSE	FALSE	15430626	NA	TRUE	FALSE	NA	TRUE	NA
GCST90200642	X-24795 levels	4,986 European ancestry individuals	NA	FALSE	FALSE	15466838	NA	TRUE	FALSE	NA	TRUE	NA
GCST90200643	X-24951 levels	8,208 European ancestry individuals	NA	FALSE	FALSE	15428739	NA	TRUE	FALSE	NA	TRUE	NA
GCST90200644	X-24728 levels	8,160 European ancestry individuals	NA	FALSE	FALSE	15427183	NA	TRUE	FALSE	NA	TRUE	NA
GCST90200645	X-24565 levels	4,364 European ancestry individuals	NA	FALSE	FALSE	15431669	NA	TRUE	FALSE	NA	TRUE	NA
GCST90200646	X-24801 levels	8,059 European ancestry individuals	NA	FALSE	FALSE	15424806	NA	TRUE	FALSE	NA	TRUE	NA
GCST90200647	X-24736 levels	4,846 European ancestry individuals	NA	FALSE	FALSE	15463052	NA	TRUE	FALSE	NA	TRUE	NA
GCST90200648	X-24585 levels	8,241 European ancestry individuals	NA	FALSE	FALSE	15430115	NA	TRUE	FALSE	NA	TRUE	NA
GCST90200649	X-24588 levels	8,239 European ancestry individuals	NA	FALSE	FALSE	15430112	NA	TRUE	FALSE	NA	TRUE	NA
GCST90200650	X-25109 levels	7,477 European ancestry individuals	NA	FALSE	FALSE	15402359	NA	TRUE	FALSE	NA	TRUE	NA
GCST90200651	X-24947 levels	8,002 European ancestry individuals	NA	FALSE	FALSE	15421195	NA	TRUE	FALSE	NA	TRUE	NA
GCST90200652	X-24949 levels	7,174 European ancestry individuals	NA	FALSE	FALSE	15385214	NA	TRUE	FALSE	NA	TRUE	NA
GCST90200653	X-24812 levels	7,878 European ancestry individuals	NA	FALSE	FALSE	15414520	NA	TRUE	FALSE	NA	TRUE	NA
GCST90200654	X-25217 levels	4,098 European ancestry individuals	NA	FALSE	FALSE	15416837	NA	TRUE	FALSE	NA	TRUE	NA
GCST90200655	X-25828 levels	8,156 European ancestry individuals	NA	FALSE	FALSE	15428691	NA	TRUE	FALSE	NA	TRUE	NA
GCST90200656	X-25371 levels	8,205 European ancestry individuals	NA	FALSE	FALSE	15428528	NA	TRUE	FALSE	NA	TRUE	NA
GCST90200657	X-25419 levels	7,994 European ancestry individuals	NA	FALSE	FALSE	15423198	NA	TRUE	FALSE	NA	TRUE	NA
GCST90200658	X-25265 levels	7,916 European ancestry individuals	NA	FALSE	FALSE	15417809	NA	TRUE	FALSE	NA	TRUE	NA
GCST90200659	X-25172 levels	8,117 European ancestry individuals	NA	FALSE	FALSE	15425497	NA	TRUE	FALSE	NA	TRUE	NA
GCST90200660	X-25957 levels	7,335 European ancestry individuals	NA	FALSE	FALSE	15393810	NA	TRUE	FALSE	NA	TRUE	NA
GCST90200661	X-25422 levels	8,210 European ancestry individuals	NA	FALSE	FALSE	15430495	NA	TRUE	FALSE	NA	TRUE	NA
GCST90200662	X-25790 levels	8,221 European ancestry individuals	NA	FALSE	FALSE	15429764	NA	TRUE	FALSE	NA	TRUE	NA
GCST90200663	X-25420 levels	8,271 European ancestry individuals	NA	FALSE	FALSE	15431271	NA	TRUE	FALSE	NA	TRUE	NA
GCST90200664	X-25810 levels	8,167 European ancestry individuals	NA	FALSE	FALSE	15427088	NA	TRUE	FALSE	NA	TRUE	NA
GCST90200665	X-25433 levels	6,516 European ancestry individuals	NA	FALSE	FALSE	15353611	NA	TRUE	FALSE	NA	TRUE	NA
GCST90200666	X-25343 levels	8,195 European ancestry individuals	NA	FALSE	FALSE	15427837	NA	TRUE	FALSE	NA	TRUE	NA
GCST90200667	X-25271 levels	7,906 European ancestry individuals	NA	FALSE	FALSE	15419139	NA	TRUE	FALSE	NA	TRUE	NA
GCST90200668	X-25520 levels	7,997 European ancestry individuals	NA	FALSE	FALSE	15422133	NA	TRUE	FALSE	NA	TRUE	NA
GCST90200669	X-25519 levels	8,080 European ancestry individuals	NA	FALSE	FALSE	15425390	NA	TRUE	FALSE	NA	TRUE	NA
GCST90200670	X-26111 levels	8,002 European ancestry individuals	NA	FALSE	FALSE	15423826	NA	TRUE	FALSE	NA	TRUE	NA
GCST90200671	X-26109 levels	6,992 European ancestry individuals	NA	FALSE	FALSE	15377098	NA	TRUE	FALSE	NA	TRUE	NA
GCST90200672	X-26054 levels	8,046 European ancestry individuals	NA	FALSE	FALSE	15423547	NA	TRUE	FALSE	NA	TRUE	NA
GCST90200673	Carnitine C4 levels	8,111 European ancestry individuals	NA	FALSE	FALSE	15426976	NA	TRUE	FALSE	NA	TRUE	NA
GCST90200674	Androsterone sulfate levels	8,182 European ancestry individuals	NA	FALSE	FALSE	15428238	NA	TRUE	FALSE	NA	TRUE	NA
GCST90200675	N-acetyltyrosine levels	7,841 European ancestry individuals	NA	FALSE	FALSE	15413664	NA	TRUE	FALSE	NA	TRUE	NA
GCST90200676	N-acetyl-L-glutamine levels	8,181 European ancestry individuals	NA	FALSE	FALSE	15428829	NA	TRUE	FALSE	NA	TRUE	NA
GCST90200677	N-acetylphenylalanine levels	8,228 European ancestry individuals	NA	FALSE	FALSE	15430074	NA	TRUE	FALSE	NA	TRUE	NA
GCST90200678	N-acetylasparagine levels	7,935 European ancestry individuals	NA	FALSE	FALSE	15419345	NA	TRUE	FALSE	NA	TRUE	NA
GCST90200679	N-acetylarginine levels	8,271 European ancestry individuals	NA	FALSE	FALSE	15431504	NA	TRUE	FALSE	NA	TRUE	NA
GCST90200680	5-acetylamino-6-formylamino-3-methyluracil levels	7,599 European ancestry individuals	NA	FALSE	FALSE	15405151	NA	TRUE	FALSE	NA	TRUE	NA
GCST90200681	Orotidine levels	8,017 European ancestry individuals	NA	FALSE	FALSE	15423203	NA	TRUE	FALSE	NA	TRUE	NA
GCST90200682	3-methylcytidine levels	8,117 European ancestry individuals	NA	FALSE	FALSE	15424688	NA	TRUE	FALSE	NA	TRUE	NA
GCST90200683	N-acetylcitrulline levels	7,324 European ancestry individuals	NA	FALSE	FALSE	15393120	NA	TRUE	FALSE	NA	TRUE	NA
GCST90200684	N-acetyl-aspartyl-glutamate (naag) levels	7,705 European ancestry individuals	NA	FALSE	FALSE	15413041	NA	TRUE	FALSE	NA	TRUE	NA
GCST90200685	1-stearoyl-2-arachidonoyl-gpc (18:0/20:4) levels	8,253 European ancestry individuals	NA	FALSE	FALSE	15429840	NA	TRUE	FALSE	NA	TRUE	NA
GCST90200686	Bilirubin (E,E) levels	8,263 European ancestry individuals	NA	FALSE	FALSE	15430594	NA	TRUE	FALSE	NA	TRUE	NA
GCST90200687	Bilirubin (E,Z or Z,E) levels	8,238 European ancestry individuals	NA	FALSE	FALSE	15430245	NA	TRUE	FALSE	NA	TRUE	NA
GCST90200688	Androsterone glucuronide levels	7,980 European ancestry individuals	NA	FALSE	FALSE	15419895	NA	TRUE	FALSE	NA	TRUE	NA
GCST90200689	N6-methyllysine levels	8,299 European ancestry individuals	NA	FALSE	FALSE	15432359	NA	TRUE	FALSE	NA	TRUE	NA
GCST90200690	N-acetyl-1-methylhistidine levels	7,588 European ancestry individuals	NA	FALSE	FALSE	15406311	NA	TRUE	FALSE	NA	TRUE	NA
GCST90200691	N-delta-acetylornithine levels	8,259 European ancestry individuals	NA	FALSE	FALSE	15430697	NA	TRUE	FALSE	NA	TRUE	NA
GCST90200692	1-palmitoyl-2-arachidonoyl-gpc (16:0/20:4n6) levels	8,238 European ancestry individuals	NA	FALSE	FALSE	15429442	NA	TRUE	FALSE	NA	TRUE	NA
GCST90200693	Glycochenodeoxycholate glucuronide (1) levels	8,236 European ancestry individuals	NA	FALSE	FALSE	15430142	NA	TRUE	FALSE	NA	TRUE	NA
GCST90200694	2'-o-methylcytidine levels	8,122 European ancestry individuals	NA	FALSE	FALSE	15425870	NA	TRUE	FALSE	NA	TRUE	NA
GCST90200695	2'-o-methyluridine levels	7,582 European ancestry individuals	NA	FALSE	FALSE	15405356	NA	TRUE	FALSE	NA	TRUE	NA
GCST90200696	N6,N6-dimethyllysine levels	8,265 European ancestry individuals	NA	FALSE	FALSE	15430926	NA	TRUE	FALSE	NA	TRUE	NA
GCST90200697	N2-acetyl,N6,N6-dimethyllysine levels	7,891 European ancestry individuals	NA	FALSE	FALSE	15417571	NA	TRUE	FALSE	NA	TRUE	NA
GCST90200698	N2-acetyl,N6-methyllysine levels	8,069 European ancestry individuals	NA	FALSE	FALSE	15425198	NA	TRUE	FALSE	NA	TRUE	NA
GCST90200699	Deoxycholic acid glucuronide levels	8,060 European ancestry individuals	NA	FALSE	FALSE	15424888	NA	TRUE	FALSE	NA	TRUE	NA
GCST90200700	Decadienedioic acid (C10:2-DC) levels	8,131 European ancestry individuals	NA	FALSE	FALSE	15425095	NA	TRUE	FALSE	NA	TRUE	NA
GCST90200701	Bilirubin degradation product, C17H18N2O4 (1) levels	8,254 European ancestry individuals	NA	FALSE	FALSE	15429429	NA	TRUE	FALSE	NA	TRUE	NA
GCST90200702	Bilirubin degradation product, C17H18N2O4 (2) levels	8,255 European ancestry individuals	NA	FALSE	FALSE	15429677	NA	TRUE	FALSE	NA	TRUE	NA
GCST90200703	Bilirubin degradation product, C17H18N2O4 (3) levels	8,253 European ancestry individuals	NA	FALSE	FALSE	15429420	NA	TRUE	FALSE	NA	TRUE	NA
GCST90200704	Bilirubin (z,z) levels	8,261 European ancestry individuals	NA	FALSE	FALSE	15431068	NA	TRUE	FALSE	NA	TRUE	NA
GCST90200705	Ethylmalonate levels	8,172 European ancestry individuals	NA	FALSE	FALSE	15427723	NA	TRUE	FALSE	NA	TRUE	NA
GCST90200706	Biliverdin levels	8,262 European ancestry individuals	NA	FALSE	FALSE	15431108	NA	TRUE	FALSE	NA	TRUE	NA
GCST90200707	Glycine levels	8,262 European ancestry individuals	NA	FALSE	FALSE	15431296	NA	TRUE	FALSE	NA	TRUE	NA
GCST90200708	X-12112 levels	8,211 European ancestry individuals	NA	FALSE	FALSE	15429523	NA	TRUE	FALSE	NA	TRUE	NA
GCST90200709	X-12798 levels	8,186 European ancestry individuals	NA	FALSE	FALSE	15428167	NA	TRUE	FALSE	NA	TRUE	NA
GCST90200710	X-13431 levels	8,161 European ancestry individuals	NA	FALSE	FALSE	15427350	NA	TRUE	FALSE	NA	TRUE	NA
GCST90200711	X-19141 levels	8,244 European ancestry individuals	NA	FALSE	FALSE	15430574	NA	TRUE	FALSE	NA	TRUE	NA
GCST90200712	Spermidine to 5-methylthioadenosine (MTA) ratio	7,320 European ancestry individuals	NA	FALSE	FALSE	15387635	NA	TRUE	FALSE	NA	TRUE	NA
GCST90200713	Spermidine to ornithine ratio	7,309 European ancestry individuals	NA	FALSE	FALSE	15389885	NA	TRUE	FALSE	NA	TRUE	NA
GCST90200714	Alpha-ketoglutarate to alpha-ketobutyrate ratio	8,216 European ancestry individuals	NA	FALSE	FALSE	15429621	NA	TRUE	FALSE	NA	TRUE	NA
GCST90200715	Alpha-ketoglutarate to glutamate ratio	8,274 European ancestry individuals	NA	FALSE	FALSE	15431516	NA	TRUE	FALSE	NA	TRUE	NA
GCST90200716	Adenosine 5'-diphosphate (ADP) to phosphoethanolamine ratio	4,579 European ancestry individuals	NA	FALSE	FALSE	15442905	NA	TRUE	FALSE	NA	TRUE	NA
GCST90200717	3-phosphoglycerate to adenosine 5'-diphosphate (ADP) ratio	4,530 European ancestry individuals	NA	FALSE	FALSE	15439827	NA	TRUE	FALSE	NA	TRUE	NA
GCST90200718	Alpha-ketoglutarate to succinate ratio	8,260 European ancestry individuals	NA	FALSE	FALSE	15431142	NA	TRUE	FALSE	NA	TRUE	NA
GCST90200719	Adenosine 3',5'-cyclic monophosphate (cAMP) to adenosine 5'-monophosphate (AMP) ratio	6,726 European ancestry individuals	NA	FALSE	FALSE	15361255	NA	TRUE	FALSE	NA	TRUE	NA
GCST90200720	Adenosine 5'-diphosphate (ADP) to pantothenate ratio	4,561 European ancestry individuals	NA	FALSE	FALSE	15443741	NA	TRUE	FALSE	NA	TRUE	NA
GCST90200721	Adenosine 5'-diphosphate (ADP) to phosphate ratio	4,559 European ancestry individuals	NA	FALSE	FALSE	15443646	NA	TRUE	FALSE	NA	TRUE	NA
GCST90200722	S-adenosylhomocysteine (SAH) to leucine ratio	6,122 European ancestry individuals	NA	FALSE	FALSE	15326660	NA	TRUE	FALSE	NA	TRUE	NA
GCST90200723	S-adenosylhomocysteine (SAH) to 5-methyluridine (ribothymidine) ratio	6,078 European ancestry individuals	NA	FALSE	FALSE	15324362	NA	TRUE	FALSE	NA	TRUE	NA
GCST90200724	Cholate to taurocholate ratio	7,328 European ancestry individuals	NA	FALSE	FALSE	15395924	NA	TRUE	FALSE	NA	TRUE	NA
GCST90200725	Adenosine 5'-diphosphate (ADP) to creatine ratio	4,561 European ancestry individuals	NA	FALSE	FALSE	15443600	NA	TRUE	FALSE	NA	TRUE	NA
GCST90200726	N-acetylputrescine to (N(1) + N(8))-acetylspermidine ratio	8,144 European ancestry individuals	NA	FALSE	FALSE	15428347	NA	TRUE	FALSE	NA	TRUE	NA
GCST90200727	Adenosine 3',5'-cyclic monophosphate (cAMP) to taurocholate ratio	6,329 European ancestry individuals	NA	FALSE	FALSE	15339135	NA	TRUE	FALSE	NA	TRUE	NA
GCST90200728	Adenosine 5'-diphosphate (ADP) to Adenosine 5'-monophosphate (AMP) ratio	4,573 European ancestry individuals	NA	FALSE	FALSE	15443752	NA	TRUE	FALSE	NA	TRUE	NA
GCST90200729	3-phosphoglycerate to phosphate ratio	8,153 European ancestry individuals	NA	FALSE	FALSE	15428088	NA	TRUE	FALSE	NA	TRUE	NA
GCST90200730	Adenosine 5'-diphosphate (ADP) to fructose ratio	4,571 European ancestry individuals	NA	FALSE	FALSE	15444048	NA	TRUE	FALSE	NA	TRUE	NA
GCST90200731	Adenosine 5'-diphosphate (ADP) to mannose ratio	4,587 European ancestry individuals	NA	FALSE	FALSE	15445078	NA	TRUE	FALSE	NA	TRUE	NA
GCST90200732	Adenosine 5'-diphosphate (ADP) to tyrosine ratio	4,560 European ancestry individuals	NA	FALSE	FALSE	15443680	NA	TRUE	FALSE	NA	TRUE	NA
GCST90200733	Adenosine 5'-diphosphate (ADP) to N-acetylglucosamine to N-acetylgalactosamine ratio	4,392 European ancestry individuals	NA	FALSE	FALSE	15435460	NA	TRUE	FALSE	NA	TRUE	NA
GCST90200734	Adenosine 5'-monophosphate (AMP) to palmitate (16:0) ratio	8,227 European ancestry individuals	NA	FALSE	FALSE	15430401	NA	TRUE	FALSE	NA	TRUE	NA
GCST90200735	Arginine to ornithine ratio	8,250 European ancestry individuals	NA	FALSE	FALSE	15430990	NA	TRUE	FALSE	NA	TRUE	NA
GCST90200736	Adenosine 5'-diphosphate (ADP) to arginine ratio	4,568 European ancestry individuals	NA	FALSE	FALSE	15444271	NA	TRUE	FALSE	NA	TRUE	NA
GCST90200737	Adenosine 5'-diphosphate (ADP) to 2'-deoxyuridine ratio	4,391 European ancestry individuals	NA	FALSE	FALSE	15430579	NA	TRUE	FALSE	NA	TRUE	NA
GCST90200738	Adenosine 5'-monophosphate (AMP) to inosine 5'-monophosphate (IMP) ratio	4,601 European ancestry individuals	NA	FALSE	FALSE	15454332	NA	TRUE	FALSE	NA	TRUE	NA
GCST90200739	Adenosine 5'-monophosphate (AMP) to proline ratio	8,190 European ancestry individuals	NA	FALSE	FALSE	15429560	NA	TRUE	FALSE	NA	TRUE	NA
GCST90200740	Arachidonate (20:4n6) to oleate to vaccenate (18:1) ratio	8,171 European ancestry individuals	NA	FALSE	FALSE	15428431	NA	TRUE	FALSE	NA	TRUE	NA
GCST90200741	Adenosine 5'-monophosphate (AMP) to alanine ratio	8,172 European ancestry individuals	NA	FALSE	FALSE	15429217	NA	TRUE	FALSE	NA	TRUE	NA
GCST90200742	Aspartate to citrate ratio	8,191 European ancestry individuals	NA	FALSE	FALSE	15428585	NA	TRUE	FALSE	NA	TRUE	NA
GCST90200743	Arginine to citrulline ratio	8,192 European ancestry individuals	NA	FALSE	FALSE	15428565	NA	TRUE	FALSE	NA	TRUE	NA
GCST90200744	Arginine to glutamate ratio	8,194 European ancestry individuals	NA	FALSE	FALSE	15429237	NA	TRUE	FALSE	NA	TRUE	NA
GCST90200745	Adenosine 5'-monophosphate (AMP) to phenylalanine ratio	8,189 European ancestry individuals	NA	FALSE	FALSE	15429622	NA	TRUE	FALSE	NA	TRUE	NA
GCST90200746	Adenosine 5'-diphosphate (ADP) to gluconate ratio	4,540 European ancestry individuals	NA	FALSE	FALSE	15442261	NA	TRUE	FALSE	NA	TRUE	NA
GCST90200747	Adenosine 5'-monophosphate (AMP) to phosphate ratio	8,184 European ancestry individuals	NA	FALSE	FALSE	15429480	NA	TRUE	FALSE	NA	TRUE	NA
GCST90200748	Aspartate to glutamate ratio	8,190 European ancestry individuals	NA	FALSE	FALSE	15428853	NA	TRUE	FALSE	NA	TRUE	NA
GCST90200749	Arachidonate (20:4n6) to pyruvate ratio	8,200 European ancestry individuals	NA	FALSE	FALSE	15427843	NA	TRUE	FALSE	NA	TRUE	NA
GCST90200750	Aspartate to asparagine ratio	8,195 European ancestry individuals	NA	FALSE	FALSE	15427409	NA	TRUE	FALSE	NA	TRUE	NA
GCST90200751	Cortisone to cortisol ratio	8,173 European ancestry individuals	NA	FALSE	FALSE	15427675	NA	TRUE	FALSE	NA	TRUE	NA
GCST90200752	Succinate to acetoacetate ratio	6,829 European ancestry individuals	NA	FALSE	FALSE	15369335	NA	TRUE	FALSE	NA	TRUE	NA
GCST90200753	Aspartate to citrulline ratio	8,139 European ancestry individuals	NA	FALSE	FALSE	15427134	NA	TRUE	FALSE	NA	TRUE	NA
GCST90200754	Sphingosine to phosphate ratio	8,017 European ancestry individuals	NA	FALSE	FALSE	15420681	NA	TRUE	FALSE	NA	TRUE	NA
GCST90200755	Inosine 5'-monophosphate (IMP) to phosphate ratio	4,605 European ancestry individuals	NA	FALSE	FALSE	15456240	NA	TRUE	FALSE	NA	TRUE	NA
GCST90200756	Glycine to pyridoxal ratio	8,173 European ancestry individuals	NA	FALSE	FALSE	15428033	NA	TRUE	FALSE	NA	TRUE	NA
GCST90200757	Glycine to alanine ratio	8,167 European ancestry individuals	NA	FALSE	FALSE	15427224	NA	TRUE	FALSE	NA	TRUE	NA
GCST90200758	Glycine to serine ratio	8,206 European ancestry individuals	NA	FALSE	FALSE	15429049	NA	TRUE	FALSE	NA	TRUE	NA
GCST90200759	Histidine to trans-urocanate ratio	8,109 European ancestry individuals	NA	FALSE	FALSE	15425849	NA	TRUE	FALSE	NA	TRUE	NA
GCST90200760	Methionine to methionine sulfoxide ratio	8,214 European ancestry individuals	NA	FALSE	FALSE	15428855	NA	TRUE	FALSE	NA	TRUE	NA
GCST90200761	Citrulline to dimethylarginine (SDMA + ADMA) ratio	8,243 European ancestry individuals	NA	FALSE	FALSE	15429764	NA	TRUE	FALSE	NA	TRUE	NA
GCST90200762	Palmitate (16:0) to myristate (14:0) ratio	8,215 European ancestry individuals	NA	FALSE	FALSE	15429583	NA	TRUE	FALSE	NA	TRUE	NA
GCST90200763	Phosphate to N-acetylneuraminate ratio	8,256 European ancestry individuals	NA	FALSE	FALSE	15431018	NA	TRUE	FALSE	NA	TRUE	NA
GCST90200764	Phosphate to uridine ratio	8,186 European ancestry individuals	NA	FALSE	FALSE	15428749	NA	TRUE	FALSE	NA	TRUE	NA
GCST90200765	Phosphate to alanine ratio	8,230 European ancestry individuals	NA	FALSE	FALSE	15430342	NA	TRUE	FALSE	NA	TRUE	NA
GCST90200766	Phosphate to phosphoethanolamine ratio	8,205 European ancestry individuals	NA	FALSE	FALSE	15428290	NA	TRUE	FALSE	NA	TRUE	NA
GCST90200767	Phosphate to glucose ratio	8,232 European ancestry individuals	NA	FALSE	FALSE	15429692	NA	TRUE	FALSE	NA	TRUE	NA
GCST90200768	Phosphate to 2'-deoxyuridine ratio	7,846 European ancestry individuals	NA	FALSE	FALSE	15413441	NA	TRUE	FALSE	NA	TRUE	NA
GCST90200769	Phosphate to mannose ratio	8,206 European ancestry individuals	NA	FALSE	FALSE	15430053	NA	TRUE	FALSE	NA	TRUE	NA
GCST90200770	Phenylalanine to tyrosine ratio	8,205 European ancestry individuals	NA	FALSE	FALSE	15429951	NA	TRUE	FALSE	NA	TRUE	NA
GCST90200771	Phosphate to fructose ratio	8,209 European ancestry individuals	NA	FALSE	FALSE	15429388	NA	TRUE	FALSE	NA	TRUE	NA
GCST90200772	Phosphate to citrate ratio	8,238 European ancestry individuals	NA	FALSE	FALSE	15430461	NA	TRUE	FALSE	NA	TRUE	NA
GCST90200773	Serine to alpha-tocopherol ratio	8,197 European ancestry individuals	NA	FALSE	FALSE	15429033	NA	TRUE	FALSE	NA	TRUE	NA
GCST90200774	Uridine to pseudouridine ratio	8,254 European ancestry individuals	NA	FALSE	FALSE	15431321	NA	TRUE	FALSE	NA	TRUE	NA
GCST90200775	Serine to pyruvate ratio	8,235 European ancestry individuals	NA	FALSE	FALSE	15430450	NA	TRUE	FALSE	NA	TRUE	NA
GCST90200776	Glutamate to glutamine ratio	8,228 European ancestry individuals	NA	FALSE	FALSE	15427985	NA	TRUE	FALSE	NA	TRUE	NA
GCST90200777	Uridine to cytidine ratio	7,705 European ancestry individuals	NA	FALSE	FALSE	15410596	NA	TRUE	FALSE	NA	TRUE	NA
GCST90200778	Pyruvate to 3-methyl-2-oxobutyrate ratio	8,193 European ancestry individuals	NA	FALSE	FALSE	15428378	NA	TRUE	FALSE	NA	TRUE	NA
GCST90200779	Pyruvate to N-acetylneuraminate ratio	8,194 European ancestry individuals	NA	FALSE	FALSE	15428996	NA	TRUE	FALSE	NA	TRUE	NA
GCST90200780	Alanine to pyruvate ratio	8,250 European ancestry individuals	NA	FALSE	FALSE	15430874	NA	TRUE	FALSE	NA	TRUE	NA
GCST90200781	Glucose to maltose ratio	6,308 European ancestry individuals	NA	FALSE	FALSE	15344203	NA	TRUE	FALSE	NA	TRUE	NA
GCST90200782	Mannose to trans-4-hydroxyproline ratio	8,194 European ancestry individuals	NA	FALSE	FALSE	15428740	NA	TRUE	FALSE	NA	TRUE	NA
GCST90200783	Mannose to S-methylcysteine ratio	8,182 European ancestry individuals	NA	FALSE	FALSE	15427929	NA	TRUE	FALSE	NA	TRUE	NA
GCST90200784	Glutamate to cysteine ratio	8,199 European ancestry individuals	NA	FALSE	FALSE	15426850	NA	TRUE	FALSE	NA	TRUE	NA
GCST90200785	Cysteine to 5-oxoproline ratio	8,203 European ancestry individuals	NA	FALSE	FALSE	15429376	NA	TRUE	FALSE	NA	TRUE	NA
GCST90200786	Cysteine to alanine ratio	8,220 European ancestry individuals	NA	FALSE	FALSE	15429860	NA	TRUE	FALSE	NA	TRUE	NA
GCST90200787	Glutamine to asparagine ratio	8,251 European ancestry individuals	NA	FALSE	FALSE	15431170	NA	TRUE	FALSE	NA	TRUE	NA
GCST90200788	5-oxoproline to citrate ratio	8,256 European ancestry individuals	NA	FALSE	FALSE	15430231	NA	TRUE	FALSE	NA	TRUE	NA
GCST90200789	Alpha-tocopherol to sulfate ratio	8,201 European ancestry individuals	NA	FALSE	FALSE	15428607	NA	TRUE	FALSE	NA	TRUE	NA
GCST90200790	Thyroxine to taurocholate ratio	7,615 European ancestry individuals	NA	FALSE	FALSE	15405136	NA	TRUE	FALSE	NA	TRUE	NA
GCST90200791	Creatine to carnitine ratio	8,235 European ancestry individuals	NA	FALSE	FALSE	15430150	NA	TRUE	FALSE	NA	TRUE	NA
GCST90200792	Carnitine to palmitoylcarnitine (C16) ratio	8,146 European ancestry individuals	NA	FALSE	FALSE	15427190	NA	TRUE	FALSE	NA	TRUE	NA
GCST90200793	Glycolithocholate to glycolithocholate sulfate ratio	7,043 European ancestry individuals	NA	FALSE	FALSE	15381234	NA	TRUE	FALSE	NA	TRUE	NA
GCST90200794	Oleoyl-linoleoyl-glycerol (18:1 to 18:2) [2] to linoleoyl-arachidonoyl-glycerol (18:2 to 20:4) [1] ratio	7,620 European ancestry individuals	NA	FALSE	FALSE	15401957	NA	TRUE	FALSE	NA	TRUE	NA
GCST90200795	Oleoyl-linoleoyl-glycerol (18:1 to 18:2) [2] to linoleoyl-arachidonoyl-glycerol (18:2 to 20:4) [2] ratio	7,615 European ancestry individuals	NA	FALSE	FALSE	15401922	NA	TRUE	FALSE	NA	TRUE	NA
GCST90200796	Spermidine to (N(1) + N(8))-acetylspermidine ratio	7,287 European ancestry individuals	NA	FALSE	FALSE	15387913	NA	TRUE	FALSE	NA	TRUE	NA
GCST90200797	Spermidine to N-acetylputrescine ratio	7,299 European ancestry individuals	NA	FALSE	FALSE	15388943	NA	TRUE	FALSE	NA	TRUE	NA
GCST90200798	Dopamine 4-sulfate to dopamine 3-O-sulfate ratio	6,840 European ancestry individuals	NA	FALSE	FALSE	15367805	NA	TRUE	FALSE	NA	TRUE	NA
GCST90200799	Spermidine to adenosine 5'-diphosphate (ADP) ratio	4,195 European ancestry individuals	NA	FALSE	FALSE	15417882	NA	TRUE	FALSE	NA	TRUE	NA
GCST90200800	Spermidine to histidine ratio	7,297 European ancestry individuals	NA	FALSE	FALSE	15389128	NA	TRUE	FALSE	NA	TRUE	NA
GCST90200801	5-methylthioadenosine (MTA) to phosphate ratio	8,261 European ancestry individuals	NA	FALSE	FALSE	15431001	NA	TRUE	FALSE	NA	TRUE	NA
GCST90200802	Histidine to pyruvate ratio	8,241 European ancestry individuals	NA	FALSE	FALSE	15428401	NA	TRUE	FALSE	NA	TRUE	NA
GCST90200803	Spermidine to phosphate ratio	7,382 European ancestry individuals	NA	FALSE	FALSE	15392463	NA	TRUE	FALSE	NA	TRUE	NA
GCST90200804	Spermidine to pyruvate ratio	7,296 European ancestry individuals	NA	FALSE	FALSE	15388521	NA	TRUE	FALSE	NA	TRUE	NA
GCST90200805	Spermidine to carnitine ratio	7,338 European ancestry individuals	NA	FALSE	FALSE	15390709	NA	TRUE	FALSE	NA	TRUE	NA
GCST90200806	Spermidine to ergothioneine ratio	7,291 European ancestry individuals	NA	FALSE	FALSE	15389320	NA	TRUE	FALSE	NA	TRUE	NA
GCST90200807	Carnitine to ergothioneine ratio	8,110 European ancestry individuals	NA	FALSE	FALSE	15426618	NA	TRUE	FALSE	NA	TRUE	NA
GCST90200808	Spermidine to choline ratio	7,295 European ancestry individuals	NA	FALSE	FALSE	15388902	NA	TRUE	FALSE	NA	TRUE	NA
GCST90200809	Spermidine to taurocholate ratio	6,777 European ancestry individuals	NA	FALSE	FALSE	15362253	NA	TRUE	FALSE	NA	TRUE	NA
GCST90200810	Alpha-ketoglutarate to kynurenine ratio	8,272 European ancestry individuals	NA	FALSE	FALSE	15431458	NA	TRUE	FALSE	NA	TRUE	NA
GCST90200811	Choline to taurocholate ratio	7,625 European ancestry individuals	NA	FALSE	FALSE	15406479	NA	TRUE	FALSE	NA	TRUE	NA
GCST90200812	Glutamate to kynurenine ratio	8,184 European ancestry individuals	NA	FALSE	FALSE	15426860	NA	TRUE	FALSE	NA	TRUE	NA
GCST90200813	Ornithine to glutamate ratio	8,202 European ancestry individuals	NA	FALSE	FALSE	15428262	NA	TRUE	FALSE	NA	TRUE	NA
GCST90200814	Alpha-ketoglutarate to ornithine ratio	8,273 European ancestry individuals	NA	FALSE	FALSE	15431492	NA	TRUE	FALSE	NA	TRUE	NA
GCST90200815	3-hydroxyisobutyrate to adenosine 5'-diphosphate (ADP) ratio	4,488 European ancestry individuals	NA	FALSE	FALSE	15437474	NA	TRUE	FALSE	NA	TRUE	NA
GCST90200816	Alpha-ketoglutarate to aspartate ratio	8,272 European ancestry individuals	NA	FALSE	FALSE	15431441	NA	TRUE	FALSE	NA	TRUE	NA
GCST90200817	3-hydroxyisobutyrate to phosphate ratio	8,170 European ancestry individuals	NA	FALSE	FALSE	15427699	NA	TRUE	FALSE	NA	TRUE	NA
GCST90200818	Adenosine 5'-diphosphate (ADP) to glycerate ratio	4,544 European ancestry individuals	NA	FALSE	FALSE	15443317	NA	TRUE	FALSE	NA	TRUE	NA
GCST90200819	3-phosphoglycerate to glycerate ratio	8,101 European ancestry individuals	NA	FALSE	FALSE	15425320	NA	TRUE	FALSE	NA	TRUE	NA
GCST90200820	Adenosine 5'-diphosphate (ADP) to valine ratio	4,608 European ancestry individuals	NA	FALSE	FALSE	15445626	NA	TRUE	FALSE	NA	TRUE	NA
GCST90200821	Adenosine 5'-diphosphate (ADP) to glycine ratio	4,577 European ancestry individuals	NA	FALSE	FALSE	15444772	NA	TRUE	FALSE	NA	TRUE	NA
GCST90200822	Phosphate to valine ratio	8,277 European ancestry individuals	NA	FALSE	FALSE	15431629	NA	TRUE	FALSE	NA	TRUE	NA
GCST90200823	Adenosine 5'-diphosphate (ADP) to N-palmitoyl-sphingosine (d18:1 to 16:0) ratio	4,561 European ancestry individuals	NA	FALSE	FALSE	15443271	NA	TRUE	FALSE	NA	TRUE	NA
GCST90200824	Adenosine 5'-diphosphate (ADP) to sulfate ratio	4,570 European ancestry individuals	NA	FALSE	FALSE	15444279	NA	TRUE	FALSE	NA	TRUE	NA
GCST90200825	Phosphate to sulfate ratio	8,211 European ancestry individuals	NA	FALSE	FALSE	15428574	NA	TRUE	FALSE	NA	TRUE	NA
GCST90200826	Glycine to phosphate ratio	8,271 European ancestry individuals	NA	FALSE	FALSE	15431669	NA	TRUE	FALSE	NA	TRUE	NA
GCST90200827	Phosphate to N-palmitoyl-sphingosine (d18:1 to 16:0) ratio	8,223 European ancestry individuals	NA	FALSE	FALSE	15430113	NA	TRUE	FALSE	NA	TRUE	NA
GCST90200828	Cholate to bilirubin (Z,Z) ratio	7,747 European ancestry individuals	NA	FALSE	FALSE	15414235	NA	TRUE	FALSE	NA	TRUE	NA
GCST90200829	Bilirubin (Z,Z) to taurocholate ratio	7,620 European ancestry individuals	NA	FALSE	FALSE	15406151	NA	TRUE	FALSE	NA	TRUE	NA
GCST90200830	Cholate to adenosine 3',5'-cyclic monophosphate (cAMP) ratio	6,359 European ancestry individuals	NA	FALSE	FALSE	15343876	NA	TRUE	FALSE	NA	TRUE	NA
GCST90200831	Cholate to phosphate ratio	7,742 European ancestry individuals	NA	FALSE	FALSE	15413743	NA	TRUE	FALSE	NA	TRUE	NA
GCST90200832	Adenosine 5'-diphosphate (ADP) to citrate ratio	4,567 European ancestry individuals	NA	FALSE	FALSE	15443946	NA	TRUE	FALSE	NA	TRUE	NA
GCST90200833	Cholate to adenosine 5'-monophosphate (AMP) ratio	7,769 European ancestry individuals	NA	FALSE	FALSE	15415008	NA	TRUE	FALSE	NA	TRUE	NA
GCST90200834	Adenosine 5'-diphosphate (ADP) to glycerol 3-phosphate ratio	4,588 European ancestry individuals	NA	FALSE	FALSE	15442233	NA	TRUE	FALSE	NA	TRUE	NA
GCST90200835	Adenosine 5'-diphosphate (ADP) to glycerol ratio	4,575 European ancestry individuals	NA	FALSE	FALSE	15444251	NA	TRUE	FALSE	NA	TRUE	NA
GCST90200836	Glycerol to glycerol 3-phosphate ratio	8,188 European ancestry individuals	NA	FALSE	FALSE	15427011	NA	TRUE	FALSE	NA	TRUE	NA
GCST90200837	Adenosine 5'-diphosphate (ADP) to glutamate ratio	4,556 European ancestry individuals	NA	FALSE	FALSE	15443590	NA	TRUE	FALSE	NA	TRUE	NA
GCST90200838	Phosphate to glutamate ratio	8,211 European ancestry individuals	NA	FALSE	FALSE	15430457	NA	TRUE	FALSE	NA	TRUE	NA
GCST90200839	Adenosine 5'-diphosphate (ADP) to aspartate ratio	4,563 European ancestry individuals	NA	FALSE	FALSE	15443383	NA	TRUE	FALSE	NA	TRUE	NA
GCST90200840	Adenosine 5'-diphosphate (ADP) to flavin adenine dinucleotide (FAD) ratio	3,441 European ancestry individuals	NA	FALSE	FALSE	15362845	NA	TRUE	FALSE	NA	TRUE	NA
GCST90200841	Adenosine 5'-diphosphate (ADP) to oxalate (ethanedioate) ratio	4,556 European ancestry individuals	NA	FALSE	FALSE	15443975	NA	TRUE	FALSE	NA	TRUE	NA
GCST90200842	Citrate to oxalate (ethanedioate) ratio	8,097 European ancestry individuals	NA	FALSE	FALSE	15424311	NA	TRUE	FALSE	NA	TRUE	NA
GCST90200843	Adenosine 5'-monophosphate (AMP) to flavin adenine dinucleotide (FAD) ratio	6,188 European ancestry individuals	NA	FALSE	FALSE	15335000	NA	TRUE	FALSE	NA	TRUE	NA
GCST90200844	Aspartate to phosphate ratio	8,297 European ancestry individuals	NA	FALSE	FALSE	15432198	NA	TRUE	FALSE	NA	TRUE	NA
GCST90200845	Adenosine 5'-monophosphate (AMP) to citrate ratio	8,193 European ancestry individuals	NA	FALSE	FALSE	15429575	NA	TRUE	FALSE	NA	TRUE	NA
GCST90200846	Phenylalanine to phosphate ratio	8,294 European ancestry individuals	NA	FALSE	FALSE	15432103	NA	TRUE	FALSE	NA	TRUE	NA
GCST90200847	Phosphate to tryptophan ratio	8,206 European ancestry individuals	NA	FALSE	FALSE	15429839	NA	TRUE	FALSE	NA	TRUE	NA
GCST90200848	Adenosine 5'-monophosphate (AMP) to glutamine ratio	8,196 European ancestry individuals	NA	FALSE	FALSE	15429366	NA	TRUE	FALSE	NA	TRUE	NA
GCST90200849	Adenosine 5'-monophosphate (AMP) to threonine ratio	8,173 European ancestry individuals	NA	FALSE	FALSE	15429002	NA	TRUE	FALSE	NA	TRUE	NA
GCST90200850	Adenosine 5'-monophosphate (AMP) to tryptophan ratio	8,180 European ancestry individuals	NA	FALSE	FALSE	15429221	NA	TRUE	FALSE	NA	TRUE	NA
GCST90200851	Adenosine 5'-monophosphate (AMP) to glycine ratio	8,195 European ancestry individuals	NA	FALSE	FALSE	15429582	NA	TRUE	FALSE	NA	TRUE	NA
GCST90200852	Adenosine 5'-monophosphate (AMP) to arginine ratio	8,185 European ancestry individuals	NA	FALSE	FALSE	15429106	NA	TRUE	FALSE	NA	TRUE	NA
GCST90200853	Adenosine 5'-monophosphate (AMP) to tyrosine ratio	8,193 European ancestry individuals	NA	FALSE	FALSE	15429705	NA	TRUE	FALSE	NA	TRUE	NA
GCST90200854	Arginine to phosphate ratio	8,297 European ancestry individuals	NA	FALSE	FALSE	15432380	NA	TRUE	FALSE	NA	TRUE	NA
GCST90200855	Phosphate to threonine ratio	8,226 European ancestry individuals	NA	FALSE	FALSE	15430293	NA	TRUE	FALSE	NA	TRUE	NA
GCST90200856	Phosphate to glutamine ratio	8,258 European ancestry individuals	NA	FALSE	FALSE	15431351	NA	TRUE	FALSE	NA	TRUE	NA
GCST90200857	Adenosine 5'-monophosphate (AMP) to aspartate ratio	8,205 European ancestry individuals	NA	FALSE	FALSE	15429312	NA	TRUE	FALSE	NA	TRUE	NA
GCST90200858	Phosphate to tyrosine ratio	8,226 European ancestry individuals	NA	FALSE	FALSE	15430025	NA	TRUE	FALSE	NA	TRUE	NA
GCST90200859	Adenosine 5'-monophosphate (AMP) to asparagine ratio	8,188 European ancestry individuals	NA	FALSE	FALSE	15429547	NA	TRUE	FALSE	NA	TRUE	NA
GCST90200860	Adenosine 5'-monophosphate (AMP) to serine ratio	8,194 European ancestry individuals	NA	FALSE	FALSE	15429478	NA	TRUE	FALSE	NA	TRUE	NA
GCST90200861	Histidine to phosphate ratio	8,294 European ancestry individuals	NA	FALSE	FALSE	15432017	NA	TRUE	FALSE	NA	TRUE	NA
GCST90200862	Adenosine 5'-monophosphate (AMP) to methionine ratio	8,194 European ancestry individuals	NA	FALSE	FALSE	15429544	NA	TRUE	FALSE	NA	TRUE	NA
GCST90200863	Phosphate to serine ratio	8,226 European ancestry individuals	NA	FALSE	FALSE	15428649	NA	TRUE	FALSE	NA	TRUE	NA
GCST90200864	Methionine to phosphate ratio	8,291 European ancestry individuals	NA	FALSE	FALSE	15432092	NA	TRUE	FALSE	NA	TRUE	NA
GCST90200865	Adenosine 5'-monophosphate (AMP) to histidine ratio	8,180 European ancestry individuals	NA	FALSE	FALSE	15429172	NA	TRUE	FALSE	NA	TRUE	NA
GCST90200866	phosphate to asparagine ratio	8,249 European ancestry individuals	NA	FALSE	FALSE	15430935	NA	TRUE	FALSE	NA	TRUE	NA
GCST90200867	Adenosine 5'-monophosphate (AMP) to isoleucine ratio	8,200 European ancestry individuals	NA	FALSE	FALSE	15429842	NA	TRUE	FALSE	NA	TRUE	NA
GCST90200868	Isoleucine to phosphate ratio	8,298 European ancestry individuals	NA	FALSE	FALSE	15432369	NA	TRUE	FALSE	NA	TRUE	NA
GCST90200869	Adenosine 5'-monophosphate (AMP) to valine ratio	8,225 European ancestry individuals	NA	FALSE	FALSE	15429772	NA	TRUE	FALSE	NA	TRUE	NA
GCST90200870	Adenosine 5'-monophosphate (AMP) to acetoacetate ratio	6,773 European ancestry individuals	NA	FALSE	FALSE	15367070	NA	TRUE	FALSE	NA	TRUE	NA
GCST90200871	Adenosine 5'-monophosphate (AMP) to cysteine ratio	8,177 European ancestry individuals	NA	FALSE	FALSE	15429354	NA	TRUE	FALSE	NA	TRUE	NA
GCST90200872	Phosphate to cysteine ratio	8,195 European ancestry individuals	NA	FALSE	FALSE	15427834	NA	TRUE	FALSE	NA	TRUE	NA
GCST90200873	Cortisol to 4-cholesten-3-one ratio	7,027 European ancestry individuals	NA	FALSE	FALSE	15375841	NA	TRUE	FALSE	NA	TRUE	NA
GCST90200874	Cysteinylglycine to taurine ratio	8,193 European ancestry individuals	NA	FALSE	FALSE	15429201	NA	TRUE	FALSE	NA	TRUE	NA
GCST90200875	Cysteinylglycine to glutamate ratio	8,197 European ancestry individuals	NA	FALSE	FALSE	15429837	NA	TRUE	FALSE	NA	TRUE	NA
GCST90200876	Cortisone to 4-cholesten-3-one ratio	6,971 European ancestry individuals	NA	FALSE	FALSE	15372915	NA	TRUE	FALSE	NA	TRUE	NA
GCST90200877	Taurine to glutamate ratio	8,220 European ancestry individuals	NA	FALSE	FALSE	15427719	NA	TRUE	FALSE	NA	TRUE	NA
GCST90200878	Glutarate (C5-DC) to caprylate (8:0) ratio	7,685 European ancestry individuals	NA	FALSE	FALSE	15409021	NA	TRUE	FALSE	NA	TRUE	NA
GCST90200879	Adenosine 5'-monophosphate (AMP) to glutamate ratio	8,213 European ancestry individuals	NA	FALSE	FALSE	15429360	NA	TRUE	FALSE	NA	TRUE	NA
GCST90200880	Glutarate (C5-DC) to salicylate ratio	7,684 European ancestry individuals	NA	FALSE	FALSE	15410464	NA	TRUE	FALSE	NA	TRUE	NA
GCST90200881	Aspartate to N-acetylglucosamine to N-acetylgalactosamine ratio	7,899 European ancestry individuals	NA	FALSE	FALSE	15416513	NA	TRUE	FALSE	NA	TRUE	NA
GCST90200882	Aspartate to mannose ratio	8,162 European ancestry individuals	NA	FALSE	FALSE	15427657	NA	TRUE	FALSE	NA	TRUE	NA
GCST90200883	Phosphate to acetoacetate ratio	6,791 European ancestry individuals	NA	FALSE	FALSE	15368126	NA	TRUE	FALSE	NA	TRUE	NA
GCST90200884	Mannose to N-acetylglucosamine to N-acetylgalactosamine ratio	7,907 European ancestry individuals	NA	FALSE	FALSE	15416676	NA	TRUE	FALSE	NA	TRUE	NA
GCST90200885	Phenylpyruvate to citrate ratio	8,177 European ancestry individuals	NA	FALSE	FALSE	15429018	NA	TRUE	FALSE	NA	TRUE	NA
GCST90200886	Phenylpyruvate to 4-hydroxyphenylpyruvate ratio	7,829 European ancestry individuals	NA	FALSE	FALSE	15415896	NA	TRUE	FALSE	NA	TRUE	NA
GCST90200887	Cholesterol to cortisol ratio	8,211 European ancestry individuals	NA	FALSE	FALSE	15429346	NA	TRUE	FALSE	NA	TRUE	NA
GCST90200888	Citrate to 4-hydroxyphenylpyruvate ratio	7,851 European ancestry individuals	NA	FALSE	FALSE	15417294	NA	TRUE	FALSE	NA	TRUE	NA
GCST90200889	Cholesterol to taurocholate ratio	7,611 European ancestry individuals	NA	FALSE	FALSE	15405905	NA	TRUE	FALSE	NA	TRUE	NA
GCST90200890	Cortisol to taurocholate ratio	7,610 European ancestry individuals	NA	FALSE	FALSE	15406285	NA	TRUE	FALSE	NA	TRUE	NA
GCST90200891	Salicylate to caprylate (8:0) ratio	8,068 European ancestry individuals	NA	FALSE	FALSE	15424503	NA	TRUE	FALSE	NA	TRUE	NA
GCST90200892	Hypotaurine to taurine ratio	8,157 European ancestry individuals	NA	FALSE	FALSE	15428617	NA	TRUE	FALSE	NA	TRUE	NA
GCST90200893	Taurine to cysteine ratio	8,186 European ancestry individuals	NA	FALSE	FALSE	15428569	NA	TRUE	FALSE	NA	TRUE	NA
GCST90200894	Inosine to theophylline ratio	4,662 European ancestry individuals	NA	FALSE	FALSE	15451360	NA	TRUE	FALSE	NA	TRUE	NA
GCST90200895	Hypotaurine to cysteine ratio	8,134 European ancestry individuals	NA	FALSE	FALSE	15427713	NA	TRUE	FALSE	NA	TRUE	NA
GCST90200896	Inosine to EDTA ratio	4,926 European ancestry individuals	NA	FALSE	FALSE	15462587	NA	TRUE	FALSE	NA	TRUE	NA
GCST90200897	Theophylline to EDTA ratio	7,867 European ancestry individuals	NA	FALSE	FALSE	15416936	NA	TRUE	FALSE	NA	TRUE	NA
GCST90200898	Citrulline to phosphate ratio	8,294 European ancestry individuals	NA	FALSE	FALSE	15432024	NA	TRUE	FALSE	NA	TRUE	NA
GCST90200899	Citrulline to ornithine ratio	8,225 European ancestry individuals	NA	FALSE	FALSE	15430340	NA	TRUE	FALSE	NA	TRUE	NA
GCST90200900	Phosphate to oleoyl-linoleoyl-glycerol (18:1 to 18:2) [2] ratio	7,992 European ancestry individuals	NA	FALSE	FALSE	15418831	NA	TRUE	FALSE	NA	TRUE	NA
GCST90200901	Ornithine to phosphate ratio	8,295 European ancestry individuals	NA	FALSE	FALSE	15432162	NA	TRUE	FALSE	NA	TRUE	NA
GCST90200902	Phosphate to linoleoyl-arachidonoyl-glycerol (18:2 to 20:4) [2] ratio	7,649 European ancestry individuals	NA	FALSE	FALSE	15404687	NA	TRUE	FALSE	NA	TRUE	NA
GCST90200903	Phosphate to glycerol ratio	8,179 European ancestry individuals	NA	FALSE	FALSE	15428583	NA	TRUE	FALSE	NA	TRUE	NA
GCST90200904	Phosphate to linoleoyl-arachidonoyl-glycerol (18:2 to 20:4) [1] ratio	7,623 European ancestry individuals	NA	FALSE	FALSE	15401520	NA	TRUE	FALSE	NA	TRUE	NA
GCST90200905	Glucose to glycerol ratio	8,160 European ancestry individuals	NA	FALSE	FALSE	15428243	NA	TRUE	FALSE	NA	TRUE	NA
GCST90200906	2'-deoxyuridine to cytidine ratio	7,410 European ancestry individuals	NA	FALSE	FALSE	15395700	NA	TRUE	FALSE	NA	TRUE	NA
GCST90200907	Retinol (Vitamin A) to linoleoyl-arachidonoyl-glycerol (18:2 to 20:4) [1] ratio	7,617 European ancestry individuals	NA	FALSE	FALSE	15401710	NA	TRUE	FALSE	NA	TRUE	NA
GCST90200908	Retinol (Vitamin A) to linoleoyl-arachidonoyl-glycerol (18:2 to 20:4) [2] ratio	7,668 European ancestry individuals	NA	FALSE	FALSE	15405185	NA	TRUE	FALSE	NA	TRUE	NA
GCST90200909	Uridine to 2'-deoxyuridine ratio	7,873 European ancestry individuals	NA	FALSE	FALSE	15413944	NA	TRUE	FALSE	NA	TRUE	NA
GCST90200910	Retinol (Vitamin A) to oleoyl-linoleoyl-glycerol (18:1 to 18:2) [2] ratio	7,981 European ancestry individuals	NA	FALSE	FALSE	15417966	NA	TRUE	FALSE	NA	TRUE	NA
GCST90200911	Tryptophan to pyruvate ratio	8,224 European ancestry individuals	NA	FALSE	FALSE	15430393	NA	TRUE	FALSE	NA	TRUE	NA
GCST90200912	tryptophan to tyrosine ratio	8,226 European ancestry individuals	NA	FALSE	FALSE	15430116	NA	TRUE	FALSE	NA	TRUE	NA
GCST90200913	Glucose to sucrose ratio	7,695 European ancestry individuals	NA	FALSE	FALSE	15411165	NA	TRUE	FALSE	NA	TRUE	NA
GCST90200914	Tyrosine to pyruvate ratio	8,220 European ancestry individuals	NA	FALSE	FALSE	15429968	NA	TRUE	FALSE	NA	TRUE	NA
GCST90200915	Glucose to fructose ratio	8,214 European ancestry individuals	NA	FALSE	FALSE	15428792	NA	TRUE	FALSE	NA	TRUE	NA
GCST90200916	Fructose to sucrose ratio	7,719 European ancestry individuals	NA	FALSE	FALSE	15412103	NA	TRUE	FALSE	NA	TRUE	NA
GCST90200917	Alpha-ketobutyrate to 3-methyl-2-oxobutyrate ratio	8,133 European ancestry individuals	NA	FALSE	FALSE	15427155	NA	TRUE	FALSE	NA	TRUE	NA
GCST90200918	N-palmitoyl-sphingosine (d18:1 to 16:0) to N-palmitoyl-sphinganine (d18:0 to 16:0) ratio	8,155 European ancestry individuals	NA	FALSE	FALSE	15426479	NA	TRUE	FALSE	NA	TRUE	NA
GCST90200919	Caffeine to theophylline ratio	7,756 European ancestry individuals	NA	FALSE	FALSE	15413178	NA	TRUE	FALSE	NA	TRUE	NA
GCST90200920	Mannose to glycerol ratio	8,168 European ancestry individuals	NA	FALSE	FALSE	15429012	NA	TRUE	FALSE	NA	TRUE	NA
GCST90200921	Mannose to mannitol to sorbitol ratio	8,208 European ancestry individuals	NA	FALSE	FALSE	15427587	NA	TRUE	FALSE	NA	TRUE	NA
GCST90200922	Alpha-ketobutyrate to pyruvate ratio	8,129 European ancestry individuals	NA	FALSE	FALSE	15427204	NA	TRUE	FALSE	NA	TRUE	NA
GCST90200923	Glycerol to mannitol to sorbitol ratio	8,153 European ancestry individuals	NA	FALSE	FALSE	15427827	NA	TRUE	FALSE	NA	TRUE	NA
GCST90200924	Alpha-tocopherol to glycerol ratio	8,158 European ancestry individuals	NA	FALSE	FALSE	15427590	NA	TRUE	FALSE	NA	TRUE	NA
GCST90200925	Caffeine to theobromine ratio	7,952 European ancestry individuals	NA	FALSE	FALSE	15419917	NA	TRUE	FALSE	NA	TRUE	NA
GCST90200926	N-stearoyl-sphingosine (d18:1 to 18:0) to N-palmitoyl-sphinganine (d18:0 to 16:0) ratio	8,159 European ancestry individuals	NA	FALSE	FALSE	15427193	NA	TRUE	FALSE	NA	TRUE	NA
GCST90200927	Theophylline to theobromine ratio	7,858 European ancestry individuals	NA	FALSE	FALSE	15417883	NA	TRUE	FALSE	NA	TRUE	NA
GCST90200928	N-palmitoyl-sphingosine (d18:1 to 16:0) to N-stearoyl-sphingosine (d18:1 to 18:0) ratio	8,191 European ancestry individuals	NA	FALSE	FALSE	15428318	NA	TRUE	FALSE	NA	TRUE	NA
GCST90200929	Glycerol to carnitine ratio	8,235 European ancestry individuals	NA	FALSE	FALSE	15430150	NA	TRUE	FALSE	NA	TRUE	NA
GCST90200930	Carnitine to acetylcarnitine (C2) ratio	8,206 European ancestry individuals	NA	FALSE	FALSE	15429565	NA	TRUE	FALSE	NA	TRUE	NA
GCST90200931	Glycerol to sulfate ratio	8,176 European ancestry individuals	NA	FALSE	FALSE	15428149	NA	TRUE	FALSE	NA	TRUE	NA
GCST90200932	Glycerol to palmitoylcarnitine (C16) ratio	8,165 European ancestry individuals	NA	FALSE	FALSE	15428482	NA	TRUE	FALSE	NA	TRUE	NA
GCST90200933	Alpha-ketoglutarate to proline ratio	8,273 European ancestry individuals	NA	FALSE	FALSE	15431493	NA	TRUE	FALSE	NA	TRUE	NA
GCST90200934	Acetylcarnitine (C2) to propionylcarnitine (C3) ratio	8,200 European ancestry individuals	NA	FALSE	FALSE	15429545	NA	TRUE	FALSE	NA	TRUE	NA
GCST90200935	Carnitine to propionylcarnitine (C3) ratio	8,185 European ancestry individuals	NA	FALSE	FALSE	15428940	NA	TRUE	FALSE	NA	TRUE	NA
GCST90200936	Succinate to proline ratio	8,209 European ancestry individuals	NA	FALSE	FALSE	15428539	NA	TRUE	FALSE	NA	TRUE	NA
GCST90200937	Alpha-ketoglutarate to trans-4-hydroxyproline ratio	8,272 European ancestry individuals	NA	FALSE	FALSE	15431527	NA	TRUE	FALSE	NA	TRUE	NA
GCST90200938	Alpha-ketoglutarate to alanine ratio	8,272 European ancestry individuals	NA	FALSE	FALSE	15431458	NA	TRUE	FALSE	NA	TRUE	NA
GCST90200939	Proline to trans-4-hydroxyproline ratio	8,194 European ancestry individuals	NA	FALSE	FALSE	15427933	NA	TRUE	FALSE	NA	TRUE	NA
GCST90200940	Adenosine 5'-diphosphate (ADP) to EDTA ratio	4,563 European ancestry individuals	NA	FALSE	FALSE	15443915	NA	TRUE	FALSE	NA	TRUE	NA
GCST90200941	Succinate to trans-4-hydroxyproline ratio	8,198 European ancestry individuals	NA	FALSE	FALSE	15428627	NA	TRUE	FALSE	NA	TRUE	NA
GCST90200942	Glutamate to pyruvate ratio	8,188 European ancestry individuals	NA	FALSE	FALSE	15428851	NA	TRUE	FALSE	NA	TRUE	NA
GCST90200943	Phosphate to EDTA ratio	8,225 European ancestry individuals	NA	FALSE	FALSE	15430264	NA	TRUE	FALSE	NA	TRUE	NA
GCST90200944	Alpha-ketoglutarate to pyruvate ratio	8,272 European ancestry individuals	NA	FALSE	FALSE	15431436	NA	TRUE	FALSE	NA	TRUE	NA
GCST90200945	Adenosine 5'-monophosphate (AMP) to EDTA ratio	8,179 European ancestry individuals	NA	FALSE	FALSE	15429302	NA	TRUE	FALSE	NA	TRUE	NA
GCST90200946	Glutamate to alanine ratio	8,172 European ancestry individuals	NA	FALSE	FALSE	15426647	NA	TRUE	FALSE	NA	TRUE	NA
GCST90200947	Adenosine 5'-diphosphate (ADP) to glucose ratio	4,581 European ancestry individuals	NA	FALSE	FALSE	15444476	NA	TRUE	FALSE	NA	TRUE	NA
GCST90200948	Adenosine 5'-diphosphate (ADP) to mannitol to sorbitol ratio	4,566 European ancestry individuals	NA	FALSE	FALSE	15443473	NA	TRUE	FALSE	NA	TRUE	NA
GCST90200949	Adenosine 5'-diphosphate (ADP) to N-acetylneuraminate ratio	4,553 European ancestry individuals	NA	FALSE	FALSE	15443166	NA	TRUE	FALSE	NA	TRUE	NA
GCST90200950	Glucose to mannitol to sorbitol ratio	8,254 European ancestry individuals	NA	FALSE	FALSE	15430894	NA	TRUE	FALSE	NA	TRUE	NA
GCST90200951	Mannose to fructose ratio	8,202 European ancestry individuals	NA	FALSE	FALSE	15428285	NA	TRUE	FALSE	NA	TRUE	NA
GCST90200952	Adenosine 5'-diphosphate (ADP) to cytidine ratio	4,350 European ancestry individuals	NA	FALSE	FALSE	15431604	NA	TRUE	FALSE	NA	TRUE	NA
GCST90200953	Glucose-to-mannose ratio	8,191 European ancestry individuals	NA	FALSE	FALSE	15428816	NA	TRUE	FALSE	NA	TRUE	NA
GCST90200954	Cytidine to N-acetylneuraminate ratio	7,683 European ancestry individuals	NA	FALSE	FALSE	15408615	NA	TRUE	FALSE	NA	TRUE	NA
GCST90200955	Adenosine 5'-diphosphate (ADP) to choline phosphate ratio	4,560 European ancestry individuals	NA	FALSE	FALSE	15443531	NA	TRUE	FALSE	NA	TRUE	NA
GCST90200956	Cytidine to N-acetylglucosamine to N-acetylgalactosamine ratio	7,427 European ancestry individuals	NA	FALSE	FALSE	15397897	NA	TRUE	FALSE	NA	TRUE	NA
GCST90200957	N-acetylneuraminate to N-acetylglucosamine to N-acetylgalactosamine ratio	7,988 European ancestry individuals	NA	FALSE	FALSE	15420526	NA	TRUE	FALSE	NA	TRUE	NA
GCST90200958	Adenosine 5'-diphosphate (ADP) to choline ratio	4,560 European ancestry individuals	NA	FALSE	FALSE	15443565	NA	TRUE	FALSE	NA	TRUE	NA
GCST90200959	Choline phosphate to choline ratio	8,196 European ancestry individuals	NA	FALSE	FALSE	15428652	NA	TRUE	FALSE	NA	TRUE	NA
GCST90200960	Choline phosphate to phosphoethanolamine ratio	8,213 European ancestry individuals	NA	FALSE	FALSE	15428585	NA	TRUE	FALSE	NA	TRUE	NA
GCST90200961	Adenosine 5'-diphosphate (ADP) to ornithine ratio	4,566 European ancestry individuals	NA	FALSE	FALSE	15443986	NA	TRUE	FALSE	NA	TRUE	NA
GCST90200962	Adenosine 5'-diphosphate (ADP) to glutamine ratio	4,569 European ancestry individuals	NA	FALSE	FALSE	15444140	NA	TRUE	FALSE	NA	TRUE	NA
GCST90200963	Inosine 5'-monophosphate (IMP) to urate ratio	4,598 European ancestry individuals	NA	FALSE	FALSE	15456152	NA	TRUE	FALSE	NA	TRUE	NA
GCST90200964	Adenosine 5'-diphosphate (ADP) to 5-oxoproline ratio	4,570 European ancestry individuals	NA	FALSE	FALSE	15443910	NA	TRUE	FALSE	NA	TRUE	NA
GCST90200965	Glutamate to 5-oxoproline ratio	8,171 European ancestry individuals	NA	FALSE	FALSE	15425561	NA	TRUE	FALSE	NA	TRUE	NA
GCST90200966	Adenosine 5'-diphosphate (ADP) to uridine ratio	4,565 European ancestry individuals	NA	FALSE	FALSE	15443790	NA	TRUE	FALSE	NA	TRUE	NA
GCST90200967	Phosphate to urate ratio	8,204 European ancestry individuals	NA	FALSE	FALSE	15428926	NA	TRUE	FALSE	NA	TRUE	NA
GCST90200968	Phosphate to 5-oxoproline ratio	8,217 European ancestry individuals	NA	FALSE	FALSE	15430064	NA	TRUE	FALSE	NA	TRUE	NA
GCST90200969	Adenosine 5'-monophosphate (AMP) to N-palmitoyl-sphingosine (d18:1 to 16:0) ratio	8,188 European ancestry individuals	NA	FALSE	FALSE	15429394	NA	TRUE	FALSE	NA	TRUE	NA
GCST90200970	Adenosine 5'-monophosphate (AMP) to leucine ratio	8,201 European ancestry individuals	NA	FALSE	FALSE	15429648	NA	TRUE	FALSE	NA	TRUE	NA
GCST90200971	Leucine to phosphate ratio	8,298 European ancestry individuals	NA	FALSE	FALSE	15432369	NA	TRUE	FALSE	NA	TRUE	NA
GCST90200972	Leucine to N-palmitoyl-sphingosine (d18:1 to 16:0) ratio	8,198 European ancestry individuals	NA	FALSE	FALSE	15429307	NA	TRUE	FALSE	NA	TRUE	NA
GCST90200973	Proline to glutamate ratio	8,185 European ancestry individuals	NA	FALSE	FALSE	15428858	NA	TRUE	FALSE	NA	TRUE	NA
GCST90200974	Phosphate to proline ratio	8,241 European ancestry individuals	NA	FALSE	FALSE	15430856	NA	TRUE	FALSE	NA	TRUE	NA
GCST90200975	Arachidonate (20:4n6) to caffeine ratio	8,000 European ancestry individuals	NA	FALSE	FALSE	15422868	NA	TRUE	FALSE	NA	TRUE	NA
GCST90200976	Adenosine 5'-monophosphate (AMP) to urate ratio	8,181 European ancestry individuals	NA	FALSE	FALSE	15429221	NA	TRUE	FALSE	NA	TRUE	NA
GCST90200977	Arachidonate (20:4n6) to paraxanthine ratio	7,776 European ancestry individuals	NA	FALSE	FALSE	15414535	NA	TRUE	FALSE	NA	TRUE	NA
GCST90200978	Caffeine to paraxanthine ratio	7,873 European ancestry individuals	NA	FALSE	FALSE	15418498	NA	TRUE	FALSE	NA	TRUE	NA
GCST90200979	Arachidonate (20:4n6) to linoleate (18:2n6) ratio	8,162 European ancestry individuals	NA	FALSE	FALSE	15427706	NA	TRUE	FALSE	NA	TRUE	NA
GCST90200980	Phosphoethanolamine to choline ratio	8,204 European ancestry individuals	NA	FALSE	FALSE	15429841	NA	TRUE	FALSE	NA	TRUE	NA
GCST90200981	Caffeine to linoleate (18:2n6) ratio	7,939 European ancestry individuals	NA	FALSE	FALSE	15420085	NA	TRUE	FALSE	NA	TRUE	NA
GCST90200982	Paraxanthine to linoleate (18:2n6) ratio	7,785 European ancestry individuals	NA	FALSE	FALSE	15415908	NA	TRUE	FALSE	NA	TRUE	NA
GCST90200983	Cholesterol to linoleoyl-arachidonoyl-glycerol (18:2 to 20:4) [1] ratio	7,624 European ancestry individuals	NA	FALSE	FALSE	15401594	NA	TRUE	FALSE	NA	TRUE	NA
GCST90200984	Cholesterol to benzoate ratio	7,387 European ancestry individuals	NA	FALSE	FALSE	15399344	NA	TRUE	FALSE	NA	TRUE	NA
GCST90200985	Cholesterol to oleoyl-linoleoyl-glycerol (18:1 to 18:2) [2] ratio	7,981 European ancestry individuals	NA	FALSE	FALSE	15418813	NA	TRUE	FALSE	NA	TRUE	NA
GCST90200986	Cholesterol to linoleoyl-arachidonoyl-glycerol (18:2 to 20:4) [2] ratio	7,655 European ancestry individuals	NA	FALSE	FALSE	15403311	NA	TRUE	FALSE	NA	TRUE	NA
GCST90200987	Benzoate to oleoyl-linoleoyl-glycerol (18:1 to 18:2) [2] ratio	7,162 European ancestry individuals	NA	FALSE	FALSE	15385398	NA	TRUE	FALSE	NA	TRUE	NA
GCST90200988	Benzoate to linoleoyl-arachidonoyl-glycerol (18:2 to 20:4) [1] ratio	6,813 European ancestry individuals	NA	FALSE	FALSE	15366064	NA	TRUE	FALSE	NA	TRUE	NA
GCST90200989	Histidine to asparagine ratio	8,225 European ancestry individuals	NA	FALSE	FALSE	15429284	NA	TRUE	FALSE	NA	TRUE	NA
GCST90200990	Benzoate to linoleoyl-arachidonoyl-glycerol (18:2 to 20:4) [2] ratio	6,865 European ancestry individuals	NA	FALSE	FALSE	15370369	NA	TRUE	FALSE	NA	TRUE	NA
GCST90200991	Histidine to alanine ratio	8,233 European ancestry individuals	NA	FALSE	FALSE	15429262	NA	TRUE	FALSE	NA	TRUE	NA
GCST90200992	Alanine to asparagine ratio	8,248 European ancestry individuals	NA	FALSE	FALSE	15431174	NA	TRUE	FALSE	NA	TRUE	NA
GCST90200993	Salicylate to oxalate (ethanedioate) ratio	8,107 European ancestry individuals	NA	FALSE	FALSE	15425675	NA	TRUE	FALSE	NA	TRUE	NA
GCST90200994	Glutamine to alanine ratio	8,222 European ancestry individuals	NA	FALSE	FALSE	15429317	NA	TRUE	FALSE	NA	TRUE	NA
GCST90200995	Salicylate to taurocholate ratio	7,614 European ancestry individuals	NA	FALSE	FALSE	15406772	NA	TRUE	FALSE	NA	TRUE	NA
GCST90200996	Citrate to taurocholate ratio	7,618 European ancestry individuals	NA	FALSE	FALSE	15405901	NA	TRUE	FALSE	NA	TRUE	NA
GCST90200997	Histidine to glutamine ratio	8,223 European ancestry individuals	NA	FALSE	FALSE	15429925	NA	TRUE	FALSE	NA	TRUE	NA
GCST90200998	Salicylate to citrate ratio	8,147 European ancestry individuals	NA	FALSE	FALSE	15428164	NA	TRUE	FALSE	NA	TRUE	NA
GCST90200999	Taurocholate to oxalate (ethanedioate) ratio	7,755 European ancestry individuals	NA	FALSE	FALSE	15409864	NA	TRUE	FALSE	NA	TRUE	NA
GCST90201000	Serine to threonine ratio	8,237 European ancestry individuals	NA	FALSE	FALSE	15430937	NA	TRUE	FALSE	NA	TRUE	NA
GCST90201001	Serine to alpha-ketobutyrate ratio	8,100 European ancestry individuals	NA	FALSE	FALSE	15425506	NA	TRUE	FALSE	NA	TRUE	NA
GCST90201002	Maltose to sucrose ratio	5,984 European ancestry individuals	NA	FALSE	FALSE	15325380	NA	TRUE	FALSE	NA	TRUE	NA
GCST90201003	Glucose to N-palmitoyl-sphingosine (d18:1 to 16:0) ratio	8,173 European ancestry individuals	NA	FALSE	FALSE	15428947	NA	TRUE	FALSE	NA	TRUE	NA
GCST90201004	Glucose to N-stearoyl-sphingosine (d18:1 to 18:0) ratio	8,179 European ancestry individuals	NA	FALSE	FALSE	15428595	NA	TRUE	FALSE	NA	TRUE	NA
GCST90201005	Fructose to maltose ratio	6,307 European ancestry individuals	NA	FALSE	FALSE	15344259	NA	TRUE	FALSE	NA	TRUE	NA
GCST90201006	Alpha-ketobutyrate to 3-methyl-2-oxovalerate ratio	8,136 European ancestry individuals	NA	FALSE	FALSE	15426159	NA	TRUE	FALSE	NA	TRUE	NA
GCST90201007	Glucose to N-palmitoyl-sphinganine (d18:0 to 16:0) ratio	8,119 European ancestry individuals	NA	FALSE	FALSE	15426344	NA	TRUE	FALSE	NA	TRUE	NA
GCST90201008	Threonine to alpha-ketobutyrate ratio	8,099 European ancestry individuals	NA	FALSE	FALSE	15425776	NA	TRUE	FALSE	NA	TRUE	NA
GCST90201009	Threonine to pyruvate ratio	8,220 European ancestry individuals	NA	FALSE	FALSE	15428258	NA	TRUE	FALSE	NA	TRUE	NA
GCST90201010	Alpha-ketobutyrate to 4-methyl-2-oxopentanoate ratio	8,142 European ancestry individuals	NA	FALSE	FALSE	15425957	NA	TRUE	FALSE	NA	TRUE	NA
GCST90201011	3-methyl-2-oxovalerate to 4-methyl-2-oxopentanoate ratio	8,233 European ancestry individuals	NA	FALSE	FALSE	15429668	NA	TRUE	FALSE	NA	TRUE	NA
GCST90201012	3-methyl-2-oxovalerate to 3-methyl-2-oxobutyrate ratio	8,200 European ancestry individuals	NA	FALSE	FALSE	15429510	NA	TRUE	FALSE	NA	TRUE	NA
GCST90201013	Androsterone glucuronide to etiocholanolone glucuronide ratio	7,555 European ancestry individuals	NA	FALSE	FALSE	15398316	NA	TRUE	FALSE	NA	TRUE	NA
GCST90201014	Glucuronate to androsterone glucuronide ratio	7,804 European ancestry individuals	NA	FALSE	FALSE	15412106	NA	TRUE	FALSE	NA	TRUE	NA
GCST90201015	Bilirubin (Z,Z) to androsterone glucuronide ratio	7,888 European ancestry individuals	NA	FALSE	FALSE	15416763	NA	TRUE	FALSE	NA	TRUE	NA
GCST90201016	Bilirubin (Z,Z) to etiocholanolone glucuronide ratio	7,707 European ancestry individuals	NA	FALSE	FALSE	15409950	NA	TRUE	FALSE	NA	TRUE	NA
GCST90201017	4-methyl-2-oxopentanoate to 3-methyl-2-oxobutyrate ratio	8,224 European ancestry individuals	NA	FALSE	FALSE	15430516	NA	TRUE	FALSE	NA	TRUE	NA
GCST90201018	Bilirubin (Z,Z) to glucuronate ratio	8,103 European ancestry individuals	NA	FALSE	FALSE	15425649	NA	TRUE	FALSE	NA	TRUE	NA
GCST90201019	Glucuronate to etiocholanolone glucuronide ratio	7,631 European ancestry individuals	NA	FALSE	FALSE	15406935	NA	TRUE	FALSE	NA	TRUE	NA
GCST90201020	Paraxanthine to 5-acetylamino-6-formylamino-3-methyluracil ratio	7,388 European ancestry individuals	NA	FALSE	FALSE	15396961	NA	TRUE	FALSE	NA	TRUE	NA

## Sheet: Table S2
Detailed information about these chosen SNPs and their characteristics
SNP	effect_allele.exposure	other_allele.exposure	effect_allele.outcome	other_allele.outcome	beta.exposure	beta.outcome	eaf.exposure	eaf.outcome	remove	palindromic	ambiguous	id.outcome	chr	pos	se.outcome	samplesize.outcome	pval.outcome	outcome	originalname.outcome	outcome.deprecated	mr_keep.outcome	data_source.outcome	proxy.outcome	target_snp.outcome	proxy_snp.outcome	target_a1.outcome	target_a2.outcome	proxy_a1.outcome	proxy_a2.outcome	id.exposure	exposure	chr.exposure	pos.exposure	se.exposure	pval.exposure	samplesize.exposure	mr_keep.exposure	pval_origin.exposure	data_source.exposure	action	mr_keep
rs10000291	T	C	T	C	0.0954508	-0.0006	0.377733	0.3921	FALSE	FALSE	FALSE	finn-b-M13_FIBROMYALGIA	4	171034742	0.0544	NA	0.9916	Fibromyalgia	Fibromyalgia	Fibromyalgia || ||	TRUE	igd	NA	NA	NA	NA	NA	NA	NA	GCST90200184	3-formylindole levels	4	170113591	0.0151521	2.98559e-10	8256	TRUE	reported	textfile	2	TRUE
rs1007889	G	T	G	T	0.0741001	0.1415	0.331625	0.3707	FALSE	FALSE	FALSE	finn-b-M13_FIBROMYALGIA	22	24239243	0.0549	NA	0.00991699	Fibromyalgia	Fibromyalgia	Fibromyalgia || ||	TRUE	igd	NA	NA	NA	NA	NA	NA	NA	GCST90200184	3-formylindole levels	22	23897056	0.0155021	1.75304e-06	8256	TRUE	reported	textfile	2	TRUE
rs10839612	T	C	T	C	0.0651796	0.0231	0.51448	0.5623	FALSE	FALSE	FALSE	finn-b-M13_FIBROMYALGIA	11	6782438	0.0534	NA	0.6654	Fibromyalgia	Fibromyalgia	Fibromyalgia || ||	TRUE	igd	NA	NA	NA	NA	NA	NA	NA	GCST90200184	3-formylindole levels	11	6761207	0.0145466	7.4379e-06	8256	TRUE	reported	textfile	2	TRUE
rs11056372	A	G	A	G	-0.165652	0.1089	0.0441194	0.05555	FALSE	FALSE	FALSE	finn-b-M13_FIBROMYALGIA	12	15302837	0.1139	NA	0.3387	Fibromyalgia	Fibromyalgia	Fibromyalgia || ||	TRUE	igd	NA	NA	NA	NA	NA	NA	NA	GCST90200184	3-formylindole levels	12	15149903	0.035379	2.83795e-06	8256	TRUE	reported	textfile	2	TRUE
rs11647808	A	C	A	C	0.177857	0.0648	0.0790336	0.05836	FALSE	FALSE	FALSE	finn-b-M13_FIBROMYALGIA	16	58770881	0.1128	NA	0.5657	Fibromyalgia	Fibromyalgia	Fibromyalgia || ||	TRUE	igd	NA	NA	NA	NA	NA	NA	NA	GCST90200184	3-formylindole levels	16	58736977	0.026839	3.42996e-11	8256	TRUE	reported	textfile	2	TRUE
rs1165211	C	T	C	T	0.0995025	0.0019	0.301662	0.4038	FALSE	FALSE	FALSE	finn-b-M13_FIBROMYALGIA	6	25800922	0.0545	NA	0.9725	Fibromyalgia	Fibromyalgia	Fibromyalgia || ||	TRUE	igd	NA	NA	NA	NA	NA	NA	NA	GCST90200184	3-formylindole levels	6	25800694	0.015874	3.65099e-10	8256	TRUE	reported	textfile	2	TRUE
rs1230319	G	A	G	A	-0.198879	-0.4002	0.971829	0.9922	FALSE	FALSE	FALSE	finn-b-M13_FIBROMYALGIA	6	163898797	0.3155	NA	0.2047	Fibromyalgia	Fibromyalgia	Fibromyalgia || ||	TRUE	igd	NA	NA	NA	NA	NA	NA	NA	GCST90200184	3-formylindole levels	6	163477765	0.0448536	9.25219e-06	8256	TRUE	reported	textfile	2	TRUE
rs139251025	C	A	C	A	-0.292847	0.1818	0.0139501	0.01691	FALSE	FALSE	FALSE	finn-b-M13_FIBROMYALGIA	8	123455017	0.2126	NA	0.3926	Fibromyalgia	Fibromyalgia	Fibromyalgia || ||	TRUE	igd	NA	NA	NA	NA	NA	NA	NA	GCST90200184	3-formylindole levels	8	122442778	0.0623612	2.65317e-06	8256	TRUE	reported	textfile	2	TRUE
rs142582686	T	G	T	G	0.167542	-0.1014	0.0429182	0.03962	FALSE	FALSE	FALSE	finn-b-M13_FIBROMYALGIA	10	102764904	0.1392	NA	0.4663	Fibromyalgia	Fibromyalgia	Fibromyalgia || ||	TRUE	igd	NA	NA	NA	NA	NA	NA	NA	GCST90200184	3-formylindole levels	10	101005147	0.0362843	3.88428e-06	8256	TRUE	reported	textfile	2	TRUE
rs1431143	G	A	G	A	0.0730795	-0.082	0.708171	0.6579	FALSE	FALSE	FALSE	finn-b-M13_FIBROMYALGIA	1	190935277	0.0559	NA	0.1423	Fibromyalgia	Fibromyalgia	Fibromyalgia || ||	TRUE	igd	NA	NA	NA	NA	NA	NA	NA	GCST90200184	3-formylindole levels	1	190966147	0.0159185	4.41412e-06	8256	TRUE	reported	textfile	2	TRUE
rs143393480	T	G	T	G	0.376117	-0.4384	0.00916262	0.009215	FALSE	FALSE	FALSE	finn-b-M13_FIBROMYALGIA	18	56089858	0.2734	NA	0.1088	Fibromyalgia	Fibromyalgia	Fibromyalgia || ||	TRUE	igd	NA	NA	NA	NA	NA	NA	NA	GCST90200184	3-formylindole levels	18	58422626	0.0765881	9.06562e-07	8256	TRUE	reported	textfile	2	TRUE
rs149767042	A	G	A	G	0.214721	-0.3105	0.0237342	0.01271	FALSE	FALSE	FALSE	finn-b-M13_FIBROMYALGIA	2	234520774	0.2401	NA	0.1959	Fibromyalgia	Fibromyalgia	Fibromyalgia || ||	TRUE	igd	NA	NA	NA	NA	NA	NA	NA	GCST90200184	3-formylindole levels	2	233612128	0.0478784	7.3014e-06	8256	TRUE	reported	textfile	2	TRUE
rs182215158	C	T	C	T	0.332045	0.8613	0.0112887	0.003189	FALSE	FALSE	FALSE	finn-b-M13_FIBROMYALGIA	3	119049893	0.4893	NA	0.0783394	Fibromyalgia	Fibromyalgia	Fibromyalgia || ||	TRUE	igd	NA	NA	NA	NA	NA	NA	NA	GCST90200184	3-formylindole levels	3	119331046	0.0693486	1.68409e-06	8256	TRUE	reported	textfile	2	TRUE
rs2977995	G	A	G	A	0.275053	0.0702	0.747545	0.8248	FALSE	FALSE	FALSE	finn-b-M13_FIBROMYALGIA	9	131584245	0.0699	NA	0.315	Fibromyalgia	Fibromyalgia	Fibromyalgia || ||	TRUE	igd	NA	NA	NA	NA	NA	NA	NA	GCST90200184	3-formylindole levels	9	128821966	0.0164742	1.403e-62	8256	TRUE	reported	textfile	2	TRUE
rs4502257	T	C	T	C	0.148732	-0.0423	0.0497817	0.08238	FALSE	FALSE	FALSE	finn-b-M13_FIBROMYALGIA	17	64413396	0.0953	NA	0.6574	Fibromyalgia	Fibromyalgia	Fibromyalgia || ||	TRUE	igd	NA	NA	NA	NA	NA	NA	NA	GCST90200184	3-formylindole levels	17	66417278	0.0331573	7.2696e-06	8256	TRUE	reported	textfile	2	TRUE
rs510402	A	G	A	G	-0.195605	0.3204	0.0332808	0.01275	FALSE	FALSE	FALSE	finn-b-M13_FIBROMYALGIA	3	8175740	0.239	NA	0.1801	Fibromyalgia	Fibromyalgia	Fibromyalgia || ||	TRUE	igd	NA	NA	NA	NA	NA	NA	NA	GCST90200184	3-formylindole levels	3	8134053	0.0401108	1.07919e-06	8256	TRUE	reported	textfile	2	TRUE
rs55973025	A	G	A	G	-0.11599	-0.0501	0.0857715	0.05366	FALSE	FALSE	FALSE	finn-b-M13_FIBROMYALGIA	15	26823199	0.118	NA	0.671399	Fibromyalgia	Fibromyalgia	Fibromyalgia || ||	TRUE	igd	NA	NA	NA	NA	NA	NA	NA	GCST90200184	3-formylindole levels	15	26578052	0.0260638	8.57847e-06	8256	TRUE	reported	textfile	2	TRUE
rs5751777	T	C	T	C	0.382782	0.0362	0.590567	0.6383	FALSE	FALSE	FALSE	finn-b-M13_FIBROMYALGIA	22	24267047	0.0549	NA	0.5099	Fibromyalgia	Fibromyalgia	Fibromyalgia || ||	TRUE	igd	NA	NA	NA	NA	NA	NA	NA	GCST90200184	3-formylindole levels	22	23924860	0.0141867	2.41856e-160	8256	TRUE	reported	textfile	2	TRUE
rs57909274	A	C	A	C	-0.0772349	-0.1201	0.240042	0.1485	FALSE	FALSE	FALSE	finn-b-M13_FIBROMYALGIA	8	135240795	0.0746	NA	0.1077	Fibromyalgia	Fibromyalgia	Fibromyalgia || ||	TRUE	igd	NA	NA	NA	NA	NA	NA	NA	GCST90200184	3-formylindole levels	8	134228552	0.0170737	6.0791e-06	8256	TRUE	reported	textfile	2	TRUE
rs58487738	A	G	A	G	0.163359	0.0302	0.0475669	0.02241	FALSE	FALSE	FALSE	finn-b-M13_FIBROMYALGIA	7	146050136	0.1816	NA	0.8681	Fibromyalgia	Fibromyalgia	Fibromyalgia || ||	TRUE	igd	NA	NA	NA	NA	NA	NA	NA	GCST90200184	3-formylindole levels	7	146353044	0.0340601	1.617e-06	8256	TRUE	reported	textfile	2	TRUE
rs61814130	C	G	C	G	-0.21172	-0.6481	0.025335	0.005451	FALSE	TRUE	FALSE	finn-b-M13_FIBROMYALGIA	1	170871505	0.3649	NA	0.0757304	Fibromyalgia	Fibromyalgia	Fibromyalgia || ||	TRUE	igd	NA	NA	NA	NA	NA	NA	NA	GCST90200184	3-formylindole levels	1	170902364	0.0456747	3.56262e-06	8256	TRUE	reported	textfile	2	TRUE
rs678624	A	G	A	G	0.0764794	-0.147	0.744319	0.78	FALSE	FALSE	FALSE	finn-b-M13_FIBROMYALGIA	17	75245309	0.0639	NA	0.0215298	Fibromyalgia	Fibromyalgia	Fibromyalgia || ||	TRUE	igd	NA	NA	NA	NA	NA	NA	NA	GCST90200184	3-formylindole levels	17	77249227	0.0165692	3.91669e-06	8256	TRUE	reported	textfile	2	TRUE
rs72674255	C	T	C	T	0.262222	-0.114	0.0214702	0.02133	FALSE	FALSE	FALSE	finn-b-M13_FIBROMYALGIA	14	38066052	0.1805	NA	0.527499	Fibromyalgia	Fibromyalgia	Fibromyalgia || ||	TRUE	igd	NA	NA	NA	NA	NA	NA	NA	GCST90200184	3-formylindole levels	14	37596847	0.0502074	1.76249e-07	8256	TRUE	reported	textfile	2	TRUE
rs73141535	C	T	C	T	0.0906226	0.0396	0.154104	0.228	FALSE	FALSE	FALSE	finn-b-M13_FIBROMYALGIA	3	85652697	0.0638	NA	0.534399	Fibromyalgia	Fibromyalgia	Fibromyalgia || ||	TRUE	igd	NA	NA	NA	NA	NA	NA	NA	GCST90200184	3-formylindole levels	3	85603547	0.0203134	8.1492e-06	8256	TRUE	reported	textfile	2	TRUE
rs74805272	C	G	C	G	0.271366	1.0506	0.0146897	0.004489	FALSE	TRUE	FALSE	finn-b-M13_FIBROMYALGIA	15	88110408	0.4137	NA	0.0111099	Fibromyalgia	Fibromyalgia	Fibromyalgia || ||	TRUE	igd	NA	NA	NA	NA	NA	NA	NA	GCST90200184	3-formylindole levels	15	87567177	0.0597175	5.51547e-06	8256	TRUE	reported	textfile	2	TRUE
rs76466844	C	T	C	T	0.232961	0.226	0.0200874	0.02102	FALSE	FALSE	FALSE	finn-b-M13_FIBROMYALGIA	2	119420722	0.1882	NA	0.2297	Fibromyalgia	Fibromyalgia	Fibromyalgia || ||	TRUE	igd	NA	NA	NA	NA	NA	NA	NA	GCST90200184	3-formylindole levels	2	118663146	0.05168	6.55184e-06	8256	TRUE	reported	textfile	2	TRUE
rs77599898	A	G	A	G	0.160659	-0.2586	0.0418537	0.03455	FALSE	FALSE	FALSE	finn-b-M13_FIBROMYALGIA	16	9904728	0.1446	NA	0.0737208	Fibromyalgia	Fibromyalgia	Fibromyalgia || ||	TRUE	igd	NA	NA	NA	NA	NA	NA	NA	GCST90200184	3-formylindole levels	16	9810871	0.0360271	8.21922e-06	8256	TRUE	reported	textfile	2	TRUE
rs77904614	G	A	G	A	-0.105802	-0.0054	0.110707	0.185	FALSE	FALSE	FALSE	finn-b-M13_FIBROMYALGIA	12	132216344	0.0681	NA	0.9363	Fibromyalgia	Fibromyalgia	Fibromyalgia || ||	TRUE	igd	NA	NA	NA	NA	NA	NA	NA	GCST90200184	3-formylindole levels	12	131731799	0.0233965	6.12257e-06	8256	TRUE	reported	textfile	2	TRUE
rs7842755	C	A	C	A	0.084209	0.0028	0.181997	0.2343	FALSE	FALSE	FALSE	finn-b-M13_FIBROMYALGIA	8	6749770	0.0623	NA	0.964	Fibromyalgia	Fibromyalgia	Fibromyalgia || ||	TRUE	igd	NA	NA	NA	NA	NA	NA	NA	GCST90200184	3-formylindole levels	8	6892248	0.0189131	8.49049e-06	8256	TRUE	reported	textfile	2	TRUE
rs10001311	C	G	C	G	0.0708456	-0.0026	0.277331	0.2587	FALSE	TRUE	FALSE	finn-b-M13_FIBROMYALGIA	4	172809594	0.0603	NA	0.9653	Fibromyalgia	Fibromyalgia	Fibromyalgia || ||	TRUE	igd	NA	NA	NA	NA	NA	NA	NA	GCST90200929	Glycerol to carnitine ratio	4	171888443	0.0152002	3.14912e-06	8235	TRUE	reported	textfile	2	TRUE
rs10212037	A	G	A	G	0.141588	-0.0866	0.0472388	0.0684	FALSE	FALSE	FALSE	finn-b-M13_FIBROMYALGIA	22	26438107	0.1045	NA	0.4075	Fibromyalgia	Fibromyalgia	Fibromyalgia || ||	TRUE	igd	NA	NA	NA	NA	NA	NA	NA	GCST90200929	Glycerol to carnitine ratio	22	26042141	0.0317246	8.08096e-06	8235	TRUE	reported	textfile	2	TRUE
rs11107955	T	C	T	C	-0.112289	-0.1242	0.0983696	0.09199	FALSE	FALSE	FALSE	finn-b-M13_FIBROMYALGIA	12	95649952	0.0918	NA	0.1759	Fibromyalgia	Fibromyalgia	Fibromyalgia || ||	TRUE	igd	NA	NA	NA	NA	NA	NA	NA	GCST90200929	Glycerol to carnitine ratio	12	95256176	0.0226006	6.74978e-07	8235	TRUE	reported	textfile	2	TRUE
rs116820418	T	C	T	C	0.234256	-0.0663	0.0192237	0.01551	FALSE	FALSE	FALSE	finn-b-M13_FIBROMYALGIA	1	112622702	0.2181	NA	0.7611	Fibromyalgia	Fibromyalgia	Fibromyalgia || ||	TRUE	igd	NA	NA	NA	NA	NA	NA	NA	GCST90200929	Glycerol to carnitine ratio	1	112080080	0.0494205	2.1365e-06	8235	TRUE	reported	textfile	2	TRUE
rs116867824	C	G	C	G	0.178687	0.0849	0.0286566	0.02935	FALSE	TRUE	FALSE	finn-b-M13_FIBROMYALGIA	20	3372626	0.1595	NA	0.5945	Fibromyalgia	Fibromyalgia	Fibromyalgia || ||	TRUE	igd	NA	NA	NA	NA	NA	NA	NA	GCST90200929	Glycerol to carnitine ratio	20	3391979	0.0400034	7.9399e-06	8235	TRUE	reported	textfile	2	TRUE
rs117127331	T	C	T	C	-0.0915435	0.0642	0.126645	0.1157	FALSE	FALSE	FALSE	finn-b-M13_FIBROMYALGIA	6	148789059	0.0835	NA	0.442	Fibromyalgia	Fibromyalgia	Fibromyalgia || ||	TRUE	igd	NA	NA	NA	NA	NA	NA	NA	GCST90200929	Glycerol to carnitine ratio	6	148467923	0.0201292	5.42135e-06	8235	TRUE	reported	textfile	2	TRUE
rs1171616	T	G	T	G	-0.118696	-0.1339	0.770884	0.8403	FALSE	FALSE	FALSE	finn-b-M13_FIBROMYALGIA	10	61468589	0.0722	NA	0.0637896	Fibromyalgia	Fibromyalgia	Fibromyalgia || ||	TRUE	igd	NA	NA	NA	NA	NA	NA	NA	GCST90200929	Glycerol to carnitine ratio	10	59708831	0.0163384	3.73543e-13	8235	TRUE	reported	textfile	2	TRUE
rs117760808	G	C	G	C	0.107117	-0.0624	0.0894374	0.04007	FALSE	TRUE	FALSE	finn-b-M13_FIBROMYALGIA	6	158775018	0.1364	NA	0.647301	Fibromyalgia	Fibromyalgia	Fibromyalgia || ||	TRUE	igd	NA	NA	NA	NA	NA	NA	NA	GCST90200929	Glycerol to carnitine ratio	6	158353986	0.0235822	5.56459e-06	8235	TRUE	reported	textfile	2	TRUE
rs12505581	G	A	G	A	0.111117	0.1177	0.0949506	0.1661	FALSE	FALSE	FALSE	finn-b-M13_FIBROMYALGIA	4	152948812	0.0707	NA	0.0958208	Fibromyalgia	Fibromyalgia	Fibromyalgia || ||	TRUE	igd	NA	NA	NA	NA	NA	NA	NA	GCST90200929	Glycerol to carnitine ratio	4	152027660	0.0229816	1.33108e-06	8235	TRUE	reported	textfile	2	TRUE
rs13335139	G	A	G	A	0.779964	-0.1794	0.00170358	0.03326	FALSE	FALSE	FALSE	finn-b-M13_FIBROMYALGIA	16	19982761	0.1479	NA	0.2251	Fibromyalgia	Fibromyalgia	Fibromyalgia || ||	TRUE	igd	NA	NA	NA	NA	NA	NA	NA	GCST90200929	Glycerol to carnitine ratio	16	19971439	0.163096	1.73355e-06	8235	TRUE	reported	textfile	2	TRUE
rs146885651	T	C	T	C	1.74899	0.0296	0.000318796	0.003188	FALSE	FALSE	FALSE	finn-b-M13_FIBROMYALGIA	7	62203482	0.4995	NA	0.9527	Fibromyalgia	Fibromyalgia	Fibromyalgia || ||	TRUE	igd	NA	NA	NA	NA	NA	NA	NA	GCST90200929	Glycerol to carnitine ratio	7	62743104	0.385474	5.69938e-06	8235	TRUE	reported	textfile	2	TRUE
rs184286424	A	C	A	C	-0.224617	0.0901	0.0181918	0.03004	FALSE	FALSE	FALSE	finn-b-M13_FIBROMYALGIA	4	65540400	0.1582	NA	0.569	Fibromyalgia	Fibromyalgia	Fibromyalgia || ||	TRUE	igd	NA	NA	NA	NA	NA	NA	NA	GCST90200929	Glycerol to carnitine ratio	4	64674682	0.0502389	7.78633e-06	8235	TRUE	reported	textfile	2	TRUE
rs1888859	G	T	G	T	0.0614912	0.0819	0.49314	0.6048	FALSE	FALSE	FALSE	finn-b-M13_FIBROMYALGIA	9	12921644	0.054	NA	0.1296	Fibromyalgia	Fibromyalgia	Fibromyalgia || ||	TRUE	igd	NA	NA	NA	NA	NA	NA	NA	GCST90200929	Glycerol to carnitine ratio	9	12921645	0.0136716	6.86816e-06	8235	TRUE	reported	textfile	2	TRUE
rs2229322	T	C	T	C	0.098218	-0.1011	0.104296	0.0933	FALSE	FALSE	FALSE	finn-b-M13_FIBROMYALGIA	16	11016045	0.0915	NA	0.2689	Fibromyalgia	Fibromyalgia	Fibromyalgia || ||	TRUE	igd	NA	NA	NA	NA	NA	NA	NA	GCST90200929	Glycerol to carnitine ratio	16	10922188	0.0220845	8.69281e-06	8235	TRUE	reported	textfile	2	TRUE
rs2299168	C	T	C	T	0.215748	-0.2425	0.0200146	0.02014	FALSE	FALSE	FALSE	finn-b-M13_FIBROMYALGIA	7	81923113	0.1881	NA	0.1975	Fibromyalgia	Fibromyalgia	Fibromyalgia || ||	TRUE	igd	NA	NA	NA	NA	NA	NA	NA	GCST90200929	Glycerol to carnitine ratio	7	82293797	0.047884	6.61749e-06	8235	TRUE	reported	textfile	2	TRUE
rs2596837	C	G	C	G	-0.0713254	0.067	0.259791	0.2598	FALSE	TRUE	FALSE	finn-b-M13_FIBROMYALGIA	3	10827767	0.0603	NA	0.2666	Fibromyalgia	Fibromyalgia	Fibromyalgia || ||	TRUE	igd	NA	NA	NA	NA	NA	NA	NA	GCST90200929	Glycerol to carnitine ratio	3	10786082	0.0153932	3.5943e-06	8235	TRUE	reported	textfile	2	TRUE
rs34437475	A	G	A	G	0.0757113	0.0622	0.199538	0.2115	FALSE	FALSE	FALSE	finn-b-M13_FIBROMYALGIA	21	28274812	0.0655	NA	0.3423	Fibromyalgia	Fibromyalgia	Fibromyalgia || ||	TRUE	igd	NA	NA	NA	NA	NA	NA	NA	GCST90200929	Glycerol to carnitine ratio	21	26902493	0.0167952	6.54716e-06	8235	TRUE	reported	textfile	2	TRUE
rs35298690	C	T	C	T	0.0815	-0.0195	0.214627	0.2605	FALSE	FALSE	FALSE	finn-b-M13_FIBROMYALGIA	15	24450721	0.0606	NA	0.747699	Fibromyalgia	Fibromyalgia	Fibromyalgia || ||	TRUE	igd	NA	NA	NA	NA	NA	NA	NA	GCST90200929	Glycerol to carnitine ratio	15	24205574	0.0162866	5.61205e-07	8235	TRUE	reported	textfile	2	TRUE
rs61621666	G	A	G	A	0.145927	-0.0074	0.0522407	0.05585	FALSE	FALSE	FALSE	finn-b-M13_FIBROMYALGIA	4	38983613	0.1165	NA	0.9495	Fibromyalgia	Fibromyalgia	Fibromyalgia || ||	TRUE	igd	NA	NA	NA	NA	NA	NA	NA	GCST90200929	Glycerol to carnitine ratio	4	38981993	0.0303121	1.4783e-06	8235	TRUE	reported	textfile	2	TRUE
rs62116851	G	A	G	A	-0.109047	0.1373	0.0917547	0.0949	FALSE	FALSE	FALSE	finn-b-M13_FIBROMYALGIA	19	16187810	0.0909	NA	0.1308	Fibromyalgia	Fibromyalgia	Fibromyalgia || ||	TRUE	igd	NA	NA	NA	NA	NA	NA	NA	GCST90200929	Glycerol to carnitine ratio	19	16077000	0.0238058	4.63465e-06	8235	TRUE	reported	textfile	2	TRUE
rs7241147	C	G	C	G	-0.152141	-0.0728	0.931801	0.9128	FALSE	TRUE	FALSE	finn-b-M13_FIBROMYALGIA	18	59299665	0.0935	NA	0.436	Fibromyalgia	Fibromyalgia	Fibromyalgia || ||	TRUE	igd	NA	NA	NA	NA	NA	NA	NA	GCST90200929	Glycerol to carnitine ratio	18	61632432	0.0274311	2.91798e-08	8235	TRUE	reported	textfile	2	TRUE
rs72819866	C	T	C	T	0.115998	0.113	0.0725468	0.05963	FALSE	FALSE	FALSE	finn-b-M13_FIBROMYALGIA	2	81922171	0.1127	NA	0.3159	Fibromyalgia	Fibromyalgia	Fibromyalgia || ||	TRUE	igd	NA	NA	NA	NA	NA	NA	NA	GCST90200929	Glycerol to carnitine ratio	2	81695047	0.026146	9.14064e-06	8235	TRUE	reported	textfile	2	TRUE
rs7327786	G	A	G	A	0.102037	-0.1182	0.097912	0.09938	FALSE	FALSE	FALSE	finn-b-M13_FIBROMYALGIA	13	31579567	0.0884	NA	0.181	Fibromyalgia	Fibromyalgia	Fibromyalgia || ||	TRUE	igd	NA	NA	NA	NA	NA	NA	NA	GCST90200929	Glycerol to carnitine ratio	13	31005430	0.0224847	5.67724e-06	8235	TRUE	reported	textfile	2	TRUE
rs75960481	A	G	A	G	0.251149	0.2682	0.0158624	0.004919	FALSE	FALSE	FALSE	finn-b-M13_FIBROMYALGIA	1	181477261	0.3806	NA	0.481	Fibromyalgia	Fibromyalgia	Fibromyalgia || ||	TRUE	igd	NA	NA	NA	NA	NA	NA	NA	GCST90200929	Glycerol to carnitine ratio	1	181508125	0.0535661	2.75104e-06	8235	TRUE	reported	textfile	2	TRUE
rs7705826	G	T	G	T	-0.0959775	0.0046	0.833721	0.8635	FALSE	FALSE	FALSE	finn-b-M13_FIBROMYALGIA	5	131732456	0.0771	NA	0.9529	Fibromyalgia	Fibromyalgia	Fibromyalgia || ||	TRUE	igd	NA	NA	NA	NA	NA	NA	NA	GCST90200929	Glycerol to carnitine ratio	5	132396764	0.018058	1.06691e-07	8235	TRUE	reported	textfile	2	TRUE
rs78819701	C	T	C	T	0.171753	-0.1028	0.0366715	0.02756	FALSE	FALSE	FALSE	finn-b-M13_FIBROMYALGIA	5	81580790	0.1637	NA	0.53	Fibromyalgia	Fibromyalgia	Fibromyalgia || ||	TRUE	igd	NA	NA	NA	NA	NA	NA	NA	GCST90200929	Glycerol to carnitine ratio	5	82284971	0.0357783	1.58287e-06	8235	TRUE	reported	textfile	2	TRUE
rs79507970	C	G	C	G	0.228575	-0.0018	0.0199269	0.03591	FALSE	TRUE	FALSE	finn-b-M13_FIBROMYALGIA	12	25146471	0.145	NA	0.9901	Fibromyalgia	Fibromyalgia	Fibromyalgia || ||	TRUE	igd	NA	NA	NA	NA	NA	NA	NA	GCST90200929	Glycerol to carnitine ratio	12	24993537	0.0481656	2.07896e-06	8235	TRUE	reported	textfile	2	TRUE
rs8061003	G	A	G	A	0.066051	0.0653	0.352254	0.393	FALSE	FALSE	FALSE	finn-b-M13_FIBROMYALGIA	16	26243311	0.0542	NA	0.2284	Fibromyalgia	Fibromyalgia	Fibromyalgia || ||	TRUE	igd	NA	NA	NA	NA	NA	NA	NA	GCST90200929	Glycerol to carnitine ratio	16	26231990	0.0141994	3.29253e-06	8235	TRUE	reported	textfile	2	TRUE
rs1000136	T	C	T	C	-0.0733014	-0.0683	0.45395	0.4509	FALSE	FALSE	FALSE	finn-b-M13_FIBROMYALGIA	7	157644121	0.0532	NA	0.1992	Fibromyalgia	Fibromyalgia	Fibromyalgia || ||	TRUE	igd	NA	NA	NA	NA	NA	NA	NA	GCST90199963	17alpha-hydroxypregnanolone glucuronide levels	7	157851429	0.0156064	2.64178e-06	5582	TRUE	reported	textfile	2	TRUE
rs10814884	G	C	G	C	-0.0816704	-0.0824	0.255981	0.1263	FALSE	TRUE	FALSE	finn-b-M13_FIBROMYALGIA	9	4212359	0.0793	NA	0.2987	Fibromyalgia	Fibromyalgia	Fibromyalgia || ||	TRUE	igd	TRUE	rs10814884	rs34382833	C	G	A	C	GCST90199963	17alpha-hydroxypregnanolone glucuronide levels	9	4209822	0.0178238	4.60311e-06	5582	TRUE	reported	textfile	2	TRUE
rs113723915	C	T	C	T	0.14444	-0.0816	0.0642636	0.07092	FALSE	FALSE	FALSE	finn-b-M13_FIBROMYALGIA	3	103126008	0.1044	NA	0.4347	Fibromyalgia	Fibromyalgia	Fibromyalgia || ||	TRUE	igd	NA	NA	NA	NA	NA	NA	NA	GCST90199963	17alpha-hydroxypregnanolone glucuronide levels	3	103407164	0.0321638	7.09744e-06	5582	TRUE	reported	textfile	2	TRUE
rs114891569	T	G	T	G	0.524696	-0.0209	0.00629157	0.01043	FALSE	FALSE	FALSE	finn-b-M13_FIBROMYALGIA	3	87856246	0.2657	NA	0.9373	Fibromyalgia	Fibromyalgia	Fibromyalgia || ||	TRUE	igd	NA	NA	NA	NA	NA	NA	NA	GCST90199963	17alpha-hydroxypregnanolone glucuronide levels	3	87807096	0.0988098	1.09526e-07	5582	TRUE	reported	textfile	2	TRUE
rs11519067	T	A	T	A	0.108182	-0.0142	0.16245	0.2984	FALSE	TRUE	FALSE	finn-b-M13_FIBROMYALGIA	12	21412403	0.0582	NA	0.8068	Fibromyalgia	Fibromyalgia	Fibromyalgia || ||	TRUE	igd	NA	NA	NA	NA	NA	NA	NA	GCST90199963	17alpha-hydroxypregnanolone glucuronide levels	12	21259469	0.0212842	3.72071e-07	5582	TRUE	reported	textfile	2	TRUE
rs117242229	C	A	C	A	-0.282721	0.0627	0.0175707	0.04637	FALSE	FALSE	FALSE	finn-b-M13_FIBROMYALGIA	20	22906716	0.1262	NA	0.6192	Fibromyalgia	Fibromyalgia	Fibromyalgia || ||	TRUE	igd	NA	NA	NA	NA	NA	NA	NA	GCST90199963	17alpha-hydroxypregnanolone glucuronide levels	20	22926079	0.0592917	1.85781e-06	5582	TRUE	reported	textfile	2	TRUE
rs118134155	C	A	C	A	-0.232265	-0.1263	0.0262732	0.01407	FALSE	FALSE	FALSE	finn-b-M13_FIBROMYALGIA	15	84508221	0.2228	NA	0.5709	Fibromyalgia	Fibromyalgia	Fibromyalgia || ||	TRUE	igd	NA	NA	NA	NA	NA	NA	NA	GCST90199963	17alpha-hydroxypregnanolone glucuronide levels	15	83839469	0.0483736	1.57489e-06	5582	TRUE	reported	textfile	2	TRUE
rs12372336	G	T	G	T	-0.0757041	0.0528	0.310307	0.3688	FALSE	FALSE	FALSE	finn-b-M13_FIBROMYALGIA	12	43399180	0.0548	NA	0.3351	Fibromyalgia	Fibromyalgia	Fibromyalgia || ||	TRUE	igd	NA	NA	NA	NA	NA	NA	NA	GCST90199963	17alpha-hydroxypregnanolone glucuronide levels	12	43005377	0.0169643	8.09843e-06	5582	TRUE	reported	textfile	2	TRUE
rs12989207	T	C	T	C	0.108214	0.0189	0.132746	0.1054	FALSE	FALSE	FALSE	finn-b-M13_FIBROMYALGIA	2	65196474	0.0875	NA	0.829	Fibromyalgia	Fibromyalgia	Fibromyalgia || ||	TRUE	igd	NA	NA	NA	NA	NA	NA	NA	GCST90199963	17alpha-hydroxypregnanolone glucuronide levels	2	64969340	0.0228032	2.07921e-06	5582	TRUE	reported	textfile	2	TRUE
rs142131421	A	G	A	G	0.681648	0.0336	0.0707877	0.03197	FALSE	FALSE	FALSE	finn-b-M13_FIBROMYALGIA	11	62818385	0.1529	NA	0.8259	Fibromyalgia	Fibromyalgia	Fibromyalgia || ||	TRUE	igd	NA	NA	NA	NA	NA	NA	NA	GCST90199963	17alpha-hydroxypregnanolone glucuronide levels	11	63050913	0.0290974	2.30179e-121	5582	TRUE	reported	textfile	2	TRUE
rs145323940	C	T	C	T	-0.347083	0.0476	0.0104317	0.03534	FALSE	FALSE	FALSE	finn-b-M13_FIBROMYALGIA	3	121811013	0.1427	NA	0.7388	Fibromyalgia	Fibromyalgia	Fibromyalgia || ||	TRUE	igd	NA	NA	NA	NA	NA	NA	NA	GCST90199963	17alpha-hydroxypregnanolone glucuronide levels	3	122092166	0.0758077	4.68388e-06	5582	TRUE	reported	textfile	2	TRUE
rs147320780	C	G	C	G	-0.183845	-0.1689	0.0368544	0.02967	FALSE	TRUE	FALSE	finn-b-M13_FIBROMYALGIA	9	99137417	0.1575	NA	0.2833	Fibromyalgia	Fibromyalgia	Fibromyalgia || ||	TRUE	igd	NA	NA	NA	NA	NA	NA	NA	GCST90199963	17alpha-hydroxypregnanolone glucuronide levels	9	96375135	0.0414856	9.35671e-06	5582	TRUE	reported	textfile	2	TRUE
rs149001017	A	G	A	G	0.615174	0.0528	0.00323044	0.05065	FALSE	FALSE	FALSE	finn-b-M13_FIBROMYALGIA	8	54814664	0.1205	NA	0.6609	Fibromyalgia	Fibromyalgia	Fibromyalgia || ||	TRUE	igd	NA	NA	NA	NA	NA	NA	NA	GCST90199963	17alpha-hydroxypregnanolone glucuronide levels	8	53902104	0.137459	7.62907e-06	5582	TRUE	reported	textfile	2	TRUE
rs1574706	G	A	G	A	0.221115	0.4106	0.974909	0.9799	FALSE	FALSE	FALSE	finn-b-M13_FIBROMYALGIA	2	138470344	0.1886	NA	0.0294503	Fibromyalgia	Fibromyalgia	Fibromyalgia || ||	TRUE	igd	NA	NA	NA	NA	NA	NA	NA	GCST90199963	17alpha-hydroxypregnanolone glucuronide levels	2	137712774	0.0499215	9.45612e-06	5582	TRUE	reported	textfile	2	TRUE
rs17678628	C	T	C	T	0.195708	0.1326	0.0409262	0.01354	FALSE	FALSE	FALSE	finn-b-M13_FIBROMYALGIA	2	144561374	0.2306	NA	0.5652	Fibromyalgia	Fibromyalgia	Fibromyalgia || ||	TRUE	igd	NA	NA	NA	NA	NA	NA	NA	GCST90199963	17alpha-hydroxypregnanolone glucuronide levels	2	143803805	0.0398777	9.21537e-07	5582	TRUE	reported	textfile	2	TRUE
rs17719944	G	A	G	A	0.130072	-0.0039	0.0879488	0.06937	FALSE	FALSE	FALSE	finn-b-M13_FIBROMYALGIA	17	26729453	0.1052	NA	0.9706	Fibromyalgia	Fibromyalgia	Fibromyalgia || ||	TRUE	igd	NA	NA	NA	NA	NA	NA	NA	GCST90199963	17alpha-hydroxypregnanolone glucuronide levels	17	28402435	0.0277789	2.83536e-06	5582	TRUE	reported	textfile	2	TRUE
rs183318671	T	G	T	G	0.462386	-0.1329	0.00756484	0.01124	FALSE	FALSE	FALSE	finn-b-M13_FIBROMYALGIA	15	69482033	0.2526	NA	0.5988	Fibromyalgia	Fibromyalgia	Fibromyalgia || ||	TRUE	igd	NA	NA	NA	NA	NA	NA	NA	GCST90199963	17alpha-hydroxypregnanolone glucuronide levels	15	69189694	0.0903333	3.07692e-07	5582	TRUE	reported	textfile	2	TRUE
rs191145320	T	C	T	C	-0.300691	0.72	0.013533	0.006941	FALSE	FALSE	FALSE	finn-b-M13_FIBROMYALGIA	1	215973135	0.3185	NA	0.0237799	Fibromyalgia	Fibromyalgia	Fibromyalgia || ||	TRUE	igd	NA	NA	NA	NA	NA	NA	NA	GCST90199963	17alpha-hydroxypregnanolone glucuronide levels	1	215799793	0.0671361	7.50524e-06	5582	TRUE	reported	textfile	2	TRUE
rs2433279	G	T	G	T	-0.109732	0.1988	0.884817	0.8981	FALSE	FALSE	FALSE	finn-b-M13_FIBROMYALGIA	1	93907909	0.0877	NA	0.0233798	Fibromyalgia	Fibromyalgia	Fibromyalgia || ||	TRUE	igd	NA	NA	NA	NA	NA	NA	NA	GCST90199963	17alpha-hydroxypregnanolone glucuronide levels	1	93442352	0.0243898	6.82455e-06	5582	TRUE	reported	textfile	2	TRUE
rs2468872	A	G	A	G	-0.0764143	0.062	0.555169	0.4733	FALSE	FALSE	FALSE	finn-b-M13_FIBROMYALGIA	8	114933628	0.053	NA	0.2415	Fibromyalgia	Fibromyalgia	Fibromyalgia || ||	TRUE	igd	NA	NA	NA	NA	NA	NA	NA	GCST90199963	17alpha-hydroxypregnanolone glucuronide levels	8	113921399	0.0158682	1.46774e-06	5582	TRUE	reported	textfile	2	TRUE
rs37482	A	G	A	G	0.111391	0.056	0.117377	0.1433	FALSE	FALSE	FALSE	finn-b-M13_FIBROMYALGIA	5	89841346	0.0756	NA	0.4592	Fibromyalgia	Fibromyalgia	Fibromyalgia || ||	TRUE	igd	NA	NA	NA	NA	NA	NA	NA	GCST90199963	17alpha-hydroxypregnanolone glucuronide levels	5	90545529	0.0236813	2.55425e-06	5582	TRUE	reported	textfile	2	TRUE
rs3785912	T	C	T	C	-0.0787216	-0.0473	0.342628	0.416	FALSE	FALSE	FALSE	finn-b-M13_FIBROMYALGIA	17	48756937	0.0537	NA	0.3787	Fibromyalgia	Fibromyalgia	Fibromyalgia || ||	TRUE	igd	NA	NA	NA	NA	NA	NA	NA	GCST90199963	17alpha-hydroxypregnanolone glucuronide levels	17	50679576	0.0165527	1.97643e-06	5582	TRUE	reported	textfile	2	TRUE
rs4713420	T	G	T	G	-0.100635	-0.1211	0.162442	0.1563	FALSE	FALSE	FALSE	finn-b-M13_FIBROMYALGIA	6	30993567	0.0737	NA	0.1004	Fibromyalgia	Fibromyalgia	Fibromyalgia || ||	TRUE	igd	NA	NA	NA	NA	NA	NA	NA	GCST90199963	17alpha-hydroxypregnanolone glucuronide levels	6	31025790	0.0211232	1.89609e-06	5582	TRUE	reported	textfile	2	TRUE
rs4961068	G	C	G	C	-0.0737245	0.0076	0.369639	0.3971	FALSE	TRUE	FALSE	finn-b-M13_FIBROMYALGIA	8	87077530	0.0542	NA	0.8887	Fibromyalgia	Fibromyalgia	Fibromyalgia || ||	TRUE	igd	NA	NA	NA	NA	NA	NA	NA	GCST90199963	17alpha-hydroxypregnanolone glucuronide levels	8	86065301	0.0162084	5.40214e-06	5582	TRUE	reported	textfile	2	TRUE
rs540582	C	T	C	T	-0.0993954	0.0577	0.581372	0.6158	FALSE	FALSE	FALSE	finn-b-M13_FIBROMYALGIA	11	63079770	0.0543	NA	0.2879	Fibromyalgia	Fibromyalgia	Fibromyalgia || ||	TRUE	igd	NA	NA	NA	NA	NA	NA	NA	GCST90199963	17alpha-hydroxypregnanolone glucuronide levels	11	63312298	0.0157566	2.82314e-10	5582	TRUE	reported	textfile	2	TRUE
rs60628976	C	G	C	G	0.101168	-0.0744	0.13666	0.1468	FALSE	TRUE	FALSE	finn-b-M13_FIBROMYALGIA	17	76321433	0.0755	NA	0.3243	Fibromyalgia	Fibromyalgia	Fibromyalgia || ||	TRUE	igd	NA	NA	NA	NA	NA	NA	NA	GCST90199963	17alpha-hydroxypregnanolone glucuronide levels	17	78325352	0.0226224	7.74873e-06	5582	TRUE	reported	textfile	2	TRUE
rs60865673	C	T	C	T	0.120178	-0.0346	0.0920981	0.163	FALSE	FALSE	FALSE	finn-b-M13_FIBROMYALGIA	11	45619645	0.0721	NA	0.630999	Fibromyalgia	Fibromyalgia	Fibromyalgia || ||	TRUE	igd	NA	NA	NA	NA	NA	NA	NA	GCST90199963	17alpha-hydroxypregnanolone glucuronide levels	11	45598095	0.0268285	7.48208e-06	5582	TRUE	reported	textfile	2	TRUE
rs61983784	T	A	T	A	-0.10892	-0.09	0.118098	0.131	FALSE	TRUE	FALSE	finn-b-M13_FIBROMYALGIA	14	50349971	0.0788	NA	0.2531	Fibromyalgia	Fibromyalgia	Fibromyalgia || ||	TRUE	igd	NA	NA	NA	NA	NA	NA	NA	GCST90199963	17alpha-hydroxypregnanolone glucuronide levels	14	49883253	0.0241175	6.29499e-06	5582	TRUE	reported	textfile	2	TRUE
rs62084022	T	C	T	C	-0.0804557	0.0053	0.304011	0.3379	FALSE	FALSE	FALSE	finn-b-M13_FIBROMYALGIA	18	3583716	0.0565	NA	0.9253	Fibromyalgia	Fibromyalgia	Fibromyalgia || ||	TRUE	igd	NA	NA	NA	NA	NA	NA	NA	GCST90199963	17alpha-hydroxypregnanolone glucuronide levels	18	3583718	0.017639	5.08527e-06	5582	TRUE	reported	textfile	2	TRUE
rs62315354	T	A	T	A	0.110999	-0.0006	0.112929	0.1471	FALSE	TRUE	FALSE	finn-b-M13_FIBROMYALGIA	4	67989316	0.0748	NA	0.9938	Fibromyalgia	Fibromyalgia	Fibromyalgia || ||	TRUE	igd	NA	NA	NA	NA	NA	NA	NA	GCST90199963	17alpha-hydroxypregnanolone glucuronide levels	4	67123598	0.0246931	6.95197e-06	5582	TRUE	reported	textfile	2	TRUE
rs7171867	G	T	G	T	-0.115576	0.0183	0.105424	0.1576	FALSE	FALSE	FALSE	finn-b-M13_FIBROMYALGIA	15	90434413	0.0731	NA	0.8028	Fibromyalgia	Fibromyalgia	Fibromyalgia || ||	TRUE	igd	NA	NA	NA	NA	NA	NA	NA	GCST90199963	17alpha-hydroxypregnanolone glucuronide levels	15	89891181	0.0252425	4.6806e-06	5582	TRUE	reported	textfile	2	TRUE
rs73194752	T	C	T	C	-0.103398	-0.0459	0.140129	0.1485	FALSE	FALSE	FALSE	finn-b-M13_FIBROMYALGIA	4	4914578	0.0747	NA	0.5386	Fibromyalgia	Fibromyalgia	Fibromyalgia || ||	TRUE	igd	NA	NA	NA	NA	NA	NA	NA	GCST90199963	17alpha-hydroxypregnanolone glucuronide levels	4	4912851	0.0224304	4.03185e-06	5582	TRUE	reported	textfile	2	TRUE
rs9527	T	C	T	C	0.0891597	-0.1027	0.246771	0.2147	FALSE	FALSE	FALSE	finn-b-M13_FIBROMYALGIA	10	104623578	0.0646	NA	0.1117	Fibromyalgia	Fibromyalgia	Fibromyalgia || ||	TRUE	igd	NA	NA	NA	NA	NA	NA	NA	GCST90199963	17alpha-hydroxypregnanolone glucuronide levels	10	102863821	0.0179007	6.33283e-07	5582	TRUE	reported	textfile	2	TRUE
rs1000141	T	C	T	C	0.0734663	0.0837	0.513366	0.457	FALSE	FALSE	FALSE	finn-b-M13_FIBROMYALGIA	2	234242347	0.0531	NA	0.1147	Fibromyalgia	Fibromyalgia	Fibromyalgia || ||	TRUE	igd	NA	NA	NA	NA	NA	NA	NA	GCST90201011	3-methyl-2-oxovalerate to 4-methyl-2-oxopentanoate ratio	2	233333701	0.0154065	1.85579e-06	8233	TRUE	reported	textfile	2	TRUE
rs10860876	C	T	C	T	-0.109361	-0.0681	0.131258	0.105	FALSE	FALSE	FALSE	finn-b-M13_FIBROMYALGIA	12	102953076	0.0876	NA	0.4366	Fibromyalgia	Fibromyalgia	Fibromyalgia || ||	TRUE	igd	NA	NA	NA	NA	NA	NA	NA	GCST90201011	3-methyl-2-oxovalerate to 4-methyl-2-oxopentanoate ratio	12	102559298	0.0227493	1.53024e-06	8233	TRUE	reported	textfile	2	TRUE
rs113732730	T	G	T	G	0.161064	-0.2441	0.0488924	0.04069	FALSE	FALSE	FALSE	finn-b-M13_FIBROMYALGIA	3	73986513	0.1367	NA	0.0743002	Fibromyalgia	Fibromyalgia	Fibromyalgia || ||	TRUE	igd	TRUE	rs113732730	rs1526724	T	G	T	C	GCST90201011	3-methyl-2-oxovalerate to 4-methyl-2-oxopentanoate ratio	3	73920008	0.0357767	6.73436e-06	8233	TRUE	reported	textfile	2	TRUE
rs113957107	C	G	C	G	-0.332548	0.1669	0.0110744	0.01392	FALSE	TRUE	FALSE	finn-b-M13_FIBROMYALGIA	5	174166449	0.234	NA	0.4756	Fibromyalgia	Fibromyalgia	Fibromyalgia || ||	TRUE	igd	NA	NA	NA	NA	NA	NA	NA	GCST90201011	3-methyl-2-oxovalerate to 4-methyl-2-oxopentanoate ratio	5	174739446	0.0735684	6.17633e-06	8233	TRUE	reported	textfile	2	TRUE
rs116919726	A	C	A	C	0.122495	0.0021	0.0873296	0.05819	FALSE	FALSE	FALSE	finn-b-M13_FIBROMYALGIA	8	112790441	0.1143	NA	0.9855	Fibromyalgia	Fibromyalgia	Fibromyalgia || ||	TRUE	igd	NA	NA	NA	NA	NA	NA	NA	GCST90201011	3-methyl-2-oxovalerate to 4-methyl-2-oxopentanoate ratio	8	111778212	0.0274008	7.80343e-06	8233	TRUE	reported	textfile	2	TRUE
rs117005096	G	C	G	C	-0.209421	-0.1165	0.0297663	0.02721	FALSE	TRUE	FALSE	finn-b-M13_FIBROMYALGIA	8	2314259	0.1654	NA	0.4813	Fibromyalgia	Fibromyalgia	Fibromyalgia || ||	TRUE	igd	NA	NA	NA	NA	NA	NA	NA	GCST90201011	3-methyl-2-oxovalerate to 4-methyl-2-oxopentanoate ratio	8	2353538	0.0453745	3.9236e-06	8233	TRUE	reported	textfile	2	TRUE
rs12417993	C	T	C	T	-0.0885577	0.0399	0.186986	0.1691	FALSE	FALSE	FALSE	finn-b-M13_FIBROMYALGIA	11	128318491	0.0708	NA	0.572499	Fibromyalgia	Fibromyalgia	Fibromyalgia || ||	TRUE	igd	NA	NA	NA	NA	NA	NA	NA	GCST90201011	3-methyl-2-oxovalerate to 4-methyl-2-oxopentanoate ratio	11	128448596	0.0197457	7.29481e-06	8233	TRUE	reported	textfile	2	TRUE
rs12737655	A	G	A	G	-0.148867	-0.1207	0.0568951	0.07529	FALSE	FALSE	FALSE	finn-b-M13_FIBROMYALGIA	1	52846324	0.0997	NA	0.226	Fibromyalgia	Fibromyalgia	Fibromyalgia || ||	TRUE	igd	NA	NA	NA	NA	NA	NA	NA	GCST90201011	3-methyl-2-oxovalerate to 4-methyl-2-oxopentanoate ratio	1	52380652	0.0332605	7.61288e-06	8233	TRUE	reported	textfile	2	TRUE
rs13381382	T	C	T	C	-0.0748896	0.0158	0.352041	0.3078	FALSE	FALSE	FALSE	finn-b-M13_FIBROMYALGIA	18	43144653	0.0572	NA	0.7826	Fibromyalgia	Fibromyalgia	Fibromyalgia || ||	TRUE	igd	NA	NA	NA	NA	NA	NA	NA	GCST90201011	3-methyl-2-oxovalerate to 4-methyl-2-oxopentanoate ratio	18	45564688	0.0162225	3.90436e-06	8233	TRUE	reported	textfile	2	TRUE
rs141588879	G	A	G	A	0.178622	-0.0442	0.0373535	0.02149	FALSE	FALSE	FALSE	finn-b-M13_FIBROMYALGIA	4	159910794	0.1845	NA	0.8105	Fibromyalgia	Fibromyalgia	Fibromyalgia || ||	TRUE	igd	NA	NA	NA	NA	NA	NA	NA	GCST90201011	3-methyl-2-oxovalerate to 4-methyl-2-oxopentanoate ratio	4	158989642	0.0401743	8.74053e-06	8233	TRUE	reported	textfile	2	TRUE
rs142722792	T	C	T	C	0.227479	-0.1019	0.0272163	0.02237	FALSE	FALSE	FALSE	finn-b-M13_FIBROMYALGIA	11	82603234	0.1786	NA	0.5682	Fibromyalgia	Fibromyalgia	Fibromyalgia || ||	TRUE	igd	NA	NA	NA	NA	NA	NA	NA	GCST90201011	3-methyl-2-oxovalerate to 4-methyl-2-oxopentanoate ratio	11	82892192	0.0473106	1.52294e-06	8233	TRUE	reported	textfile	2	TRUE
rs146630123	T	G	T	G	-0.324337	0.0185	0.0140501	0.05547	FALSE	FALSE	FALSE	finn-b-M13_FIBROMYALGIA	10	112714933	0.1147	NA	0.8717	Fibromyalgia	Fibromyalgia	Fibromyalgia || ||	TRUE	igd	NA	NA	NA	NA	NA	NA	NA	GCST90201011	3-methyl-2-oxovalerate to 4-methyl-2-oxopentanoate ratio	10	110955175	0.0655226	7.42135e-07	8233	TRUE	reported	textfile	2	TRUE
rs191675623	T	C	T	C	0.145929	0.0753	0.0706432	0.04785	FALSE	FALSE	FALSE	finn-b-M13_FIBROMYALGIA	3	1715149	0.1275	NA	0.5549	Fibromyalgia	Fibromyalgia	Fibromyalgia || ||	TRUE	igd	NA	NA	NA	NA	NA	NA	NA	GCST90201011	3-methyl-2-oxovalerate to 4-methyl-2-oxopentanoate ratio	3	1673465	0.0305448	1.77437e-06	8233	TRUE	reported	textfile	2	TRUE
rs2164029	G	A	G	A	-0.0733352	-0.0056	0.36929	0.3371	FALSE	FALSE	FALSE	finn-b-M13_FIBROMYALGIA	18	20831009	0.0562	NA	0.9204	Fibromyalgia	Fibromyalgia	Fibromyalgia || ||	TRUE	igd	NA	NA	NA	NA	NA	NA	NA	GCST90201011	3-methyl-2-oxovalerate to 4-methyl-2-oxopentanoate ratio	18	23251045	0.0162919	6.75265e-06	8233	TRUE	reported	textfile	2	TRUE
rs2395845	A	C	A	C	-0.121801	-0.02	0.0902297	0.08926	FALSE	FALSE	FALSE	finn-b-M13_FIBROMYALGIA	2	222993315	0.094	NA	0.8315	Fibromyalgia	Fibromyalgia	Fibromyalgia || ||	TRUE	igd	NA	NA	NA	NA	NA	NA	NA	GCST90201011	3-methyl-2-oxovalerate to 4-methyl-2-oxopentanoate ratio	2	222128596	0.0269548	6.22104e-06	8233	TRUE	reported	textfile	2	TRUE
rs4689805	A	G	A	G	0.0821165	0.0087	0.228364	0.261	FALSE	FALSE	FALSE	finn-b-M13_FIBROMYALGIA	4	7625907	0.0605	NA	0.8854	Fibromyalgia	Fibromyalgia	Fibromyalgia || ||	TRUE	igd	NA	NA	NA	NA	NA	NA	NA	GCST90201011	3-methyl-2-oxovalerate to 4-methyl-2-oxopentanoate ratio	4	7624180	0.0183677	7.79603e-06	8233	TRUE	reported	textfile	2	TRUE
rs4697549	C	G	C	G	-0.163242	-0.1105	0.0468103	0.04398	FALSE	TRUE	FALSE	finn-b-M13_FIBROMYALGIA	4	25115598	0.1284	NA	0.3895	Fibromyalgia	Fibromyalgia	Fibromyalgia || ||	TRUE	igd	NA	NA	NA	NA	NA	NA	NA	GCST90201011	3-methyl-2-oxovalerate to 4-methyl-2-oxopentanoate ratio	4	25113976	0.0362064	6.52443e-06	8233	TRUE	reported	textfile	2	TRUE
rs73102110	C	A	C	A	-0.219967	0.1863	0.0270419	0.01835	FALSE	FALSE	FALSE	finn-b-M13_FIBROMYALGIA	3	69546748	0.1992	NA	0.3496	Fibromyalgia	Fibromyalgia	Fibromyalgia || ||	TRUE	igd	NA	NA	NA	NA	NA	NA	NA	GCST90201011	3-methyl-2-oxovalerate to 4-methyl-2-oxopentanoate ratio	3	69497597	0.0475091	3.6565e-06	8233	TRUE	reported	textfile	2	TRUE
rs73225991	A	G	A	G	-0.095493	-0.0316	0.156934	0.1344	FALSE	FALSE	FALSE	finn-b-M13_FIBROMYALGIA	4	12604788	0.0777	NA	0.684	Fibromyalgia	Fibromyalgia	Fibromyalgia || ||	TRUE	igd	NA	NA	NA	NA	NA	NA	NA	GCST90201011	3-methyl-2-oxovalerate to 4-methyl-2-oxopentanoate ratio	4	12603164	0.0212534	7.02045e-06	8233	TRUE	reported	textfile	2	TRUE
rs75204119	A	G	A	G	0.280451	-0.0099	0.015205	0.007483	FALSE	FALSE	FALSE	finn-b-M13_FIBROMYALGIA	11	94307891	0.3065	NA	0.9741	Fibromyalgia	Fibromyalgia	Fibromyalgia || ||	TRUE	igd	NA	NA	NA	NA	NA	NA	NA	GCST90201011	3-methyl-2-oxovalerate to 4-methyl-2-oxopentanoate ratio	11	94574725	0.0629614	8.41518e-06	8233	TRUE	reported	textfile	2	TRUE
rs76178213	T	C	T	C	-0.279018	0.4811	0.0150262	0.005103	FALSE	FALSE	FALSE	finn-b-M13_FIBROMYALGIA	20	58552871	0.3814	NA	0.2072	Fibromyalgia	Fibromyalgia	Fibromyalgia || ||	TRUE	igd	NA	NA	NA	NA	NA	NA	NA	GCST90201011	3-methyl-2-oxovalerate to 4-methyl-2-oxopentanoate ratio	20	59977816	0.0630683	9.68677e-06	8233	TRUE	reported	textfile	2	TRUE
rs7779635	C	T	C	T	-0.0756897	0.0084	0.713041	0.7101	FALSE	FALSE	FALSE	finn-b-M13_FIBROMYALGIA	7	80532504	0.0583	NA	0.8851	Fibromyalgia	Fibromyalgia	Fibromyalgia || ||	TRUE	igd	NA	NA	NA	NA	NA	NA	NA	GCST90201011	3-methyl-2-oxovalerate to 4-methyl-2-oxopentanoate ratio	7	80903188	0.0168741	7.27274e-06	8233	TRUE	reported	textfile	2	TRUE
rs8030711	C	T	C	T	-0.0949177	0.08	0.153818	0.09668	FALSE	FALSE	FALSE	finn-b-M13_FIBROMYALGIA	15	88491843	0.0895	NA	0.3714	Fibromyalgia	Fibromyalgia	Fibromyalgia || ||	TRUE	igd	NA	NA	NA	NA	NA	NA	NA	GCST90201011	3-methyl-2-oxovalerate to 4-methyl-2-oxopentanoate ratio	15	87948612	0.0213963	9.15717e-06	8233	TRUE	reported	textfile	2	TRUE
rs1000156	G	A	G	A	-0.0892357	0.0029	0.20765	0.1408	FALSE	FALSE	FALSE	finn-b-M13_FIBROMYALGIA	8	103951061	0.0766	NA	0.9695	Fibromyalgia	Fibromyalgia	Fibromyalgia || ||	TRUE	igd	NA	NA	NA	NA	NA	NA	NA	GCST90200290	Glycerate levels	8	102938833	0.0188882	2.30793e-06	8222	TRUE	reported	textfile	2	TRUE
rs1025628	A	G	A	G	0.151408	0.0067	0.93801	0.9435	FALSE	FALSE	FALSE	finn-b-M13_FIBROMYALGIA	15	96384028	0.1151	NA	0.9536	Fibromyalgia	Fibromyalgia	Fibromyalgia || ||	TRUE	igd	NA	NA	NA	NA	NA	NA	NA	GCST90200290	Glycerate levels	15	95840799	0.0322248	2.62096e-06	8222	TRUE	reported	textfile	2	TRUE
rs112748757	T	G	T	G	-0.248552	0.0846	0.0205263	0.03317	FALSE	FALSE	FALSE	finn-b-M13_FIBROMYALGIA	20	49614902	0.1511	NA	0.5754	Fibromyalgia	Fibromyalgia	Fibromyalgia || ||	TRUE	igd	NA	NA	NA	NA	NA	NA	NA	GCST90200290	Glycerate levels	20	50998365	0.0544456	4.99134e-06	8222	TRUE	reported	textfile	2	TRUE
rs1133621	T	G	T	G	0.107914	-0.0237	0.885566	0.8118	FALSE	FALSE	FALSE	finn-b-M13_FIBROMYALGIA	8	126761459	0.0681	NA	0.7279	Fibromyalgia	Fibromyalgia	Fibromyalgia || ||	TRUE	igd	NA	NA	NA	NA	NA	NA	NA	GCST90200290	Glycerate levels	8	125749215	0.0240638	7.30891e-06	8222	TRUE	reported	textfile	2	TRUE
rs11662283	T	A	T	A	0.10185	0.1011	0.162632	0.1745	FALSE	TRUE	FALSE	finn-b-M13_FIBROMYALGIA	18	4726361	0.0695	NA	0.1457	Fibromyalgia	Fibromyalgia	Fibromyalgia || ||	TRUE	igd	NA	NA	NA	NA	NA	NA	NA	GCST90200290	Glycerate levels	18	4726361	0.0209162	1.11931e-06	8222	TRUE	reported	textfile	2	TRUE
rs117731450	A	G	A	G	-0.244065	0.2673	0.0197224	0.011	FALSE	FALSE	FALSE	finn-b-M13_FIBROMYALGIA	13	31078796	0.2575	NA	0.2993	Fibromyalgia	Fibromyalgia	Fibromyalgia || ||	TRUE	igd	NA	NA	NA	NA	NA	NA	NA	GCST90200290	Glycerate levels	13	30504659	0.0551232	9.52758e-06	8222	TRUE	reported	textfile	2	TRUE
rs138250602	G	T	G	T	-0.156885	-0.0955	0.0491492	0.03908	FALSE	FALSE	FALSE	finn-b-M13_FIBROMYALGIA	4	22124722	0.1378	NA	0.4884	Fibromyalgia	Fibromyalgia	Fibromyalgia || ||	TRUE	igd	NA	NA	NA	NA	NA	NA	NA	GCST90200290	Glycerate levels	4	22123099	0.0354448	9.59188e-06	8222	TRUE	reported	textfile	2	TRUE
rs141097695	A	G	A	G	-0.222358	-0.0979	0.0260141	0.01654	FALSE	FALSE	FALSE	finn-b-M13_FIBROMYALGIA	9	31229951	0.2127	NA	0.645199	Fibromyalgia	Fibromyalgia	Fibromyalgia || ||	TRUE	igd	NA	NA	NA	NA	NA	NA	NA	GCST90200290	Glycerate levels	9	31229953	0.0485143	4.57614e-06	8222	TRUE	reported	textfile	2	TRUE
rs1449141	C	A	C	A	-0.0794245	-0.0654	0.28231	0.3501	FALSE	FALSE	FALSE	finn-b-M13_FIBROMYALGIA	2	232383884	0.0555	NA	0.2384	Fibromyalgia	Fibromyalgia	Fibromyalgia || ||	TRUE	igd	NA	NA	NA	NA	NA	NA	NA	GCST90200290	Glycerate levels	2	231519173	0.0170941	3.37909e-06	8222	TRUE	reported	textfile	2	TRUE
rs145856120	T	C	T	C	-0.281891	-0.1306	0.0165559	0.02457	FALSE	FALSE	FALSE	finn-b-M13_FIBROMYALGIA	20	10169926	0.1723	NA	0.4487	Fibromyalgia	Fibromyalgia	Fibromyalgia || ||	TRUE	igd	NA	NA	NA	NA	NA	NA	NA	GCST90200290	Glycerate levels	20	10189278	0.0605964	3.28818e-06	8222	TRUE	reported	textfile	2	TRUE
rs149160598	A	G	A	G	-0.317679	0.1038	0.0164095	0.01881	FALSE	FALSE	FALSE	finn-b-M13_FIBROMYALGIA	2	102397896	0.1961	NA	0.5967	Fibromyalgia	Fibromyalgia	Fibromyalgia || ||	TRUE	igd	NA	NA	NA	NA	NA	NA	NA	GCST90200290	Glycerate levels	2	101781434	0.06091	1.83279e-07	8222	TRUE	reported	textfile	2	TRUE
rs149266774	T	G	T	G	-0.257202	-0.04	0.0194861	0.1158	FALSE	FALSE	FALSE	finn-b-M13_FIBROMYALGIA	2	103861814	0.0834	NA	0.6312	Fibromyalgia	Fibromyalgia	Fibromyalgia || ||	TRUE	igd	NA	NA	NA	NA	NA	NA	NA	GCST90200290	Glycerate levels	2	103245356	0.0560545	4.4659e-06	8222	TRUE	reported	textfile	2	TRUE
rs183630170	C	A	C	A	0.305391	0.0745	0.0134093	0.03843	FALSE	FALSE	FALSE	finn-b-M13_FIBROMYALGIA	7	91883738	0.1382	NA	0.589899	Fibromyalgia	Fibromyalgia	Fibromyalgia || ||	TRUE	igd	NA	NA	NA	NA	NA	NA	NA	GCST90200290	Glycerate levels	7	92254424	0.0668327	4.88928e-06	8222	TRUE	reported	textfile	2	TRUE
rs2279694	C	T	C	T	0.0737581	0.0781	0.671949	0.5896	FALSE	FALSE	FALSE	finn-b-M13_FIBROMYALGIA	11	133520207	0.0546	NA	0.1521	Fibromyalgia	Fibromyalgia	Fibromyalgia || ||	TRUE	igd	NA	NA	NA	NA	NA	NA	NA	GCST90200290	Glycerate levels	11	133650312	0.016588	8.72972e-06	8222	TRUE	reported	textfile	2	TRUE
rs2394872	C	A	C	A	-0.129378	0.0516	0.0928764	0.08208	FALSE	FALSE	FALSE	finn-b-M13_FIBROMYALGIA	7	98212745	0.0963	NA	0.5923	Fibromyalgia	Fibromyalgia	Fibromyalgia || ||	TRUE	igd	NA	NA	NA	NA	NA	NA	NA	GCST90200290	Glycerate levels	7	98583433	0.0263373	8.99835e-07	8222	TRUE	reported	textfile	2	TRUE
rs2540970	C	T	C	T	0.0731367	-0.1272	0.339805	0.3111	FALSE	FALSE	FALSE	finn-b-M13_FIBROMYALGIA	2	65255099	0.0577	NA	0.0274499	Fibromyalgia	Fibromyalgia	Fibromyalgia || ||	TRUE	igd	NA	NA	NA	NA	NA	NA	NA	GCST90200290	Glycerate levels	2	65027965	0.0162715	6.96423e-06	8222	TRUE	reported	textfile	2	TRUE
rs3733487	A	C	A	C	-0.309579	0.1286	0.986892	0.9911	FALSE	FALSE	FALSE	finn-b-M13_FIBROMYALGIA	4	71684416	0.288	NA	0.6553	Fibromyalgia	Fibromyalgia	Fibromyalgia || ||	TRUE	igd	NA	NA	NA	NA	NA	NA	NA	GCST90200290	Glycerate levels	4	70818699	0.0682205	5.68122e-06	8222	TRUE	reported	textfile	2	TRUE
rs3814027	T	C	T	C	0.0822872	0.0282	0.525613	0.5105	FALSE	FALSE	FALSE	finn-b-M13_FIBROMYALGIA	2	112641854	0.0533	NA	0.596	Fibromyalgia	Fibromyalgia	Fibromyalgia || ||	TRUE	igd	NA	NA	NA	NA	NA	NA	NA	GCST90200290	Glycerate levels	2	111884277	0.0158679	2.15145e-07	8222	TRUE	reported	textfile	2	TRUE
rs4523130	G	A	G	A	-0.188253	-0.6936	0.0338044	0.01929	FALSE	FALSE	FALSE	finn-b-M13_FIBROMYALGIA	6	6815354	0.2055	NA	0.000738295	Fibromyalgia	Fibromyalgia	Fibromyalgia || ||	TRUE	igd	NA	NA	NA	NA	NA	NA	NA	GCST90200290	Glycerate levels	6	6815121	0.0424813	9.36148e-06	8222	TRUE	reported	textfile	2	TRUE
rs55836930	G	T	G	T	0.230304	-0.0455	0.0248808	0.01996	FALSE	FALSE	FALSE	finn-b-M13_FIBROMYALGIA	12	119418504	0.1923	NA	0.8128	Fibromyalgia	Fibromyalgia	Fibromyalgia || ||	TRUE	igd	NA	NA	NA	NA	NA	NA	NA	GCST90200290	Glycerate levels	12	118980699	0.0491907	2.84279e-06	8222	TRUE	reported	textfile	2	TRUE
rs62381616	T	C	T	C	-0.275712	0.2553	0.0307627	0.0301	FALSE	FALSE	FALSE	finn-b-M13_FIBROMYALGIA	5	138681033	0.1551	NA	0.0997011	Fibromyalgia	Fibromyalgia	Fibromyalgia || ||	TRUE	igd	NA	NA	NA	NA	NA	NA	NA	GCST90200290	Glycerate levels	5	139345344	0.044263	4.69543e-10	8222	TRUE	reported	textfile	2	TRUE
rs6554022	A	C	A	C	-0.116404	0.0419	0.107208	0.04595	FALSE	FALSE	FALSE	finn-b-M13_FIBROMYALGIA	4	32327311	0.128	NA	0.743599	Fibromyalgia	Fibromyalgia	Fibromyalgia || ||	TRUE	igd	NA	NA	NA	NA	NA	NA	NA	GCST90200290	Glycerate levels	4	32325689	0.0250231	3.28947e-06	8222	TRUE	reported	textfile	2	TRUE
rs756874	G	A	G	A	0.074803	0.0287	0.366725	0.3002	FALSE	FALSE	FALSE	finn-b-M13_FIBROMYALGIA	15	91717237	0.0578	NA	0.619599	Fibromyalgia	Fibromyalgia	Fibromyalgia || ||	TRUE	igd	NA	NA	NA	NA	NA	NA	NA	GCST90200290	Glycerate levels	15	91174007	0.0159593	2.77104e-06	8222	TRUE	reported	textfile	2	TRUE
rs76004499	G	C	G	C	0.243397	0.2549	0.0201396	0.02581	FALSE	TRUE	FALSE	finn-b-M13_FIBROMYALGIA	5	176705865	0.1663	NA	0.1255	Fibromyalgia	Fibromyalgia	Fibromyalgia || ||	TRUE	igd	NA	NA	NA	NA	NA	NA	NA	GCST90200290	Glycerate levels	5	177278864	0.054567	8.17654e-06	8222	TRUE	reported	textfile	2	TRUE
rs77814441	T	C	T	C	-0.20709	0.0324	0.029125	0.01391	FALSE	FALSE	FALSE	finn-b-M13_FIBROMYALGIA	15	58217085	0.234	NA	0.8899	Fibromyalgia	Fibromyalgia	Fibromyalgia || ||	TRUE	igd	NA	NA	NA	NA	NA	NA	NA	GCST90200290	Glycerate levels	15	57924887	0.0457112	5.88729e-06	8222	TRUE	reported	textfile	2	TRUE
rs9808439	T	C	T	C	-0.197404	-0.0963	0.0316533	0.01567	FALSE	FALSE	FALSE	finn-b-M13_FIBROMYALGIA	2	218676321	0.2196	NA	0.660999	Fibromyalgia	Fibromyalgia	Fibromyalgia || ||	TRUE	igd	NA	NA	NA	NA	NA	NA	NA	GCST90200290	Glycerate levels	2	217811598	0.0438208	6.64367e-06	8222	TRUE	reported	textfile	2	TRUE
rs10003807	C	T	C	T	-0.214142	-0.0914	0.0380592	0.06434	FALSE	FALSE	FALSE	finn-b-M13_FIBROMYALGIA	4	181182365	0.1083	NA	0.3987	Fibromyalgia	Fibromyalgia	Fibromyalgia || ||	TRUE	igd	NA	NA	NA	NA	NA	NA	NA	GCST90200007	3-methoxycatechol sulfate (2) levels	4	180261212	0.0423463	4.2609e-07	7286	TRUE	reported	textfile	2	TRUE
rs10499279	G	C	G	C	-0.0858818	-0.0071	0.251825	0.2331	FALSE	TRUE	FALSE	finn-b-M13_FIBROMYALGIA	6	156943416	0.0628	NA	0.9104	Fibromyalgia	Fibromyalgia	Fibromyalgia || ||	TRUE	igd	NA	NA	NA	NA	NA	NA	NA	GCST90200007	3-methoxycatechol sulfate (2) levels	6	156622282	0.0185596	3.70374e-06	7286	TRUE	reported	textfile	2	TRUE
rs116896552	T	C	T	C	0.182836	0.1326	0.045542	0.03807	FALSE	FALSE	FALSE	finn-b-M13_FIBROMYALGIA	14	53170560	0.1383	NA	0.3377	Fibromyalgia	Fibromyalgia	Fibromyalgia || ||	TRUE	igd	NA	NA	NA	NA	NA	NA	NA	GCST90200007	3-methoxycatechol sulfate (2) levels	14	52703842	0.0387157	2.32944e-06	7286	TRUE	reported	textfile	2	TRUE
rs11724679	G	A	G	A	-0.152964	0.3302	0.0704986	0.06535	FALSE	FALSE	FALSE	finn-b-M13_FIBROMYALGIA	4	143800361	0.1093	NA	0.00252703	Fibromyalgia	Fibromyalgia	Fibromyalgia || ||	TRUE	igd	NA	NA	NA	NA	NA	NA	NA	GCST90200007	3-methoxycatechol sulfate (2) levels	4	142879208	0.0318999	1.62568e-06	7286	TRUE	reported	textfile	2	TRUE
rs117725273	G	C	G	C	-0.290084	0.1824	0.0207787	0.0152	FALSE	TRUE	FALSE	finn-b-M13_FIBROMYALGIA	9	100302615	0.2213	NA	0.4099	Fibromyalgia	Fibromyalgia	Fibromyalgia || ||	TRUE	igd	NA	NA	NA	NA	NA	NA	NA	GCST90200007	3-methoxycatechol sulfate (2) levels	9	97540333	0.0573731	4.27937e-07	7286	TRUE	reported	textfile	2	TRUE
rs117959567	T	G	T	G	0.466179	-0.0364	0.00650339	0.01127	FALSE	FALSE	FALSE	finn-b-M13_FIBROMYALGIA	16	1240070	0.2494	NA	0.8841	Fibromyalgia	Fibromyalgia	Fibromyalgia || ||	TRUE	igd	NA	NA	NA	NA	NA	NA	NA	GCST90200007	3-methoxycatechol sulfate (2) levels	16	1190070	0.100818	3.76447e-06	7286	TRUE	reported	textfile	2	TRUE
rs118101266	T	G	T	G	0.411941	0.2771	0.00806785	0.01968	FALSE	FALSE	FALSE	finn-b-M13_FIBROMYALGIA	7	52136993	0.1914	NA	0.1475	Fibromyalgia	Fibromyalgia	Fibromyalgia || ||	TRUE	igd	NA	NA	NA	NA	NA	NA	NA	GCST90200007	3-methoxycatechol sulfate (2) levels	7	52069297	0.0914875	6.7094e-06	7286	TRUE	reported	textfile	2	TRUE
rs141596626	A	G	A	G	0.500991	0.2175	0.00647026	0.01502	FALSE	FALSE	FALSE	finn-b-M13_FIBROMYALGIA	18	38324237	0.2168	NA	0.3159	Fibromyalgia	Fibromyalgia	Fibromyalgia || ||	TRUE	igd	NA	NA	NA	NA	NA	NA	NA	GCST90200007	3-methoxycatechol sulfate (2) levels	18	40744273	0.100791	6.67559e-07	7286	TRUE	reported	textfile	2	TRUE
rs142232430	A	G	A	G	0.397639	0.1998	0.0108003	0.006041	FALSE	FALSE	FALSE	finn-b-M13_FIBROMYALGIA	3	159037670	0.3673	NA	0.5865	Fibromyalgia	Fibromyalgia	Fibromyalgia || ||	TRUE	igd	NA	NA	NA	NA	NA	NA	NA	GCST90200007	3-methoxycatechol sulfate (2) levels	3	159319881	0.0789083	4.67333e-07	7286	TRUE	reported	textfile	2	TRUE
rs144886872	G	A	G	A	0.418993	0.4951	0.0116391	0.002628	FALSE	FALSE	FALSE	finn-b-M13_FIBROMYALGIA	7	135692555	0.5265	NA	0.347	Fibromyalgia	Fibromyalgia	Fibromyalgia || ||	TRUE	igd	NA	NA	NA	NA	NA	NA	NA	GCST90200007	3-methoxycatechol sulfate (2) levels	7	136007807	0.0763485	4.06754e-08	7286	TRUE	reported	textfile	2	TRUE
rs2027378	G	T	G	T	0.0986684	0.0633	0.83805	0.8276	FALSE	FALSE	FALSE	finn-b-M13_FIBROMYALGIA	10	6940378	0.0693	NA	0.3614	Fibromyalgia	Fibromyalgia	Fibromyalgia || ||	TRUE	igd	NA	NA	NA	NA	NA	NA	NA	GCST90200007	3-methoxycatechol sulfate (2) levels	10	6898416	0.022123	8.19651e-06	7286	TRUE	reported	textfile	2	TRUE
rs2112460	A	G	A	G	0.0767993	-0.0345	0.487295	0.5028	FALSE	FALSE	FALSE	finn-b-M13_FIBROMYALGIA	19	13590412	0.0532	NA	0.516799	Fibromyalgia	Fibromyalgia	Fibromyalgia || ||	TRUE	igd	NA	NA	NA	NA	NA	NA	NA	GCST90200007	3-methoxycatechol sulfate (2) levels	19	13479598	0.0162018	2.13543e-06	7286	TRUE	reported	textfile	2	TRUE
rs3128372	G	C	G	C	0.0818875	-0.0654	0.650523	0.6318	FALSE	TRUE	FALSE	finn-b-M13_FIBROMYALGIA	1	112857586	0.0551	NA	0.2351	Fibromyalgia	Fibromyalgia	Fibromyalgia || ||	TRUE	igd	NA	NA	NA	NA	NA	NA	NA	GCST90200007	3-methoxycatechol sulfate (2) levels	1	112314964	0.0179258	4.92103e-06	7286	TRUE	reported	textfile	2	TRUE
rs4611006	C	T	C	T	0.0782356	-0.0077	0.316411	0.2921	FALSE	FALSE	FALSE	finn-b-M13_FIBROMYALGIA	1	223545114	0.0585	NA	0.895	Fibromyalgia	Fibromyalgia	Fibromyalgia || ||	TRUE	igd	NA	NA	NA	NA	NA	NA	NA	GCST90200007	3-methoxycatechol sulfate (2) levels	1	223371772	0.0175621	8.39715e-06	7286	TRUE	reported	textfile	2	TRUE
rs4945580	G	C	G	C	-0.169831	0.1639	0.0500484	0.06659	FALSE	TRUE	FALSE	finn-b-M13_FIBROMYALGIA	6	117578012	0.1066	NA	0.1244	Fibromyalgia	Fibromyalgia	Fibromyalgia || ||	TRUE	igd	NA	NA	NA	NA	NA	NA	NA	GCST90200007	3-methoxycatechol sulfate (2) levels	6	117256849	0.0374888	5.89364e-06	7286	TRUE	reported	textfile	2	TRUE
rs56681315	T	C	T	C	0.120369	-0.0073	0.111959	0.1426	FALSE	FALSE	FALSE	finn-b-M13_FIBROMYALGIA	14	33910777	0.0764	NA	0.9234	Fibromyalgia	Fibromyalgia	Fibromyalgia || ||	TRUE	igd	NA	NA	NA	NA	NA	NA	NA	GCST90200007	3-methoxycatechol sulfate (2) levels	14	33441571	0.0264445	5.32027e-06	7286	TRUE	reported	textfile	2	TRUE
rs62273053	A	G	A	G	0.335042	0.4418	0.0126722	0.003121	FALSE	FALSE	FALSE	finn-b-M13_FIBROMYALGIA	3	146577200	0.48	NA	0.3574	Fibromyalgia	Fibromyalgia	Fibromyalgia || ||	TRUE	igd	NA	NA	NA	NA	NA	NA	NA	GCST90200007	3-methoxycatechol sulfate (2) levels	3	146859413	0.0728876	4.29242e-06	7286	TRUE	reported	textfile	2	TRUE
rs62428058	A	G	A	G	0.134476	-0.1332	0.0877132	0.07829	FALSE	FALSE	FALSE	finn-b-M13_FIBROMYALGIA	6	122052090	0.0989	NA	0.178	Fibromyalgia	Fibromyalgia	Fibromyalgia || ||	TRUE	igd	NA	NA	NA	NA	NA	NA	NA	GCST90200007	3-methoxycatechol sulfate (2) levels	6	121730944	0.0291841	4.06839e-06	7286	TRUE	reported	textfile	2	TRUE
rs71523652	T	A	T	A	0.0909097	0.0612	0.239586	0.2807	FALSE	TRUE	FALSE	finn-b-M13_FIBROMYALGIA	8	4767483	0.0588	NA	0.2978	Fibromyalgia	Fibromyalgia	Fibromyalgia || ||	TRUE	igd	NA	NA	NA	NA	NA	NA	NA	GCST90200007	3-methoxycatechol sulfate (2) levels	8	4909961	0.0191394	2.03557e-06	7286	TRUE	reported	textfile	2	TRUE
rs73006493	C	T	C	T	-0.149264	-0.0358	0.0623104	0.0339	FALSE	FALSE	FALSE	finn-b-M13_FIBROMYALGIA	11	109237272	0.1498	NA	0.8114	Fibromyalgia	Fibromyalgia	Fibromyalgia || ||	TRUE	igd	NA	NA	NA	NA	NA	NA	NA	GCST90200007	3-methoxycatechol sulfate (2) levels	11	109366546	0.0336821	9.35548e-06	7286	TRUE	reported	textfile	2	TRUE
rs7665238	A	G	A	G	0.0854025	0.0573	0.747536	0.8319	FALSE	FALSE	FALSE	finn-b-M13_FIBROMYALGIA	4	124329732	0.0713	NA	0.422	Fibromyalgia	Fibromyalgia	Fibromyalgia || ||	TRUE	igd	NA	NA	NA	NA	NA	NA	NA	GCST90200007	3-methoxycatechol sulfate (2) levels	4	123408577	0.0187425	5.19845e-06	7286	TRUE	reported	textfile	2	TRUE
rs7935436	C	T	C	T	0.0796945	-0.0028	0.338448	0.3629	FALSE	FALSE	FALSE	finn-b-M13_FIBROMYALGIA	11	81258898	0.0553	NA	0.9602	Fibromyalgia	Fibromyalgia	Fibromyalgia || ||	TRUE	igd	NA	NA	NA	NA	NA	NA	NA	GCST90200007	3-methoxycatechol sulfate (2) levels	11	81547856	0.0172088	3.63849e-06	7286	TRUE	reported	textfile	2	TRUE
rs10004304	T	C	T	C	0.0952775	0.0521	0.183266	0.2597	FALSE	FALSE	FALSE	finn-b-M13_FIBROMYALGIA	4	5344005	0.0603	NA	0.3875	Fibromyalgia	Fibromyalgia	Fibromyalgia || ||	TRUE	igd	NA	NA	NA	NA	NA	NA	NA	GCST90200623	X-24241 levels	4	5342278	0.0202523	2.54455e-06	8053	TRUE	reported	textfile	2	TRUE
rs1050152	T	C	T	C	-0.107399	-0.0279	0.430152	0.3173	FALSE	FALSE	FALSE	finn-b-M13_FIBROMYALGIA	5	131676320	0.0569	NA	0.6234	Fibromyalgia	Fibromyalgia	Fibromyalgia || ||	TRUE	igd	NA	NA	NA	NA	NA	NA	NA	GCST90200623	X-24241 levels	5	132340627	0.0156755	7.31396e-12	8053	TRUE	reported	textfile	2	TRUE
rs10929472	A	G	A	G	0.081388	0.0178	0.251137	0.2656	FALSE	FALSE	FALSE	finn-b-M13_FIBROMYALGIA	2	7374639	0.0601	NA	0.767201	Fibromyalgia	Fibromyalgia	Fibromyalgia || ||	TRUE	igd	NA	NA	NA	NA	NA	NA	NA	GCST90200623	X-24241 levels	2	7234508	0.0179791	5.98794e-06	8053	TRUE	reported	textfile	2	TRUE
rs112552538	T	C	T	C	-0.414126	0.1319	0.00807057	0.003154	FALSE	FALSE	FALSE	finn-b-M13_FIBROMYALGIA	6	58709815	0.4832	NA	0.7848	Fibromyalgia	Fibromyalgia	Fibromyalgia || ||	TRUE	igd	NA	NA	NA	NA	NA	NA	NA	GCST90200623	X-24241 levels	6	58383537	0.0873488	2.12598e-06	8053	TRUE	reported	textfile	2	TRUE
rs115566627	C	T	C	T	-0.285575	0.0108	0.0156757	0.01738	FALSE	FALSE	FALSE	finn-b-M13_FIBROMYALGIA	6	13772330	0.2021	NA	0.9572	Fibromyalgia	Fibromyalgia	Fibromyalgia || ||	TRUE	igd	NA	NA	NA	NA	NA	NA	NA	GCST90200623	X-24241 levels	6	13772098	0.0626037	5.07556e-06	8053	TRUE	reported	textfile	2	TRUE
rs1171614	C	T	C	T	0.163222	-0.1412	0.770896	0.8413	FALSE	FALSE	FALSE	finn-b-M13_FIBROMYALGIA	10	61469538	0.0724	NA	0.0513499	Fibromyalgia	Fibromyalgia	Fibromyalgia || ||	TRUE	igd	NA	NA	NA	NA	NA	NA	NA	GCST90200623	X-24241 levels	10	59709780	0.0188775	5.31586e-18	8053	TRUE	reported	textfile	2	TRUE
rs12208357	T	C	T	C	-0.190394	0.264	0.069401	0.05711	FALSE	FALSE	FALSE	finn-b-M13_FIBROMYALGIA	6	160543148	0.115	NA	0.02168	Fibromyalgia	Fibromyalgia	Fibromyalgia || ||	TRUE	igd	NA	NA	NA	NA	NA	NA	NA	GCST90200623	X-24241 levels	6	160122116	0.0303378	3.47857e-10	8053	TRUE	reported	textfile	2	TRUE
rs12427077	G	A	G	A	-0.0971084	-0.0305	0.164684	0.1368	FALSE	FALSE	FALSE	finn-b-M13_FIBROMYALGIA	12	13659461	0.0774	NA	0.6938	Fibromyalgia	Fibromyalgia	Fibromyalgia || ||	TRUE	igd	NA	NA	NA	NA	NA	NA	NA	GCST90200623	X-24241 levels	12	13506527	0.0210017	3.76719e-06	8053	TRUE	reported	textfile	2	TRUE
rs12448913	G	C	G	C	0.391067	0.6058	0.00837919	0.002242	FALSE	TRUE	FALSE	finn-b-M13_FIBROMYALGIA	16	5188789	0.5714	NA	0.2891	Fibromyalgia	Fibromyalgia	Fibromyalgia || ||	TRUE	igd	NA	NA	NA	NA	NA	NA	NA	GCST90200623	X-24241 levels	16	5138788	0.0857395	5.08854e-06	8053	TRUE	reported	textfile	2	TRUE
rs12903952	T	C	T	C	0.0961508	-0.0193	0.189405	0.2014	FALSE	FALSE	FALSE	finn-b-M13_FIBROMYALGIA	15	93706481	0.0661	NA	0.7704	Fibromyalgia	Fibromyalgia	Fibromyalgia || ||	TRUE	igd	NA	NA	NA	NA	NA	NA	NA	GCST90200623	X-24241 levels	15	93163252	0.0201602	1.84834e-06	8053	TRUE	reported	textfile	2	TRUE
rs139160	C	T	C	T	0.0776784	-0.0896	0.720477	0.635	FALSE	FALSE	FALSE	finn-b-M13_FIBROMYALGIA	22	44597504	0.055	NA	0.1032	Fibromyalgia	Fibromyalgia	Fibromyalgia || ||	TRUE	igd	NA	NA	NA	NA	NA	NA	NA	GCST90200623	X-24241 levels	22	44201624	0.0174627	8.65777e-06	8053	TRUE	reported	textfile	2	TRUE
rs142991896	C	G	C	G	-0.330456	-0.7352	0.011028	0.002342	FALSE	TRUE	FALSE	finn-b-M13_FIBROMYALGIA	19	28700140	0.5795	NA	0.2046	Fibromyalgia	Fibromyalgia	Fibromyalgia || ||	TRUE	igd	NA	NA	NA	NA	NA	NA	NA	GCST90200623	X-24241 levels	19	28209233	0.0743796	8.8782e-06	8053	TRUE	reported	textfile	2	TRUE
rs148908721	G	A	G	A	-0.252437	0.1233	0.0198817	0.02538	FALSE	FALSE	FALSE	finn-b-M13_FIBROMYALGIA	7	95563596	0.1711	NA	0.4709	Fibromyalgia	Fibromyalgia	Fibromyalgia || ||	TRUE	igd	NA	NA	NA	NA	NA	NA	NA	GCST90200623	X-24241 levels	7	95934284	0.0559488	6.42413e-06	8053	TRUE	reported	textfile	2	TRUE
rs151285077	A	G	A	G	0.131983	-0.0393	0.0751057	0.06559	FALSE	FALSE	FALSE	finn-b-M13_FIBROMYALGIA	17	40570421	0.1083	NA	0.717	Fibromyalgia	Fibromyalgia	Fibromyalgia || ||	TRUE	igd	NA	NA	NA	NA	NA	NA	NA	GCST90200623	X-24241 levels	17	42418403	0.029454	7.43049e-06	8053	TRUE	reported	textfile	2	TRUE
rs181481755	T	C	T	C	-0.357481	-0.0614	0.00951966	0.04518	FALSE	FALSE	FALSE	finn-b-M13_FIBROMYALGIA	15	55891119	0.1259	NA	0.6256	Fibromyalgia	Fibromyalgia	Fibromyalgia || ||	TRUE	igd	NA	NA	NA	NA	NA	NA	NA	GCST90200623	X-24241 levels	15	55598921	0.0798063	7.48703e-06	8053	TRUE	reported	textfile	2	TRUE
rs187428247	A	G	A	G	-0.350229	0.2278	0.0111111	0.02674	FALSE	FALSE	FALSE	finn-b-M13_FIBROMYALGIA	11	101025230	0.1661	NA	0.1703	Fibromyalgia	Fibromyalgia	Fibromyalgia || ||	TRUE	igd	NA	NA	NA	NA	NA	NA	NA	GCST90200623	X-24241 levels	11	101154499	0.0743746	2.48959e-06	8053	TRUE	reported	textfile	2	TRUE
rs34059508	A	G	A	G	-0.33036	0.0774	0.0256028	0.009991	FALSE	FALSE	FALSE	finn-b-M13_FIBROMYALGIA	6	160575837	0.2731	NA	0.777	Fibromyalgia	Fibromyalgia	Fibromyalgia || ||	TRUE	igd	NA	NA	NA	NA	NA	NA	NA	GCST90200623	X-24241 levels	6	160154805	0.0489551	1.49658e-11	8053	TRUE	reported	textfile	2	TRUE
rs424029	A	G	A	G	-0.178391	-0.0124	0.0430884	0.04895	FALSE	FALSE	FALSE	finn-b-M13_FIBROMYALGIA	3	85010039	0.1217	NA	0.9187	Fibromyalgia	Fibromyalgia	Fibromyalgia || ||	TRUE	igd	NA	NA	NA	NA	NA	NA	NA	GCST90200623	X-24241 levels	3	84960888	0.0379512	2.59491e-06	8053	TRUE	reported	textfile	2	TRUE
rs60177389	C	A	C	A	0.146051	-0.0289	0.0617138	0.05257	FALSE	FALSE	FALSE	finn-b-M13_FIBROMYALGIA	18	26990134	0.1183	NA	0.8068	Fibromyalgia	Fibromyalgia	Fibromyalgia || ||	TRUE	igd	NA	NA	NA	NA	NA	NA	NA	GCST90200623	X-24241 levels	18	29410169	0.0319185	4.74494e-06	8053	TRUE	reported	textfile	2	TRUE
rs7234351	A	C	A	C	0.0721651	0.0251	0.462574	0.5564	FALSE	FALSE	FALSE	finn-b-M13_FIBROMYALGIA	18	65686626	0.0533	NA	0.637901	Fibromyalgia	Fibromyalgia	Fibromyalgia || ||	TRUE	igd	NA	NA	NA	NA	NA	NA	NA	GCST90200623	X-24241 levels	18	68019389	0.0159329	5.91753e-06	8053	TRUE	reported	textfile	2	TRUE
rs743022	C	G	C	G	0.0749477	0.0311	0.310321	0.2959	FALSE	TRUE	FALSE	finn-b-M13_FIBROMYALGIA	20	23401129	0.0581	NA	0.593	Fibromyalgia	Fibromyalgia	Fibromyalgia || ||	TRUE	igd	NA	NA	NA	NA	NA	NA	NA	GCST90200623	X-24241 levels	20	23420492	0.0169106	9.33641e-06	8053	TRUE	reported	textfile	2	TRUE
rs75747525	A	G	A	G	0.0905312	-0.0581	0.183348	0.1616	FALSE	FALSE	FALSE	finn-b-M13_FIBROMYALGIA	2	185456897	0.072	NA	0.4204	Fibromyalgia	Fibromyalgia	Fibromyalgia || ||	TRUE	igd	NA	NA	NA	NA	NA	NA	NA	GCST90200623	X-24241 levels	2	184592170	0.0203929	9.02317e-06	8053	TRUE	reported	textfile	2	TRUE
rs77010315	A	C	A	C	-0.391863	0.5533	0.0120572	0.004652	FALSE	FALSE	FALSE	finn-b-M13_FIBROMYALGIA	5	150723155	0.3791	NA	0.1444	Fibromyalgia	Fibromyalgia	Fibromyalgia || ||	TRUE	igd	NA	NA	NA	NA	NA	NA	NA	GCST90200623	X-24241 levels	5	151343594	0.0711089	3.57303e-08	8053	TRUE	reported	textfile	2	TRUE
rs79824243	T	A	T	A	-0.125929	0.019	0.0814261	0.1002	FALSE	TRUE	FALSE	finn-b-M13_FIBROMYALGIA	13	86156638	0.0886	NA	0.8302	Fibromyalgia	Fibromyalgia	Fibromyalgia || ||	TRUE	igd	NA	NA	NA	NA	NA	NA	NA	GCST90200623	X-24241 levels	13	85582503	0.0283872	9.15874e-06	8053	TRUE	reported	textfile	2	TRUE
rs10004542	G	A	G	A	0.0814848	0.0372	0.340258	0.3072	FALSE	FALSE	FALSE	finn-b-M13_FIBROMYALGIA	4	4720455	0.0575	NA	0.5175	Fibromyalgia	Fibromyalgia	Fibromyalgia || ||	TRUE	igd	NA	NA	NA	NA	NA	NA	NA	GCST90199632	Tartarate levels	4	4718728	0.0176888	4.09376e-06	7099	TRUE	reported	textfile	2	TRUE
rs10247649	G	A	G	A	-0.0826258	0.0116	0.344838	0.3108	FALSE	FALSE	FALSE	finn-b-M13_FIBROMYALGIA	7	95216247	0.0573	NA	0.8393	Fibromyalgia	Fibromyalgia	Fibromyalgia || ||	TRUE	igd	NA	NA	NA	NA	NA	NA	NA	GCST90199632	Tartarate levels	7	95586935	0.0178465	3.65988e-06	7099	TRUE	reported	textfile	2	TRUE
rs10945808	T	C	T	C	-0.130904	0.0026	0.0976838	0.07748	FALSE	FALSE	FALSE	finn-b-M13_FIBROMYALGIA	6	162720194	0.1009	NA	0.9797	Fibromyalgia	Fibromyalgia	Fibromyalgia || ||	TRUE	igd	NA	NA	NA	NA	NA	NA	NA	GCST90199632	Tartarate levels	6	162299162	0.0285309	4.47212e-06	7099	TRUE	reported	textfile	2	TRUE
rs115272033	C	T	C	T	-0.170179	0.0116	0.0492451	0.0551	FALSE	FALSE	FALSE	finn-b-M13_FIBROMYALGIA	6	31850807	0.1154	NA	0.9201	Fibromyalgia	Fibromyalgia	Fibromyalgia || ||	TRUE	igd	NA	NA	NA	NA	NA	NA	NA	GCST90199632	Tartarate levels	6	31883030	0.0381431	8.13534e-06	7099	TRUE	reported	textfile	2	TRUE
rs116626434	A	G	A	G	-0.149526	0.0081	0.0721524	0.09144	FALSE	FALSE	FALSE	finn-b-M13_FIBROMYALGIA	1	83641377	0.092	NA	0.9297	Fibromyalgia	Fibromyalgia	Fibromyalgia || ||	TRUE	igd	NA	NA	NA	NA	NA	NA	NA	GCST90199632	Tartarate levels	1	83175694	0.0320676	3.11891e-06	7099	TRUE	reported	textfile	2	TRUE
rs117483011	A	G	A	G	-0.157832	-0.0852	0.0595121	0.06907	FALSE	FALSE	FALSE	finn-b-M13_FIBROMYALGIA	8	3196910	0.1043	NA	0.4144	Fibromyalgia	Fibromyalgia	Fibromyalgia || ||	TRUE	igd	NA	NA	NA	NA	NA	NA	NA	GCST90199632	Tartarate levels	8	3339388	0.0354548	8.52127e-06	7099	TRUE	reported	textfile	2	TRUE
rs13089230	A	G	A	G	0.0825424	0.0448	0.621953	0.6057	FALSE	FALSE	FALSE	finn-b-M13_FIBROMYALGIA	3	177554204	0.0541	NA	0.4077	Fibromyalgia	Fibromyalgia	Fibromyalgia || ||	TRUE	igd	NA	NA	NA	NA	NA	NA	NA	GCST90199632	Tartarate levels	3	177836416	0.0175787	2.65821e-06	7099	TRUE	reported	textfile	2	TRUE
rs138430505	C	T	C	T	0.285026	-0.2979	0.0178748	0.01521	FALSE	FALSE	FALSE	finn-b-M13_FIBROMYALGIA	2	26178621	0.2221	NA	0.1799	Fibromyalgia	Fibromyalgia	Fibromyalgia || ||	TRUE	igd	NA	NA	NA	NA	NA	NA	NA	GCST90199632	Tartarate levels	2	25955752	0.0624394	4.9989e-06	7099	TRUE	reported	textfile	2	TRUE
rs141660852	T	C	T	C	0.228649	0.0325	0.029224	0.009775	FALSE	FALSE	FALSE	finn-b-M13_FIBROMYALGIA	18	60032338	0.2715	NA	0.9049	Fibromyalgia	Fibromyalgia	Fibromyalgia || ||	TRUE	igd	NA	NA	NA	NA	NA	NA	NA	GCST90199632	Tartarate levels	18	62365105	0.0493121	3.53868e-06	7099	TRUE	reported	textfile	2	TRUE
rs142959592	T	C	T	C	-0.373738	0.3753	0.0106022	0.01138	FALSE	FALSE	FALSE	finn-b-M13_FIBROMYALGIA	11	76832372	0.248	NA	0.1302	Fibromyalgia	Fibromyalgia	Fibromyalgia || ||	TRUE	igd	NA	NA	NA	NA	NA	NA	NA	GCST90199632	Tartarate levels	11	77121326	0.0817952	4.89608e-06	7099	TRUE	reported	textfile	2	TRUE
rs142997067	G	C	G	C	0.608221	0.4281	0.00388473	0.005334	FALSE	TRUE	FALSE	finn-b-M13_FIBROMYALGIA	17	68339021	0.3656	NA	0.2416	Fibromyalgia	Fibromyalgia	Fibromyalgia || ||	TRUE	igd	NA	NA	NA	NA	NA	NA	NA	GCST90199632	Tartarate levels	17	70342880	0.134166	5.80553e-06	7099	TRUE	reported	textfile	2	TRUE
rs143000803	T	A	T	A	0.368352	0.1155	0.0112878	0.04188	FALSE	TRUE	FALSE	finn-b-M13_FIBROMYALGIA	7	126948038	0.1339	NA	0.3883	Fibromyalgia	Fibromyalgia	Fibromyalgia || ||	TRUE	igd	NA	NA	NA	NA	NA	NA	NA	GCST90199632	Tartarate levels	7	127307984	0.0789907	3.11275e-06	7099	TRUE	reported	textfile	2	TRUE
rs146593632	T	C	T	C	0.370018	-0.0644	0.010688	0.004232	FALSE	FALSE	FALSE	finn-b-M13_FIBROMYALGIA	21	24211649	0.419	NA	0.8778	Fibromyalgia	Fibromyalgia	Fibromyalgia || ||	TRUE	igd	NA	NA	NA	NA	NA	NA	NA	GCST90199632	Tartarate levels	21	22839328	0.0815327	5.67156e-06	7099	TRUE	reported	textfile	2	TRUE
rs17026163	T	C	T	C	-0.223964	0.1948	0.032701	0.02274	FALSE	FALSE	FALSE	finn-b-M13_FIBROMYALGIA	2	102445645	0.1812	NA	0.2824	Fibromyalgia	Fibromyalgia	Fibromyalgia || ||	TRUE	igd	NA	NA	NA	NA	NA	NA	NA	GCST90199632	Tartarate levels	2	101829183	0.0470413	1.92634e-06	7099	TRUE	reported	textfile	2	TRUE
rs298392	T	C	T	C	0.087711	0.0672	0.28972	0.3125	FALSE	FALSE	FALSE	finn-b-M13_FIBROMYALGIA	5	73847897	0.0571	NA	0.2396	Fibromyalgia	Fibromyalgia	Fibromyalgia || ||	TRUE	igd	NA	NA	NA	NA	NA	NA	NA	GCST90199632	Tartarate levels	5	74552072	0.0186612	2.59941e-06	7099	TRUE	reported	textfile	2	TRUE
rs540278823	C	T	C	T	-0.210344	-0.1975	0.0322306	0.01331	FALSE	FALSE	FALSE	finn-b-M13_FIBROMYALGIA	21	28543131	0.2389	NA	0.4084	Fibromyalgia	Fibromyalgia	Fibromyalgia || ||	TRUE	igd	NA	NA	NA	NA	NA	NA	NA	GCST90199632	Tartarate levels	21	27170812	0.047106	7.99472e-06	7099	TRUE	reported	textfile	2	TRUE
rs628038	C	T	C	T	-0.0783007	-0.0078	0.386617	0.3592	FALSE	FALSE	FALSE	finn-b-M13_FIBROMYALGIA	6	74325257	0.055	NA	0.8874	Fibromyalgia	Fibromyalgia	Fibromyalgia || ||	TRUE	igd	NA	NA	NA	NA	NA	NA	NA	GCST90199632	Tartarate levels	6	73615534	0.0170337	4.2902e-06	7099	TRUE	reported	textfile	2	TRUE
rs75583177	G	A	G	A	-0.145169	-0.0062	0.0701345	0.04213	FALSE	FALSE	FALSE	finn-b-M13_FIBROMYALGIA	2	140644704	0.1321	NA	0.9628	Fibromyalgia	Fibromyalgia	Fibromyalgia || ||	TRUE	igd	NA	NA	NA	NA	NA	NA	NA	GCST90199632	Tartarate levels	2	139887135	0.032432	7.60113e-06	7099	TRUE	reported	textfile	2	TRUE
rs76501568	T	C	T	C	-0.267429	-0.1456	0.02066	0.009802	FALSE	FALSE	FALSE	finn-b-M13_FIBROMYALGIA	2	199959803	0.276	NA	0.597901	Fibromyalgia	Fibromyalgia	Fibromyalgia || ||	TRUE	igd	NA	NA	NA	NA	NA	NA	NA	GCST90199632	Tartarate levels	2	199095080	0.0587195	5.2548e-06	7099	TRUE	reported	textfile	2	TRUE
rs77798428	A	G	A	G	-0.318661	0.1707	0.0184793	0.04433	FALSE	FALSE	FALSE	finn-b-M13_FIBROMYALGIA	15	58668401	0.1293	NA	0.1868	Fibromyalgia	Fibromyalgia	Fibromyalgia || ||	TRUE	igd	NA	NA	NA	NA	NA	NA	NA	GCST90199632	Tartarate levels	15	58376202	0.0614021	2.10597e-07	7099	TRUE	reported	textfile	2	TRUE
rs79983252	A	C	A	C	0.236427	0.1289	0.0301043	0.0199	FALSE	FALSE	FALSE	finn-b-M13_FIBROMYALGIA	1	175585513	0.1915	NA	0.5008	Fibromyalgia	Fibromyalgia	Fibromyalgia || ||	TRUE	igd	NA	NA	NA	NA	NA	NA	NA	GCST90199632	Tartarate levels	1	175616377	0.0486249	1.16058e-06	7099	TRUE	reported	textfile	2	TRUE
rs9948951	A	G	A	G	-0.0971868	0.1198	0.184827	0.1772	FALSE	FALSE	FALSE	finn-b-M13_FIBROMYALGIA	18	8592788	0.0694	NA	0.0845396	Fibromyalgia	Fibromyalgia	Fibromyalgia || ||	TRUE	igd	NA	NA	NA	NA	NA	NA	NA	GCST90199632	Tartarate levels	18	8592790	0.0214343	5.78302e-06	7099	TRUE	reported	textfile	2	TRUE
rs1000533	C	T	C	T	-0.0744348	0.0172	0.350884	0.3548	FALSE	FALSE	FALSE	finn-b-M13_FIBROMYALGIA	1	168282491	0.0553	NA	0.756201	Fibromyalgia	Fibromyalgia	Fibromyalgia || ||	TRUE	igd	NA	NA	NA	NA	NA	NA	NA	GCST90201012	3-methyl-2-oxovalerate to 3-methyl-2-oxobutyrate ratio	1	168313253	0.016144	4.01341e-06	8200	TRUE	reported	textfile	2	TRUE
rs111526650	C	G	C	G	0.35998	-0.0774	0.00884521	0.002276	FALSE	TRUE	FALSE	finn-b-M13_FIBROMYALGIA	21	39762535	0.574	NA	0.8927	Fibromyalgia	Fibromyalgia	Fibromyalgia || ||	TRUE	igd	NA	NA	NA	NA	NA	NA	NA	GCST90201012	3-methyl-2-oxovalerate to 3-methyl-2-oxobutyrate ratio	21	38390613	0.0808962	8.59107e-06	8200	TRUE	reported	textfile	2	TRUE
rs111948662	A	G	A	G	-0.229599	0.5039	0.0255551	0.02134	FALSE	FALSE	FALSE	finn-b-M13_FIBROMYALGIA	11	122459660	0.1873	NA	0.00714694	Fibromyalgia	Fibromyalgia	Fibromyalgia || ||	TRUE	igd	NA	NA	NA	NA	NA	NA	NA	GCST90201012	3-methyl-2-oxovalerate to 3-methyl-2-oxobutyrate ratio	11	122588952	0.0481402	1.84786e-06	8200	TRUE	reported	textfile	2	TRUE
rs11612260	G	A	G	A	0.231322	0.3101	0.0235527	0.01608	FALSE	FALSE	FALSE	finn-b-M13_FIBROMYALGIA	12	56806686	0.2186	NA	0.1561	Fibromyalgia	Fibromyalgia	Fibromyalgia || ||	TRUE	igd	NA	NA	NA	NA	NA	NA	NA	GCST90201012	3-methyl-2-oxovalerate to 3-methyl-2-oxobutyrate ratio	12	56412902	0.0502245	4.10972e-06	8200	TRUE	reported	textfile	2	TRUE
rs12584035	G	A	G	A	0.101695	0.0583	0.132434	0.09505	FALSE	FALSE	FALSE	finn-b-M13_FIBROMYALGIA	13	51710956	0.0901	NA	0.517201	Fibromyalgia	Fibromyalgia	Fibromyalgia || ||	TRUE	igd	NA	NA	NA	NA	NA	NA	NA	GCST90201012	3-methyl-2-oxovalerate to 3-methyl-2-oxobutyrate ratio	13	51136820	0.0223658	5.44436e-06	8200	TRUE	reported	textfile	2	TRUE
rs12676561	C	T	C	T	-0.0736734	-0.1005	0.308162	0.2075	FALSE	FALSE	FALSE	finn-b-M13_FIBROMYALGIA	8	134977914	0.0656	NA	0.1257	Fibromyalgia	Fibromyalgia	Fibromyalgia || ||	TRUE	igd	NA	NA	NA	NA	NA	NA	NA	GCST90201012	3-methyl-2-oxovalerate to 3-methyl-2-oxobutyrate ratio	8	133965671	0.0164069	7.1094e-06	8200	TRUE	reported	textfile	2	TRUE
rs140189036	C	T	C	T	0.20402	0.3577	0.0285872	0.005252	FALSE	FALSE	FALSE	finn-b-M13_FIBROMYALGIA	6	166801595	0.3599	NA	0.3204	Fibromyalgia	Fibromyalgia	Fibromyalgia || ||	TRUE	igd	NA	NA	NA	NA	NA	NA	NA	GCST90201012	3-methyl-2-oxovalerate to 3-methyl-2-oxobutyrate ratio	6	166388107	0.0457611	8.25831e-06	8200	TRUE	reported	textfile	2	TRUE
rs140605392	A	G	A	G	-0.403794	-0.043	0.00688045	0.001557	FALSE	FALSE	FALSE	finn-b-M13_FIBROMYALGIA	2	26676467	0.7109	NA	0.9518	Fibromyalgia	Fibromyalgia	Fibromyalgia || ||	TRUE	igd	NA	NA	NA	NA	NA	NA	NA	GCST90201012	3-methyl-2-oxovalerate to 3-methyl-2-oxobutyrate ratio	2	26453599	0.0905641	8.24762e-06	8200	TRUE	reported	textfile	2	TRUE
rs150882021	A	G	A	G	0.161945	-0.0796	0.0473658	0.02039	FALSE	FALSE	FALSE	finn-b-M13_FIBROMYALGIA	5	35107045	0.1862	NA	0.669	Fibromyalgia	Fibromyalgia	Fibromyalgia || ||	TRUE	igd	NA	NA	NA	NA	NA	NA	NA	GCST90201012	3-methyl-2-oxovalerate to 3-methyl-2-oxobutyrate ratio	5	35106943	0.0358207	6.1554e-06	8200	TRUE	reported	textfile	2	TRUE
rs17697795	A	G	A	G	-0.0740641	0.0001	0.326638	0.1866	FALSE	FALSE	FALSE	finn-b-M13_FIBROMYALGIA	16	87159799	0.0684	NA	0.9987	Fibromyalgia	Fibromyalgia	Fibromyalgia || ||	TRUE	igd	NA	NA	NA	NA	NA	NA	NA	GCST90201012	3-methyl-2-oxovalerate to 3-methyl-2-oxobutyrate ratio	16	87126193	0.0164114	6.39252e-06	8200	TRUE	reported	textfile	2	TRUE
rs2164029	G	A	G	A	-0.0763181	-0.0056	0.369143	0.3371	FALSE	FALSE	FALSE	finn-b-M13_FIBROMYALGIA	18	20831009	0.0562	NA	0.9204	Fibromyalgia	Fibromyalgia	Fibromyalgia || ||	TRUE	igd	NA	NA	NA	NA	NA	NA	NA	GCST90201012	3-methyl-2-oxovalerate to 3-methyl-2-oxobutyrate ratio	18	23251045	0.0160576	2.0066e-06	8200	TRUE	reported	textfile	2	TRUE
rs4847350	C	T	C	T	-0.0726322	-0.1184	0.343336	0.3548	FALSE	FALSE	FALSE	finn-b-M13_FIBROMYALGIA	1	95190365	0.0554	NA	0.03249	Fibromyalgia	Fibromyalgia	Fibromyalgia || ||	TRUE	igd	NA	NA	NA	NA	NA	NA	NA	GCST90201012	3-methyl-2-oxovalerate to 3-methyl-2-oxobutyrate ratio	1	94724809	0.0160796	6.27065e-06	8200	TRUE	reported	textfile	2	TRUE
rs55714514	C	T	C	T	-0.0859672	-0.04	0.806544	0.7675	FALSE	FALSE	FALSE	finn-b-M13_FIBROMYALGIA	9	86658762	0.0624	NA	0.5219	Fibromyalgia	Fibromyalgia	Fibromyalgia || ||	TRUE	igd	NA	NA	NA	NA	NA	NA	NA	GCST90201012	3-methyl-2-oxovalerate to 3-methyl-2-oxobutyrate ratio	9	84043847	0.0193239	8.63728e-06	8200	TRUE	reported	textfile	2	TRUE
rs56299996	C	T	C	T	0.114589	-0.1818	0.103744	0.06828	FALSE	FALSE	FALSE	finn-b-M13_FIBROMYALGIA	12	86337109	0.1054	NA	0.0844092	Fibromyalgia	Fibromyalgia	Fibromyalgia || ||	TRUE	igd	NA	NA	NA	NA	NA	NA	NA	GCST90201012	3-methyl-2-oxovalerate to 3-methyl-2-oxobutyrate ratio	12	85943330	0.0247027	3.50579e-06	8200	TRUE	reported	textfile	2	TRUE
rs59647005	T	C	T	C	0.36289	-1.015	0.00933724	0.001107	FALSE	FALSE	FALSE	finn-b-M13_FIBROMYALGIA	14	88441919	0.8228	NA	0.2174	Fibromyalgia	Fibromyalgia	Fibromyalgia || ||	TRUE	igd	NA	NA	NA	NA	NA	NA	NA	GCST90201012	3-methyl-2-oxovalerate to 3-methyl-2-oxobutyrate ratio	14	87975575	0.0790673	4.44033e-06	8200	TRUE	reported	textfile	2	TRUE
rs72695489	C	T	C	T	0.0995737	-0.1102	0.158553	0.1324	FALSE	FALSE	FALSE	finn-b-M13_FIBROMYALGIA	14	82464443	0.079	NA	0.1626	Fibromyalgia	Fibromyalgia	Fibromyalgia || ||	TRUE	igd	NA	NA	NA	NA	NA	NA	NA	GCST90201012	3-methyl-2-oxovalerate to 3-methyl-2-oxobutyrate ratio	14	81998099	0.0210433	2.22497e-06	8200	TRUE	reported	textfile	2	TRUE
rs75003689	T	C	T	C	0.156162	-0.0197	0.0539936	0.06389	FALSE	FALSE	FALSE	finn-b-M13_FIBROMYALGIA	8	2584883	0.1106	NA	0.8588	Fibromyalgia	Fibromyalgia	Fibromyalgia || ||	TRUE	igd	NA	NA	NA	NA	NA	NA	NA	GCST90201012	3-methyl-2-oxovalerate to 3-methyl-2-oxobutyrate ratio	8	2727343	0.0343456	5.44741e-06	8200	TRUE	reported	textfile	2	TRUE
rs76665747	A	G	A	G	-0.166812	0.1016	0.0454212	0.02113	FALSE	FALSE	FALSE	finn-b-M13_FIBROMYALGIA	7	76957153	0.1833	NA	0.579399	Fibromyalgia	Fibromyalgia	Fibromyalgia || ||	TRUE	igd	NA	NA	NA	NA	NA	NA	NA	GCST90201012	3-methyl-2-oxovalerate to 3-methyl-2-oxobutyrate ratio	7	77327836	0.0359952	3.58181e-06	8200	TRUE	reported	textfile	2	TRUE
rs78177403	C	A	C	A	0.321817	0.118	0.0192331	0.02475	FALSE	FALSE	FALSE	finn-b-M13_FIBROMYALGIA	1	108015234	0.1693	NA	0.4859	Fibromyalgia	Fibromyalgia	Fibromyalgia || ||	TRUE	igd	NA	NA	NA	NA	NA	NA	NA	GCST90201012	3-methyl-2-oxovalerate to 3-methyl-2-oxobutyrate ratio	1	107472612	0.0549034	4.58653e-09	8200	TRUE	reported	textfile	2	TRUE
rs79434713	A	C	A	C	-0.151492	-0.2152	0.0538674	0.06407	FALSE	FALSE	FALSE	finn-b-M13_FIBROMYALGIA	19	6700982	0.109	NA	0.0482403	Fibromyalgia	Fibromyalgia	Fibromyalgia || ||	TRUE	igd	NA	NA	NA	NA	NA	NA	NA	GCST90201012	3-methyl-2-oxovalerate to 3-methyl-2-oxobutyrate ratio	19	6700971	0.0340111	8.42111e-06	8200	TRUE	reported	textfile	2	TRUE
rs10005620	A	C	A	C	0.0863954	-0.0648	0.196623	0.253	FALSE	FALSE	FALSE	finn-b-M13_FIBROMYALGIA	4	53622471	0.0611	NA	0.2885	Fibromyalgia	Fibromyalgia	Fibromyalgia || ||	TRUE	igd	NA	NA	NA	NA	NA	NA	NA	GCST90200586	X-21471 levels	4	52756304	0.019471	9.11692e-06	7982	TRUE	reported	textfile	2	TRUE
rs1057868	T	C	T	C	0.081922	-0.0292	0.283896	0.3942	FALSE	FALSE	FALSE	finn-b-M13_FIBROMYALGIA	7	75615006	0.0541	NA	0.589	Fibromyalgia	Fibromyalgia	Fibromyalgia || ||	TRUE	igd	NA	NA	NA	NA	NA	NA	NA	GCST90200586	X-21471 levels	7	75985688	0.0171193	1.70673e-06	7982	TRUE	reported	textfile	2	TRUE
rs113425901	T	C	T	C	-0.319025	1.1418	0.0119979	0.002779	FALSE	FALSE	FALSE	finn-b-M13_FIBROMYALGIA	6	16851639	0.5516	NA	0.0384503	Fibromyalgia	Fibromyalgia	Fibromyalgia || ||	TRUE	igd	NA	NA	NA	NA	NA	NA	NA	GCST90200586	X-21471 levels	6	16851408	0.0718024	8.8671e-06	7982	TRUE	reported	textfile	2	TRUE
rs113812196	A	G	A	G	-0.25625	0.208	0.0198971	0.02479	FALSE	FALSE	FALSE	finn-b-M13_FIBROMYALGIA	5	96032889	0.1694	NA	0.2195	Fibromyalgia	Fibromyalgia	Fibromyalgia || ||	TRUE	igd	NA	NA	NA	NA	NA	NA	NA	GCST90200586	X-21471 levels	5	96697185	0.0555345	3.94532e-06	7982	TRUE	reported	textfile	2	TRUE
rs114114736	T	C	T	C	-0.221632	-0.0155	0.0248338	0.01135	FALSE	FALSE	FALSE	finn-b-M13_FIBROMYALGIA	1	21037956	0.2638	NA	0.9531	Fibromyalgia	Fibromyalgia	Fibromyalgia || ||	TRUE	igd	NA	NA	NA	NA	NA	NA	NA	GCST90200586	X-21471 levels	1	20711463	0.0494928	7.53248e-06	7982	TRUE	reported	textfile	2	TRUE
rs116576599	T	C	T	C	0.151742	-0.0338	0.058263	0.05066	FALSE	FALSE	FALSE	finn-b-M13_FIBROMYALGIA	16	80870655	0.1229	NA	0.7831	Fibromyalgia	Fibromyalgia	Fibromyalgia || ||	TRUE	igd	NA	NA	NA	NA	NA	NA	NA	GCST90200586	X-21471 levels	16	80836758	0.0332013	4.86864e-06	7982	TRUE	reported	textfile	2	TRUE
rs117222455	C	T	C	T	-0.237521	0.1757	0.022232	0.0147	FALSE	FALSE	FALSE	finn-b-M13_FIBROMYALGIA	7	19303920	0.2183	NA	0.4207	Fibromyalgia	Fibromyalgia	Fibromyalgia || ||	TRUE	igd	NA	NA	NA	NA	NA	NA	NA	GCST90200586	X-21471 levels	7	19264297	0.0526376	6.41025e-06	7982	TRUE	reported	textfile	2	TRUE
rs117988718	A	G	A	G	0.233337	-0.0059	0.0227933	0.02867	FALSE	FALSE	FALSE	finn-b-M13_FIBROMYALGIA	7	49251249	0.1621	NA	0.971	Fibromyalgia	Fibromyalgia	Fibromyalgia || ||	TRUE	igd	NA	NA	NA	NA	NA	NA	NA	GCST90200586	X-21471 levels	7	49211653	0.0520922	7.48857e-06	7982	TRUE	reported	textfile	2	TRUE
rs1260333	G	A	G	A	-0.0833185	-0.0335	0.541269	0.605	FALSE	FALSE	FALSE	finn-b-M13_FIBROMYALGIA	2	27750545	0.0542	NA	0.536	Fibromyalgia	Fibromyalgia	Fibromyalgia || ||	TRUE	igd	TRUE	rs1260333	rs2950835	A	G	A	G	GCST90200586	X-21471 levels	2	27525757	0.0155065	7.73736e-08	7982	TRUE	reported	textfile	2	TRUE
rs146939592	G	A	G	A	0.328913	-0.0327	0.0136278	0.01621	FALSE	FALSE	FALSE	finn-b-M13_FIBROMYALGIA	4	39823518	0.2153	NA	0.8793	Fibromyalgia	Fibromyalgia	Fibromyalgia || ||	TRUE	igd	NA	NA	NA	NA	NA	NA	NA	GCST90200586	X-21471 levels	4	39821898	0.0666354	7.97394e-07	7982	TRUE	reported	textfile	2	TRUE
rs148544135	G	A	G	A	0.333838	-0.0764	0.010363	0.0508	FALSE	FALSE	FALSE	finn-b-M13_FIBROMYALGIA	14	77428125	0.1214	NA	0.529	Fibromyalgia	Fibromyalgia	Fibromyalgia || ||	TRUE	igd	NA	NA	NA	NA	NA	NA	NA	GCST90200586	X-21471 levels	14	76961782	0.0753431	9.38383e-06	7982	TRUE	reported	textfile	2	TRUE
rs212100	C	T	C	T	0.331612	0.0102	0.841223	0.8491	FALSE	FALSE	FALSE	finn-b-M13_FIBROMYALGIA	19	48376995	0.0737	NA	0.8896	Fibromyalgia	Fibromyalgia	Fibromyalgia || ||	TRUE	igd	NA	NA	NA	NA	NA	NA	NA	GCST90200586	X-21471 levels	19	47873738	0.0210966	1.12539e-55	7982	TRUE	reported	textfile	2	TRUE
rs2178720	T	C	T	C	-0.084673	-0.0648	0.249968	0.2975	FALSE	FALSE	FALSE	finn-b-M13_FIBROMYALGIA	16	7269847	0.0579	NA	0.2626	Fibromyalgia	Fibromyalgia	Fibromyalgia || ||	TRUE	igd	NA	NA	NA	NA	NA	NA	NA	GCST90200586	X-21471 levels	16	7219846	0.0179583	2.4174e-06	7982	TRUE	reported	textfile	2	TRUE
rs2900478	A	T	A	T	0.351432	-0.0402	0.168675	0.22	FALSE	TRUE	FALSE	finn-b-M13_FIBROMYALGIA	12	21368797	0.0641	NA	0.5303	Fibromyalgia	Fibromyalgia	Fibromyalgia || ||	TRUE	igd	NA	NA	NA	NA	NA	NA	NA	GCST90200586	X-21471 levels	12	21215863	0.0201586	4.60307e-68	7982	TRUE	reported	textfile	2	TRUE
rs34371091	T	G	T	G	0.126752	-0.0517	0.0858444	0.1094	FALSE	FALSE	FALSE	finn-b-M13_FIBROMYALGIA	14	21294602	0.0874	NA	0.5541	Fibromyalgia	Fibromyalgia	Fibromyalgia || ||	TRUE	igd	NA	NA	NA	NA	NA	NA	NA	GCST90200586	X-21471 levels	14	20826443	0.0286136	9.43284e-06	7982	TRUE	reported	textfile	2	TRUE
rs35249383	A	T	A	T	-0.270569	-0.7412	0.0189651	0.004924	FALSE	TRUE	FALSE	finn-b-M13_FIBROMYALGIA	9	131361028	0.3955	NA	0.0609397	Fibromyalgia	Fibromyalgia	Fibromyalgia || ||	TRUE	igd	NA	NA	NA	NA	NA	NA	NA	GCST90200586	X-21471 levels	9	128598749	0.0568194	1.91773e-06	7982	TRUE	reported	textfile	2	TRUE
rs3789505	T	C	T	C	0.171932	0.0948	0.0442048	0.04893	FALSE	FALSE	FALSE	finn-b-M13_FIBROMYALGIA	1	6342345	0.1216	NA	0.4357	Fibromyalgia	Fibromyalgia	Fibromyalgia || ||	TRUE	igd	NA	NA	NA	NA	NA	NA	NA	GCST90200586	X-21471 levels	1	6282285	0.0375928	4.79544e-06	7982	TRUE	reported	textfile	2	TRUE
rs4762697	T	A	T	A	0.169972	0.016	0.716039	0.6496	FALSE	TRUE	FALSE	finn-b-M13_FIBROMYALGIA	12	21315415	0.0555	NA	0.772999	Fibromyalgia	Fibromyalgia	Fibromyalgia || ||	TRUE	igd	TRUE	rs4762697	rs4149026	A	T	C	A	GCST90200586	X-21471 levels	12	21162039	0.017203	5.0648e-23	7982	TRUE	reported	textfile	2	TRUE
rs59683852	A	G	A	G	-0.610797	-0.1769	0.00470278	0.03196	FALSE	FALSE	FALSE	finn-b-M13_FIBROMYALGIA	7	91746400	0.1497	NA	0.2373	Fibromyalgia	Fibromyalgia	Fibromyalgia || ||	TRUE	igd	NA	NA	NA	NA	NA	NA	NA	GCST90200586	X-21471 levels	7	92117086	0.113088	6.62472e-08	7982	TRUE	reported	textfile	2	TRUE
rs61780033	A	G	A	G	-0.248312	-0.5861	0.0199746	0.004893	FALSE	FALSE	FALSE	finn-b-M13_FIBROMYALGIA	1	39311155	0.3917	NA	0.1345	Fibromyalgia	Fibromyalgia	Fibromyalgia || ||	TRUE	igd	NA	NA	NA	NA	NA	NA	NA	GCST90200586	X-21471 levels	1	38845483	0.0556231	8.03771e-06	7982	TRUE	reported	textfile	2	TRUE
rs6876434	C	T	C	T	0.0889546	-0.1233	0.704043	0.6983	FALSE	FALSE	FALSE	finn-b-M13_FIBROMYALGIA	5	54317840	0.0578	NA	0.0329102	Fibromyalgia	Fibromyalgia	Fibromyalgia || ||	TRUE	igd	NA	NA	NA	NA	NA	NA	NA	GCST90200586	X-21471 levels	5	55022012	0.0174087	3.22557e-07	7982	TRUE	reported	textfile	2	TRUE
rs72838129	C	T	C	T	-0.580097	-0.2341	0.0572486	0.02504	FALSE	FALSE	FALSE	finn-b-M13_FIBROMYALGIA	10	101604481	0.1703	NA	0.1693	Fibromyalgia	Fibromyalgia	Fibromyalgia || ||	TRUE	igd	NA	NA	NA	NA	NA	NA	NA	GCST90200586	X-21471 levels	10	99844724	0.0327696	4.0247e-70	7982	TRUE	reported	textfile	2	TRUE
rs75369470	T	C	T	C	0.230255	0.064	0.0240918	0.008285	FALSE	FALSE	FALSE	finn-b-M13_FIBROMYALGIA	16	10197951	0.2916	NA	0.8262	Fibromyalgia	Fibromyalgia	Fibromyalgia || ||	TRUE	igd	NA	NA	NA	NA	NA	NA	NA	GCST90200586	X-21471 levels	16	10104094	0.0503223	4.74838e-06	7982	TRUE	reported	textfile	2	TRUE
rs77100631	G	A	G	A	-0.161227	0.1516	0.0574074	0.1021	FALSE	FALSE	FALSE	finn-b-M13_FIBROMYALGIA	17	76034570	0.0887	NA	0.0874299	Fibromyalgia	Fibromyalgia	Fibromyalgia || ||	TRUE	igd	TRUE	rs77100631	rs62078555	G	A	T	C	GCST90200586	X-21471 levels	17	78006774	0.0337304	1.75407e-06	7982	TRUE	reported	textfile	2	TRUE
rs7713886	T	C	T	C	-0.0945293	-0.0436	0.801235	0.7996	FALSE	FALSE	FALSE	finn-b-M13_FIBROMYALGIA	5	148025158	0.0665	NA	0.5118	Fibromyalgia	Fibromyalgia	Fibromyalgia || ||	TRUE	igd	NA	NA	NA	NA	NA	NA	NA	GCST90200586	X-21471 levels	5	148645595	0.0200122	2.31723e-06	7982	TRUE	reported	textfile	2	TRUE
rs841217	C	T	C	T	-0.0767432	0.0051	0.534665	0.5501	FALSE	FALSE	FALSE	finn-b-M13_FIBROMYALGIA	16	4746392	0.0532	NA	0.9235	Fibromyalgia	Fibromyalgia	Fibromyalgia || ||	TRUE	igd	NA	NA	NA	NA	NA	NA	NA	GCST90200586	X-21471 levels	16	4696391	0.0157658	1.12908e-06	7982	TRUE	reported	textfile	2	TRUE
rs10005957	T	C	T	C	-0.184216	-0.2367	0.0416212	0.02311	FALSE	FALSE	FALSE	finn-b-M13_FIBROMYALGIA	4	114258996	0.1779	NA	0.1833	Fibromyalgia	Fibromyalgia	Fibromyalgia || ||	TRUE	igd	NA	NA	NA	NA	NA	NA	NA	GCST90200243	Hydroxypalmitoyl sphingomyelin (d18:1/16:0(OH)) levels	4	113337840	0.0378129	1.10597e-06	8260	TRUE	reported	textfile	2	TRUE
rs113583332	A	G	A	G	0.193077	0.1808	0.0355654	0.02057	FALSE	FALSE	FALSE	finn-b-M13_FIBROMYALGIA	11	92855082	0.1913	NA	0.3446	Fibromyalgia	Fibromyalgia	Fibromyalgia || ||	TRUE	igd	NA	NA	NA	NA	NA	NA	NA	GCST90200243	Hydroxypalmitoyl sphingomyelin (d18:1/16:0(OH)) levels	11	93121916	0.0408548	2.29073e-06	8260	TRUE	reported	textfile	2	TRUE
rs114372900	T	G	T	G	-0.321109	0.0561	0.0142454	0.0096	FALSE	FALSE	FALSE	finn-b-M13_FIBROMYALGIA	4	72489719	0.2876	NA	0.8452	Fibromyalgia	Fibromyalgia	Fibromyalgia || ||	TRUE	igd	NA	NA	NA	NA	NA	NA	NA	GCST90200243	Hydroxypalmitoyl sphingomyelin (d18:1/16:0(OH)) levels	4	71624002	0.0639159	5.06252e-07	8260	TRUE	reported	textfile	2	TRUE
rs116557385	T	A	T	A	0.184715	-0.0767	0.0394314	0.04626	FALSE	TRUE	FALSE	finn-b-M13_FIBROMYALGIA	1	98938120	0.1286	NA	0.5507	Fibromyalgia	Fibromyalgia	Fibromyalgia || ||	TRUE	igd	NA	NA	NA	NA	NA	NA	NA	GCST90200243	Hydroxypalmitoyl sphingomyelin (d18:1/16:0(OH)) levels	1	98472564	0.0388494	1.98786e-06	8260	TRUE	reported	textfile	2	TRUE
rs12338432	C	T	C	T	-0.276198	0.0634	0.0147291	0.007224	FALSE	FALSE	FALSE	finn-b-M13_FIBROMYALGIA	9	23133105	0.3058	NA	0.8357	Fibromyalgia	Fibromyalgia	Fibromyalgia || ||	TRUE	igd	NA	NA	NA	NA	NA	NA	NA	GCST90200243	Hydroxypalmitoyl sphingomyelin (d18:1/16:0(OH)) levels	9	23133106	0.0625174	9.96423e-06	8260	TRUE	reported	textfile	2	TRUE
rs1260326	C	T	C	T	0.0849292	-0.0478	0.587611	0.6491	FALSE	FALSE	FALSE	finn-b-M13_FIBROMYALGIA	2	27730940	0.0555	NA	0.3891	Fibromyalgia	Fibromyalgia	Fibromyalgia || ||	TRUE	igd	NA	NA	NA	NA	NA	NA	NA	GCST90200243	Hydroxypalmitoyl sphingomyelin (d18:1/16:0(OH)) levels	2	27508073	0.0153285	3.01404e-08	8260	TRUE	reported	textfile	2	TRUE
rs138106374	A	G	A	G	0.220026	0.2783	0.026616	0.04618	FALSE	FALSE	FALSE	finn-b-M13_FIBROMYALGIA	16	8104547	0.1258	NA	0.0269098	Fibromyalgia	Fibromyalgia	Fibromyalgia || ||	TRUE	igd	NA	NA	NA	NA	NA	NA	NA	GCST90200243	Hydroxypalmitoyl sphingomyelin (d18:1/16:0(OH)) levels	16	8054545	0.0468771	2.68346e-06	8260	TRUE	reported	textfile	2	TRUE
rs1461729	G	A	G	A	0.110054	-0.0292	0.89731	0.8444	FALSE	FALSE	FALSE	finn-b-M13_FIBROMYALGIA	8	9187242	0.0765	NA	0.7022	Fibromyalgia	Fibromyalgia	Fibromyalgia || ||	TRUE	igd	NA	NA	NA	NA	NA	NA	NA	GCST90200243	Hydroxypalmitoyl sphingomyelin (d18:1/16:0(OH)) levels	8	9329732	0.0248065	9.143e-06	8260	TRUE	reported	textfile	2	TRUE
rs17159433	G	A	G	A	0.259131	-0.0892	0.0176035	0.02745	FALSE	FALSE	FALSE	finn-b-M13_FIBROMYALGIA	7	84522476	0.1655	NA	0.5897	Fibromyalgia	Fibromyalgia	Fibromyalgia || ||	TRUE	igd	NA	NA	NA	NA	NA	NA	NA	GCST90200243	Hydroxypalmitoyl sphingomyelin (d18:1/16:0(OH)) levels	7	84893160	0.0574328	6.42494e-06	8260	TRUE	reported	textfile	2	TRUE
rs174568	T	C	T	C	0.281473	0.0023	0.338794	0.412	FALSE	FALSE	FALSE	finn-b-M13_FIBROMYALGIA	11	61593816	0.054	NA	0.9656	Fibromyalgia	Fibromyalgia	Fibromyalgia || ||	TRUE	igd	NA	NA	NA	NA	NA	NA	NA	GCST90200243	Hydroxypalmitoyl sphingomyelin (d18:1/16:0(OH)) levels	11	61826344	0.0156069	1.03188e-72	8260	TRUE	reported	textfile	2	TRUE
rs2117347	C	T	C	T	0.0697622	-0.0906	0.489268	0.584	FALSE	FALSE	FALSE	finn-b-M13_FIBROMYALGIA	7	1557967	0.0538	NA	0.0921892	Fibromyalgia	Fibromyalgia	Fibromyalgia || ||	TRUE	igd	NA	NA	NA	NA	NA	NA	NA	GCST90200243	Hydroxypalmitoyl sphingomyelin (d18:1/16:0(OH)) levels	7	1518331	0.0150425	3.5234e-06	8260	TRUE	reported	textfile	2	TRUE
rs2240466	A	G	A	G	0.11771	0.0378	0.119411	0.1254	FALSE	FALSE	FALSE	finn-b-M13_FIBROMYALGIA	7	72856269	0.08	NA	0.636499	Fibromyalgia	Fibromyalgia	Fibromyalgia || ||	TRUE	igd	NA	NA	NA	NA	NA	NA	NA	GCST90200243	Hydroxypalmitoyl sphingomyelin (d18:1/16:0(OH)) levels	7	73441939	0.0230896	3.43328e-07	8260	TRUE	reported	textfile	2	TRUE
rs2315065	A	C	A	C	0.129803	0.0138	0.0876365	0.06276	FALSE	FALSE	FALSE	finn-b-M13_FIBROMYALGIA	6	161108144	0.1103	NA	0.9003	Fibromyalgia	Fibromyalgia	Fibromyalgia || ||	TRUE	igd	NA	NA	NA	NA	NA	NA	NA	GCST90200243	Hydroxypalmitoyl sphingomyelin (d18:1/16:0(OH)) levels	6	160687112	0.0268117	1.28997e-06	8260	TRUE	reported	textfile	2	TRUE
rs28795074	A	G	A	G	-0.167131	0.0102	0.075	0.07052	FALSE	FALSE	FALSE	finn-b-M13_FIBROMYALGIA	19	45436657	0.1051	NA	0.9226	Fibromyalgia	Fibromyalgia	Fibromyalgia || ||	TRUE	igd	NA	NA	NA	NA	NA	NA	NA	GCST90200243	Hydroxypalmitoyl sphingomyelin (d18:1/16:0(OH)) levels	19	44933400	0.0298664	2.19404e-08	8260	TRUE	reported	textfile	2	TRUE
rs3736228	T	C	T	C	-0.111867	0.0653	0.145273	0.0507	FALSE	FALSE	FALSE	finn-b-M13_FIBROMYALGIA	11	68201295	0.1218	NA	0.5919	Fibromyalgia	Fibromyalgia	Fibromyalgia || ||	TRUE	igd	NA	NA	NA	NA	NA	NA	NA	GCST90200243	Hydroxypalmitoyl sphingomyelin (d18:1/16:0(OH)) levels	11	68433827	0.0213966	1.71121e-07	8260	TRUE	reported	textfile	2	TRUE
rs3756963	C	T	C	T	-0.0846737	0.0916	0.247179	0.1337	FALSE	FALSE	FALSE	finn-b-M13_FIBROMYALGIA	6	11022154	0.0784	NA	0.2426	Fibromyalgia	Fibromyalgia	Fibromyalgia || ||	TRUE	igd	NA	NA	NA	NA	NA	NA	NA	GCST90200243	Hydroxypalmitoyl sphingomyelin (d18:1/16:0(OH)) levels	6	11021921	0.017413	1.1582e-06	8260	TRUE	reported	textfile	2	TRUE
rs375938	A	G	A	G	0.0686571	0.0597	0.403623	0.3854	FALSE	FALSE	FALSE	finn-b-M13_FIBROMYALGIA	17	15245157	0.0544	NA	0.2724	Fibromyalgia	Fibromyalgia	Fibromyalgia || ||	TRUE	igd	NA	NA	NA	NA	NA	NA	NA	GCST90200243	Hydroxypalmitoyl sphingomyelin (d18:1/16:0(OH)) levels	17	15341840	0.0153336	7.55037e-06	8260	TRUE	reported	textfile	2	TRUE
rs4742750	A	G	A	G	0.111966	0.1112	0.143065	0.1727	FALSE	FALSE	FALSE	finn-b-M13_FIBROMYALGIA	9	101725919	0.0703	NA	0.114	Fibromyalgia	Fibromyalgia	Fibromyalgia || ||	TRUE	igd	NA	NA	NA	NA	NA	NA	NA	GCST90200243	Hydroxypalmitoyl sphingomyelin (d18:1/16:0(OH)) levels	9	98963637	0.0214244	1.73139e-07	8260	TRUE	reported	textfile	2	TRUE
rs482282	A	G	A	G	0.0680071	0.0178	0.506247	0.559	FALSE	FALSE	FALSE	finn-b-M13_FIBROMYALGIA	18	51765409	0.0538	NA	0.740901	Fibromyalgia	Fibromyalgia	Fibromyalgia || ||	TRUE	igd	NA	NA	NA	NA	NA	NA	NA	GCST90200243	Hydroxypalmitoyl sphingomyelin (d18:1/16:0(OH)) levels	18	54239039	0.0151632	7.29085e-06	8260	TRUE	reported	textfile	2	TRUE
rs55698751	G	A	G	A	0.340571	-0.1905	0.00986001	0.002834	FALSE	FALSE	FALSE	finn-b-M13_FIBROMYALGIA	1	64442551	0.5261	NA	0.7172	Fibromyalgia	Fibromyalgia	Fibromyalgia || ||	TRUE	igd	NA	NA	NA	NA	NA	NA	NA	GCST90200243	Hydroxypalmitoyl sphingomyelin (d18:1/16:0(OH)) levels	1	63976879	0.0755595	6.56501e-06	8260	TRUE	reported	textfile	2	TRUE
rs56052006	A	G	A	G	0.26461	-0.4128	0.0165796	0.0117	FALSE	FALSE	FALSE	finn-b-M13_FIBROMYALGIA	8	125573647	0.2492	NA	0.0976	Fibromyalgia	Fibromyalgia	Fibromyalgia || ||	TRUE	igd	NA	NA	NA	NA	NA	NA	NA	GCST90200243	Hydroxypalmitoyl sphingomyelin (d18:1/16:0(OH)) levels	8	124561406	0.0588982	7.03374e-06	8260	TRUE	reported	textfile	2	TRUE
rs59771628	C	A	C	A	0.0717336	-0.0548	0.466226	0.4639	FALSE	FALSE	FALSE	finn-b-M13_FIBROMYALGIA	3	100219086	0.053	NA	0.3013	Fibromyalgia	Fibromyalgia	Fibromyalgia || ||	TRUE	igd	NA	NA	NA	NA	NA	NA	NA	GCST90200243	Hydroxypalmitoyl sphingomyelin (d18:1/16:0(OH)) levels	3	100500242	0.0150877	1.99012e-06	8260	TRUE	reported	textfile	2	TRUE
rs639709	C	G	C	G	0.0742336	-0.0085	0.287074	0.2279	FALSE	TRUE	FALSE	finn-b-M13_FIBROMYALGIA	5	103311439	0.0631	NA	0.8924	Fibromyalgia	Fibromyalgia	Fibromyalgia || ||	TRUE	igd	NA	NA	NA	NA	NA	NA	NA	GCST90200243	Hydroxypalmitoyl sphingomyelin (d18:1/16:0(OH)) levels	5	103975738	0.0167215	9.02066e-06	8260	TRUE	reported	textfile	2	TRUE
rs6471322	A	G	A	G	-0.0810044	0.082	0.635432	0.6742	FALSE	FALSE	FALSE	finn-b-M13_FIBROMYALGIA	8	93162375	0.0563	NA	0.1452	Fibromyalgia	Fibromyalgia	Fibromyalgia || ||	TRUE	igd	NA	NA	NA	NA	NA	NA	NA	GCST90200243	Hydroxypalmitoyl sphingomyelin (d18:1/16:0(OH)) levels	8	92150147	0.015584	2.01536e-07	8260	TRUE	reported	textfile	2	TRUE
rs6937870	T	C	T	C	0.0783475	-0.0165	0.263694	0.3465	FALSE	FALSE	FALSE	finn-b-M13_FIBROMYALGIA	6	107927883	0.0557	NA	0.766999	Fibromyalgia	Fibromyalgia	Fibromyalgia || ||	TRUE	igd	NA	NA	NA	NA	NA	NA	NA	GCST90200243	Hydroxypalmitoyl sphingomyelin (d18:1/16:0(OH)) levels	6	107606679	0.0169493	3.79224e-06	8260	TRUE	reported	textfile	2	TRUE
rs72940873	G	T	G	T	0.137825	0.1031	0.0702053	0.06895	FALSE	FALSE	FALSE	finn-b-M13_FIBROMYALGIA	11	20416589	0.1051	NA	0.3264	Fibromyalgia	Fibromyalgia	Fibromyalgia || ||	TRUE	igd	NA	NA	NA	NA	NA	NA	NA	GCST90200243	Hydroxypalmitoyl sphingomyelin (d18:1/16:0(OH)) levels	11	20395043	0.02942	2.8033e-06	8260	TRUE	reported	textfile	2	TRUE
rs73177473	T	A	T	A	-0.138356	-0.0777	0.0644493	0.08651	FALSE	TRUE	FALSE	finn-b-M13_FIBROMYALGIA	2	11814010	0.0955	NA	0.4154	Fibromyalgia	Fibromyalgia	Fibromyalgia || ||	TRUE	igd	NA	NA	NA	NA	NA	NA	NA	GCST90200243	Hydroxypalmitoyl sphingomyelin (d18:1/16:0(OH)) levels	2	11673884	0.0305542	5.94815e-06	8260	TRUE	reported	textfile	2	TRUE
rs74473137	A	G	A	G	-0.249778	-0.2106	0.0199708	0.01332	FALSE	FALSE	FALSE	finn-b-M13_FIBROMYALGIA	6	82287176	0.2333	NA	0.3666	Fibromyalgia	Fibromyalgia	Fibromyalgia || ||	TRUE	igd	NA	NA	NA	NA	NA	NA	NA	GCST90200243	Hydroxypalmitoyl sphingomyelin (d18:1/16:0(OH)) levels	6	81577459	0.0536481	3.22636e-06	8260	TRUE	reported	textfile	2	TRUE
rs79209503	T	C	T	C	-0.221151	-0.2953	0.0246051	0.0263	FALSE	FALSE	FALSE	finn-b-M13_FIBROMYALGIA	7	25967928	0.1652	NA	0.0738108	Fibromyalgia	Fibromyalgia	Fibromyalgia || ||	TRUE	igd	NA	NA	NA	NA	NA	NA	NA	GCST90200243	Hydroxypalmitoyl sphingomyelin (d18:1/16:0(OH)) levels	7	25928308	0.0485036	5.12829e-06	8260	TRUE	reported	textfile	2	TRUE
rs80321804	G	A	G	A	-0.177044	0.0303	0.037356	0.0386	FALSE	FALSE	FALSE	finn-b-M13_FIBROMYALGIA	1	35224842	0.1368	NA	0.825	Fibromyalgia	Fibromyalgia	Fibromyalgia || ||	TRUE	igd	NA	NA	NA	NA	NA	NA	NA	GCST90200243	Hydroxypalmitoyl sphingomyelin (d18:1/16:0(OH)) levels	1	34759241	0.0393603	6.85855e-06	8260	TRUE	reported	textfile	2	TRUE
rs964184	C	G	C	G	0.109903	-0.1669	0.869246	0.8542	FALSE	TRUE	FALSE	finn-b-M13_FIBROMYALGIA	11	116648917	0.0752	NA	0.0264899	Fibromyalgia	Fibromyalgia	Fibromyalgia || ||	TRUE	igd	NA	NA	NA	NA	NA	NA	NA	GCST90200243	Hydroxypalmitoyl sphingomyelin (d18:1/16:0(OH)) levels	11	116778201	0.0222776	8.08271e-07	8260	TRUE	reported	textfile	2	TRUE
rs10006032	G	A	G	A	-0.15194	-0.121	0.0573319	0.03517	FALSE	FALSE	FALSE	finn-b-M13_FIBROMYALGIA	4	160840985	0.1448	NA	0.4033	Fibromyalgia	Fibromyalgia	Fibromyalgia || ||	TRUE	igd	NA	NA	NA	NA	NA	NA	NA	GCST90199684	1-linoleoylglycerol (18:2) levels	4	159919833	0.0334117	5.42817e-06	8212	TRUE	reported	textfile	2	TRUE
rs10072491	T	C	T	C	-0.17568	-0.0567	0.0420795	0.04086	FALSE	FALSE	FALSE	finn-b-M13_FIBROMYALGIA	5	4715497	0.135	NA	0.674599	Fibromyalgia	Fibromyalgia	Fibromyalgia || ||	TRUE	igd	NA	NA	NA	NA	NA	NA	NA	GCST90199684	1-linoleoylglycerol (18:2) levels	5	4715384	0.038446	4.88843e-06	8212	TRUE	reported	textfile	2	TRUE
rs10735636	G	C	G	C	0.266346	0.1183	0.981772	0.9708	FALSE	TRUE	FALSE	finn-b-M13_FIBROMYALGIA	9	77492077	0.1582	NA	0.4547	Fibromyalgia	Fibromyalgia	Fibromyalgia || ||	TRUE	igd	NA	NA	NA	NA	NA	NA	NA	GCST90199684	1-linoleoylglycerol (18:2) levels	9	74877161	0.0602083	9.7007e-06	8212	TRUE	reported	textfile	2	TRUE
rs11033752	T	C	T	C	-0.0907355	0.0176	0.17797	0.1626	FALSE	FALSE	FALSE	finn-b-M13_FIBROMYALGIA	11	36729709	0.0718	NA	0.8063	Fibromyalgia	Fibromyalgia	Fibromyalgia || ||	TRUE	igd	NA	NA	NA	NA	NA	NA	NA	GCST90199684	1-linoleoylglycerol (18:2) levels	11	36708159	0.0204967	9.56226e-06	8212	TRUE	reported	textfile	2	TRUE
rs11160050	G	A	G	A	0.125943	0.0108	0.0875843	0.12	FALSE	FALSE	FALSE	finn-b-M13_FIBROMYALGIA	14	92653475	0.0839	NA	0.8977	Fibromyalgia	Fibromyalgia	Fibromyalgia || ||	TRUE	igd	NA	NA	NA	NA	NA	NA	NA	GCST90199684	1-linoleoylglycerol (18:2) levels	14	92187131	0.028029	7.01221e-06	8212	TRUE	reported	textfile	2	TRUE
rs113627835	C	G	C	G	0.382342	-0.4741	0.00861964	0.009635	FALSE	TRUE	FALSE	finn-b-M13_FIBROMYALGIA	2	225928419	0.2797	NA	0.09007	Fibromyalgia	Fibromyalgia	Fibromyalgia || ||	TRUE	igd	NA	NA	NA	NA	NA	NA	NA	GCST90199684	1-linoleoylglycerol (18:2) levels	2	225063702	0.0840396	5.37605e-06	8212	TRUE	reported	textfile	2	TRUE
rs114473062	T	C	T	C	0.226158	0.1704	0.025608	0.007681	FALSE	FALSE	FALSE	finn-b-M13_FIBROMYALGIA	4	32421085	0.3106	NA	0.5833	Fibromyalgia	Fibromyalgia	Fibromyalgia || ||	TRUE	igd	NA	NA	NA	NA	NA	NA	NA	GCST90199684	1-linoleoylglycerol (18:2) levels	4	32419463	0.049117	4.135e-06	8212	TRUE	reported	textfile	2	TRUE
rs117168942	C	T	C	T	0.191261	0.2033	0.0332722	0.00608	FALSE	FALSE	FALSE	finn-b-M13_FIBROMYALGIA	10	21990316	0.3607	NA	0.5729	Fibromyalgia	Fibromyalgia	Fibromyalgia || ||	TRUE	igd	NA	NA	NA	NA	NA	NA	NA	GCST90199684	1-linoleoylglycerol (18:2) levels	10	21701387	0.0431454	9.29617e-06	8212	TRUE	reported	textfile	2	TRUE
rs12447287	C	T	C	T	0.081903	-0.1615	0.245284	0.3078	FALSE	FALSE	FALSE	finn-b-M13_FIBROMYALGIA	16	56937998	0.0573	NA	0.00483905	Fibromyalgia	Fibromyalgia	Fibromyalgia || ||	TRUE	igd	NA	NA	NA	NA	NA	NA	NA	GCST90199684	1-linoleoylglycerol (18:2) levels	16	56904086	0.0180828	5.91739e-06	8212	TRUE	reported	textfile	2	TRUE
rs12858688	T	C	T	C	-0.22125	-0.0374	0.0249358	0.008381	FALSE	FALSE	FALSE	finn-b-M13_FIBROMYALGIA	13	70356464	0.2928	NA	0.8982	Fibromyalgia	Fibromyalgia	Fibromyalgia || ||	TRUE	igd	NA	NA	NA	NA	NA	NA	NA	GCST90199684	1-linoleoylglycerol (18:2) levels	13	69782332	0.0491192	6.65784e-06	8212	TRUE	reported	textfile	2	TRUE
rs17410962	A	G	A	G	-0.11411	-0.0309	0.120383	0.09446	FALSE	FALSE	FALSE	finn-b-M13_FIBROMYALGIA	8	19848080	0.0907	NA	0.7331	Fibromyalgia	Fibromyalgia	Fibromyalgia || ||	TRUE	igd	NA	NA	NA	NA	NA	NA	NA	GCST90199684	1-linoleoylglycerol (18:2) levels	8	19990569	0.0235805	1.30378e-06	8212	TRUE	reported	textfile	2	TRUE
rs2943179	T	C	T	C	-0.0822174	-0.2186	0.221974	0.1431	FALSE	FALSE	FALSE	finn-b-M13_FIBROMYALGIA	8	88125316	0.0771	NA	0.00457899	Fibromyalgia	Fibromyalgia	Fibromyalgia || ||	TRUE	igd	NA	NA	NA	NA	NA	NA	NA	GCST90199684	1-linoleoylglycerol (18:2) levels	8	87113088	0.0185161	8.98228e-06	8212	TRUE	reported	textfile	2	TRUE
rs56354314	A	G	A	G	0.235446	0.2254	0.022346	0.02734	FALSE	FALSE	FALSE	finn-b-M13_FIBROMYALGIA	12	106673935	0.1634	NA	0.1678	Fibromyalgia	Fibromyalgia	Fibromyalgia || ||	TRUE	igd	NA	NA	NA	NA	NA	NA	NA	GCST90199684	1-linoleoylglycerol (18:2) levels	12	106280157	0.0519464	5.82959e-06	8212	TRUE	reported	textfile	2	TRUE
rs62385039	G	A	G	A	-0.258001	-0.2799	0.0201079	0.01386	FALSE	FALSE	FALSE	finn-b-M13_FIBROMYALGIA	6	895420	0.2341	NA	0.2319	Fibromyalgia	Fibromyalgia	Fibromyalgia || ||	TRUE	igd	NA	NA	NA	NA	NA	NA	NA	GCST90199684	1-linoleoylglycerol (18:2) levels	6	895419	0.0552286	2.98985e-06	8212	TRUE	reported	textfile	2	TRUE
rs75445316	T	C	T	C	0.241198	0.0391	0.024875	0.01549	FALSE	FALSE	FALSE	finn-b-M13_FIBROMYALGIA	2	115033746	0.2216	NA	0.8599	Fibromyalgia	Fibromyalgia	Fibromyalgia || ||	TRUE	igd	NA	NA	NA	NA	NA	NA	NA	GCST90199684	1-linoleoylglycerol (18:2) levels	2	114276169	0.049473	1.0862e-06	8212	TRUE	reported	textfile	2	TRUE
rs77982886	G	A	G	A	0.316857	-0.4185	0.0152346	0.005084	FALSE	FALSE	FALSE	finn-b-M13_FIBROMYALGIA	4	64972393	0.3882	NA	0.281	Fibromyalgia	Fibromyalgia	Fibromyalgia || ||	TRUE	igd	NA	NA	NA	NA	NA	NA	NA	GCST90199684	1-linoleoylglycerol (18:2) levels	4	64106675	0.0635267	6.10775e-07	8212	TRUE	reported	textfile	2	TRUE
rs964184	C	G	C	G	-0.116525	-0.1669	0.868723	0.8542	FALSE	TRUE	FALSE	finn-b-M13_FIBROMYALGIA	11	116648917	0.0752	NA	0.0264899	Fibromyalgia	Fibromyalgia	Fibromyalgia || ||	TRUE	igd	NA	NA	NA	NA	NA	NA	NA	GCST90199684	1-linoleoylglycerol (18:2) levels	11	116778201	0.0229017	3.6178e-07	8212	TRUE	reported	textfile	2	TRUE
rs9894638	C	T	C	T	0.0857298	0.0618	0.211593	0.279	FALSE	FALSE	FALSE	finn-b-M13_FIBROMYALGIA	17	44912901	0.0593	NA	0.2975	Fibromyalgia	Fibromyalgia	Fibromyalgia || ||	TRUE	igd	NA	NA	NA	NA	NA	NA	NA	GCST90199684	1-linoleoylglycerol (18:2) levels	17	46835535	0.0192292	8.2607e-06	8212	TRUE	reported	textfile	2	TRUE
rs10006132	A	G	A	G	0.106176	-0.1102	0.813906	0.7781	FALSE	FALSE	FALSE	finn-b-M13_FIBROMYALGIA	4	114743647	0.0635	NA	0.0826799	Fibromyalgia	Fibromyalgia	Fibromyalgia || ||	TRUE	igd	NA	NA	NA	NA	NA	NA	NA	GCST90200510	X-12680 levels	4	113822491	0.0198888	9.37219e-08	8255	TRUE	reported	textfile	2	TRUE
rs113949763	A	G	A	G	-0.0880563	-0.1056	0.182187	0.1532	FALSE	FALSE	FALSE	finn-b-M13_FIBROMYALGIA	1	106546416	0.0737	NA	0.1518	Fibromyalgia	Fibromyalgia	Fibromyalgia || ||	TRUE	igd	NA	NA	NA	NA	NA	NA	NA	GCST90200510	X-12680 levels	1	106003794	0.019815	8.83339e-06	8255	TRUE	reported	textfile	2	TRUE
rs117599044	T	A	T	A	0.148872	-0.0713	0.0571252	0.0421	FALSE	TRUE	FALSE	finn-b-M13_FIBROMYALGIA	7	19127540	0.135	NA	0.5974	Fibromyalgia	Fibromyalgia	Fibromyalgia || ||	TRUE	igd	NA	NA	NA	NA	NA	NA	NA	GCST90200510	X-12680 levels	7	19087917	0.0333783	8.19097e-06	8255	TRUE	reported	textfile	2	TRUE
rs11790084	T	C	T	C	-0.116759	-0.031	0.11494	0.1903	FALSE	FALSE	FALSE	finn-b-M13_FIBROMYALGIA	9	466528	0.0673	NA	0.6455	Fibromyalgia	Fibromyalgia	Fibromyalgia || ||	TRUE	igd	NA	NA	NA	NA	NA	NA	NA	GCST90200510	X-12680 levels	9	466528	0.0239886	1.13151e-06	8255	TRUE	reported	textfile	2	TRUE
rs1232965	G	A	G	A	0.125759	-0.1785	0.899571	0.949	FALSE	FALSE	FALSE	finn-b-M13_FIBROMYALGIA	12	47960471	0.1219	NA	0.1431	Fibromyalgia	Fibromyalgia	Fibromyalgia || ||	TRUE	igd	NA	NA	NA	NA	NA	NA	NA	GCST90200510	X-12680 levels	12	47566688	0.0257188	1.00949e-06	8255	TRUE	reported	textfile	2	TRUE
rs12438406	C	T	C	T	0.0880515	0.0169	0.192031	0.1874	FALSE	FALSE	FALSE	finn-b-M13_FIBROMYALGIA	15	61069471	0.0679	NA	0.8038	Fibromyalgia	Fibromyalgia	Fibromyalgia || ||	TRUE	igd	NA	NA	NA	NA	NA	NA	NA	GCST90200510	X-12680 levels	15	60777272	0.0198886	9.54517e-06	8255	TRUE	reported	textfile	2	TRUE
rs138268615	C	G	C	G	-0.284104	-0.1076	0.0146608	0.02323	FALSE	TRUE	FALSE	finn-b-M13_FIBROMYALGIA	13	94095079	0.1797	NA	0.5496	Fibromyalgia	Fibromyalgia	Fibromyalgia || ||	TRUE	igd	NA	NA	NA	NA	NA	NA	NA	GCST90200510	X-12680 levels	13	93442826	0.0638257	8.53724e-06	8255	TRUE	reported	textfile	2	TRUE
rs17416443	T	A	T	A	0.156625	-0.0139	0.0501949	0.09786	FALSE	TRUE	FALSE	finn-b-M13_FIBROMYALGIA	2	213011505	0.0891	NA	0.8764	Fibromyalgia	Fibromyalgia	Fibromyalgia || ||	TRUE	igd	NA	NA	NA	NA	NA	NA	NA	GCST90200510	X-12680 levels	2	212146780	0.0348708	7.06994e-06	8255	TRUE	reported	textfile	2	TRUE
rs201928	T	C	T	C	0.0707048	-0.0225	0.413	0.4074	FALSE	FALSE	FALSE	finn-b-M13_FIBROMYALGIA	20	17524903	0.0538	NA	0.6753	Fibromyalgia	Fibromyalgia	Fibromyalgia || ||	TRUE	igd	NA	NA	NA	NA	NA	NA	NA	GCST90200510	X-12680 levels	20	17544258	0.0156961	6.64943e-06	8255	TRUE	reported	textfile	2	TRUE
rs468720	A	G	A	G	0.0807866	-0.1235	0.697158	0.7461	FALSE	FALSE	FALSE	finn-b-M13_FIBROMYALGIA	13	56685870	0.0609	NA	0.0425099	Fibromyalgia	Fibromyalgia	Fibromyalgia || ||	TRUE	igd	NA	NA	NA	NA	NA	NA	NA	GCST90200510	X-12680 levels	13	56111736	0.0169477	1.87164e-06	8255	TRUE	reported	textfile	2	TRUE
rs61844105	T	A	T	A	0.118211	0.062	0.0967506	0.1002	FALSE	TRUE	FALSE	finn-b-M13_FIBROMYALGIA	10	17507127	0.0881	NA	0.4814	Fibromyalgia	Fibromyalgia	Fibromyalgia || ||	TRUE	igd	NA	NA	NA	NA	NA	NA	NA	GCST90200510	X-12680 levels	10	17465128	0.0260703	5.77922e-06	8255	TRUE	reported	textfile	2	TRUE
rs62	C	T	C	T	-0.0719258	-0.0557	0.518744	0.4958	FALSE	FALSE	FALSE	finn-b-M13_FIBROMYALGIA	7	11621157	0.053	NA	0.2935	Fibromyalgia	Fibromyalgia	Fibromyalgia || ||	TRUE	igd	NA	NA	NA	NA	NA	NA	NA	GCST90200510	X-12680 levels	7	11581530	0.0161188	8.11101e-06	8255	TRUE	reported	textfile	2	TRUE
rs62278649	A	G	A	G	-0.0812349	-0.0205	0.40421	0.3867	FALSE	FALSE	FALSE	finn-b-M13_FIBROMYALGIA	3	157166855	0.0549	NA	0.708699	Fibromyalgia	Fibromyalgia	Fibromyalgia || ||	TRUE	igd	NA	NA	NA	NA	NA	NA	NA	GCST90200510	X-12680 levels	3	157449066	0.0161594	4.97939e-07	8255	TRUE	reported	textfile	2	TRUE
rs6888519	C	T	C	T	-0.181717	0.0439	0.0387277	0.04848	FALSE	FALSE	FALSE	finn-b-M13_FIBROMYALGIA	5	172171643	0.1232	NA	0.721499	Fibromyalgia	Fibromyalgia	Fibromyalgia || ||	TRUE	igd	NA	NA	NA	NA	NA	NA	NA	GCST90200510	X-12680 levels	5	172744640	0.0397152	4.75097e-06	8255	TRUE	reported	textfile	2	TRUE
rs73164485	T	C	T	C	0.200171	0.1745	0.0424964	0.03356	FALSE	FALSE	FALSE	finn-b-M13_FIBROMYALGIA	13	22602733	0.1484	NA	0.2397	Fibromyalgia	Fibromyalgia	Fibromyalgia || ||	TRUE	igd	NA	NA	NA	NA	NA	NA	NA	GCST90200510	X-12680 levels	13	22028594	0.0381791	1.58034e-07	8255	TRUE	reported	textfile	2	TRUE
rs74459194	A	C	A	C	-0.259661	0.1458	0.0173396	0.006368	FALSE	FALSE	FALSE	finn-b-M13_FIBROMYALGIA	14	60770519	0.327	NA	0.6556	Fibromyalgia	Fibromyalgia	Fibromyalgia || ||	TRUE	igd	NA	NA	NA	NA	NA	NA	NA	GCST90200510	X-12680 levels	14	60303801	0.0584193	8.79856e-06	8255	TRUE	reported	textfile	2	TRUE
rs75693448	T	C	T	C	-0.118346	0.0544	0.106522	0.1317	FALSE	FALSE	FALSE	finn-b-M13_FIBROMYALGIA	19	16995072	0.0796	NA	0.494399	Fibromyalgia	Fibromyalgia	Fibromyalgia || ||	TRUE	igd	NA	NA	NA	NA	NA	NA	NA	GCST90200510	X-12680 levels	19	16884261	0.0250911	2.39758e-06	8255	TRUE	reported	textfile	2	TRUE
rs10006723	T	G	T	G	0.170956	-0.1441	0.052858	0.04585	FALSE	FALSE	FALSE	finn-b-M13_FIBROMYALGIA	4	102673734	0.1284	NA	0.2617	Fibromyalgia	Fibromyalgia	Fibromyalgia || ||	TRUE	igd	NA	NA	NA	NA	NA	NA	NA	GCST90199621	Carnitine levels	4	101752577	0.0345341	7.40711e-07	8192	TRUE	reported	textfile	2	TRUE
rs10826332	A	T	A	T	-0.142187	0.1229	0.0770596	0.04026	FALSE	TRUE	FALSE	finn-b-M13_FIBROMYALGIA	10	61380266	0.135	NA	0.3625	Fibromyalgia	Fibromyalgia	Fibromyalgia || ||	TRUE	igd	NA	NA	NA	NA	NA	NA	NA	GCST90199621	Carnitine levels	10	59620508	0.0286481	6.9336e-07	8192	TRUE	reported	textfile	2	TRUE
rs10900223	C	T	C	T	-0.105448	0.0325	0.250122	0.2849	FALSE	FALSE	FALSE	finn-b-M13_FIBROMYALGIA	10	46021631	0.0586	NA	0.578599	Fibromyalgia	Fibromyalgia	Fibromyalgia || ||	TRUE	igd	NA	NA	NA	NA	NA	NA	NA	GCST90199621	Carnitine levels	10	45526183	0.0176162	2.15271e-09	8192	TRUE	reported	textfile	2	TRUE
rs112819917	A	G	A	G	-0.438422	0.1271	0.00817656	0.003167	FALSE	FALSE	FALSE	finn-b-M13_FIBROMYALGIA	6	58636718	0.4811	NA	0.7916	Fibromyalgia	Fibromyalgia	Fibromyalgia || ||	TRUE	igd	NA	NA	NA	NA	NA	NA	NA	GCST90199621	Carnitine levels	6	58310440	0.0855532	2.98241e-07	8192	TRUE	reported	textfile	2	TRUE
rs1171617	T	G	T	G	0.443332	-0.1347	0.770118	0.8405	FALSE	FALSE	FALSE	finn-b-M13_FIBROMYALGIA	10	61467182	0.0723	NA	0.0622902	Fibromyalgia	Fibromyalgia	Fibromyalgia || ||	TRUE	igd	NA	NA	NA	NA	NA	NA	NA	GCST90199621	Carnitine levels	10	59707424	0.0179927	4.75726e-134	8192	TRUE	reported	textfile	2	TRUE
rs11871125	T	C	T	C	0.072665	-0.0143	0.394949	0.282	FALSE	FALSE	FALSE	finn-b-M13_FIBROMYALGIA	17	19438321	0.0596	NA	0.8109	Fibromyalgia	Fibromyalgia	Fibromyalgia || ||	TRUE	igd	TRUE	rs11871125	rs2453580	T	C	C	T	GCST90199621	Carnitine levels	17	19529080	0.0157893	4.1814e-06	8192	TRUE	reported	textfile	2	TRUE
rs13026148	A	G	A	G	-0.0706059	0.1167	0.378223	0.3485	FALSE	FALSE	FALSE	finn-b-M13_FIBROMYALGIA	2	215514568	0.0549	NA	0.0335097	Fibromyalgia	Fibromyalgia	Fibromyalgia || ||	TRUE	igd	NA	NA	NA	NA	NA	NA	NA	GCST90199621	Carnitine levels	2	214649844	0.0158653	8.57356e-06	8192	TRUE	reported	textfile	2	TRUE
rs13247874	T	C	T	C	-0.103668	0.0532	0.190234	0.1776	FALSE	FALSE	FALSE	finn-b-M13_FIBROMYALGIA	7	73010442	0.0695	NA	0.4434	Fibromyalgia	Fibromyalgia	Fibromyalgia || ||	TRUE	igd	NA	NA	NA	NA	NA	NA	NA	GCST90199621	Carnitine levels	7	73596112	0.0195859	1.20324e-07	8192	TRUE	reported	textfile	2	TRUE
rs138190991	A	T	A	T	-0.212246	0.4271	0.0301671	0.03375	FALSE	TRUE	FALSE	finn-b-M13_FIBROMYALGIA	10	61744076	0.1474	NA	0.00377303	Fibromyalgia	Fibromyalgia	Fibromyalgia || ||	TRUE	igd	NA	NA	NA	NA	NA	NA	NA	GCST90199621	Carnitine levels	10	59984318	0.0448917	2.26798e-06	8192	TRUE	reported	textfile	2	TRUE
rs149235996	G	A	G	A	-0.56909	0.546	0.0120372	0.00464	FALSE	FALSE	FALSE	finn-b-M13_FIBROMYALGIA	5	150719909	0.3805	NA	0.1514	Fibromyalgia	Fibromyalgia	Fibromyalgia || ||	TRUE	igd	NA	NA	NA	NA	NA	NA	NA	GCST90199621	Carnitine levels	5	151340348	0.0700396	4.46387e-16	8192	TRUE	reported	textfile	2	TRUE
rs1511808	T	C	T	C	-0.0697692	-0.0309	0.615503	0.6029	FALSE	FALSE	FALSE	finn-b-M13_FIBROMYALGIA	4	189345908	0.0542	NA	0.5689	Fibromyalgia	Fibromyalgia	Fibromyalgia || ||	TRUE	igd	NA	NA	NA	NA	NA	NA	NA	GCST90199621	Carnitine levels	4	188424754	0.0157378	9.28299e-06	8192	TRUE	reported	textfile	2	TRUE
rs1765260	A	G	A	G	-0.0999797	-0.155	0.153343	0.08036	FALSE	FALSE	FALSE	finn-b-M13_FIBROMYALGIA	15	79866347	0.0989	NA	0.1173	Fibromyalgia	Fibromyalgia	Fibromyalgia || ||	TRUE	igd	NA	NA	NA	NA	NA	NA	NA	GCST90199621	Carnitine levels	15	79574005	0.0211507	2.27832e-06	8192	TRUE	reported	textfile	2	TRUE
rs2512510	A	G	A	G	-0.0870239	0.0869	0.216759	0.2531	FALSE	FALSE	FALSE	finn-b-M13_FIBROMYALGIA	11	80113567	0.061	NA	0.1545	Fibromyalgia	Fibromyalgia	Fibromyalgia || ||	TRUE	igd	NA	NA	NA	NA	NA	NA	NA	GCST90199621	Carnitine levels	11	80402523	0.0186419	3.03877e-06	8192	TRUE	reported	textfile	2	TRUE
rs2625939	T	C	T	C	0.0859678	0.0014	0.228206	0.1625	FALSE	FALSE	FALSE	finn-b-M13_FIBROMYALGIA	12	95017410	0.0718	NA	0.9842	Fibromyalgia	Fibromyalgia	Fibromyalgia || ||	TRUE	igd	NA	NA	NA	NA	NA	NA	NA	GCST90199621	Carnitine levels	12	94623634	0.0183528	2.81073e-06	8192	TRUE	reported	textfile	2	TRUE
rs55775057	A	G	A	G	-0.0960378	-0.0647	0.150493	0.1271	FALSE	FALSE	FALSE	finn-b-M13_FIBROMYALGIA	11	20167908	0.0811	NA	0.4247	Fibromyalgia	Fibromyalgia	Fibromyalgia || ||	TRUE	igd	NA	NA	NA	NA	NA	NA	NA	GCST90199621	Carnitine levels	11	20146362	0.0215564	8.38207e-06	8192	TRUE	reported	textfile	2	TRUE
rs72836546	T	C	T	C	-0.0906795	0.0097	0.23482	0.2182	FALSE	FALSE	FALSE	finn-b-M13_FIBROMYALGIA	6	14093319	0.064	NA	0.879	Fibromyalgia	Fibromyalgia	Fibromyalgia || ||	TRUE	igd	NA	NA	NA	NA	NA	NA	NA	GCST90199621	Carnitine levels	6	14093088	0.0180707	5.22043e-07	8192	TRUE	reported	textfile	2	TRUE
rs73006619	C	A	C	A	-0.168203	-0.0962	0.0466597	0.03854	FALSE	FALSE	FALSE	finn-b-M13_FIBROMYALGIA	19	20680913	0.142	NA	0.498101	Fibromyalgia	Fibromyalgia	Fibromyalgia || ||	TRUE	igd	NA	NA	NA	NA	NA	NA	NA	GCST90199621	Carnitine levels	19	20498107	0.0368665	5.05538e-06	8192	TRUE	reported	textfile	2	TRUE
rs73025372	G	A	G	A	0.157569	-0.1044	0.0515375	0.04057	FALSE	FALSE	FALSE	finn-b-M13_FIBROMYALGIA	3	15314364	0.1339	NA	0.4356	Fibromyalgia	Fibromyalgia	Fibromyalgia || ||	TRUE	igd	NA	NA	NA	NA	NA	NA	NA	GCST90199621	Carnitine levels	3	15272857	0.0346167	5.31831e-06	8192	TRUE	reported	textfile	2	TRUE
rs7537155	A	G	A	G	-0.0900652	-0.0104	0.199113	0.3045	FALSE	FALSE	FALSE	finn-b-M13_FIBROMYALGIA	1	19206621	0.0578	NA	0.8566	Fibromyalgia	Fibromyalgia	Fibromyalgia || ||	TRUE	igd	NA	NA	NA	NA	NA	NA	NA	GCST90199621	Carnitine levels	1	18880127	0.019229	2.81588e-06	8192	TRUE	reported	textfile	2	TRUE
rs76187828	G	A	G	A	-0.117619	0.0809	0.0930578	0.1146	FALSE	FALSE	FALSE	finn-b-M13_FIBROMYALGIA	10	34051881	0.0834	NA	0.3315	Fibromyalgia	Fibromyalgia	Fibromyalgia || ||	TRUE	igd	NA	NA	NA	NA	NA	NA	NA	GCST90199621	Carnitine levels	10	33762953	0.0264472	8.69448e-06	8192	TRUE	reported	textfile	2	TRUE
rs76638161	T	C	T	C	0.192728	0.0591	0.0318954	0.005975	FALSE	FALSE	FALSE	finn-b-M13_FIBROMYALGIA	11	109094318	0.3434	NA	0.8633	Fibromyalgia	Fibromyalgia	Fibromyalgia || ||	TRUE	igd	NA	NA	NA	NA	NA	NA	NA	GCST90199621	Carnitine levels	11	109223591	0.0434891	9.35172e-06	8192	TRUE	reported	textfile	2	TRUE
rs7705826	G	T	G	T	0.199276	0.0046	0.833702	0.8635	FALSE	FALSE	FALSE	finn-b-M13_FIBROMYALGIA	5	131732456	0.0771	NA	0.9529	Fibromyalgia	Fibromyalgia	Fibromyalgia || ||	TRUE	igd	NA	NA	NA	NA	NA	NA	NA	GCST90199621	Carnitine levels	5	132396764	0.0204928	2.37787e-22	8192	TRUE	reported	textfile	2	TRUE
rs78428648	A	G	A	G	0.179162	0.0704	0.0377174	0.03154	FALSE	FALSE	FALSE	finn-b-M13_FIBROMYALGIA	8	116049077	0.1522	NA	0.643701	Fibromyalgia	Fibromyalgia	Fibromyalgia || ||	TRUE	igd	NA	NA	NA	NA	NA	NA	NA	GCST90199621	Carnitine levels	8	115036848	0.0400467	7.68304e-06	8192	TRUE	reported	textfile	2	TRUE
rs78562549	T	G	T	G	0.394897	-0.1626	0.00740514	0.01719	FALSE	FALSE	FALSE	finn-b-M13_FIBROMYALGIA	2	36295898	0.2065	NA	0.431	Fibromyalgia	Fibromyalgia	Fibromyalgia || ||	TRUE	igd	NA	NA	NA	NA	NA	NA	NA	GCST90199621	Carnitine levels	2	36068755	0.0881915	7.54445e-06	8192	TRUE	reported	textfile	2	TRUE
rs79717472	G	A	G	A	-0.218081	-0.0794	0.0280471	0.009384	FALSE	FALSE	FALSE	finn-b-M13_FIBROMYALGIA	9	123616161	0.2772	NA	0.774599	Fibromyalgia	Fibromyalgia	Fibromyalgia || ||	TRUE	igd	NA	NA	NA	NA	NA	NA	NA	GCST90199621	Carnitine levels	9	120853883	0.0461728	2.32235e-06	8192	TRUE	reported	textfile	2	TRUE
rs10006729	G	A	G	A	-0.069881	0.0431	0.468575	0.4028	FALSE	FALSE	FALSE	finn-b-M13_FIBROMYALGIA	4	148510796	0.0541	NA	0.4253	Fibromyalgia	Fibromyalgia	Fibromyalgia || ||	TRUE	igd	NA	NA	NA	NA	NA	NA	NA	GCST90200868	Isoleucine to phosphate ratio	4	147589644	0.0146229	1.76268e-06	8298	TRUE	reported	textfile	2	TRUE
rs10227729	C	T	C	T	0.097048	-0.0315	0.16595	0.1938	FALSE	FALSE	FALSE	finn-b-M13_FIBROMYALGIA	7	25505757	0.0672	NA	0.639401	Fibromyalgia	Fibromyalgia	Fibromyalgia || ||	TRUE	igd	NA	NA	NA	NA	NA	NA	NA	GCST90200868	Isoleucine to phosphate ratio	7	25466138	0.0197725	9.18965e-07	8298	TRUE	reported	textfile	2	TRUE
rs11066875	T	C	T	C	0.152119	-0.0361	0.0657736	0.07248	FALSE	FALSE	FALSE	finn-b-M13_FIBROMYALGIA	12	114434848	0.102	NA	0.723401	Fibromyalgia	Fibromyalgia	Fibromyalgia || ||	TRUE	igd	NA	NA	NA	NA	NA	NA	NA	GCST90200868	Isoleucine to phosphate ratio	12	113997043	0.0290453	1.62954e-07	8298	TRUE	reported	textfile	2	TRUE
rs114600258	A	G	A	G	0.279245	0.4326	0.0153252	0.004345	FALSE	FALSE	FALSE	finn-b-M13_FIBROMYALGIA	2	241079807	0.3897	NA	0.2669	Fibromyalgia	Fibromyalgia	Fibromyalgia || ||	TRUE	igd	NA	NA	NA	NA	NA	NA	NA	GCST90200868	Isoleucine to phosphate ratio	2	240140390	0.0589082	2.13364e-06	8298	TRUE	reported	textfile	2	TRUE
rs11626897	A	G	A	G	0.157981	0.1067	0.0526703	0.07309	FALSE	FALSE	FALSE	finn-b-M13_FIBROMYALGIA	14	102879098	0.1025	NA	0.2982	Fibromyalgia	Fibromyalgia	Fibromyalgia || ||	TRUE	igd	NA	NA	NA	NA	NA	NA	NA	GCST90200868	Isoleucine to phosphate ratio	14	102412761	0.0328327	1.49652e-06	8298	TRUE	reported	textfile	2	TRUE
rs11661293	T	C	T	C	0.0931655	-0.0722	0.149473	0.1456	FALSE	FALSE	FALSE	finn-b-M13_FIBROMYALGIA	18	65377835	0.0751	NA	0.3365	Fibromyalgia	Fibromyalgia	Fibromyalgia || ||	TRUE	igd	NA	NA	NA	NA	NA	NA	NA	GCST90200868	Isoleucine to phosphate ratio	18	67710598	0.0202932	4.41195e-06	8298	TRUE	reported	textfile	2	TRUE
rs12918636	C	A	C	A	0.106738	-0.0686	0.125459	0.1403	FALSE	FALSE	FALSE	finn-b-M13_FIBROMYALGIA	16	77901144	0.0767	NA	0.371	Fibromyalgia	Fibromyalgia	Fibromyalgia || ||	TRUE	igd	NA	NA	NA	NA	NA	NA	NA	GCST90200868	Isoleucine to phosphate ratio	16	77867247	0.0227824	2.79787e-06	8298	TRUE	reported	textfile	2	TRUE
rs17558155	A	C	A	C	0.117099	0.11	0.0956644	0.1108	FALSE	FALSE	FALSE	finn-b-M13_FIBROMYALGIA	10	9337376	0.084	NA	0.1905	Fibromyalgia	Fibromyalgia	Fibromyalgia || ||	TRUE	igd	NA	NA	NA	NA	NA	NA	NA	GCST90200868	Isoleucine to phosphate ratio	10	9295413	0.0248651	2.48485e-06	8298	TRUE	reported	textfile	2	TRUE
rs193152187	T	G	T	G	0.331727	0.1174	0.00951169	0.01537	FALSE	FALSE	FALSE	finn-b-M13_FIBROMYALGIA	5	74394011	0.2179	NA	0.59	Fibromyalgia	Fibromyalgia	Fibromyalgia || ||	TRUE	igd	NA	NA	NA	NA	NA	NA	NA	GCST90200868	Isoleucine to phosphate ratio	5	75098186	0.0750983	9.99728e-06	8298	TRUE	reported	textfile	2	TRUE
rs2591078	C	T	C	T	-0.0720375	-0.0564	0.475678	0.5575	FALSE	FALSE	FALSE	finn-b-M13_FIBROMYALGIA	14	76583775	0.0534	NA	0.2913	Fibromyalgia	Fibromyalgia	Fibromyalgia || ||	TRUE	igd	NA	NA	NA	NA	NA	NA	NA	GCST90200868	Isoleucine to phosphate ratio	14	76117432	0.0145929	7.95487e-07	8298	TRUE	reported	textfile	2	TRUE
rs4433560	A	T	A	T	-0.0944584	-0.0144	0.159523	0.141	FALSE	TRUE	FALSE	finn-b-M13_FIBROMYALGIA	11	45253866	0.0768	NA	0.8511	Fibromyalgia	Fibromyalgia	Fibromyalgia || ||	TRUE	igd	NA	NA	NA	NA	NA	NA	NA	GCST90200868	Isoleucine to phosphate ratio	11	45232315	0.0200021	2.33046e-06	8298	TRUE	reported	textfile	2	TRUE
rs563612718	T	A	T	A	-0.249173	-0.2058	0.0172414	0.01661	FALSE	TRUE	FALSE	finn-b-M13_FIBROMYALGIA	19	15267150	0.2109	NA	0.3292	Fibromyalgia	Fibromyalgia	Fibromyalgia || ||	TRUE	igd	NA	NA	NA	NA	NA	NA	NA	GCST90200868	Isoleucine to phosphate ratio	19	15156339	0.0559722	8.518e-06	8298	TRUE	reported	textfile	2	TRUE
rs59995039	C	G	C	G	-0.0813922	-0.1058	0.20028	0.1629	FALSE	TRUE	FALSE	finn-b-M13_FIBROMYALGIA	2	106114235	0.0723	NA	0.1431	Fibromyalgia	Fibromyalgia	Fibromyalgia || ||	TRUE	igd	NA	NA	NA	NA	NA	NA	NA	GCST90200868	Isoleucine to phosphate ratio	2	105497778	0.0182508	8.20962e-06	8298	TRUE	reported	textfile	2	TRUE
rs62093367	A	G	A	G	0.0957318	-0.0141	0.133088	0.142	FALSE	FALSE	FALSE	finn-b-M13_FIBROMYALGIA	18	48900980	0.0765	NA	0.854	Fibromyalgia	Fibromyalgia	Fibromyalgia || ||	TRUE	igd	NA	NA	NA	NA	NA	NA	NA	GCST90200868	Isoleucine to phosphate ratio	18	51374610	0.0215811	9.16852e-06	8298	TRUE	reported	textfile	2	TRUE
rs6942431	G	A	G	A	-0.0681398	0.1851	0.355248	0.3799	FALSE	FALSE	FALSE	finn-b-M13_FIBROMYALGIA	7	41015761	0.0546	NA	0.000703607	Fibromyalgia	Fibromyalgia	Fibromyalgia || ||	TRUE	igd	NA	NA	NA	NA	NA	NA	NA	GCST90200868	Isoleucine to phosphate ratio	7	40976163	0.0153805	9.41207e-06	8298	TRUE	reported	textfile	2	TRUE
rs707063	A	T	A	T	0.105644	-0.1209	0.123398	0.1335	FALSE	TRUE	FALSE	finn-b-M13_FIBROMYALGIA	2	155297402	0.0777	NA	0.1197	Fibromyalgia	Fibromyalgia	Fibromyalgia || ||	TRUE	igd	TRUE	rs707063	rs707068	A	T	G	T	GCST90200868	Isoleucine to phosphate ratio	2	154428791	0.0222303	2.01169e-06	8298	TRUE	reported	textfile	2	TRUE
rs73271806	T	C	T	C	-0.113331	0.0085	0.110005	0.05611	FALSE	FALSE	FALSE	finn-b-M13_FIBROMYALGIA	20	50080983	0.117	NA	0.9424	Fibromyalgia	Fibromyalgia	Fibromyalgia || ||	TRUE	igd	NA	NA	NA	NA	NA	NA	NA	GCST90200868	Isoleucine to phosphate ratio	20	51464446	0.0232157	1.0519e-06	8298	TRUE	reported	textfile	2	TRUE
rs75847252	C	T	C	T	0.253807	-0.0272	0.0183104	0.00667	FALSE	FALSE	FALSE	finn-b-M13_FIBROMYALGIA	9	71483481	0.3285	NA	0.934	Fibromyalgia	Fibromyalgia	Fibromyalgia || ||	TRUE	igd	NA	NA	NA	NA	NA	NA	NA	GCST90200868	Isoleucine to phosphate ratio	9	68868565	0.0541714	2.79605e-06	8298	TRUE	reported	textfile	2	TRUE
rs77275380	T	C	T	C	0.308325	0.0306	0.0111272	0.02709	FALSE	FALSE	FALSE	finn-b-M13_FIBROMYALGIA	2	178869476	0.1594	NA	0.8476	Fibromyalgia	Fibromyalgia	Fibromyalgia || ||	TRUE	igd	NA	NA	NA	NA	NA	NA	NA	GCST90200868	Isoleucine to phosphate ratio	2	178004749	0.0690998	8.11854e-06	8298	TRUE	reported	textfile	2	TRUE
rs7779835	C	T	C	T	0.22396	0.0229	0.0219102	0.01959	FALSE	FALSE	FALSE	finn-b-M13_FIBROMYALGIA	7	79686983	0.1905	NA	0.9041	Fibromyalgia	Fibromyalgia	Fibromyalgia || ||	TRUE	igd	NA	NA	NA	NA	NA	NA	NA	GCST90200868	Isoleucine to phosphate ratio	7	80057667	0.0495221	6.11328e-06	8298	TRUE	reported	textfile	2	TRUE
rs78145602	T	C	T	C	-0.17984	0.0655	0.0429735	0.02357	FALSE	FALSE	FALSE	finn-b-M13_FIBROMYALGIA	8	64850419	0.1772	NA	0.7117	Fibromyalgia	Fibromyalgia	Fibromyalgia || ||	TRUE	igd	NA	NA	NA	NA	NA	NA	NA	GCST90200868	Isoleucine to phosphate ratio	8	63937862	0.0355643	4.26464e-07	8298	TRUE	reported	textfile	2	TRUE
rs78608855	G	C	G	C	0.280925	-0.6707	0.0135744	0.003722	FALSE	TRUE	FALSE	finn-b-M13_FIBROMYALGIA	3	21670689	0.4503	NA	0.1364	Fibromyalgia	Fibromyalgia	Fibromyalgia || ||	TRUE	igd	NA	NA	NA	NA	NA	NA	NA	GCST90200868	Isoleucine to phosphate ratio	3	21629197	0.0629841	8.18629e-06	8298	TRUE	reported	textfile	2	TRUE
rs80084508	T	G	T	G	-0.121794	-0.124	0.0806452	0.0547	FALSE	FALSE	FALSE	finn-b-M13_FIBROMYALGIA	8	3473315	0.1183	NA	0.2943	Fibromyalgia	Fibromyalgia	Fibromyalgia || ||	TRUE	igd	NA	NA	NA	NA	NA	NA	NA	GCST90200868	Isoleucine to phosphate ratio	8	3615793	0.0270413	6.66881e-06	8298	TRUE	reported	textfile	2	TRUE
rs80197269	G	A	G	A	-0.152764	0.3316	0.0495468	0.02646	FALSE	FALSE	FALSE	finn-b-M13_FIBROMYALGIA	6	91505161	0.1687	NA	0.0492697	Fibromyalgia	Fibromyalgia	Fibromyalgia || ||	TRUE	igd	NA	NA	NA	NA	NA	NA	NA	GCST90200868	Isoleucine to phosphate ratio	6	90795443	0.0331395	4.03211e-06	8298	TRUE	reported	textfile	2	TRUE
rs9643611	G	T	G	T	0.076665	0.0336	0.24828	0.2999	FALSE	FALSE	FALSE	finn-b-M13_FIBROMYALGIA	8	70809973	0.0584	NA	0.565501	Fibromyalgia	Fibromyalgia	Fibromyalgia || ||	TRUE	igd	NA	NA	NA	NA	NA	NA	NA	GCST90200868	Isoleucine to phosphate ratio	8	69897738	0.0168616	5.4487e-06	8298	TRUE	reported	textfile	2	TRUE
rs1000768	T	G	T	G	0.0683876	-0.0813	0.549981	0.6616	FALSE	FALSE	FALSE	finn-b-M13_FIBROMYALGIA	11	34513932	0.0562	NA	0.1481	Fibromyalgia	Fibromyalgia	Fibromyalgia || ||	TRUE	igd	NA	NA	NA	NA	NA	NA	NA	GCST90200105	Glycosyl-N-behenoyl-sphingadienine (d18:2/22:0) levels	11	34492385	0.0154364	9.41139e-06	8232	TRUE	reported	textfile	2	TRUE
rs10511533	C	T	C	T	-0.179238	-0.0475	0.0405208	0.06503	FALSE	FALSE	FALSE	finn-b-M13_FIBROMYALGIA	9	10115598	0.1074	NA	0.6584	Fibromyalgia	Fibromyalgia	Fibromyalgia || ||	TRUE	igd	NA	NA	NA	NA	NA	NA	NA	GCST90200105	Glycosyl-N-behenoyl-sphingadienine (d18:2/22:0) levels	9	10115598	0.0382674	2.81562e-06	8232	TRUE	reported	textfile	2	TRUE
rs10823631	G	A	G	A	0.0986998	-0.1491	0.324848	0.4307	FALSE	FALSE	FALSE	finn-b-M13_FIBROMYALGIA	10	72625741	0.0534	NA	0.00524397	Fibromyalgia	Fibromyalgia	Fibromyalgia || ||	TRUE	igd	NA	NA	NA	NA	NA	NA	NA	GCST90200105	Glycosyl-N-behenoyl-sphingadienine (d18:2/22:0) levels	10	70865984	0.0161334	9.49297e-10	8232	TRUE	reported	textfile	2	TRUE
rs10908901	T	C	T	C	-0.46639	-0.1919	0.00561386	0.00159	FALSE	FALSE	FALSE	finn-b-M13_FIBROMYALGIA	9	92223189	0.6491	NA	0.767499	Fibromyalgia	Fibromyalgia	Fibromyalgia || ||	TRUE	igd	NA	NA	NA	NA	NA	NA	NA	GCST90200105	Glycosyl-N-behenoyl-sphingadienine (d18:2/22:0) levels	9	89608274	0.101827	4.64505e-06	8232	TRUE	reported	textfile	2	TRUE
rs11647674	T	G	T	G	-0.0747483	0.0131	0.646406	0.6267	FALSE	FALSE	FALSE	finn-b-M13_FIBROMYALGIA	16	78392409	0.0546	NA	0.8111	Fibromyalgia	Fibromyalgia	Fibromyalgia || ||	TRUE	igd	NA	NA	NA	NA	NA	NA	NA	GCST90200105	Glycosyl-N-behenoyl-sphingadienine (d18:2/22:0) levels	16	78358512	0.0159924	2.95388e-06	8232	TRUE	reported	textfile	2	TRUE
rs11722463	A	G	A	G	0.163258	0.1353	0.368972	0.294	FALSE	FALSE	FALSE	finn-b-M13_FIBROMYALGIA	4	48038716	0.0584	NA	0.0204998	Fibromyalgia	Fibromyalgia	Fibromyalgia || ||	TRUE	igd	NA	NA	NA	NA	NA	NA	NA	GCST90200105	Glycosyl-N-behenoyl-sphingadienine (d18:2/22:0) levels	4	48036699	0.015626	1.49884e-25	8232	TRUE	reported	textfile	2	TRUE
rs117394165	T	C	T	C	0.180797	-0.07	0.0375076	0.01756	FALSE	FALSE	FALSE	finn-b-M13_FIBROMYALGIA	11	66456402	0.2069	NA	0.735099	Fibromyalgia	Fibromyalgia	Fibromyalgia || ||	TRUE	igd	NA	NA	NA	NA	NA	NA	NA	GCST90200105	Glycosyl-N-behenoyl-sphingadienine (d18:2/22:0) levels	11	66688931	0.0398928	5.84101e-06	8232	TRUE	reported	textfile	2	TRUE
rs118019327	C	A	C	A	0.305951	-0.0386	0.0141205	0.007247	FALSE	FALSE	FALSE	finn-b-M13_FIBROMYALGIA	10	131552196	0.3343	NA	0.908	Fibromyalgia	Fibromyalgia	Fibromyalgia || ||	TRUE	igd	NA	NA	NA	NA	NA	NA	NA	GCST90200105	Glycosyl-N-behenoyl-sphingadienine (d18:2/22:0) levels	10	129753932	0.0643906	2.01923e-06	8232	TRUE	reported	textfile	2	TRUE
rs12113068	T	G	T	G	0.17193	0.0043	0.0515936	0.02288	FALSE	FALSE	FALSE	finn-b-M13_FIBROMYALGIA	7	155227866	0.1772	NA	0.9808	Fibromyalgia	Fibromyalgia	Fibromyalgia || ||	TRUE	igd	NA	NA	NA	NA	NA	NA	NA	GCST90200105	Glycosyl-N-behenoyl-sphingadienine (d18:2/22:0) levels	7	155435171	0.0344189	5.87723e-07	8232	TRUE	reported	textfile	2	TRUE
rs12193198	A	G	A	G	0.0714555	0.0432	0.450625	0.4447	FALSE	FALSE	FALSE	finn-b-M13_FIBROMYALGIA	6	169734411	0.0535	NA	0.4191	Fibromyalgia	Fibromyalgia	Fibromyalgia || ||	TRUE	igd	NA	NA	NA	NA	NA	NA	NA	GCST90200105	Glycosyl-N-behenoyl-sphingadienine (d18:2/22:0) levels	6	169334316	0.0153453	3.21615e-06	8232	TRUE	reported	textfile	2	TRUE
rs139356071	A	G	A	G	-0.305825	0.4007	0.0140336	0.00245	FALSE	FALSE	FALSE	finn-b-M13_FIBROMYALGIA	14	38627434	0.5642	NA	0.4775	Fibromyalgia	Fibromyalgia	Fibromyalgia || ||	TRUE	igd	NA	NA	NA	NA	NA	NA	NA	GCST90200105	Glycosyl-N-behenoyl-sphingadienine (d18:2/22:0) levels	14	38158229	0.065094	2.62464e-06	8232	TRUE	reported	textfile	2	TRUE
rs1784494	A	G	A	G	-0.0740639	-0.0005	0.551793	0.4579	FALSE	FALSE	FALSE	finn-b-M13_FIBROMYALGIA	8	107686072	0.0531	NA	0.9923	Fibromyalgia	Fibromyalgia	Fibromyalgia || ||	TRUE	igd	NA	NA	NA	NA	NA	NA	NA	GCST90200105	Glycosyl-N-behenoyl-sphingadienine (d18:2/22:0) levels	8	106673844	0.0151951	1.09251e-06	8232	TRUE	reported	textfile	2	TRUE
rs261290	C	T	C	T	-0.0760656	0.0433	0.657281	0.6179	FALSE	FALSE	FALSE	finn-b-M13_FIBROMYALGIA	15	58678720	0.0545	NA	0.4261	Fibromyalgia	Fibromyalgia	Fibromyalgia || ||	TRUE	igd	NA	NA	NA	NA	NA	NA	NA	GCST90200105	Glycosyl-N-behenoyl-sphingadienine (d18:2/22:0) levels	15	58386521	0.0163746	3.3951e-06	8232	TRUE	reported	textfile	2	TRUE
rs28416749	C	T	C	T	0.0893799	-0.0036	0.218276	0.1884	FALSE	FALSE	FALSE	finn-b-M13_FIBROMYALGIA	4	47544632	0.0689	NA	0.9581	Fibromyalgia	Fibromyalgia	Fibromyalgia || ||	TRUE	igd	NA	NA	NA	NA	NA	NA	NA	GCST90200105	Glycosyl-N-behenoyl-sphingadienine (d18:2/22:0) levels	4	47542615	0.0188068	2.00883e-06	8232	TRUE	reported	textfile	2	TRUE
rs2989751	G	A	G	A	-0.0798624	0.0239	0.752606	0.7354	FALSE	FALSE	FALSE	finn-b-M13_FIBROMYALGIA	9	96376398	0.06	NA	0.6903	Fibromyalgia	Fibromyalgia	Fibromyalgia || ||	TRUE	igd	TRUE	rs2989751	rs2250344	A	G	T	C	GCST90200105	Glycosyl-N-behenoyl-sphingadienine (d18:2/22:0) levels	9	93604365	0.0176439	6.00149e-06	8232	TRUE	reported	textfile	2	TRUE
rs35818294	A	C	A	C	0.300353	-0.0076	0.176799	0.2002	FALSE	FALSE	FALSE	finn-b-M13_FIBROMYALGIA	4	47545141	0.0667	NA	0.9092	Fibromyalgia	Fibromyalgia	Fibromyalgia || ||	TRUE	igd	NA	NA	NA	NA	NA	NA	NA	GCST90200105	Glycosyl-N-behenoyl-sphingadienine (d18:2/22:0) levels	4	47543124	0.0198764	1.36982e-51	8232	TRUE	reported	textfile	2	TRUE
rs3750434	A	G	A	G	0.103985	0.0499	0.425369	0.4632	FALSE	FALSE	FALSE	finn-b-M13_FIBROMYALGIA	9	35739876	0.0532	NA	0.3488	Fibromyalgia	Fibromyalgia	Fibromyalgia || ||	TRUE	igd	NA	NA	NA	NA	NA	NA	NA	GCST90200105	Glycosyl-N-behenoyl-sphingadienine (d18:2/22:0) levels	9	35739879	0.0153983	1.44811e-11	8232	TRUE	reported	textfile	2	TRUE
rs728185	G	A	G	A	-0.131589	0.1001	0.075142	0.07546	FALSE	FALSE	FALSE	finn-b-M13_FIBROMYALGIA	8	94275977	0.1002	NA	0.318	Fibromyalgia	Fibromyalgia	Fibromyalgia || ||	TRUE	igd	NA	NA	NA	NA	NA	NA	NA	GCST90200105	Glycosyl-N-behenoyl-sphingadienine (d18:2/22:0) levels	8	93263749	0.0293093	7.13336e-06	8232	TRUE	reported	textfile	2	TRUE
rs73053944	G	C	G	C	-0.275566	0.2417	0.0165865	0.03219	FALSE	TRUE	FALSE	finn-b-M13_FIBROMYALGIA	19	49930295	0.151	NA	0.1095	Fibromyalgia	Fibromyalgia	Fibromyalgia || ||	TRUE	igd	NA	NA	NA	NA	NA	NA	NA	GCST90200105	Glycosyl-N-behenoyl-sphingadienine (d18:2/22:0) levels	19	49427038	0.0597631	4.00795e-06	8232	TRUE	reported	textfile	2	TRUE
rs7320739	G	T	G	T	-0.0952298	0.0265	0.167324	0.1713	FALSE	FALSE	FALSE	finn-b-M13_FIBROMYALGIA	13	106938049	0.0706	NA	0.707499	Fibromyalgia	Fibromyalgia	Fibromyalgia || ||	TRUE	igd	NA	NA	NA	NA	NA	NA	NA	GCST90200105	Glycosyl-N-behenoyl-sphingadienine (d18:2/22:0) levels	13	106285700	0.0204931	3.36922e-06	8232	TRUE	reported	textfile	2	TRUE
rs7585677	G	A	G	A	0.0696798	0.0641	0.429949	0.4211	FALSE	FALSE	FALSE	finn-b-M13_FIBROMYALGIA	2	184525038	0.0538	NA	0.2332	Fibromyalgia	Fibromyalgia	Fibromyalgia || ||	TRUE	igd	NA	NA	NA	NA	NA	NA	NA	GCST90200105	Glycosyl-N-behenoyl-sphingadienine (d18:2/22:0) levels	2	183660310	0.0155359	7.28895e-06	8232	TRUE	reported	textfile	2	TRUE
rs76357200	C	A	C	A	0.238586	0.0787	0.0220714	0.03535	FALSE	FALSE	FALSE	finn-b-M13_FIBROMYALGIA	14	49145373	0.1448	NA	0.5866	Fibromyalgia	Fibromyalgia	Fibromyalgia || ||	TRUE	igd	NA	NA	NA	NA	NA	NA	NA	GCST90200105	Glycosyl-N-behenoyl-sphingadienine (d18:2/22:0) levels	14	48676170	0.0516857	3.9103e-06	8232	TRUE	reported	textfile	2	TRUE
rs76560367	G	T	G	T	-0.260923	0.0834	0.0195255	0.03017	FALSE	FALSE	FALSE	finn-b-M13_FIBROMYALGIA	6	27638744	0.153	NA	0.5857	Fibromyalgia	Fibromyalgia	Fibromyalgia || ||	TRUE	igd	NA	NA	NA	NA	NA	NA	NA	GCST90200105	Glycosyl-N-behenoyl-sphingadienine (d18:2/22:0) levels	6	27670965	0.0549368	2.03917e-06	8232	TRUE	reported	textfile	2	TRUE
rs7657342	T	C	T	C	0.0751754	-0.0168	0.691694	0.6741	FALSE	FALSE	FALSE	finn-b-M13_FIBROMYALGIA	4	25630015	0.0565	NA	0.766399	Fibromyalgia	Fibromyalgia	Fibromyalgia || ||	TRUE	igd	NA	NA	NA	NA	NA	NA	NA	GCST90200105	Glycosyl-N-behenoyl-sphingadienine (d18:2/22:0) levels	4	25628393	0.0168021	7.67054e-06	8232	TRUE	reported	textfile	2	TRUE
rs7953249	A	G	A	G	0.0706765	0.0811	0.589212	0.5231	FALSE	FALSE	FALSE	finn-b-M13_FIBROMYALGIA	12	121403724	0.0533	NA	0.1283	Fibromyalgia	Fibromyalgia	Fibromyalgia || ||	TRUE	igd	NA	NA	NA	NA	NA	NA	NA	GCST90200105	Glycosyl-N-behenoyl-sphingadienine (d18:2/22:0) levels	12	120965921	0.0154152	4.54321e-06	8232	TRUE	reported	textfile	2	TRUE
rs8037196	G	A	G	A	0.0746057	0.0918	0.706535	0.7019	FALSE	FALSE	FALSE	finn-b-M13_FIBROMYALGIA	15	53236602	0.058	NA	0.1136	Fibromyalgia	Fibromyalgia	Fibromyalgia || ||	TRUE	igd	NA	NA	NA	NA	NA	NA	NA	GCST90200105	Glycosyl-N-behenoyl-sphingadienine (d18:2/22:0) levels	15	52944405	0.0166957	7.87435e-06	8232	TRUE	reported	textfile	2	TRUE
rs9311038	T	A	T	A	-0.0878475	-0.0296	0.213823	0.227	FALSE	TRUE	FALSE	finn-b-M13_FIBROMYALGIA	3	33965915	0.0637	NA	0.641501	Fibromyalgia	Fibromyalgia	Fibromyalgia || ||	TRUE	igd	NA	NA	NA	NA	NA	NA	NA	GCST90200105	Glycosyl-N-behenoyl-sphingadienine (d18:2/22:0) levels	3	33924423	0.0184967	2.04063e-06	8232	TRUE	reported	textfile	2	TRUE
rs10007799	A	G	A	G	-0.159871	-0.0772	0.0499193	0.06721	FALSE	FALSE	FALSE	finn-b-M13_FIBROMYALGIA	4	32446724	0.1063	NA	0.467599	Fibromyalgia	Fibromyalgia	Fibromyalgia || ||	TRUE	igd	NA	NA	NA	NA	NA	NA	NA	GCST90199918	Carboxyethyl-gaba levels	4	32445102	0.0352124	5.62026e-06	8090	TRUE	reported	textfile	2	TRUE
rs10226985	C	T	C	T	0.176859	-0.0317	0.0479719	0.05482	FALSE	FALSE	FALSE	finn-b-M13_FIBROMYALGIA	7	30541841	0.1154	NA	0.7835	Fibromyalgia	Fibromyalgia	Fibromyalgia || ||	TRUE	igd	NA	NA	NA	NA	NA	NA	NA	GCST90199918	Carboxyethyl-gaba levels	7	30502225	0.0363456	1.13868e-06	8090	TRUE	reported	textfile	2	TRUE
rs112733535	T	C	T	C	0.381216	-0.2328	0.00847562	0.0132	FALSE	FALSE	FALSE	finn-b-M13_FIBROMYALGIA	16	58184490	0.2327	NA	0.3172	Fibromyalgia	Fibromyalgia	Fibromyalgia || ||	TRUE	igd	NA	NA	NA	NA	NA	NA	NA	GCST90199918	Carboxyethyl-gaba levels	16	58150586	0.0837424	5.30759e-06	8090	TRUE	reported	textfile	2	TRUE
rs1165152	G	A	G	A	-0.137002	-0.0638	0.554937	0.6274	FALSE	FALSE	FALSE	finn-b-M13_FIBROMYALGIA	6	25818766	0.055	NA	0.2454	Fibromyalgia	Fibromyalgia	Fibromyalgia || ||	TRUE	igd	NA	NA	NA	NA	NA	NA	NA	GCST90199918	Carboxyethyl-gaba levels	6	25818538	0.0153637	4.7803e-19	8090	TRUE	reported	textfile	2	TRUE
rs118073108	C	G	C	G	-0.438972	-0.1172	0.00693584	0.02824	FALSE	TRUE	FALSE	finn-b-M13_FIBROMYALGIA	7	74032575	0.1599	NA	0.4636	Fibromyalgia	Fibromyalgia	Fibromyalgia || ||	TRUE	igd	NA	NA	NA	NA	NA	NA	NA	GCST90199918	Carboxyethyl-gaba levels	7	74618256	0.0924632	2.05912e-06	8090	TRUE	reported	textfile	2	TRUE
rs1213850	C	T	C	T	-0.0823861	-0.0271	0.643789	0.6342	FALSE	FALSE	FALSE	finn-b-M13_FIBROMYALGIA	1	119202269	0.055	NA	0.621901	Fibromyalgia	Fibromyalgia	Fibromyalgia || ||	TRUE	igd	NA	NA	NA	NA	NA	NA	NA	GCST90199918	Carboxyethyl-gaba levels	1	118659646	0.0159727	2.49689e-07	8090	TRUE	reported	textfile	2	TRUE
rs13435198	G	A	G	A	-0.070316	-0.0214	0.377507	0.3833	FALSE	FALSE	FALSE	finn-b-M13_FIBROMYALGIA	4	155802606	0.0546	NA	0.6947	Fibromyalgia	Fibromyalgia	Fibromyalgia || ||	TRUE	igd	NA	NA	NA	NA	NA	NA	NA	GCST90199918	Carboxyethyl-gaba levels	4	154881454	0.0158751	9.45275e-06	8090	TRUE	reported	textfile	2	TRUE
rs13438347	A	C	A	C	0.115088	-0.0181	0.104751	0.13	FALSE	FALSE	FALSE	finn-b-M13_FIBROMYALGIA	7	52784785	0.0791	NA	0.8193	Fibromyalgia	Fibromyalgia	Fibromyalgia || ||	TRUE	igd	NA	NA	NA	NA	NA	NA	NA	GCST90199918	Carboxyethyl-gaba levels	7	52717091	0.0251837	4.87846e-06	8090	TRUE	reported	textfile	2	TRUE
rs17721101	C	A	C	A	-0.131607	0.0792	0.0777241	0.04859	FALSE	FALSE	FALSE	finn-b-M13_FIBROMYALGIA	12	48228821	0.1248	NA	0.5255	Fibromyalgia	Fibromyalgia	Fibromyalgia || ||	TRUE	igd	NA	NA	NA	NA	NA	NA	NA	GCST90199918	Carboxyethyl-gaba levels	12	47835038	0.02852	3.93909e-06	8090	TRUE	reported	textfile	2	TRUE
rs2404849	G	T	G	T	-0.104966	0.0678	0.87087	0.915	FALSE	FALSE	FALSE	finn-b-M13_FIBROMYALGIA	1	224272792	0.0976	NA	0.4872	Fibromyalgia	Fibromyalgia	Fibromyalgia || ||	TRUE	igd	NA	NA	NA	NA	NA	NA	NA	GCST90199918	Carboxyethyl-gaba levels	1	224085090	0.0237378	9.78378e-06	8090	TRUE	reported	textfile	2	TRUE
rs35192662	C	G	C	G	-0.116646	0.0143	0.0968522	0.1061	FALSE	TRUE	FALSE	finn-b-M13_FIBROMYALGIA	12	89755116	0.0865	NA	0.8689	Fibromyalgia	Fibromyalgia	Fibromyalgia || ||	TRUE	igd	NA	NA	NA	NA	NA	NA	NA	GCST90199918	Carboxyethyl-gaba levels	12	89361339	0.0257699	5.99859e-06	8090	TRUE	reported	textfile	2	TRUE
rs3744683	C	T	C	T	0.317992	-0.3832	0.0115213	0.009426	FALSE	FALSE	FALSE	finn-b-M13_FIBROMYALGIA	17	3513462	0.2773	NA	0.167	Fibromyalgia	Fibromyalgia	Fibromyalgia || ||	TRUE	igd	NA	NA	NA	NA	NA	NA	NA	GCST90199918	Carboxyethyl-gaba levels	17	3610168	0.0717051	9.21955e-06	8090	TRUE	reported	textfile	2	TRUE
rs62492368	A	G	A	G	0.146094	-0.0558	0.304096	0.34	FALSE	FALSE	FALSE	finn-b-M13_FIBROMYALGIA	7	150537635	0.0561	NA	0.3191	Fibromyalgia	Fibromyalgia	Fibromyalgia || ||	TRUE	igd	NA	NA	NA	NA	NA	NA	NA	GCST90199918	Carboxyethyl-gaba levels	7	150840547	0.0167314	2.50774e-18	8090	TRUE	reported	textfile	2	TRUE
rs6416742	T	C	T	C	-0.0719088	0.0189	0.348745	0.2947	FALSE	FALSE	FALSE	finn-b-M13_FIBROMYALGIA	16	72149061	0.0585	NA	0.7471	Fibromyalgia	Fibromyalgia	Fibromyalgia || ||	TRUE	igd	NA	NA	NA	NA	NA	NA	NA	GCST90199918	Carboxyethyl-gaba levels	16	72115162	0.0159954	6.93739e-06	8090	TRUE	reported	textfile	2	TRUE
rs73177136	G	A	G	A	-0.261052	0.0032	0.0184429	0.06432	FALSE	FALSE	FALSE	finn-b-M13_FIBROMYALGIA	13	40215134	0.1075	NA	0.976	Fibromyalgia	Fibromyalgia	Fibromyalgia || ||	TRUE	igd	NA	NA	NA	NA	NA	NA	NA	GCST90199918	Carboxyethyl-gaba levels	13	39640997	0.056199	3.39849e-06	8090	TRUE	reported	textfile	2	TRUE
rs75128317	A	T	A	T	0.287952	0.0998	0.0162269	0.009742	FALSE	TRUE	FALSE	finn-b-M13_FIBROMYALGIA	3	18100832	0.273	NA	0.7147	Fibromyalgia	Fibromyalgia	Fibromyalgia || ||	TRUE	igd	NA	NA	NA	NA	NA	NA	NA	GCST90199918	Carboxyethyl-gaba levels	3	18059340	0.0607931	2.1735e-06	8090	TRUE	reported	textfile	2	TRUE
rs75761281	G	A	G	A	-1.085	0.109	0.000989732	0.02818	FALSE	FALSE	FALSE	finn-b-M13_FIBROMYALGIA	17	69699242	0.1592	NA	0.4934	Fibromyalgia	Fibromyalgia	Fibromyalgia || ||	TRUE	igd	NA	NA	NA	NA	NA	NA	NA	GCST90199918	Carboxyethyl-gaba levels	17	71703101	0.243212	8.15308e-06	8090	TRUE	reported	textfile	2	TRUE
rs76212379	T	C	T	C	0.227041	0.0517	0.0233245	0.02078	FALSE	FALSE	FALSE	finn-b-M13_FIBROMYALGIA	7	138499898	0.1884	NA	0.7837	Fibromyalgia	Fibromyalgia	Fibromyalgia || ||	TRUE	igd	NA	NA	NA	NA	NA	NA	NA	GCST90199918	Carboxyethyl-gaba levels	7	138815153	0.0511034	8.88053e-06	8090	TRUE	reported	textfile	2	TRUE
rs77897163	C	A	C	A	-0.230682	0.0289	0.022595	0.01414	FALSE	FALSE	FALSE	finn-b-M13_FIBROMYALGIA	18	13450741	0.2268	NA	0.8985	Fibromyalgia	Fibromyalgia	Fibromyalgia || ||	TRUE	igd	NA	NA	NA	NA	NA	NA	NA	GCST90199918	Carboxyethyl-gaba levels	18	13450742	0.0516181	7.85825e-06	8090	TRUE	reported	textfile	2	TRUE
rs78022645	T	C	T	C	-0.175046	0.0988	0.0478374	0.04685	FALSE	FALSE	FALSE	finn-b-M13_FIBROMYALGIA	11	94774806	0.1273	NA	0.438	Fibromyalgia	Fibromyalgia	Fibromyalgia || ||	TRUE	igd	NA	NA	NA	NA	NA	NA	NA	GCST90199918	Carboxyethyl-gaba levels	11	95041642	0.0361585	1.29135e-06	8090	TRUE	reported	textfile	2	TRUE
rs1000821	T	C	T	C	0.0955501	-0.0034	0.460226	0.4651	FALSE	FALSE	FALSE	finn-b-M13_FIBROMYALGIA	17	74434003	0.0531	NA	0.9482	Fibromyalgia	Fibromyalgia	Fibromyalgia || ||	TRUE	igd	NA	NA	NA	NA	NA	NA	NA	GCST90199657	Sphingosine 1-phosphate levels	17	76437921	0.0152708	3.92298e-10	8246	TRUE	reported	textfile	2	TRUE
rs10502344	G	A	G	A	0.190151	-0.0901	0.0362631	0.02329	FALSE	FALSE	FALSE	finn-b-M13_FIBROMYALGIA	18	6107709	0.1787	NA	0.613999	Fibromyalgia	Fibromyalgia	Fibromyalgia || ||	TRUE	igd	NA	NA	NA	NA	NA	NA	NA	GCST90199657	Sphingosine 1-phosphate levels	18	6107710	0.0413987	4.36607e-06	8246	TRUE	reported	textfile	2	TRUE
rs10744901	C	T	C	T	-0.0733906	-0.0391	0.317054	0.3682	FALSE	FALSE	FALSE	finn-b-M13_FIBROMYALGIA	12	118145683	0.055	NA	0.477	Fibromyalgia	Fibromyalgia	Fibromyalgia || ||	TRUE	igd	NA	NA	NA	NA	NA	NA	NA	GCST90199657	Sphingosine 1-phosphate levels	12	117707878	0.0164198	7.83555e-06	8246	TRUE	reported	textfile	2	TRUE
rs10960927	C	T	C	T	0.157515	0.109	0.0494112	0.04918	FALSE	FALSE	FALSE	finn-b-M13_FIBROMYALGIA	9	13072341	0.1243	NA	0.3805	Fibromyalgia	Fibromyalgia	Fibromyalgia || ||	TRUE	igd	NA	NA	NA	NA	NA	NA	NA	GCST90199657	Sphingosine 1-phosphate levels	9	13072342	0.0353441	8.32674e-06	8246	TRUE	reported	textfile	2	TRUE
rs115939317	T	C	T	C	0.27762	-0.0646	0.0153631	0.013	FALSE	FALSE	FALSE	finn-b-M13_FIBROMYALGIA	4	114651674	0.2452	NA	0.792301	Fibromyalgia	Fibromyalgia	Fibromyalgia || ||	TRUE	igd	NA	NA	NA	NA	NA	NA	NA	GCST90199657	Sphingosine 1-phosphate levels	4	113730518	0.0620996	7.80146e-06	8246	TRUE	reported	textfile	2	TRUE
rs11986857	G	C	G	C	0.147791	-0.0298	0.0606116	0.1047	FALSE	TRUE	FALSE	finn-b-M13_FIBROMYALGIA	8	21040058	0.0868	NA	0.7311	Fibromyalgia	Fibromyalgia	Fibromyalgia || ||	TRUE	igd	NA	NA	NA	NA	NA	NA	NA	GCST90199657	Sphingosine 1-phosphate levels	8	21182547	0.0320867	4.10483e-06	8246	TRUE	reported	textfile	2	TRUE
rs138132596	G	A	G	A	0.513535	-0.0216	0.00497814	0.04007	FALSE	FALSE	FALSE	finn-b-M13_FIBROMYALGIA	5	129644806	0.1356	NA	0.8733	Fibromyalgia	Fibromyalgia	Fibromyalgia || ||	TRUE	igd	NA	NA	NA	NA	NA	NA	NA	GCST90199657	Sphingosine 1-phosphate levels	5	130309113	0.109227	2.58227e-06	8246	TRUE	reported	textfile	2	TRUE
rs140079282	A	C	A	C	-0.261606	0.0562	0.0184262	0.02451	FALSE	FALSE	FALSE	finn-b-M13_FIBROMYALGIA	3	99180942	0.1728	NA	0.7449	Fibromyalgia	Fibromyalgia	Fibromyalgia || ||	TRUE	igd	TRUE	rs140079282	rs138417055	A	C	C	T	GCST90199657	Sphingosine 1-phosphate levels	3	99447594	0.056463	3.60008e-06	8246	TRUE	reported	textfile	2	TRUE
rs141116536	C	T	C	T	0.229382	-0.1474	0.0266543	0.007918	FALSE	FALSE	FALSE	finn-b-M13_FIBROMYALGIA	6	1333169	0.3083	NA	0.6327	Fibromyalgia	Fibromyalgia	Fibromyalgia || ||	TRUE	igd	NA	NA	NA	NA	NA	NA	NA	GCST90199657	Sphingosine 1-phosphate levels	6	1332934	0.0484838	2.233e-06	8246	TRUE	reported	textfile	2	TRUE
rs1456759	T	C	T	C	-0.0816351	-0.1712	0.737365	0.827	FALSE	FALSE	FALSE	finn-b-M13_FIBROMYALGIA	4	31549421	0.0698	NA	0.0141198	Fibromyalgia	Fibromyalgia	Fibromyalgia || ||	TRUE	igd	NA	NA	NA	NA	NA	NA	NA	GCST90199657	Sphingosine 1-phosphate levels	4	31547799	0.0173502	2.53695e-06	8246	TRUE	reported	textfile	2	TRUE
rs1488103	A	G	A	G	-0.0723142	0.0644	0.393833	0.3307	FALSE	FALSE	FALSE	finn-b-M13_FIBROMYALGIA	3	168925594	0.0564	NA	0.2535	Fibromyalgia	Fibromyalgia	Fibromyalgia || ||	TRUE	igd	NA	NA	NA	NA	NA	NA	NA	GCST90199657	Sphingosine 1-phosphate levels	3	169207806	0.015939	5.70756e-06	8246	TRUE	reported	textfile	2	TRUE
rs41397245	A	G	A	G	-0.0776802	-0.0082	0.378124	0.3941	FALSE	FALSE	FALSE	finn-b-M13_FIBROMYALGIA	5	77170663	0.0542	NA	0.8798	Fibromyalgia	Fibromyalgia	Fibromyalgia || ||	TRUE	igd	NA	NA	NA	NA	NA	NA	NA	GCST90199657	Sphingosine 1-phosphate levels	5	77874839	0.0161082	1.41834e-06	8246	TRUE	reported	textfile	2	TRUE
rs6493965	G	A	G	A	-0.0718094	-0.0058	0.644609	0.5589	FALSE	FALSE	FALSE	finn-b-M13_FIBROMYALGIA	15	58186161	0.0534	NA	0.9141	Fibromyalgia	Fibromyalgia	Fibromyalgia || ||	TRUE	igd	NA	NA	NA	NA	NA	NA	NA	GCST90199657	Sphingosine 1-phosphate levels	15	57893963	0.0160027	7.21237e-06	8246	TRUE	reported	textfile	2	TRUE
rs71588370	G	A	G	A	0.184415	0.0884	0.0394801	0.04411	FALSE	FALSE	FALSE	finn-b-M13_FIBROMYALGIA	5	104157179	0.1288	NA	0.4923	Fibromyalgia	Fibromyalgia	Fibromyalgia || ||	TRUE	igd	NA	NA	NA	NA	NA	NA	NA	GCST90199657	Sphingosine 1-phosphate levels	5	104821478	0.0392364	2.60043e-06	8246	TRUE	reported	textfile	2	TRUE
rs7200047	A	G	A	G	0.0725737	0.0654	0.49245	0.5553	FALSE	FALSE	FALSE	finn-b-M13_FIBROMYALGIA	16	83151469	0.0536	NA	0.2219	Fibromyalgia	Fibromyalgia	Fibromyalgia || ||	TRUE	igd	NA	NA	NA	NA	NA	NA	NA	GCST90199657	Sphingosine 1-phosphate levels	16	83117864	0.0157374	3.99671e-06	8246	TRUE	reported	textfile	2	TRUE
rs9360664	A	G	A	G	-0.0936889	0.0856	0.1805	0.1751	FALSE	FALSE	FALSE	finn-b-M13_FIBROMYALGIA	6	74041424	0.0697	NA	0.2196	Fibromyalgia	Fibromyalgia	Fibromyalgia || ||	TRUE	igd	NA	NA	NA	NA	NA	NA	NA	GCST90199657	Sphingosine 1-phosphate levels	6	73331701	0.0200697	3.03896e-06	8246	TRUE	reported	textfile	2	TRUE
rs10008293	A	T	A	T	0.0672962	-0.0215	0.389489	0.3978	FALSE	TRUE	FALSE	finn-b-M13_FIBROMYALGIA	4	32351702	0.0543	NA	0.692201	Fibromyalgia	Fibromyalgia	Fibromyalgia || ||	TRUE	igd	NA	NA	NA	NA	NA	NA	NA	GCST90200931	Glycerol to sulfate ratio	4	32350080	0.0150418	7.67899e-06	8176	TRUE	reported	textfile	2	TRUE
rs10272463	G	C	G	C	0.0679244	-0.0916	0.354964	0.3213	FALSE	TRUE	FALSE	finn-b-M13_FIBROMYALGIA	7	82428904	0.0567	NA	0.1064	Fibromyalgia	Fibromyalgia	Fibromyalgia || ||	TRUE	igd	NA	NA	NA	NA	NA	NA	NA	GCST90200931	Glycerol to sulfate ratio	7	82799588	0.0145598	3.08292e-06	8176	TRUE	reported	textfile	2	TRUE
rs10960835	T	C	T	C	0.0629963	0.074	0.490523	0.6049	FALSE	FALSE	FALSE	finn-b-M13_FIBROMYALGIA	9	12917730	0.0541	NA	0.171	Fibromyalgia	Fibromyalgia	Fibromyalgia || ||	TRUE	igd	NA	NA	NA	NA	NA	NA	NA	GCST90200931	Glycerol to sulfate ratio	9	12917731	0.014204	9.20237e-06	8176	TRUE	reported	textfile	2	TRUE
rs11176065	T	C	T	C	-0.0695849	0.0727	0.349505	0.3529	FALSE	FALSE	FALSE	finn-b-M13_FIBROMYALGIA	12	66551898	0.0553	NA	0.1884	Fibromyalgia	Fibromyalgia	Fibromyalgia || ||	TRUE	igd	NA	NA	NA	NA	NA	NA	NA	GCST90200931	Glycerol to sulfate ratio	12	66158118	0.0146488	2.03196e-06	8176	TRUE	reported	textfile	2	TRUE
rs112873937	A	G	A	G	0.147286	0.0965	0.0488346	0.05815	FALSE	FALSE	FALSE	finn-b-M13_FIBROMYALGIA	8	18315905	0.113	NA	0.3932	Fibromyalgia	Fibromyalgia	Fibromyalgia || ||	TRUE	igd	NA	NA	NA	NA	NA	NA	NA	GCST90200931	Glycerol to sulfate ratio	8	18458395	0.0326234	6.33915e-06	8176	TRUE	reported	textfile	2	TRUE
rs114273476	A	C	A	C	0.401454	0.0564	0.00656764	0.02141	FALSE	FALSE	FALSE	finn-b-M13_FIBROMYALGIA	19	17216296	0.184	NA	0.7592	Fibromyalgia	Fibromyalgia	Fibromyalgia || ||	TRUE	igd	NA	NA	NA	NA	NA	NA	NA	GCST90200931	Glycerol to sulfate ratio	19	17105486	0.0869764	3.91841e-06	8176	TRUE	reported	textfile	2	TRUE
rs114376408	A	G	A	G	-0.111935	0.0055	0.0838323	0.08784	FALSE	FALSE	FALSE	finn-b-M13_FIBROMYALGIA	5	16576873	0.0948	NA	0.9539	Fibromyalgia	Fibromyalgia	Fibromyalgia || ||	TRUE	igd	NA	NA	NA	NA	NA	NA	NA	GCST90200931	Glycerol to sulfate ratio	5	16576764	0.0253364	9.96383e-06	8176	TRUE	reported	textfile	2	TRUE
rs116874771	A	C	A	C	0.187001	-0.0707	0.029737	0.03826	FALSE	FALSE	FALSE	finn-b-M13_FIBROMYALGIA	10	84935738	0.1377	NA	0.6076	Fibromyalgia	Fibromyalgia	Fibromyalgia || ||	TRUE	igd	NA	NA	NA	NA	NA	NA	NA	GCST90200931	Glycerol to sulfate ratio	10	83175982	0.0412626	5.84345e-06	8176	TRUE	reported	textfile	2	TRUE
rs118041812	G	A	G	A	0.308188	-0.5537	0.0123616	0.006151	FALSE	FALSE	FALSE	finn-b-M13_FIBROMYALGIA	8	76274823	0.3503	NA	0.114	Fibromyalgia	Fibromyalgia	Fibromyalgia || ||	TRUE	igd	NA	NA	NA	NA	NA	NA	NA	GCST90200931	Glycerol to sulfate ratio	8	75362588	0.0635033	1.2155e-06	8176	TRUE	reported	textfile	2	TRUE
rs139079920	A	G	A	G	-0.250257	-0.0172	0.016097	0.03043	FALSE	FALSE	FALSE	finn-b-M13_FIBROMYALGIA	4	141611141	0.1598	NA	0.9141	Fibromyalgia	Fibromyalgia	Fibromyalgia || ||	TRUE	igd	NA	NA	NA	NA	NA	NA	NA	GCST90200931	Glycerol to sulfate ratio	4	140689987	0.0562331	8.57317e-06	8176	TRUE	reported	textfile	2	TRUE
rs1632215	A	G	A	G	-0.0700727	0.0054	0.658984	0.5592	FALSE	FALSE	FALSE	finn-b-M13_FIBROMYALGIA	13	27311246	0.0535	NA	0.9201	Fibromyalgia	Fibromyalgia	Fibromyalgia || ||	TRUE	igd	NA	NA	NA	NA	NA	NA	NA	GCST90200931	Glycerol to sulfate ratio	13	26737109	0.0151983	4.01577e-06	8176	TRUE	reported	textfile	2	TRUE
rs2306885	C	A	C	A	-0.115653	-0.1242	0.0983948	0.09199	FALSE	FALSE	FALSE	finn-b-M13_FIBROMYALGIA	12	95656522	0.0918	NA	0.1759	Fibromyalgia	Fibromyalgia	Fibromyalgia || ||	TRUE	igd	NA	NA	NA	NA	NA	NA	NA	GCST90200931	Glycerol to sulfate ratio	12	95262746	0.0235655	9.21306e-07	8176	TRUE	reported	textfile	2	TRUE
rs282729	C	A	C	A	0.079684	0.0174	0.234286	0.2557	FALSE	FALSE	FALSE	finn-b-M13_FIBROMYALGIA	4	59481067	0.0609	NA	0.774801	Fibromyalgia	Fibromyalgia	Fibromyalgia || ||	TRUE	igd	NA	NA	NA	NA	NA	NA	NA	GCST90200931	Glycerol to sulfate ratio	4	58614902	0.0163632	1.11768e-06	8176	TRUE	reported	textfile	2	TRUE
rs2846070	A	C	A	C	-0.100858	-0.023	0.111869	0.08534	FALSE	FALSE	FALSE	finn-b-M13_FIBROMYALGIA	11	76004761	0.0956	NA	0.8101	Fibromyalgia	Fibromyalgia	Fibromyalgia || ||	TRUE	igd	NA	NA	NA	NA	NA	NA	NA	GCST90200931	Glycerol to sulfate ratio	11	76293717	0.0222178	5.63808e-06	8176	TRUE	reported	textfile	2	TRUE
rs34437475	A	G	A	G	0.0785341	0.0622	0.2	0.2115	FALSE	FALSE	FALSE	finn-b-M13_FIBROMYALGIA	21	28274812	0.0655	NA	0.3423	Fibromyalgia	Fibromyalgia	Fibromyalgia || ||	TRUE	igd	NA	NA	NA	NA	NA	NA	NA	GCST90200931	Glycerol to sulfate ratio	21	26902493	0.017477	7.00363e-06	8176	TRUE	reported	textfile	2	TRUE
rs35408848	A	G	A	G	0.0881991	0.0275	0.166687	0.2289	FALSE	FALSE	FALSE	finn-b-M13_FIBROMYALGIA	8	9809042	0.069	NA	0.6901	Fibromyalgia	Fibromyalgia	Fibromyalgia || ||	TRUE	igd	NA	NA	NA	NA	NA	NA	NA	GCST90200931	Glycerol to sulfate ratio	8	9951532	0.0189635	3.30328e-06	8176	TRUE	reported	textfile	2	TRUE
rs55928195	C	G	C	G	-0.325888	0.1609	0.00907307	0.04465	FALSE	TRUE	FALSE	finn-b-M13_FIBROMYALGIA	9	134270726	0.1267	NA	0.2042	Fibromyalgia	Fibromyalgia	Fibromyalgia || ||	TRUE	igd	NA	NA	NA	NA	NA	NA	NA	GCST90200931	Glycerol to sulfate ratio	9	131395339	0.0736454	9.63974e-06	8176	TRUE	reported	textfile	2	TRUE
rs56040563	T	C	T	C	0.111538	0.0059	0.107815	0.08018	FALSE	FALSE	FALSE	finn-b-M13_FIBROMYALGIA	3	132702923	0.0987	NA	0.9521	Fibromyalgia	Fibromyalgia	Fibromyalgia || ||	TRUE	igd	NA	NA	NA	NA	NA	NA	NA	GCST90200931	Glycerol to sulfate ratio	3	132984079	0.0229083	1.12226e-06	8176	TRUE	reported	textfile	2	TRUE
rs61942622	G	T	G	T	-0.116684	-0.1359	0.0823025	0.07619	FALSE	FALSE	FALSE	finn-b-M13_FIBROMYALGIA	12	111010642	0.0994	NA	0.1716	Fibromyalgia	Fibromyalgia	Fibromyalgia || ||	TRUE	igd	NA	NA	NA	NA	NA	NA	NA	GCST90200931	Glycerol to sulfate ratio	12	110572837	0.0254146	4.40667e-06	8176	TRUE	reported	textfile	2	TRUE
rs62018653	C	T	C	T	0.138383	-0.0792	0.0578766	0.07442	FALSE	FALSE	FALSE	finn-b-M13_FIBROMYALGIA	15	95512519	0.1007	NA	0.4313	Fibromyalgia	Fibromyalgia	Fibromyalgia || ||	TRUE	igd	NA	NA	NA	NA	NA	NA	NA	GCST90200931	Glycerol to sulfate ratio	15	94969290	0.0300104	4.00374e-06	8176	TRUE	reported	textfile	2	TRUE
rs6790404	T	G	T	G	0.20007	-0.1665	0.0250308	0.009787	FALSE	FALSE	FALSE	finn-b-M13_FIBROMYALGIA	3	172366647	0.2795	NA	0.5513	Fibromyalgia	Fibromyalgia	Fibromyalgia || ||	TRUE	igd	NA	NA	NA	NA	NA	NA	NA	GCST90200931	Glycerol to sulfate ratio	3	172648857	0.0445981	7.25467e-06	8176	TRUE	reported	textfile	2	TRUE
rs7241147	C	G	C	G	-0.145593	-0.0728	0.931995	0.9128	FALSE	TRUE	FALSE	finn-b-M13_FIBROMYALGIA	18	59299665	0.0935	NA	0.436	Fibromyalgia	Fibromyalgia	Fibromyalgia || ||	TRUE	igd	NA	NA	NA	NA	NA	NA	NA	GCST90200931	Glycerol to sulfate ratio	18	61632432	0.0286406	3.70611e-07	8176	TRUE	reported	textfile	2	TRUE
rs7662677	G	A	G	A	0.0627138	-0.0524	0.555888	0.5546	FALSE	FALSE	FALSE	finn-b-M13_FIBROMYALGIA	4	182565693	0.0533	NA	0.3255	Fibromyalgia	Fibromyalgia	Fibromyalgia || ||	TRUE	igd	NA	NA	NA	NA	NA	NA	NA	GCST90200931	Glycerol to sulfate ratio	4	181644540	0.014098	8.65056e-06	8176	TRUE	reported	textfile	2	TRUE
rs79800012	C	T	C	T	-0.41763	-0.4592	0.00593853	0.01839	FALSE	FALSE	FALSE	finn-b-M13_FIBROMYALGIA	6	115239277	0.1985	NA	0.02071	Fibromyalgia	Fibromyalgia	Fibromyalgia || ||	TRUE	igd	TRUE	rs79800012	rs57787223	C	T	T	C	GCST90200931	Glycerol to sulfate ratio	6	114872536	0.0903535	3.79736e-06	8176	TRUE	reported	textfile	2	TRUE
rs10008293	A	T	A	T	0.0678932	-0.0215	0.388911	0.3978	FALSE	TRUE	FALSE	finn-b-M13_FIBROMYALGIA	4	32351702	0.0543	NA	0.692201	Fibromyalgia	Fibromyalgia	Fibromyalgia || ||	TRUE	igd	NA	NA	NA	NA	NA	NA	NA	GCST90199715	Myristoleate (14:1n5) levels	4	32350080	0.0152112	8.06852e-06	8255	TRUE	reported	textfile	2	TRUE
rs10164764	A	G	A	G	-0.173882	0.1697	0.0418385	0.02503	FALSE	FALSE	FALSE	finn-b-M13_FIBROMYALGIA	2	165462231	0.17	NA	0.3181	Fibromyalgia	Fibromyalgia	Fibromyalgia || ||	TRUE	igd	NA	NA	NA	NA	NA	NA	NA	GCST90199715	Myristoleate (14:1n5) levels	2	164605721	0.035576	1.02069e-06	8255	TRUE	reported	textfile	2	TRUE
rs113020642	C	T	C	T	-0.210761	0.0161	0.0271161	0.02353	FALSE	FALSE	FALSE	finn-b-M13_FIBROMYALGIA	4	153254772	0.1787	NA	0.9283	Fibromyalgia	Fibromyalgia	Fibromyalgia || ||	TRUE	igd	NA	NA	NA	NA	NA	NA	NA	GCST90199715	Myristoleate (14:1n5) levels	4	152333620	0.044548	2.23312e-06	8255	TRUE	reported	textfile	2	TRUE
rs113915691	A	G	A	G	-0.142685	-0.0256	0.0626686	0.1091	FALSE	FALSE	FALSE	finn-b-M13_FIBROMYALGIA	19	56759751	0.0861	NA	0.766	Fibromyalgia	Fibromyalgia	Fibromyalgia || ||	TRUE	igd	NA	NA	NA	NA	NA	NA	NA	GCST90199715	Myristoleate (14:1n5) levels	19	56248382	0.0291296	9.66861e-07	8255	TRUE	reported	textfile	2	TRUE
rs115386728	A	C	A	C	0.185923	-0.3685	0.0286234	0.01441	FALSE	FALSE	FALSE	finn-b-M13_FIBROMYALGIA	2	229488736	0.2332	NA	0.114	Fibromyalgia	Fibromyalgia	Fibromyalgia || ||	TRUE	igd	NA	NA	NA	NA	NA	NA	NA	GCST90199715	Myristoleate (14:1n5) levels	2	228624020	0.0420823	9.95861e-06	8255	TRUE	reported	textfile	2	TRUE
rs116885450	T	C	T	C	-0.155588	0.0452	0.0436344	0.01632	FALSE	FALSE	FALSE	finn-b-M13_FIBROMYALGIA	14	38057559	0.2142	NA	0.833	Fibromyalgia	Fibromyalgia	Fibromyalgia || ||	TRUE	igd	NA	NA	NA	NA	NA	NA	NA	GCST90199715	Myristoleate (14:1n5) levels	14	37588354	0.035151	9.5881e-06	8255	TRUE	reported	textfile	2	TRUE
rs12497825	T	A	T	A	-0.0737116	-0.05	0.644488	0.6988	FALSE	TRUE	FALSE	finn-b-M13_FIBROMYALGIA	3	47669547	0.0581	NA	0.39	Fibromyalgia	Fibromyalgia	Fibromyalgia || ||	TRUE	igd	NA	NA	NA	NA	NA	NA	NA	GCST90199715	Myristoleate (14:1n5) levels	3	47628057	0.0150861	1.02868e-06	8255	TRUE	reported	textfile	2	TRUE
rs1422881	T	C	T	C	-0.0701876	-0.0227	0.453304	0.4365	FALSE	FALSE	FALSE	finn-b-M13_FIBROMYALGIA	5	158865801	0.0536	NA	0.6718	Fibromyalgia	Fibromyalgia	Fibromyalgia || ||	TRUE	igd	NA	NA	NA	NA	NA	NA	NA	GCST90199715	Myristoleate (14:1n5) levels	5	159438793	0.0144292	1.14877e-06	8255	TRUE	reported	textfile	2	TRUE
rs143706129	A	G	A	G	-0.131294	-0.1089	0.0690223	0.05571	FALSE	FALSE	FALSE	finn-b-M13_FIBROMYALGIA	2	230887128	0.116	NA	0.3477	Fibromyalgia	Fibromyalgia	Fibromyalgia || ||	TRUE	igd	NA	NA	NA	NA	NA	NA	NA	GCST90199715	Myristoleate (14:1n5) levels	2	230022412	0.0278821	2.49039e-06	8255	TRUE	reported	textfile	2	TRUE
rs148890850	T	C	T	C	0.18222	-0.2238	0.0306554	0.0605	FALSE	FALSE	FALSE	finn-b-M13_FIBROMYALGIA	9	33336478	0.1118	NA	0.0452595	Fibromyalgia	Fibromyalgia	Fibromyalgia || ||	TRUE	igd	NA	NA	NA	NA	NA	NA	NA	GCST90199715	Myristoleate (14:1n5) levels	9	33336480	0.0411292	9.40481e-06	8255	TRUE	reported	textfile	2	TRUE
rs180670669	A	G	A	G	0.150671	-0.1309	0.0648114	0.05832	FALSE	FALSE	FALSE	finn-b-M13_FIBROMYALGIA	12	71163635	0.1135	NA	0.2489	Fibromyalgia	Fibromyalgia	Fibromyalgia || ||	TRUE	igd	NA	NA	NA	NA	NA	NA	NA	GCST90199715	Myristoleate (14:1n5) levels	12	70769855	0.0289097	1.87049e-07	8255	TRUE	reported	textfile	2	TRUE
rs2371397	A	G	A	G	-0.0705478	0.07	0.383953	0.3623	FALSE	FALSE	FALSE	finn-b-M13_FIBROMYALGIA	7	144101502	0.055	NA	0.2031	Fibromyalgia	Fibromyalgia	Fibromyalgia || ||	TRUE	igd	NA	NA	NA	NA	NA	NA	NA	GCST90199715	Myristoleate (14:1n5) levels	7	144404409	0.0147874	1.83486e-06	8255	TRUE	reported	textfile	2	TRUE
rs291035	A	C	A	C	0.0867177	0.0563	0.166768	0.2161	FALSE	FALSE	FALSE	finn-b-M13_FIBROMYALGIA	15	95638952	0.0643	NA	0.3813	Fibromyalgia	Fibromyalgia	Fibromyalgia || ||	TRUE	igd	NA	NA	NA	NA	NA	NA	NA	GCST90199715	Myristoleate (14:1n5) levels	15	95095723	0.0190835	5.51661e-06	8255	TRUE	reported	textfile	2	TRUE
rs4657374	T	A	T	A	0.0737841	-0.0263	0.304108	0.2722	FALSE	TRUE	FALSE	finn-b-M13_FIBROMYALGIA	1	164760618	0.06	NA	0.6607	Fibromyalgia	Fibromyalgia	Fibromyalgia || ||	TRUE	igd	NA	NA	NA	NA	NA	NA	NA	GCST90199715	Myristoleate (14:1n5) levels	1	164791381	0.0155331	2.0328e-06	8255	TRUE	reported	textfile	2	TRUE
rs603424	A	G	A	G	-0.0971173	-0.0925	0.175518	0.1171	FALSE	FALSE	FALSE	finn-b-M13_FIBROMYALGIA	10	102075479	0.0833	NA	0.267	Fibromyalgia	Fibromyalgia	Fibromyalgia || ||	TRUE	igd	NA	NA	NA	NA	NA	NA	NA	GCST90199715	Myristoleate (14:1n5) levels	10	100315722	0.0185985	1.7722e-07	8255	TRUE	reported	textfile	2	TRUE
rs621211	C	T	C	T	0.0659414	0.0137	0.408704	0.5029	FALSE	FALSE	FALSE	finn-b-M13_FIBROMYALGIA	9	29535541	0.0529	NA	0.7955	Fibromyalgia	Fibromyalgia	Fibromyalgia || ||	TRUE	igd	NA	NA	NA	NA	NA	NA	NA	GCST90199715	Myristoleate (14:1n5) levels	9	29535543	0.0144655	5.15159e-06	8255	TRUE	reported	textfile	2	TRUE
rs62316458	A	T	A	T	-0.0780658	-0.0141	0.205347	0.2362	FALSE	TRUE	FALSE	finn-b-M13_FIBROMYALGIA	4	88783571	0.0625	NA	0.8219	Fibromyalgia	Fibromyalgia	Fibromyalgia || ||	TRUE	igd	NA	NA	NA	NA	NA	NA	NA	GCST90199715	Myristoleate (14:1n5) levels	4	87862419	0.0175796	8.9669e-06	8255	TRUE	reported	textfile	2	TRUE
rs74359901	T	A	T	A	0.167804	0.1975	0.0501243	0.04705	FALSE	TRUE	FALSE	finn-b-M13_FIBROMYALGIA	4	163954974	0.1301	NA	0.129	Fibromyalgia	Fibromyalgia	Fibromyalgia || ||	TRUE	igd	NA	NA	NA	NA	NA	NA	NA	GCST90199715	Myristoleate (14:1n5) levels	4	163033822	0.0338264	7.02277e-07	8255	TRUE	reported	textfile	2	TRUE
rs78325276	C	T	C	T	-0.106697	-0.0261	0.100364	0.09683	FALSE	FALSE	FALSE	finn-b-M13_FIBROMYALGIA	6	81229876	0.0896	NA	0.7706	Fibromyalgia	Fibromyalgia	Fibromyalgia || ||	TRUE	igd	NA	NA	NA	NA	NA	NA	NA	GCST90199715	Myristoleate (14:1n5) levels	6	80520159	0.0236829	6.62972e-06	8255	TRUE	reported	textfile	2	TRUE
rs80053496	A	G	A	G	-0.219127	0.2979	0.0209142	0.01457	FALSE	FALSE	FALSE	finn-b-M13_FIBROMYALGIA	21	40573870	0.2191	NA	0.1741	Fibromyalgia	Fibromyalgia	Fibromyalgia || ||	TRUE	igd	NA	NA	NA	NA	NA	NA	NA	GCST90199715	Myristoleate (14:1n5) levels	21	39201944	0.0491706	8.33207e-06	8255	TRUE	reported	textfile	2	TRUE
rs8024577	T	C	T	C	-0.0687812	0.1052	0.655638	0.6429	FALSE	FALSE	FALSE	finn-b-M13_FIBROMYALGIA	15	52483377	0.0553	NA	0.0573205	Fibromyalgia	Fibromyalgia	Fibromyalgia || ||	TRUE	igd	NA	NA	NA	NA	NA	NA	NA	GCST90199715	Myristoleate (14:1n5) levels	15	52191180	0.0146636	2.72394e-06	8255	TRUE	reported	textfile	2	TRUE
rs10008401	C	T	C	T	0.0800086	-0.0363	0.609542	0.621	FALSE	FALSE	FALSE	finn-b-M13_FIBROMYALGIA	4	117779937	0.0548	NA	0.5073	Fibromyalgia	Fibromyalgia	Fibromyalgia || ||	TRUE	igd	NA	NA	NA	NA	NA	NA	NA	GCST90199633	Suberate (C8-DC) levels	4	116858781	0.0170477	2.68944e-06	6902	TRUE	reported	textfile	2	TRUE
rs11158833	G	A	G	A	-0.0922378	-0.0132	0.759084	0.7561	FALSE	FALSE	FALSE	finn-b-M13_FIBROMYALGIA	14	70578411	0.062	NA	0.8314	Fibromyalgia	Fibromyalgia	Fibromyalgia || ||	TRUE	igd	NA	NA	NA	NA	NA	NA	NA	GCST90199633	Suberate (C8-DC) levels	14	70111694	0.0196709	2.74475e-06	6902	TRUE	reported	textfile	2	TRUE
rs11705994	T	C	T	C	0.218723	0.28	0.0297142	0.07429	FALSE	FALSE	FALSE	finn-b-M13_FIBROMYALGIA	3	73368081	0.1017	NA	0.005873	Fibromyalgia	Fibromyalgia	Fibromyalgia || ||	TRUE	igd	NA	NA	NA	NA	NA	NA	NA	GCST90199633	Suberate (C8-DC) levels	3	73318930	0.0493421	9.30183e-06	6902	TRUE	reported	textfile	2	TRUE
rs117499033	G	A	G	A	0.30721	-0.2658	0.0142545	0.01527	FALSE	FALSE	FALSE	finn-b-M13_FIBROMYALGIA	18	42578174	0.2216	NA	0.2303	Fibromyalgia	Fibromyalgia	Fibromyalgia || ||	TRUE	igd	NA	NA	NA	NA	NA	NA	NA	GCST90199633	Suberate (C8-DC) levels	18	44998209	0.0691456	8.87382e-06	6902	TRUE	reported	textfile	2	TRUE
rs12555229	G	C	G	C	-0.0955533	-0.0141	0.250852	0.3341	FALSE	TRUE	FALSE	finn-b-M13_FIBROMYALGIA	9	138679911	0.0565	NA	0.8035	Fibromyalgia	Fibromyalgia	Fibromyalgia || ||	TRUE	igd	NA	NA	NA	NA	NA	NA	NA	GCST90199633	Suberate (C8-DC) levels	9	135788065	0.0196317	1.13142e-06	6902	TRUE	reported	textfile	2	TRUE
rs140580838	A	G	A	G	0.308493	-0.2147	0.0145645	0.02001	FALSE	FALSE	FALSE	finn-b-M13_FIBROMYALGIA	8	109989934	0.195	NA	0.2709	Fibromyalgia	Fibromyalgia	Fibromyalgia || ||	TRUE	igd	NA	NA	NA	NA	NA	NA	NA	GCST90199633	Suberate (C8-DC) levels	8	108977705	0.0695392	9.15411e-06	6902	TRUE	reported	textfile	2	TRUE
rs141183746	C	A	C	A	0.161019	0.1177	0.0572184	0.06992	FALSE	FALSE	FALSE	finn-b-M13_FIBROMYALGIA	6	164343235	0.1051	NA	0.2631	Fibromyalgia	Fibromyalgia	Fibromyalgia || ||	TRUE	igd	NA	NA	NA	NA	NA	NA	NA	GCST90199633	Suberate (C8-DC) levels	6	163922203	0.0364413	9.93437e-06	6902	TRUE	reported	textfile	2	TRUE
rs145406199	A	G	A	G	0.37263	-0.0341	0.0101441	0.007436	FALSE	FALSE	FALSE	finn-b-M13_FIBROMYALGIA	1	107803186	0.3163	NA	0.9141	Fibromyalgia	Fibromyalgia	Fibromyalgia || ||	TRUE	igd	NA	NA	NA	NA	NA	NA	NA	GCST90199633	Suberate (C8-DC) levels	1	107260564	0.0837642	8.64482e-06	6902	TRUE	reported	textfile	2	TRUE
rs146529314	G	T	G	T	0.336938	-0.439	0.0147642	0.002347	FALSE	FALSE	FALSE	finn-b-M13_FIBROMYALGIA	7	105648375	0.5797	NA	0.4489	Fibromyalgia	Fibromyalgia	Fibromyalgia || ||	TRUE	igd	NA	NA	NA	NA	NA	NA	NA	GCST90199633	Suberate (C8-DC) levels	7	106007929	0.0697181	1.34585e-06	6902	TRUE	reported	textfile	2	TRUE
rs148863405	C	G	C	G	0.798698	-0.153	0.00217928	0.03097	FALSE	TRUE	FALSE	finn-b-M13_FIBROMYALGIA	9	16581527	0.1548	NA	0.323	Fibromyalgia	Fibromyalgia	Fibromyalgia || ||	TRUE	igd	NA	NA	NA	NA	NA	NA	NA	GCST90199633	Suberate (C8-DC) levels	9	16581529	0.178207	7.40014e-06	6902	TRUE	reported	textfile	2	TRUE
rs1551619	T	C	T	C	-0.0957862	0.0086	0.230903	0.1467	FALSE	FALSE	FALSE	finn-b-M13_FIBROMYALGIA	17	73885805	0.0754	NA	0.9091	Fibromyalgia	Fibromyalgia	Fibromyalgia || ||	TRUE	igd	NA	NA	NA	NA	NA	NA	NA	GCST90199633	Suberate (C8-DC) levels	17	75889724	0.0197795	1.28083e-06	6902	TRUE	reported	textfile	2	TRUE
rs17738405	C	T	C	T	-0.193637	-0.3599	0.0453877	0.02041	FALSE	FALSE	FALSE	finn-b-M13_FIBROMYALGIA	7	3275523	0.1914	NA	0.0600206	Fibromyalgia	Fibromyalgia	Fibromyalgia || ||	TRUE	igd	NA	NA	NA	NA	NA	NA	NA	GCST90199633	Suberate (C8-DC) levels	7	3235891	0.0395206	9.60098e-07	6902	TRUE	reported	textfile	2	TRUE
rs189725310	T	C	T	C	-0.167962	-0.0371	0.0547126	0.05148	FALSE	FALSE	FALSE	finn-b-M13_FIBROMYALGIA	2	209613230	0.1195	NA	0.7563	Fibromyalgia	Fibromyalgia	Fibromyalgia || ||	TRUE	igd	NA	NA	NA	NA	NA	NA	NA	GCST90199633	Suberate (C8-DC) levels	2	208748506	0.0363969	3.9362e-06	6902	TRUE	reported	textfile	2	TRUE
rs191920017	A	G	A	G	-0.399312	-0.1051	0.00922782	0.00156	FALSE	FALSE	FALSE	finn-b-M13_FIBROMYALGIA	22	22632026	0.7083	NA	0.8821	Fibromyalgia	Fibromyalgia	Fibromyalgia || ||	TRUE	igd	NA	NA	NA	NA	NA	NA	NA	GCST90199633	Suberate (C8-DC) levels	22	22277644	0.0879247	5.58496e-06	6902	TRUE	reported	textfile	2	TRUE
rs34357043	G	T	G	T	0.266628	-0.187	0.0233082	0.0385	FALSE	FALSE	FALSE	finn-b-M13_FIBROMYALGIA	4	31927358	0.1404	NA	0.1829	Fibromyalgia	Fibromyalgia	Fibromyalgia || ||	TRUE	igd	NA	NA	NA	NA	NA	NA	NA	GCST90199633	Suberate (C8-DC) levels	4	31925736	0.0551228	1.31829e-06	6902	TRUE	reported	textfile	2	TRUE
rs35904890	T	C	T	C	-0.227287	-0.3849	0.0284364	0.01999	FALSE	FALSE	FALSE	finn-b-M13_FIBROMYALGIA	11	8670776	0.1902	NA	0.0429596	Fibromyalgia	Fibromyalgia	Fibromyalgia || ||	TRUE	igd	NA	NA	NA	NA	NA	NA	NA	GCST90199633	Suberate (C8-DC) levels	11	8649229	0.0499103	5.26594e-06	6902	TRUE	reported	textfile	2	TRUE
rs4689177	T	C	T	C	0.108829	-0.0835	0.144896	0.1444	FALSE	FALSE	FALSE	finn-b-M13_FIBROMYALGIA	4	4594474	0.075	NA	0.2652	Fibromyalgia	Fibromyalgia	Fibromyalgia || ||	TRUE	igd	NA	NA	NA	NA	NA	NA	NA	GCST90199633	Suberate (C8-DC) levels	4	4592747	0.023723	4.48615e-06	6902	TRUE	reported	textfile	2	TRUE
rs4695288	T	C	T	C	0.200323	-0.3452	0.965304	0.9827	FALSE	FALSE	FALSE	finn-b-M13_FIBROMYALGIA	4	47854773	0.2091	NA	0.0988599	Fibromyalgia	Fibromyalgia	Fibromyalgia || ||	TRUE	igd	NA	NA	NA	NA	NA	NA	NA	GCST90199633	Suberate (C8-DC) levels	4	47852756	0.0453191	9.85766e-06	6902	TRUE	reported	textfile	2	TRUE
rs539316238	T	C	T	C	-0.273918	-0.0853	0.0202821	0.03367	FALSE	FALSE	FALSE	finn-b-M13_FIBROMYALGIA	6	18011697	0.1471	NA	0.562	Fibromyalgia	Fibromyalgia	Fibromyalgia || ||	TRUE	igd	NA	NA	NA	NA	NA	NA	NA	GCST90199633	Suberate (C8-DC) levels	6	18011466	0.059083	3.54953e-06	6902	TRUE	reported	textfile	2	TRUE
rs6914551	C	T	C	T	-0.366135	-0.0679	0.011276	0.08961	FALSE	FALSE	FALSE	finn-b-M13_FIBROMYALGIA	6	107134706	0.0923	NA	0.4622	Fibromyalgia	Fibromyalgia	Fibromyalgia || ||	TRUE	igd	NA	NA	NA	NA	NA	NA	NA	GCST90199633	Suberate (C8-DC) levels	6	106686831	0.0791195	3.69883e-06	6902	TRUE	reported	textfile	2	TRUE
rs6923178	G	C	G	C	0.121756	-0.0657	0.119895	0.1704	FALSE	TRUE	FALSE	finn-b-M13_FIBROMYALGIA	6	80393740	0.071	NA	0.3542	Fibromyalgia	Fibromyalgia	Fibromyalgia || ||	TRUE	igd	NA	NA	NA	NA	NA	NA	NA	GCST90199633	Suberate (C8-DC) levels	6	79684023	0.025941	2.68478e-06	6902	TRUE	reported	textfile	2	TRUE
rs72777931	A	G	A	G	0.336072	-0.0679	0.0147465	0.03603	FALSE	FALSE	FALSE	finn-b-M13_FIBROMYALGIA	16	23868994	0.1443	NA	0.637801	Fibromyalgia	Fibromyalgia	Fibromyalgia || ||	TRUE	igd	NA	NA	NA	NA	NA	NA	NA	GCST90199633	Suberate (C8-DC) levels	16	23857673	0.0690214	1.12109e-06	6902	TRUE	reported	textfile	2	TRUE
rs7616744	A	G	A	G	-0.0876962	-0.0095	0.223816	0.3106	FALSE	FALSE	FALSE	finn-b-M13_FIBROMYALGIA	3	24781687	0.0573	NA	0.8687	Fibromyalgia	Fibromyalgia	Fibromyalgia || ||	TRUE	igd	NA	NA	NA	NA	NA	NA	NA	GCST90199633	Suberate (C8-DC) levels	3	24740196	0.0198179	9.63944e-06	6902	TRUE	reported	textfile	2	TRUE
rs78440527	G	A	G	A	0.199278	0.0544	0.0359116	0.01858	FALSE	FALSE	FALSE	finn-b-M13_FIBROMYALGIA	4	102786047	0.1984	NA	0.783901	Fibromyalgia	Fibromyalgia	Fibromyalgia || ||	TRUE	igd	NA	NA	NA	NA	NA	NA	NA	GCST90199633	Suberate (C8-DC) levels	4	101864890	0.0447114	8.31185e-06	6902	TRUE	reported	textfile	2	TRUE
rs848290	T	A	T	A	-0.165088	0.0566	0.068549	0.04565	FALSE	TRUE	FALSE	finn-b-M13_FIBROMYALGIA	2	58389182	0.1316	NA	0.6672	Fibromyalgia	Fibromyalgia	Fibromyalgia || ||	TRUE	igd	NA	NA	NA	NA	NA	NA	NA	GCST90199633	Suberate (C8-DC) levels	2	58162047	0.0330302	5.79013e-07	6902	TRUE	reported	textfile	2	TRUE
rs9313297	G	A	G	A	0.0991772	0.0821	0.172813	0.1844	FALSE	FALSE	FALSE	finn-b-M13_FIBROMYALGIA	5	165405228	0.0681	NA	0.2284	Fibromyalgia	Fibromyalgia	Fibromyalgia || ||	TRUE	igd	NA	NA	NA	NA	NA	NA	NA	GCST90199633	Suberate (C8-DC) levels	5	165978223	0.0219344	6.13931e-06	6902	TRUE	reported	textfile	2	TRUE
rs9406110	A	G	A	G	-0.0894199	-0.0169	0.229681	0.2315	FALSE	FALSE	FALSE	finn-b-M13_FIBROMYALGIA	6	8237195	0.0629	NA	0.788501	Fibromyalgia	Fibromyalgia	Fibromyalgia || ||	TRUE	igd	NA	NA	NA	NA	NA	NA	NA	GCST90199633	Suberate (C8-DC) levels	6	8236962	0.0200898	8.54658e-06	6902	TRUE	reported	textfile	2	TRUE
rs10008952	T	G	T	G	-0.0785743	-0.0198	0.296299	0.3915	FALSE	FALSE	FALSE	finn-b-M13_FIBROMYALGIA	4	114330615	0.0547	NA	0.717599	Fibromyalgia	Fibromyalgia	Fibromyalgia || ||	TRUE	igd	NA	NA	NA	NA	NA	NA	NA	GCST90200906	2'-deoxyuridine to cytidine ratio	4	113409459	0.0176208	8.22747e-06	7410	TRUE	reported	textfile	2	TRUE
rs11113828	A	C	A	C	-0.0739254	0.0312	0.369187	0.338	FALSE	FALSE	FALSE	finn-b-M13_FIBROMYALGIA	12	108738806	0.0559	NA	0.576901	Fibromyalgia	Fibromyalgia	Fibromyalgia || ||	TRUE	igd	NA	NA	NA	NA	NA	NA	NA	GCST90200906	2'-deoxyuridine to cytidine ratio	12	108345029	0.0164569	7.05326e-06	7410	TRUE	reported	textfile	2	TRUE
rs111782287	T	A	T	A	0.216098	0.278	0.0286874	0.008389	FALSE	TRUE	FALSE	finn-b-M13_FIBROMYALGIA	3	37065169	0.2976	NA	0.3502	Fibromyalgia	Fibromyalgia	Fibromyalgia || ||	TRUE	igd	NA	NA	NA	NA	NA	NA	NA	GCST90200906	2'-deoxyuridine to cytidine ratio	3	37023678	0.0476029	5.63618e-06	7410	TRUE	reported	textfile	2	TRUE
rs113355690	T	C	T	C	-0.357174	-0.4158	0.0108741	0.02935	FALSE	FALSE	FALSE	finn-b-M13_FIBROMYALGIA	16	599283	0.1636	NA	0.01102	Fibromyalgia	Fibromyalgia	Fibromyalgia || ||	TRUE	igd	NA	NA	NA	NA	NA	NA	NA	GCST90200906	2'-deoxyuridine to cytidine ratio	16	549283	0.0760301	2.62988e-06	7410	TRUE	reported	textfile	2	TRUE
rs116556966	G	T	G	T	-0.166019	-0.1446	0.0519613	0.06335	FALSE	FALSE	FALSE	finn-b-M13_FIBROMYALGIA	2	76664959	0.1095	NA	0.1867	Fibromyalgia	Fibromyalgia	Fibromyalgia || ||	TRUE	igd	NA	NA	NA	NA	NA	NA	NA	GCST90200906	2'-deoxyuridine to cytidine ratio	2	76437833	0.0358631	3.66978e-06	7410	TRUE	reported	textfile	2	TRUE
rs116906001	A	G	A	G	0.442827	0.2101	0.00656204	0.0005367	FALSE	FALSE	FALSE	finn-b-M13_FIBROMYALGIA	11	121639857	1.1471	NA	0.8547	Fibromyalgia	Fibromyalgia	Fibromyalgia || ||	TRUE	igd	NA	NA	NA	NA	NA	NA	NA	GCST90200906	2'-deoxyuridine to cytidine ratio	11	121769149	0.0974639	5.53271e-06	7410	TRUE	reported	textfile	2	TRUE
rs117823060	A	C	A	C	-0.373887	0.3008	0.0107659	0.01391	FALSE	FALSE	FALSE	finn-b-M13_FIBROMYALGIA	11	5025559	0.2264	NA	0.184	Fibromyalgia	Fibromyalgia	Fibromyalgia || ||	TRUE	igd	NA	NA	NA	NA	NA	NA	NA	GCST90200906	2'-deoxyuridine to cytidine ratio	11	5004329	0.0774768	1.39446e-06	7410	TRUE	reported	textfile	2	TRUE
rs12913954	C	T	C	T	-0.326167	-0.5245	0.0130135	0.01542	FALSE	FALSE	FALSE	finn-b-M13_FIBROMYALGIA	15	95878230	0.2237	NA	0.0190599	Fibromyalgia	Fibromyalgia	Fibromyalgia || ||	TRUE	igd	NA	NA	NA	NA	NA	NA	NA	GCST90200906	2'-deoxyuridine to cytidine ratio	15	95335001	0.0713818	4.89286e-06	7410	TRUE	reported	textfile	2	TRUE
rs131794	C	A	C	A	-0.181284	0.0289	0.779316	0.8188	FALSE	FALSE	FALSE	finn-b-M13_FIBROMYALGIA	22	50971752	0.0685	NA	0.673	Fibromyalgia	Fibromyalgia	Fibromyalgia || ||	TRUE	igd	NA	NA	NA	NA	NA	NA	NA	GCST90200906	2'-deoxyuridine to cytidine ratio	22	50533323	0.0190013	1.4198e-21	7410	TRUE	reported	textfile	2	TRUE
rs138880106	G	C	G	C	-0.294316	0.0907	0.0149162	0.05968	FALSE	TRUE	FALSE	finn-b-M13_FIBROMYALGIA	3	107071289	0.1135	NA	0.4243	Fibromyalgia	Fibromyalgia	Fibromyalgia || ||	TRUE	igd	NA	NA	NA	NA	NA	NA	NA	GCST90200906	2'-deoxyuridine to cytidine ratio	3	107352442	0.0651877	6.33474e-06	7410	TRUE	reported	textfile	2	TRUE
rs141476650	G	T	G	T	-0.322528	0.0736	0.0142799	0.007235	FALSE	FALSE	FALSE	finn-b-M13_FIBROMYALGIA	2	64472218	0.32	NA	0.818	Fibromyalgia	Fibromyalgia	Fibromyalgia || ||	TRUE	igd	NA	NA	NA	NA	NA	NA	NA	GCST90200906	2'-deoxyuridine to cytidine ratio	2	64245084	0.0669604	1.45958e-06	7410	TRUE	reported	textfile	2	TRUE
rs143134280	T	G	T	G	0.362612	-0.0564	0.00991983	0.01175	FALSE	FALSE	FALSE	finn-b-M13_FIBROMYALGIA	16	84072746	0.2424	NA	0.8161	Fibromyalgia	Fibromyalgia	Fibromyalgia || ||	TRUE	igd	NA	NA	NA	NA	NA	NA	NA	GCST90200906	2'-deoxyuridine to cytidine ratio	16	84039141	0.0805447	6.73191e-06	7410	TRUE	reported	textfile	2	TRUE
rs145761741	A	G	A	G	0.277772	-0.0353	0.0186714	0.00687	FALSE	FALSE	FALSE	finn-b-M13_FIBROMYALGIA	12	124461513	0.335	NA	0.916	Fibromyalgia	Fibromyalgia	Fibromyalgia || ||	TRUE	igd	NA	NA	NA	NA	NA	NA	NA	GCST90200906	2'-deoxyuridine to cytidine ratio	12	123976966	0.0586629	2.18998e-06	7410	TRUE	reported	textfile	2	TRUE
rs151297248	T	C	T	C	-0.278884	0.394	0.0161005	0.009281	FALSE	FALSE	FALSE	finn-b-M13_FIBROMYALGIA	10	124507079	0.2761	NA	0.1535	Fibromyalgia	Fibromyalgia	Fibromyalgia || ||	TRUE	igd	NA	NA	NA	NA	NA	NA	NA	GCST90200906	2'-deoxyuridine to cytidine ratio	10	122747563	0.0628064	8.9801e-06	7410	TRUE	reported	textfile	2	TRUE
rs16881066	G	A	G	A	0.157422	0.0421	0.0631565	0.08882	FALSE	FALSE	FALSE	finn-b-M13_FIBROMYALGIA	6	35772722	0.0923	NA	0.6486	Fibromyalgia	Fibromyalgia	Fibromyalgia || ||	TRUE	igd	NA	NA	NA	NA	NA	NA	NA	GCST90200906	2'-deoxyuridine to cytidine ratio	6	35804945	0.0326405	1.41491e-06	7410	TRUE	reported	textfile	2	TRUE
rs17600621	G	A	G	A	-0.274658	-0.1	0.0183709	0.02059	FALSE	FALSE	FALSE	finn-b-M13_FIBROMYALGIA	10	53125181	0.1889	NA	0.596401	Fibromyalgia	Fibromyalgia	Fibromyalgia || ||	TRUE	igd	NA	NA	NA	NA	NA	NA	NA	GCST90200906	2'-deoxyuridine to cytidine ratio	10	51365421	0.0592953	3.62074e-06	7410	TRUE	reported	textfile	2	TRUE
rs192597	T	C	T	C	-0.0907469	0.0537	0.206967	0.2	FALSE	FALSE	FALSE	finn-b-M13_FIBROMYALGIA	5	73372240	0.0661	NA	0.416	Fibromyalgia	Fibromyalgia	Fibromyalgia || ||	TRUE	igd	NA	NA	NA	NA	NA	NA	NA	GCST90200906	2'-deoxyuridine to cytidine ratio	5	74076415	0.019614	3.71656e-06	7410	TRUE	reported	textfile	2	TRUE
rs194883	A	T	A	T	-0.0742597	-0.1131	0.372826	0.3418	FALSE	TRUE	FALSE	finn-b-M13_FIBROMYALGIA	6	82414944	0.0559	NA	0.0429497	Fibromyalgia	Fibromyalgia	Fibromyalgia || ||	TRUE	igd	NA	NA	NA	NA	NA	NA	NA	GCST90200906	2'-deoxyuridine to cytidine ratio	6	81705227	0.016781	9.63481e-06	7410	TRUE	reported	textfile	2	TRUE
rs2654984	G	T	G	T	0.245473	0.1435	0.974136	0.9702	FALSE	FALSE	FALSE	finn-b-M13_FIBROMYALGIA	15	99571554	0.1602	NA	0.3705	Fibromyalgia	Fibromyalgia	Fibromyalgia || ||	TRUE	igd	NA	NA	NA	NA	NA	NA	NA	GCST90200906	2'-deoxyuridine to cytidine ratio	15	99028325	0.0497299	7.96928e-07	7410	TRUE	reported	textfile	2	TRUE
rs28534801	A	C	A	C	0.0776739	-0.0288	0.293273	0.2382	FALSE	FALSE	FALSE	finn-b-M13_FIBROMYALGIA	5	83326328	0.0628	NA	0.6459	Fibromyalgia	Fibromyalgia	Fibromyalgia || ||	TRUE	igd	NA	NA	NA	NA	NA	NA	NA	GCST90200906	2'-deoxyuridine to cytidine ratio	5	84030509	0.0173966	8.01094e-06	7410	TRUE	reported	textfile	2	TRUE
rs3101237	C	T	C	T	-0.331116	0.0854	0.0118451	0.1065	FALSE	FALSE	FALSE	finn-b-M13_FIBROMYALGIA	8	105967389	0.0856	NA	0.3186	Fibromyalgia	Fibromyalgia	Fibromyalgia || ||	TRUE	igd	NA	NA	NA	NA	NA	NA	NA	GCST90200906	2'-deoxyuridine to cytidine ratio	8	104955161	0.0737143	7.05941e-06	7410	TRUE	reported	textfile	2	TRUE
rs3912457	A	G	A	G	0.126923	0.1158	0.0889508	0.1012	FALSE	FALSE	FALSE	finn-b-M13_FIBROMYALGIA	9	4693707	0.0879	NA	0.1879	Fibromyalgia	Fibromyalgia	Fibromyalgia || ||	TRUE	igd	NA	NA	NA	NA	NA	NA	NA	GCST90200906	2'-deoxyuridine to cytidine ratio	9	4693707	0.0277656	4.84843e-06	7410	TRUE	reported	textfile	2	TRUE
rs56159502	A	G	A	G	0.108044	0.1292	0.134875	0.1397	FALSE	FALSE	FALSE	finn-b-M13_FIBROMYALGIA	1	161618545	0.0769	NA	0.0929394	Fibromyalgia	Fibromyalgia	Fibromyalgia || ||	TRUE	igd	NA	NA	NA	NA	NA	NA	NA	GCST90200906	2'-deoxyuridine to cytidine ratio	1	161648755	0.0230981	2.90262e-06	7410	TRUE	reported	textfile	2	TRUE
rs61921560	T	A	T	A	0.260929	0.023	0.0198964	0.008433	FALSE	TRUE	FALSE	finn-b-M13_FIBROMYALGIA	12	66068176	0.3055	NA	0.94	Fibromyalgia	Fibromyalgia	Fibromyalgia || ||	TRUE	igd	NA	NA	NA	NA	NA	NA	NA	GCST90200906	2'-deoxyuridine to cytidine ratio	12	65674396	0.057134	4.94842e-06	7410	TRUE	reported	textfile	2	TRUE
rs6823417	T	C	T	C	0.0884486	-0.0056	0.723401	0.7134	FALSE	FALSE	FALSE	finn-b-M13_FIBROMYALGIA	4	139585573	0.0585	NA	0.9239	Fibromyalgia	Fibromyalgia	Fibromyalgia || ||	TRUE	igd	NA	NA	NA	NA	NA	NA	NA	GCST90200906	2'-deoxyuridine to cytidine ratio	4	138664419	0.0182976	1.33882e-06	7410	TRUE	reported	textfile	2	TRUE
rs72754978	C	T	C	T	0.200677	-0.0675	0.0578199	0.07119	FALSE	FALSE	FALSE	finn-b-M13_FIBROMYALGIA	15	85505020	0.1029	NA	0.512	Fibromyalgia	Fibromyalgia	Fibromyalgia || ||	TRUE	igd	NA	NA	NA	NA	NA	NA	NA	GCST90200906	2'-deoxyuridine to cytidine ratio	15	84961789	0.0340059	3.60798e-09	7410	TRUE	reported	textfile	2	TRUE
rs72854220	C	T	C	T	0.0958138	-0.0118	0.174011	0.1424	FALSE	FALSE	FALSE	finn-b-M13_FIBROMYALGIA	2	126854929	0.0762	NA	0.8765	Fibromyalgia	Fibromyalgia	Fibromyalgia || ||	TRUE	igd	NA	NA	NA	NA	NA	NA	NA	GCST90200906	2'-deoxyuridine to cytidine ratio	2	126097352	0.0209036	4.57021e-06	7410	TRUE	reported	textfile	2	TRUE
rs883555	G	A	G	A	-0.123877	0.0743	0.908158	0.9323	FALSE	FALSE	FALSE	finn-b-M13_FIBROMYALGIA	1	116382318	0.1059	NA	0.483	Fibromyalgia	Fibromyalgia	Fibromyalgia || ||	TRUE	igd	NA	NA	NA	NA	NA	NA	NA	GCST90200906	2'-deoxyuridine to cytidine ratio	1	115839697	0.027098	4.84374e-06	7410	TRUE	reported	textfile	2	TRUE
rs10009978	T	C	T	C	-0.113294	0.1256	0.0994764	0.1231	FALSE	FALSE	FALSE	finn-b-M13_FIBROMYALGIA	4	137654857	0.0809	NA	0.1206	Fibromyalgia	Fibromyalgia	Fibromyalgia || ||	TRUE	igd	NA	NA	NA	NA	NA	NA	NA	GCST90200912	tryptophan to tyrosine ratio	4	136733702	0.0252828	7.42704e-06	8226	TRUE	reported	textfile	2	TRUE
rs10900054	A	C	A	C	-0.0839601	-0.0027	0.216832	0.2456	FALSE	FALSE	FALSE	finn-b-M13_FIBROMYALGIA	10	45002620	0.0615	NA	0.9652	Fibromyalgia	Fibromyalgia	Fibromyalgia || ||	TRUE	igd	NA	NA	NA	NA	NA	NA	NA	GCST90200912	tryptophan to tyrosine ratio	10	44507172	0.0183877	4.96886e-06	8226	TRUE	reported	textfile	2	TRUE
rs11120709	T	C	T	C	-0.0708252	0.031	0.476975	0.5367	FALSE	FALSE	FALSE	finn-b-M13_FIBROMYALGIA	1	216176975	0.0531	NA	0.5592	Fibromyalgia	Fibromyalgia	Fibromyalgia || ||	TRUE	igd	NA	NA	NA	NA	NA	NA	NA	GCST90200912	tryptophan to tyrosine ratio	1	216003633	0.0152387	3.35622e-06	8226	TRUE	reported	textfile	2	TRUE
rs1134464	A	C	A	C	0.0752621	0.0208	0.305956	0.3529	FALSE	FALSE	FALSE	finn-b-M13_FIBROMYALGIA	12	121407256	0.056	NA	0.7099	Fibromyalgia	Fibromyalgia	Fibromyalgia || ||	TRUE	igd	TRUE	rs1134464	rs12815613	A	C	G	A	GCST90200912	tryptophan to tyrosine ratio	12	120968771	0.0163602	4.21867e-06	8226	TRUE	reported	textfile	2	TRUE
rs113778185	C	T	C	T	0.360767	0.0371	0.00890352	0.011	FALSE	FALSE	FALSE	finn-b-M13_FIBROMYALGIA	5	509007	0.2579	NA	0.8856	Fibromyalgia	Fibromyalgia	Fibromyalgia || ||	TRUE	igd	NA	NA	NA	NA	NA	NA	NA	GCST90200912	tryptophan to tyrosine ratio	5	508892	0.0809195	8.25965e-06	8226	TRUE	reported	textfile	2	TRUE
rs1176456	C	T	C	T	-0.0729549	-0.0375	0.409666	0.4974	FALSE	FALSE	FALSE	finn-b-M13_FIBROMYALGIA	10	132490391	0.0531	NA	0.4797	Fibromyalgia	Fibromyalgia	Fibromyalgia || ||	TRUE	igd	NA	NA	NA	NA	NA	NA	NA	GCST90200912	tryptophan to tyrosine ratio	10	130692127	0.0156336	3.06302e-06	8226	TRUE	reported	textfile	2	TRUE
rs117958383	C	T	C	T	-0.252699	0.3489	0.0224507	0.01375	FALSE	FALSE	FALSE	finn-b-M13_FIBROMYALGIA	14	76097999	0.2345	NA	0.1367	Fibromyalgia	Fibromyalgia	Fibromyalgia || ||	TRUE	igd	NA	NA	NA	NA	NA	NA	NA	GCST90200912	tryptophan to tyrosine ratio	14	75631656	0.0511689	7.87163e-07	8226	TRUE	reported	textfile	2	TRUE
rs12212085	C	A	C	A	-0.120797	0.0813	0.151082	0.1002	FALSE	FALSE	FALSE	finn-b-M13_FIBROMYALGIA	6	111415836	0.0885	NA	0.3587	Fibromyalgia	Fibromyalgia	Fibromyalgia || ||	TRUE	igd	NA	NA	NA	NA	NA	NA	NA	GCST90200912	tryptophan to tyrosine ratio	6	111094633	0.0212987	1.4149e-08	8226	TRUE	reported	textfile	2	TRUE
rs139751958	A	G	A	G	0.479615	-0.0156	0.00638842	0.03013	FALSE	FALSE	FALSE	finn-b-M13_FIBROMYALGIA	4	95790644	0.1535	NA	0.919	Fibromyalgia	Fibromyalgia	Fibromyalgia || ||	TRUE	igd	NA	NA	NA	NA	NA	NA	NA	GCST90200912	tryptophan to tyrosine ratio	4	94869493	0.0951437	4.63224e-07	8226	TRUE	reported	textfile	2	TRUE
rs146254089	A	G	A	G	0.305752	-0.4422	0.0158503	0.01652	FALSE	FALSE	FALSE	finn-b-M13_FIBROMYALGIA	16	69965155	0.209	NA	0.0343503	Fibromyalgia	Fibromyalgia	Fibromyalgia || ||	TRUE	igd	NA	NA	NA	NA	NA	NA	NA	GCST90200912	tryptophan to tyrosine ratio	16	69931252	0.0611545	5.74291e-07	8226	TRUE	reported	textfile	2	TRUE
rs147388342	G	C	G	C	-0.306467	-0.0585	0.0166523	0.02492	FALSE	TRUE	FALSE	finn-b-M13_FIBROMYALGIA	4	154368573	0.17	NA	0.730801	Fibromyalgia	Fibromyalgia	Fibromyalgia || ||	TRUE	igd	NA	NA	NA	NA	NA	NA	NA	GCST90200912	tryptophan to tyrosine ratio	4	153447421	0.0593923	2.46886e-07	8226	TRUE	reported	textfile	2	TRUE
rs150851429	C	G	C	G	-0.376857	0.0818	0.0150978	0.01968	FALSE	TRUE	FALSE	finn-b-M13_FIBROMYALGIA	16	71628046	0.1885	NA	0.664401	Fibromyalgia	Fibromyalgia	Fibromyalgia || ||	TRUE	igd	TRUE	rs150851429	rs117866491	C	G	T	G	GCST90200912	tryptophan to tyrosine ratio	16	71591928	0.0617744	1.05718e-09	8226	TRUE	reported	textfile	2	TRUE
rs17838916	A	G	A	G	0.241305	-0.1713	0.0251492	0.01055	FALSE	FALSE	FALSE	finn-b-M13_FIBROMYALGIA	4	8557853	0.2588	NA	0.5081	Fibromyalgia	Fibromyalgia	Fibromyalgia || ||	TRUE	igd	NA	NA	NA	NA	NA	NA	NA	GCST90200912	tryptophan to tyrosine ratio	4	8556126	0.048915	8.09169e-07	8226	TRUE	reported	textfile	2	TRUE
rs2064508	C	T	C	T	0.262641	0.1528	0.0170945	0.03087	FALSE	FALSE	FALSE	finn-b-M13_FIBROMYALGIA	20	10848081	0.1553	NA	0.3252	Fibromyalgia	Fibromyalgia	Fibromyalgia || ||	TRUE	igd	NA	NA	NA	NA	NA	NA	NA	GCST90200912	tryptophan to tyrosine ratio	20	10867433	0.0583905	6.85913e-06	8226	TRUE	reported	textfile	2	TRUE
rs2454663	C	T	C	T	-0.106097	0.0535	0.767397	0.8053	FALSE	FALSE	FALSE	finn-b-M13_FIBROMYALGIA	11	57358083	0.0671	NA	0.4256	Fibromyalgia	Fibromyalgia	Fibromyalgia || ||	TRUE	igd	NA	NA	NA	NA	NA	NA	NA	GCST90200912	tryptophan to tyrosine ratio	11	57590610	0.0182433	6.03957e-09	8226	TRUE	reported	textfile	2	TRUE
rs41523449	A	G	A	G	0.107274	0.0753	0.141667	0.1568	FALSE	FALSE	FALSE	finn-b-M13_FIBROMYALGIA	19	35537706	0.0739	NA	0.3082	Fibromyalgia	Fibromyalgia	Fibromyalgia || ||	TRUE	igd	NA	NA	NA	NA	NA	NA	NA	GCST90200912	tryptophan to tyrosine ratio	19	35046802	0.0225174	1.89731e-06	8226	TRUE	reported	textfile	2	TRUE
rs55775622	G	T	G	T	0.0691913	-0.0127	0.384696	0.485	FALSE	FALSE	FALSE	finn-b-M13_FIBROMYALGIA	18	33165970	0.0529	NA	0.8107	Fibromyalgia	Fibromyalgia	Fibromyalgia || ||	TRUE	igd	NA	NA	NA	NA	NA	NA	NA	GCST90200912	tryptophan to tyrosine ratio	18	35586006	0.0155529	8.63641e-06	8226	TRUE	reported	textfile	2	TRUE
rs61876075	G	A	G	A	0.166145	0.1313	0.0435101	0.0593	FALSE	FALSE	FALSE	finn-b-M13_FIBROMYALGIA	11	23780151	0.1123	NA	0.2425	Fibromyalgia	Fibromyalgia	Fibromyalgia || ||	TRUE	igd	NA	NA	NA	NA	NA	NA	NA	GCST90200912	tryptophan to tyrosine ratio	11	23758605	0.0369459	6.89239e-06	8226	TRUE	reported	textfile	2	TRUE
rs66532723	A	G	A	G	-0.252806	0.0193	0.0196903	0.02081	FALSE	FALSE	FALSE	finn-b-M13_FIBROMYALGIA	12	81799985	0.1905	NA	0.9195	Fibromyalgia	Fibromyalgia	Fibromyalgia || ||	TRUE	igd	NA	NA	NA	NA	NA	NA	NA	GCST90200912	tryptophan to tyrosine ratio	12	81406206	0.054655	3.73704e-06	8226	TRUE	reported	textfile	2	TRUE
rs72774053	A	G	A	G	-0.343489	0.2924	0.00968567	0.007422	FALSE	FALSE	FALSE	finn-b-M13_FIBROMYALGIA	10	5728948	0.3209	NA	0.3622	Fibromyalgia	Fibromyalgia	Fibromyalgia || ||	TRUE	igd	NA	NA	NA	NA	NA	NA	NA	GCST90200912	tryptophan to tyrosine ratio	10	5686985	0.0776041	9.59187e-06	8226	TRUE	reported	textfile	2	TRUE
rs73232771	T	A	T	A	-0.248141	-0.2072	0.0236033	0.03258	FALSE	TRUE	FALSE	finn-b-M13_FIBROMYALGIA	3	142605449	0.1505	NA	0.1686	Fibromyalgia	Fibromyalgia	Fibromyalgia || ||	TRUE	igd	NA	NA	NA	NA	NA	NA	NA	GCST90200912	tryptophan to tyrosine ratio	3	142886607	0.0499097	6.63352e-07	8226	TRUE	reported	textfile	2	TRUE
rs77268855	A	G	A	G	-0.14896	-0.0528	0.0535649	0.07135	FALSE	FALSE	FALSE	finn-b-M13_FIBROMYALGIA	13	22859265	0.1036	NA	0.6105	Fibromyalgia	Fibromyalgia	Fibromyalgia || ||	TRUE	igd	NA	NA	NA	NA	NA	NA	NA	GCST90200912	tryptophan to tyrosine ratio	13	22285126	0.0336054	9.31002e-06	8226	TRUE	reported	textfile	2	TRUE
rs77295416	G	C	G	C	0.205295	0.256	0.0297714	0.0365	FALSE	TRUE	FALSE	finn-b-M13_FIBROMYALGIA	16	12362279	0.1413	NA	0.0701407	Fibromyalgia	Fibromyalgia	Fibromyalgia || ||	TRUE	igd	NA	NA	NA	NA	NA	NA	NA	GCST90200912	tryptophan to tyrosine ratio	16	12268422	0.0445042	3.97031e-06	8226	TRUE	reported	textfile	2	TRUE
rs77521810	G	A	G	A	-0.118387	0.1009	0.0924348	0.09398	FALSE	FALSE	FALSE	finn-b-M13_FIBROMYALGIA	19	13530305	0.0922	NA	0.2735	Fibromyalgia	Fibromyalgia	Fibromyalgia || ||	TRUE	igd	NA	NA	NA	NA	NA	NA	NA	GCST90200912	tryptophan to tyrosine ratio	19	13419491	0.0266391	8.82485e-06	8226	TRUE	reported	textfile	2	TRUE
rs79823475	C	T	C	T	0.237203	-0.3018	0.0238675	0.01557	FALSE	FALSE	FALSE	finn-b-M13_FIBROMYALGIA	2	53620747	0.2183	NA	0.1669	Fibromyalgia	Fibromyalgia	Fibromyalgia || ||	TRUE	igd	NA	NA	NA	NA	NA	NA	NA	GCST90200912	tryptophan to tyrosine ratio	2	53393609	0.0492292	1.4476e-06	8226	TRUE	reported	textfile	2	TRUE
rs9834292	A	T	A	T	-0.156872	0.0478	0.942325	0.9757	FALSE	TRUE	FALSE	finn-b-M13_FIBROMYALGIA	3	21857955	0.1749	NA	0.784701	Fibromyalgia	Fibromyalgia	Fibromyalgia || ||	TRUE	igd	NA	NA	NA	NA	NA	NA	NA	GCST90200912	tryptophan to tyrosine ratio	3	21816463	0.0331076	2.1556e-06	8226	TRUE	reported	textfile	2	TRUE
rs10010973	G	T	G	T	0.089141	-0.06	0.168895	0.079	FALSE	FALSE	FALSE	finn-b-M13_FIBROMYALGIA	4	38722089	0.0994	NA	0.545801	Fibromyalgia	Fibromyalgia	Fibromyalgia || ||	TRUE	igd	NA	NA	NA	NA	NA	NA	NA	GCST90199771	7-methylguanine levels	4	38720468	0.0199241	7.67584e-06	8239	TRUE	reported	textfile	2	TRUE
rs11112541	T	C	T	C	-0.219857	-0.0967	0.023469	0.03735	FALSE	FALSE	FALSE	finn-b-M13_FIBROMYALGIA	12	105857362	0.1422	NA	0.4964	Fibromyalgia	Fibromyalgia	Fibromyalgia || ||	TRUE	igd	NA	NA	NA	NA	NA	NA	NA	GCST90199771	7-methylguanine levels	12	105463584	0.0495863	9.25799e-06	8239	TRUE	reported	textfile	2	TRUE
rs111583939	G	A	G	A	-0.234037	-0.1026	0.0218027	0.009031	FALSE	FALSE	FALSE	finn-b-M13_FIBROMYALGIA	14	50375008	0.282	NA	0.715899	Fibromyalgia	Fibromyalgia	Fibromyalgia || ||	TRUE	igd	NA	NA	NA	NA	NA	NA	NA	GCST90199771	7-methylguanine levels	14	49908290	0.05152	5.55514e-06	8239	TRUE	reported	textfile	2	TRUE
rs115467519	A	G	A	G	0.309872	-0.0943	0.0125307	0.02027	FALSE	FALSE	FALSE	finn-b-M13_FIBROMYALGIA	6	14742656	0.1951	NA	0.628801	Fibromyalgia	Fibromyalgia	Fibromyalgia || ||	TRUE	igd	NA	NA	NA	NA	NA	NA	NA	GCST90199771	7-methylguanine levels	6	14742425	0.0676507	4.63936e-06	8239	TRUE	reported	textfile	2	TRUE
rs13394146	T	C	T	C	-0.0690565	-0.0687	0.405915	0.3989	FALSE	FALSE	FALSE	finn-b-M13_FIBROMYALGIA	2	55176112	0.0541	NA	0.2043	Fibromyalgia	Fibromyalgia	Fibromyalgia || ||	TRUE	igd	NA	NA	NA	NA	NA	NA	NA	GCST90199771	7-methylguanine levels	2	54948975	0.0153139	6.50093e-06	8239	TRUE	reported	textfile	2	TRUE
rs141133698	A	G	A	G	-0.222582	0.1446	0.0285366	0.04148	FALSE	FALSE	FALSE	finn-b-M13_FIBROMYALGIA	10	21530900	0.1332	NA	0.2778	Fibromyalgia	Fibromyalgia	Fibromyalgia || ||	TRUE	igd	NA	NA	NA	NA	NA	NA	NA	GCST90199771	7-methylguanine levels	10	21241971	0.0453286	9.08805e-07	8239	TRUE	reported	textfile	2	TRUE
rs142581143	A	G	A	G	0.203486	0.049	0.0318165	0.02945	FALSE	FALSE	FALSE	finn-b-M13_FIBROMYALGIA	8	35760374	0.1572	NA	0.7554	Fibromyalgia	Fibromyalgia	Fibromyalgia || ||	TRUE	igd	NA	NA	NA	NA	NA	NA	NA	GCST90199771	7-methylguanine levels	8	35902856	0.0423817	1.57665e-06	8239	TRUE	reported	textfile	2	TRUE
rs144952996	G	A	G	A	0.33795	-0.2326	0.0114124	0.03125	FALSE	FALSE	FALSE	finn-b-M13_FIBROMYALGIA	11	70166743	0.153	NA	0.1286	Fibromyalgia	Fibromyalgia	Fibromyalgia || ||	TRUE	igd	NA	NA	NA	NA	NA	NA	NA	GCST90199771	7-methylguanine levels	11	70320637	0.0711155	2.01282e-06	8239	TRUE	reported	textfile	2	TRUE
rs150494060	C	T	C	T	0.323048	0.15	0.0110352	0.01473	FALSE	FALSE	FALSE	finn-b-M13_FIBROMYALGIA	13	100809099	0.2232	NA	0.501601	Fibromyalgia	Fibromyalgia	Fibromyalgia || ||	TRUE	igd	NA	NA	NA	NA	NA	NA	NA	GCST90199771	7-methylguanine levels	13	100156845	0.0720741	7.38917e-06	8239	TRUE	reported	textfile	2	TRUE
rs250975	T	C	T	C	0.0684281	0.0053	0.396157	0.4295	FALSE	FALSE	FALSE	finn-b-M13_FIBROMYALGIA	2	234981061	0.0533	NA	0.9208	Fibromyalgia	Fibromyalgia	Fibromyalgia || ||	TRUE	igd	NA	NA	NA	NA	NA	NA	NA	GCST90199771	7-methylguanine levels	2	234072417	0.0154642	9.64755e-06	8239	TRUE	reported	textfile	2	TRUE
rs2596928	C	T	C	T	0.145542	-0.0468	0.0705058	0.09049	FALSE	FALSE	FALSE	finn-b-M13_FIBROMYALGIA	3	9385317	0.0919	NA	0.6106	Fibromyalgia	Fibromyalgia	Fibromyalgia || ||	TRUE	igd	NA	NA	NA	NA	NA	NA	NA	GCST90199771	7-methylguanine levels	3	9343633	0.0294467	7.71009e-07	8239	TRUE	reported	textfile	2	TRUE
rs503569	A	T	A	T	0.0725664	-0.0318	0.627247	0.6228	FALSE	TRUE	FALSE	finn-b-M13_FIBROMYALGIA	11	125904243	0.055	NA	0.562501	Fibromyalgia	Fibromyalgia	Fibromyalgia || ||	TRUE	igd	NA	NA	NA	NA	NA	NA	NA	GCST90199771	7-methylguanine levels	11	126034348	0.0158439	4.64785e-06	8239	TRUE	reported	textfile	2	TRUE
rs55754655	G	A	G	A	-0.157024	0.0071	0.136452	0.1005	FALSE	FALSE	FALSE	finn-b-M13_FIBROMYALGIA	2	201526330	0.0884	NA	0.9361	Fibromyalgia	Fibromyalgia	Fibromyalgia || ||	TRUE	igd	NA	NA	NA	NA	NA	NA	NA	GCST90199771	7-methylguanine levels	2	200661607	0.021644	4.02126e-13	8239	TRUE	reported	textfile	2	TRUE
rs59405278	T	G	T	G	-0.355676	0.1115	0.00950061	0.02896	FALSE	FALSE	FALSE	finn-b-M13_FIBROMYALGIA	2	11012426	0.1602	NA	0.4864	Fibromyalgia	Fibromyalgia	Fibromyalgia || ||	TRUE	igd	NA	NA	NA	NA	NA	NA	NA	GCST90199771	7-methylguanine levels	2	10872300	0.0775087	4.45691e-06	8239	TRUE	reported	textfile	2	TRUE
rs61736966	G	A	G	A	0.310436	0.0329	0.0134265	0.007714	FALSE	FALSE	FALSE	finn-b-M13_FIBROMYALGIA	9	137688701	0.2989	NA	0.9123	Fibromyalgia	Fibromyalgia	Fibromyalgia || ||	TRUE	igd	NA	NA	NA	NA	NA	NA	NA	GCST90199771	7-methylguanine levels	9	134796855	0.0650739	1.83753e-06	8239	TRUE	reported	textfile	2	TRUE
rs62199434	C	T	C	T	-0.0797547	-0.0369	0.251906	0.205	FALSE	FALSE	FALSE	finn-b-M13_FIBROMYALGIA	20	4740642	0.0659	NA	0.5751	Fibromyalgia	Fibromyalgia	Fibromyalgia || ||	TRUE	igd	NA	NA	NA	NA	NA	NA	NA	GCST90199771	7-methylguanine levels	20	4759996	0.0171287	3.22085e-06	8239	TRUE	reported	textfile	2	TRUE
rs62531487	G	A	G	A	-0.0822376	-0.0578	0.217614	0.291	FALSE	FALSE	FALSE	finn-b-M13_FIBROMYALGIA	9	7436777	0.0583	NA	0.321	Fibromyalgia	Fibromyalgia	Fibromyalgia || ||	TRUE	igd	NA	NA	NA	NA	NA	NA	NA	GCST90199771	7-methylguanine levels	9	7436777	0.0182285	6.43762e-06	8239	TRUE	reported	textfile	2	TRUE
rs75118450	C	T	C	T	-0.246307	0.2627	0.0183001	0.006105	FALSE	FALSE	FALSE	finn-b-M13_FIBROMYALGIA	3	155308920	0.3297	NA	0.4255	Fibromyalgia	Fibromyalgia	Fibromyalgia || ||	TRUE	igd	NA	NA	NA	NA	NA	NA	NA	GCST90199771	7-methylguanine levels	3	155591131	0.0557383	9.91638e-06	8239	TRUE	reported	textfile	2	TRUE
rs75607471	T	C	T	C	0.231536	-0.1427	0.0219747	0.0168	FALSE	FALSE	FALSE	finn-b-M13_FIBROMYALGIA	16	78224421	0.2078	NA	0.4921	Fibromyalgia	Fibromyalgia	Fibromyalgia || ||	TRUE	igd	NA	NA	NA	NA	NA	NA	NA	GCST90199771	7-methylguanine levels	16	78190524	0.0513179	6.42785e-06	8239	TRUE	reported	textfile	2	TRUE
rs76693762	G	C	G	C	-0.213571	-0.0649	0.0258957	0.01128	FALSE	TRUE	FALSE	finn-b-M13_FIBROMYALGIA	10	134200103	0.2581	NA	0.8016	Fibromyalgia	Fibromyalgia	Fibromyalgia || ||	TRUE	igd	NA	NA	NA	NA	NA	NA	NA	GCST90199771	7-methylguanine levels	10	132386599	0.0471838	6.00064e-06	8239	TRUE	reported	textfile	2	TRUE
rs7796997	T	A	T	A	-0.0789161	0.0692	0.288893	0.2518	FALSE	TRUE	FALSE	finn-b-M13_FIBROMYALGIA	7	51608316	0.0611	NA	0.2575	Fibromyalgia	Fibromyalgia	Fibromyalgia || ||	TRUE	igd	NA	NA	NA	NA	NA	NA	NA	GCST90199771	7-methylguanine levels	7	51540619	0.0166725	2.2088e-06	8239	TRUE	reported	textfile	2	TRUE
rs78324169	G	A	G	A	0.176367	-0.0099	0.0475583	0.09559	FALSE	FALSE	FALSE	finn-b-M13_FIBROMYALGIA	18	33786997	0.0898	NA	0.9119	Fibromyalgia	Fibromyalgia	Fibromyalgia || ||	TRUE	igd	NA	NA	NA	NA	NA	NA	NA	GCST90199771	7-methylguanine levels	18	36207034	0.0350844	4.98389e-07	8239	TRUE	reported	textfile	2	TRUE
rs10011241	C	T	C	T	-0.248843	-0.0538	0.0220873	0.009031	FALSE	FALSE	FALSE	finn-b-M13_FIBROMYALGIA	4	3278307	0.285	NA	0.8504	Fibromyalgia	Fibromyalgia	Fibromyalgia || ||	TRUE	igd	NA	NA	NA	NA	NA	NA	NA	GCST90199894	4-oxo-retinoic acid levels	4	3276580	0.0551649	6.4555e-06	7514	TRUE	reported	textfile	2	TRUE
rs115655613	A	G	A	G	-0.25946	0.0415	0.0191768	0.00615	FALSE	FALSE	FALSE	finn-b-M13_FIBROMYALGIA	2	214571618	0.361	NA	0.9085	Fibromyalgia	Fibromyalgia	Fibromyalgia || ||	TRUE	igd	NA	NA	NA	NA	NA	NA	NA	GCST90199894	4-oxo-retinoic acid levels	2	213706894	0.0582273	8.35082e-06	7514	TRUE	reported	textfile	2	TRUE
rs12606866	C	A	C	A	0.0799338	-0.0026	0.388852	0.4027	FALSE	FALSE	FALSE	finn-b-M13_FIBROMYALGIA	18	13497153	0.0546	NA	0.9614	Fibromyalgia	Fibromyalgia	Fibromyalgia || ||	TRUE	igd	NA	NA	NA	NA	NA	NA	NA	GCST90199894	4-oxo-retinoic acid levels	18	13497154	0.0165651	1.39692e-06	7514	TRUE	reported	textfile	2	TRUE
rs150127605	A	G	A	G	-0.194071	-0.0271	0.0461826	0.05272	FALSE	FALSE	FALSE	finn-b-M13_FIBROMYALGIA	12	1100259	0.1189	NA	0.8194	Fibromyalgia	Fibromyalgia	Fibromyalgia || ||	TRUE	igd	NA	NA	NA	NA	NA	NA	NA	GCST90199894	4-oxo-retinoic acid levels	12	991093	0.0382941	4.02209e-07	7514	TRUE	reported	textfile	2	TRUE
rs241600	G	T	G	T	-0.0759212	0.0545	0.422591	0.3977	FALSE	FALSE	FALSE	finn-b-M13_FIBROMYALGIA	20	3911270	0.054	NA	0.3134	Fibromyalgia	Fibromyalgia	Fibromyalgia || ||	TRUE	igd	NA	NA	NA	NA	NA	NA	NA	GCST90199894	4-oxo-retinoic acid levels	20	3930623	0.0164265	3.80297e-06	7514	TRUE	reported	textfile	2	TRUE
rs2596811	T	C	T	C	-0.0814821	0.0228	0.313295	0.3981	FALSE	FALSE	FALSE	finn-b-M13_FIBROMYALGIA	3	11629413	0.0541	NA	0.673701	Fibromyalgia	Fibromyalgia	Fibromyalgia || ||	TRUE	igd	NA	NA	NA	NA	NA	NA	NA	GCST90199894	4-oxo-retinoic acid levels	3	11587939	0.0173003	2.47887e-06	7514	TRUE	reported	textfile	2	TRUE
rs35911076	G	C	G	C	0.082684	0.0644	0.249433	0.2358	FALSE	TRUE	FALSE	finn-b-M13_FIBROMYALGIA	4	140315363	0.0622	NA	0.301	Fibromyalgia	Fibromyalgia	Fibromyalgia || ||	TRUE	igd	TRUE	rs35911076	rs6854669	G	C	A	G	GCST90199894	4-oxo-retinoic acid levels	4	139372736	0.0184475	7.39062e-06	7514	TRUE	reported	textfile	2	TRUE
rs4990638	C	T	C	T	-0.127511	0.1252	0.0935818	0.0945	FALSE	FALSE	FALSE	finn-b-M13_FIBROMYALGIA	17	32972729	0.0909	NA	0.168	Fibromyalgia	Fibromyalgia	Fibromyalgia || ||	TRUE	igd	NA	NA	NA	NA	NA	NA	NA	GCST90199894	4-oxo-retinoic acid levels	17	34645710	0.027789	4.46333e-06	7514	TRUE	reported	textfile	2	TRUE
rs603424	A	G	A	G	0.0962566	-0.0925	0.176923	0.1171	FALSE	FALSE	FALSE	finn-b-M13_FIBROMYALGIA	10	102075479	0.0833	NA	0.267	Fibromyalgia	Fibromyalgia	Fibromyalgia || ||	TRUE	igd	NA	NA	NA	NA	NA	NA	NA	GCST90199894	4-oxo-retinoic acid levels	10	100315722	0.0209516	4.34331e-06	7514	TRUE	reported	textfile	2	TRUE
rs6079225	C	G	C	G	0.128518	-0.0934	0.915917	0.9597	FALSE	TRUE	FALSE	finn-b-M13_FIBROMYALGIA	20	13907179	0.1369	NA	0.4953	Fibromyalgia	Fibromyalgia	Fibromyalgia || ||	TRUE	igd	NA	NA	NA	NA	NA	NA	NA	GCST90199894	4-oxo-retinoic acid levels	20	13926533	0.0288568	8.44269e-06	7514	TRUE	reported	textfile	2	TRUE
rs62051928	C	G	C	G	-0.0792331	-0.0177	0.321805	0.3041	FALSE	TRUE	FALSE	finn-b-M13_FIBROMYALGIA	16	86492471	0.0579	NA	0.7595	Fibromyalgia	Fibromyalgia	Fibromyalgia || ||	TRUE	igd	NA	NA	NA	NA	NA	NA	NA	GCST90199894	4-oxo-retinoic acid levels	16	86458865	0.0172945	4.61886e-06	7514	TRUE	reported	textfile	2	TRUE
rs66531867	G	A	G	A	0.150729	-0.0789	0.0675441	0.08171	FALSE	FALSE	FALSE	finn-b-M13_FIBROMYALGIA	18	28494923	0.0964	NA	0.4128	Fibromyalgia	Fibromyalgia	Fibromyalgia || ||	TRUE	igd	NA	NA	NA	NA	NA	NA	NA	GCST90199894	4-oxo-retinoic acid levels	18	30914957	0.0317899	2.12222e-06	7514	TRUE	reported	textfile	2	TRUE
rs6714486	A	T	A	T	-0.233236	-0.1014	0.0594476	0.03105	FALSE	TRUE	FALSE	finn-b-M13_FIBROMYALGIA	2	234580305	0.1527	NA	0.5067	Fibromyalgia	Fibromyalgia	Fibromyalgia || ||	TRUE	igd	NA	NA	NA	NA	NA	NA	NA	GCST90199894	4-oxo-retinoic acid levels	2	233671659	0.0336519	4.18344e-12	7514	TRUE	reported	textfile	2	TRUE
rs6721929	C	T	C	T	-0.0756867	0.0029	0.496459	0.4229	FALSE	FALSE	FALSE	finn-b-M13_FIBROMYALGIA	2	176725155	0.0535	NA	0.9569	Fibromyalgia	Fibromyalgia	Fibromyalgia || ||	TRUE	igd	NA	NA	NA	NA	NA	NA	NA	GCST90199894	4-oxo-retinoic acid levels	2	175860427	0.0162295	3.10817e-06	7514	TRUE	reported	textfile	2	TRUE
rs72551330	C	T	C	T	0.496596	-0.06	0.0148607	0.0153	FALSE	FALSE	FALSE	finn-b-M13_FIBROMYALGIA	2	234580678	0.2185	NA	0.783599	Fibromyalgia	Fibromyalgia	Fibromyalgia || ||	TRUE	igd	NA	NA	NA	NA	NA	NA	NA	GCST90199894	4-oxo-retinoic acid levels	2	233672032	0.0659387	5.0288e-14	7514	TRUE	reported	textfile	2	TRUE
rs72831044	G	T	G	T	-0.131909	-0.0544	0.0820181	0.03773	FALSE	FALSE	FALSE	finn-b-M13_FIBROMYALGIA	2	108786441	0.1402	NA	0.697999	Fibromyalgia	Fibromyalgia	Fibromyalgia || ||	TRUE	igd	NA	NA	NA	NA	NA	NA	NA	GCST90199894	4-oxo-retinoic acid levels	2	108169985	0.0292344	6.41847e-06	7514	TRUE	reported	textfile	2	TRUE
rs1001145	C	T	C	T	0.0806537	0.0843	0.252134	0.2896	FALSE	FALSE	FALSE	finn-b-M13_FIBROMYALGIA	6	108294470	0.0586	NA	0.1503	Fibromyalgia	Fibromyalgia	Fibromyalgia || ||	TRUE	igd	NA	NA	NA	NA	NA	NA	NA	GCST90200266	Cis-3,4-methyleneheptanoylcarnitine levels	6	107973266	0.0176193	4.70366e-06	8259	TRUE	reported	textfile	2	TRUE
rs1047891	A	C	A	C	-0.0775517	0.0532	0.309715	0.3223	FALSE	FALSE	FALSE	finn-b-M13_FIBROMYALGIA	2	211540507	0.0566	NA	0.347	Fibromyalgia	Fibromyalgia	Fibromyalgia || ||	TRUE	igd	NA	NA	NA	NA	NA	NA	NA	GCST90200266	Cis-3,4-methyleneheptanoylcarnitine levels	2	210675783	0.016503	2.61135e-06	8259	TRUE	reported	textfile	2	TRUE
rs11256316	G	A	G	A	0.121665	-0.0467	0.0942558	0.1347	FALSE	FALSE	FALSE	finn-b-M13_FIBROMYALGIA	10	9776594	0.0782	NA	0.550201	Fibromyalgia	Fibromyalgia	Fibromyalgia || ||	TRUE	igd	NA	NA	NA	NA	NA	NA	NA	GCST90200266	Cis-3,4-methyleneheptanoylcarnitine levels	10	9734631	0.0259446	2.73985e-06	8259	TRUE	reported	textfile	2	TRUE
rs114613601	G	C	G	C	0.222612	-0.0428	0.027737	0.03599	FALSE	TRUE	FALSE	finn-b-M13_FIBROMYALGIA	2	139529583	0.144	NA	0.766099	Fibromyalgia	Fibromyalgia	Fibromyalgia || ||	TRUE	igd	NA	NA	NA	NA	NA	NA	NA	GCST90200266	Cis-3,4-methyleneheptanoylcarnitine levels	2	138772013	0.0463591	1.57166e-06	8259	TRUE	reported	textfile	2	TRUE
rs1171615	T	C	T	C	0.151311	-0.1399	0.77086	0.8416	FALSE	FALSE	FALSE	finn-b-M13_FIBROMYALGIA	10	61469090	0.0725	NA	0.0534897	Fibromyalgia	Fibromyalgia	Fibromyalgia || ||	TRUE	igd	NA	NA	NA	NA	NA	NA	NA	GCST90200266	Cis-3,4-methyleneheptanoylcarnitine levels	10	59709332	0.0184204	2.13395e-16	8259	TRUE	reported	textfile	2	TRUE
rs117842847	T	G	T	G	-0.823781	0.0848	0.00200194	0.03178	FALSE	FALSE	FALSE	finn-b-M13_FIBROMYALGIA	22	40402781	0.1524	NA	0.5781	Fibromyalgia	Fibromyalgia	Fibromyalgia || ||	TRUE	igd	NA	NA	NA	NA	NA	NA	NA	GCST90200266	Cis-3,4-methyleneheptanoylcarnitine levels	22	40006777	0.169975	1.2567e-06	8259	TRUE	reported	textfile	2	TRUE
rs118119345	G	A	G	A	-0.330777	-0.1377	0.0106667	0.0204	FALSE	FALSE	FALSE	finn-b-M13_FIBROMYALGIA	8	110027321	0.1871	NA	0.4617	Fibromyalgia	Fibromyalgia	Fibromyalgia || ||	TRUE	igd	NA	NA	NA	NA	NA	NA	NA	GCST90200266	Cis-3,4-methyleneheptanoylcarnitine levels	8	109015092	0.0742665	8.4318e-06	8259	TRUE	reported	textfile	2	TRUE
rs12642833	G	A	G	A	-0.0693011	0.0331	0.396206	0.3845	FALSE	FALSE	FALSE	finn-b-M13_FIBROMYALGIA	4	65893340	0.0545	NA	0.5433	Fibromyalgia	Fibromyalgia	Fibromyalgia || ||	TRUE	igd	NA	NA	NA	NA	NA	NA	NA	GCST90200266	Cis-3,4-methyleneheptanoylcarnitine levels	4	65027622	0.015442	7.19511e-06	8259	TRUE	reported	textfile	2	TRUE
rs1290650	G	A	G	A	0.0699397	0.0216	0.549429	0.6801	FALSE	FALSE	FALSE	finn-b-M13_FIBROMYALGIA	19	50329684	0.0567	NA	0.702901	Fibromyalgia	Fibromyalgia	Fibromyalgia || ||	TRUE	igd	NA	NA	NA	NA	NA	NA	NA	GCST90200266	Cis-3,4-methyleneheptanoylcarnitine levels	19	49826427	0.0152721	4.65952e-06	8259	TRUE	reported	textfile	2	TRUE
rs139358468	C	T	C	T	0.282336	0.1171	0.0169079	0.01252	FALSE	FALSE	FALSE	finn-b-M13_FIBROMYALGIA	7	152624097	0.2495	NA	0.6389	Fibromyalgia	Fibromyalgia	Fibromyalgia || ||	TRUE	igd	NA	NA	NA	NA	NA	NA	NA	GCST90200266	Cis-3,4-methyleneheptanoylcarnitine levels	7	152927012	0.0597716	2.31732e-06	8259	TRUE	reported	textfile	2	TRUE
rs141575755	A	G	A	G	-0.202039	-0.0297	0.038254	0.06036	FALSE	FALSE	FALSE	finn-b-M13_FIBROMYALGIA	12	26486177	0.1122	NA	0.7914	Fibromyalgia	Fibromyalgia	Fibromyalgia || ||	TRUE	igd	NA	NA	NA	NA	NA	NA	NA	GCST90200266	Cis-3,4-methyleneheptanoylcarnitine levels	12	26333244	0.0395707	3.29478e-07	8259	TRUE	reported	textfile	2	TRUE
rs147886311	T	C	T	C	-0.415495	0.0119	0.00664472	0.05139	FALSE	FALSE	FALSE	finn-b-M13_FIBROMYALGIA	2	7023734	0.1227	NA	0.9226	Fibromyalgia	Fibromyalgia	Fibromyalgia || ||	TRUE	igd	NA	NA	NA	NA	NA	NA	NA	GCST90200266	Cis-3,4-methyleneheptanoylcarnitine levels	2	6883603	0.0922822	6.71781e-06	8259	TRUE	reported	textfile	2	TRUE
rs247001	G	A	G	A	-0.0707454	0.0062	0.446168	0.5134	FALSE	FALSE	FALSE	finn-b-M13_FIBROMYALGIA	5	131346461	0.0529	NA	0.9073	Fibromyalgia	Fibromyalgia	Fibromyalgia || ||	TRUE	igd	NA	NA	NA	NA	NA	NA	NA	GCST90200266	Cis-3,4-methyleneheptanoylcarnitine levels	5	132010768	0.0153159	3.85428e-06	8259	TRUE	reported	textfile	2	TRUE
rs2999541	C	G	C	G	-0.102003	-0.0175	0.625607	0.6535	FALSE	TRUE	FALSE	finn-b-M13_FIBROMYALGIA	1	151898749	0.0555	NA	0.752199	Fibromyalgia	Fibromyalgia	Fibromyalgia || ||	TRUE	igd	NA	NA	NA	NA	NA	NA	NA	GCST90200266	Cis-3,4-methyleneheptanoylcarnitine levels	1	151926273	0.0156807	7.76739e-11	8259	TRUE	reported	textfile	2	TRUE
rs324420	A	C	A	C	-0.0846083	0.0481	0.208571	0.2835	FALSE	FALSE	FALSE	finn-b-M13_FIBROMYALGIA	1	46870761	0.0587	NA	0.4124	Fibromyalgia	Fibromyalgia	Fibromyalgia || ||	TRUE	igd	NA	NA	NA	NA	NA	NA	NA	GCST90200266	Cis-3,4-methyleneheptanoylcarnitine levels	1	46405089	0.0186619	5.79481e-06	8259	TRUE	reported	textfile	2	TRUE
rs4740797	A	G	A	G	0.132106	-0.0939	0.0829873	0.1053	FALSE	FALSE	FALSE	finn-b-M13_FIBROMYALGIA	9	4636990	0.0855	NA	0.2722	Fibromyalgia	Fibromyalgia	Fibromyalgia || ||	TRUE	igd	NA	NA	NA	NA	NA	NA	NA	GCST90200266	Cis-3,4-methyleneheptanoylcarnitine levels	9	4636990	0.0275694	1.65317e-06	8259	TRUE	reported	textfile	2	TRUE
rs476451	T	C	T	C	0.0867827	-0.0463	0.76303	0.7151	FALSE	FALSE	FALSE	finn-b-M13_FIBROMYALGIA	11	55258173	0.0671	NA	0.4905	Fibromyalgia	Fibromyalgia	Fibromyalgia || ||	TRUE	igd	NA	NA	NA	NA	NA	NA	NA	GCST90200266	Cis-3,4-methyleneheptanoylcarnitine levels	11	55490697	0.0179656	1.36196e-06	8259	TRUE	reported	textfile	2	TRUE
rs4770259	A	C	A	C	0.132541	0.0429	0.0757193	0.05854	FALSE	FALSE	FALSE	finn-b-M13_FIBROMYALGIA	13	22825787	0.1144	NA	0.7079	Fibromyalgia	Fibromyalgia	Fibromyalgia || ||	TRUE	igd	NA	NA	NA	NA	NA	NA	NA	GCST90200266	Cis-3,4-methyleneheptanoylcarnitine levels	13	22251648	0.0293301	6.21452e-06	8259	TRUE	reported	textfile	2	TRUE
rs56212584	G	A	G	A	-0.116414	-0.0309	0.101419	0.1035	FALSE	FALSE	FALSE	finn-b-M13_FIBROMYALGIA	7	70614846	0.0881	NA	0.7256	Fibromyalgia	Fibromyalgia	Fibromyalgia || ||	TRUE	igd	NA	NA	NA	NA	NA	NA	NA	GCST90200266	Cis-3,4-methyleneheptanoylcarnitine levels	7	71149860	0.0248532	2.81215e-06	8259	TRUE	reported	textfile	2	TRUE
rs662138	G	C	G	C	-0.245472	-0.0443	0.174671	0.1467	FALSE	TRUE	FALSE	finn-b-M13_FIBROMYALGIA	6	160564476	0.075	NA	0.554501	Fibromyalgia	Fibromyalgia	Fibromyalgia || ||	TRUE	igd	NA	NA	NA	NA	NA	NA	NA	GCST90200266	Cis-3,4-methyleneheptanoylcarnitine levels	6	160143444	0.0198946	5.61071e-35	8259	TRUE	reported	textfile	2	TRUE
rs72802659	C	G	C	G	-0.141694	0.0681	0.0679255	0.04673	FALSE	TRUE	FALSE	finn-b-M13_FIBROMYALGIA	5	153018815	0.1267	NA	0.590799	Fibromyalgia	Fibromyalgia	Fibromyalgia || ||	TRUE	igd	NA	NA	NA	NA	NA	NA	NA	GCST90200266	Cis-3,4-methyleneheptanoylcarnitine levels	5	153639255	0.0301116	2.53102e-06	8259	TRUE	reported	textfile	2	TRUE
rs78382346	A	G	A	G	-0.128511	0.0852	0.0823322	0.09549	FALSE	FALSE	FALSE	finn-b-M13_FIBROMYALGIA	6	4862687	0.0905	NA	0.3467	Fibromyalgia	Fibromyalgia	Fibromyalgia || ||	TRUE	igd	NA	NA	NA	NA	NA	NA	NA	GCST90200266	Cis-3,4-methyleneheptanoylcarnitine levels	6	4862453	0.0273301	2.57379e-06	8259	TRUE	reported	textfile	2	TRUE
rs79439304	T	C	T	C	-0.30849	-0.062	0.0132548	0.05097	FALSE	FALSE	FALSE	finn-b-M13_FIBROMYALGIA	6	144199620	0.1255	NA	0.6216	Fibromyalgia	Fibromyalgia	Fibromyalgia || ||	TRUE	igd	NA	NA	NA	NA	NA	NA	NA	GCST90200266	Cis-3,4-methyleneheptanoylcarnitine levels	6	143878483	0.0672112	4.43553e-06	8259	TRUE	reported	textfile	2	TRUE
rs80254170	G	A	G	A	-0.257157	0.1232	0.0752636	0.07111	FALSE	FALSE	FALSE	finn-b-M13_FIBROMYALGIA	6	160514283	0.1039	NA	0.2354	Fibromyalgia	Fibromyalgia	Fibromyalgia || ||	TRUE	igd	NA	NA	NA	NA	NA	NA	NA	GCST90200266	Cis-3,4-methyleneheptanoylcarnitine levels	6	160093251	0.0284005	1.36992e-19	8259	TRUE	reported	textfile	2	TRUE
rs10011572	T	G	T	G	-0.0926567	0.0729	0.829274	0.7745	FALSE	FALSE	FALSE	finn-b-M13_FIBROMYALGIA	4	184927410	0.0632	NA	0.2485	Fibromyalgia	Fibromyalgia	Fibromyalgia || ||	TRUE	igd	NA	NA	NA	NA	NA	NA	NA	GCST90200362	Succinate levels	4	184006257	0.0204757	6.0337e-06	7943	TRUE	reported	textfile	2	TRUE
rs11176426	T	C	T	C	0.117747	-0.0358	0.0977034	0.04666	FALSE	FALSE	FALSE	finn-b-M13_FIBROMYALGIA	12	67177425	0.1287	NA	0.781	Fibromyalgia	Fibromyalgia	Fibromyalgia || ||	TRUE	igd	NA	NA	NA	NA	NA	NA	NA	GCST90200362	Succinate levels	12	66783645	0.0260672	6.27123e-06	7943	TRUE	reported	textfile	2	TRUE
rs112395657	G	A	G	A	-0.207437	0.0763	0.0306509	0.04195	FALSE	FALSE	FALSE	finn-b-M13_FIBROMYALGIA	2	182705841	0.1308	NA	0.56	Fibromyalgia	Fibromyalgia	Fibromyalgia || ||	TRUE	igd	NA	NA	NA	NA	NA	NA	NA	GCST90200362	Succinate levels	2	181841114	0.0450335	4.09913e-06	7943	TRUE	reported	textfile	2	TRUE
rs117024175	T	C	T	C	-1.49269	-0.0503	0.000567322	0.05427	FALSE	FALSE	FALSE	finn-b-M13_FIBROMYALGIA	20	2136594	0.117	NA	0.6675	Fibromyalgia	Fibromyalgia	Fibromyalgia || ||	TRUE	igd	NA	NA	NA	NA	NA	NA	NA	GCST90200362	Succinate levels	20	2155948	0.324998	4.3708e-06	7943	TRUE	reported	textfile	2	TRUE
rs12207685	T	C	T	C	-0.222838	0.0413	0.0252175	0.04891	FALSE	FALSE	FALSE	finn-b-M13_FIBROMYALGIA	6	56526674	0.1234	NA	0.737801	Fibromyalgia	Fibromyalgia	Fibromyalgia || ||	TRUE	igd	NA	NA	NA	NA	NA	NA	NA	GCST90200362	Succinate levels	6	56661876	0.0496088	7.05938e-06	7943	TRUE	reported	textfile	2	TRUE
rs1333261	T	C	T	C	-0.0871587	-0.0682	0.234953	0.3185	FALSE	FALSE	FALSE	finn-b-M13_FIBROMYALGIA	13	94906103	0.0575	NA	0.2351	Fibromyalgia	Fibromyalgia	Fibromyalgia || ||	TRUE	igd	NA	NA	NA	NA	NA	NA	NA	GCST90200362	Succinate levels	13	94253849	0.0185301	2.55579e-06	7943	TRUE	reported	textfile	2	TRUE
rs138715624	T	C	T	C	-0.335794	0.0699	0.011831	0.0139	FALSE	FALSE	FALSE	finn-b-M13_FIBROMYALGIA	12	109527102	0.2301	NA	0.7615	Fibromyalgia	Fibromyalgia	Fibromyalgia || ||	TRUE	igd	NA	NA	NA	NA	NA	NA	NA	GCST90200362	Succinate levels	12	109089297	0.0717246	2.84484e-06	7943	TRUE	reported	textfile	2	TRUE
rs139641222	C	T	C	T	-0.366247	-0.0504	0.00965202	0.0193	FALSE	FALSE	FALSE	finn-b-M13_FIBROMYALGIA	1	182855885	0.196	NA	0.797	Fibromyalgia	Fibromyalgia	Fibromyalgia || ||	TRUE	igd	NA	NA	NA	NA	NA	NA	NA	GCST90200362	Succinate levels	1	182886750	0.0792815	3.84533e-06	7943	TRUE	reported	textfile	2	TRUE
rs34466066	G	T	G	T	-0.0929812	-0.0193	0.16757	0.134	FALSE	FALSE	FALSE	finn-b-M13_FIBROMYALGIA	16	78278009	0.0785	NA	0.8056	Fibromyalgia	Fibromyalgia	Fibromyalgia || ||	TRUE	igd	NA	NA	NA	NA	NA	NA	NA	GCST90200362	Succinate levels	16	78244112	0.0207978	7.79595e-06	7943	TRUE	reported	textfile	2	TRUE
rs390266	A	G	A	G	0.0791891	0.0256	0.286215	0.2079	FALSE	FALSE	FALSE	finn-b-M13_FIBROMYALGIA	11	2919469	0.0666	NA	0.7009	Fibromyalgia	Fibromyalgia	Fibromyalgia || ||	TRUE	igd	NA	NA	NA	NA	NA	NA	NA	GCST90200362	Succinate levels	11	2898239	0.01709	3.59263e-06	7943	TRUE	reported	textfile	2	TRUE
rs4837476	C	T	C	T	-0.0914604	0.0732	0.188935	0.263	FALSE	FALSE	FALSE	finn-b-M13_FIBROMYALGIA	9	132937533	0.0599	NA	0.2215	Fibromyalgia	Fibromyalgia	Fibromyalgia || ||	TRUE	igd	NA	NA	NA	NA	NA	NA	NA	GCST90200362	Succinate levels	9	130175254	0.0196758	3.34575e-06	7943	TRUE	reported	textfile	2	TRUE
rs6784383	C	T	C	T	0.307822	-0.4683	0.0137574	0.02833	FALSE	FALSE	FALSE	finn-b-M13_FIBROMYALGIA	3	55576704	0.1639	NA	0.00427396	Fibromyalgia	Fibromyalgia	Fibromyalgia || ||	TRUE	igd	NA	NA	NA	NA	NA	NA	NA	GCST90200362	Succinate levels	3	55542676	0.066611	3.81565e-06	7943	TRUE	reported	textfile	2	TRUE
rs6794935	T	G	T	G	0.0825503	0.0705	0.752261	0.6918	FALSE	FALSE	FALSE	finn-b-M13_FIBROMYALGIA	3	115371533	0.0577	NA	0.2216	Fibromyalgia	Fibromyalgia	Fibromyalgia || ||	TRUE	igd	NA	NA	NA	NA	NA	NA	NA	GCST90200362	Succinate levels	3	115652686	0.0186111	9.18455e-06	7943	TRUE	reported	textfile	2	TRUE
rs75039175	T	C	T	C	0.391887	0.1235	0.00750221	0.01043	FALSE	FALSE	FALSE	finn-b-M13_FIBROMYALGIA	3	95743278	0.2586	NA	0.6329	Fibromyalgia	Fibromyalgia	Fibromyalgia || ||	TRUE	igd	NA	NA	NA	NA	NA	NA	NA	GCST90200362	Succinate levels	3	96024434	0.088507	9.52232e-06	7943	TRUE	reported	textfile	2	TRUE
rs75063089	A	G	A	G	-0.443762	-0.5055	0.00738077	0.003103	FALSE	FALSE	FALSE	finn-b-M13_FIBROMYALGIA	1	99831832	0.5204	NA	0.3314	Fibromyalgia	Fibromyalgia	Fibromyalgia || ||	TRUE	igd	NA	NA	NA	NA	NA	NA	NA	GCST90200362	Succinate levels	1	99366276	0.0899821	8.15279e-07	7943	TRUE	reported	textfile	2	TRUE
rs75318517	T	C	T	C	-0.231443	0.5512	0.02269	0.008558	FALSE	FALSE	FALSE	finn-b-M13_FIBROMYALGIA	7	25077946	0.3046	NA	0.0703801	Fibromyalgia	Fibromyalgia	Fibromyalgia || ||	TRUE	igd	NA	NA	NA	NA	NA	NA	NA	GCST90200362	Succinate levels	7	25038327	0.0522607	9.48391e-06	7943	TRUE	reported	textfile	2	TRUE
rs75668162	T	C	T	C	-0.374901	-0.1768	0.0093246	0.002432	FALSE	FALSE	FALSE	finn-b-M13_FIBROMYALGIA	1	61505869	0.558	NA	0.7514	Fibromyalgia	Fibromyalgia	Fibromyalgia || ||	TRUE	igd	NA	NA	NA	NA	NA	NA	NA	GCST90200362	Succinate levels	1	61040197	0.0808559	3.54099e-06	7943	TRUE	reported	textfile	2	TRUE
rs75840919	T	C	T	C	0.218053	0.0671	0.02701	0.02401	FALSE	FALSE	FALSE	finn-b-M13_FIBROMYALGIA	2	236100160	0.173	NA	0.697999	Fibromyalgia	Fibromyalgia	Fibromyalgia || ||	TRUE	igd	NA	NA	NA	NA	NA	NA	NA	GCST90200362	Succinate levels	2	235191516	0.0480726	5.73585e-06	7943	TRUE	reported	textfile	2	TRUE
rs77933094	C	T	C	T	-0.347294	-0.1159	0.00974314	0.009161	FALSE	FALSE	FALSE	finn-b-M13_FIBROMYALGIA	12	94820434	0.2756	NA	0.6743	Fibromyalgia	Fibromyalgia	Fibromyalgia || ||	TRUE	igd	NA	NA	NA	NA	NA	NA	NA	GCST90200362	Succinate levels	12	94426658	0.0782691	9.11467e-06	7943	TRUE	reported	textfile	2	TRUE
rs78010144	G	A	G	A	-0.457238	0.2776	0.00667927	0.00707	FALSE	FALSE	FALSE	finn-b-M13_FIBROMYALGIA	3	191443450	0.3119	NA	0.3734	Fibromyalgia	Fibromyalgia	Fibromyalgia || ||	TRUE	igd	NA	NA	NA	NA	NA	NA	NA	GCST90200362	Succinate levels	3	191725661	0.0952845	1.59729e-06	7943	TRUE	reported	textfile	2	TRUE
rs79884158	T	C	T	C	-0.384004	-0.5029	0.00819156	0.0047	FALSE	FALSE	FALSE	finn-b-M13_FIBROMYALGIA	5	95194109	0.4029	NA	0.2119	Fibromyalgia	Fibromyalgia	Fibromyalgia || ||	TRUE	igd	NA	NA	NA	NA	NA	NA	NA	GCST90200362	Succinate levels	5	95858405	0.0855067	7.09155e-06	7943	TRUE	reported	textfile	2	TRUE
rs9905991	G	A	G	A	0.0718758	0.0069	0.545215	0.5334	FALSE	FALSE	FALSE	finn-b-M13_FIBROMYALGIA	17	80052073	0.0531	NA	0.8966	Fibromyalgia	Fibromyalgia	Fibromyalgia || ||	TRUE	igd	NA	NA	NA	NA	NA	NA	NA	GCST90200362	Succinate levels	17	82094197	0.0157695	5.16671e-06	7943	TRUE	reported	textfile	2	TRUE
rs10011993	C	A	C	A	0.0809351	0.0213	0.381019	0.4391	FALSE	FALSE	FALSE	finn-b-M13_FIBROMYALGIA	4	67093452	0.0535	NA	0.6901	Fibromyalgia	Fibromyalgia	Fibromyalgia || ||	TRUE	igd	NA	NA	NA	NA	NA	NA	NA	GCST90200258	2-hydroxy-4-(methylthio)butanoic acid levels	4	66227734	0.0154775	1.70236e-07	8255	TRUE	reported	textfile	2	TRUE
rs10201698	C	G	C	G	0.0723808	0.0136	0.34712	0.348	FALSE	TRUE	FALSE	finn-b-M13_FIBROMYALGIA	2	44025355	0.0559	NA	0.8075	Fibromyalgia	Fibromyalgia	Fibromyalgia || ||	TRUE	igd	NA	NA	NA	NA	NA	NA	NA	GCST90200258	2-hydroxy-4-(methylthio)butanoic acid levels	2	43798216	0.0159664	5.80624e-06	8255	TRUE	reported	textfile	2	TRUE
rs10766467	C	T	C	T	-0.170109	-0.031	0.539916	0.5279	FALSE	FALSE	FALSE	finn-b-M13_FIBROMYALGIA	11	18310449	0.0531	NA	0.559399	Fibromyalgia	Fibromyalgia	Fibromyalgia || ||	TRUE	igd	NA	NA	NA	NA	NA	NA	NA	GCST90200258	2-hydroxy-4-(methylthio)butanoic acid levels	11	18288902	0.0148559	2.33439e-30	8255	TRUE	reported	textfile	2	TRUE
rs10846866	A	T	A	T	-0.0795386	-0.096	0.287423	0.3295	FALSE	TRUE	FALSE	finn-b-M13_FIBROMYALGIA	12	125780617	0.0563	NA	0.0884097	Fibromyalgia	Fibromyalgia	Fibromyalgia || ||	TRUE	igd	NA	NA	NA	NA	NA	NA	NA	GCST90200258	2-hydroxy-4-(methylthio)butanoic acid levels	12	125296071	0.0169815	2.81544e-06	8255	TRUE	reported	textfile	2	TRUE
rs10923821	T	C	T	C	0.0767595	-0.0001	0.662956	0.7142	FALSE	FALSE	FALSE	finn-b-M13_FIBROMYALGIA	1	119983562	0.0585	NA	0.9986	Fibromyalgia	Fibromyalgia	Fibromyalgia || ||	TRUE	igd	NA	NA	NA	NA	NA	NA	NA	GCST90200258	2-hydroxy-4-(methylthio)butanoic acid levels	1	119440939	0.0163212	2.56298e-06	8255	TRUE	reported	textfile	2	TRUE
rs113090967	A	G	A	G	0.0975091	-0.0518	0.144162	0.1361	FALSE	FALSE	FALSE	finn-b-M13_FIBROMYALGIA	3	159751185	0.0786	NA	0.5098	Fibromyalgia	Fibromyalgia	Fibromyalgia || ||	TRUE	igd	NA	NA	NA	NA	NA	NA	NA	GCST90200258	2-hydroxy-4-(methylthio)butanoic acid levels	3	160033398	0.0215752	6.19887e-06	8255	TRUE	reported	textfile	2	TRUE
rs114261009	A	C	A	C	-0.450884	0.4809	0.00588664	0.002005	FALSE	FALSE	FALSE	finn-b-M13_FIBROMYALGIA	5	44605828	0.6234	NA	0.4405	Fibromyalgia	Fibromyalgia	Fibromyalgia || ||	TRUE	igd	NA	NA	NA	NA	NA	NA	NA	GCST90200258	2-hydroxy-4-(methylthio)butanoic acid levels	5	44605726	0.0974594	3.7212e-06	8255	TRUE	reported	textfile	2	TRUE
rs11522698	A	G	A	G	0.0890865	-0.0741	0.270343	0.288	FALSE	FALSE	FALSE	finn-b-M13_FIBROMYALGIA	11	104801297	0.0584	NA	0.2048	Fibromyalgia	Fibromyalgia	Fibromyalgia || ||	TRUE	igd	NA	NA	NA	NA	NA	NA	NA	GCST90200258	2-hydroxy-4-(methylthio)butanoic acid levels	11	104930570	0.0172276	2.32662e-07	8255	TRUE	reported	textfile	2	TRUE
rs116952655	G	T	G	T	-0.267896	-0.1973	0.0171828	0.01376	FALSE	FALSE	FALSE	finn-b-M13_FIBROMYALGIA	18	23315746	0.2267	NA	0.3841	Fibromyalgia	Fibromyalgia	Fibromyalgia || ||	TRUE	igd	NA	NA	NA	NA	NA	NA	NA	GCST90200258	2-hydroxy-4-(methylthio)butanoic acid levels	18	25735782	0.0576902	3.42234e-06	8255	TRUE	reported	textfile	2	TRUE
rs13250531	C	G	C	G	0.134988	-0.0238	0.0705918	0.07327	FALSE	TRUE	FALSE	finn-b-M13_FIBROMYALGIA	8	3733157	0.1011	NA	0.8135	Fibromyalgia	Fibromyalgia	Fibromyalgia || ||	TRUE	igd	NA	NA	NA	NA	NA	NA	NA	GCST90200258	2-hydroxy-4-(methylthio)butanoic acid levels	8	3875635	0.029479	4.66897e-06	8255	TRUE	reported	textfile	2	TRUE
rs140959752	A	C	A	C	-0.163506	0.0734	0.0434704	0.02005	FALSE	FALSE	FALSE	finn-b-M13_FIBROMYALGIA	5	60582891	0.1958	NA	0.7076	Fibromyalgia	Fibromyalgia	Fibromyalgia || ||	TRUE	igd	NA	NA	NA	NA	NA	NA	NA	GCST90200258	2-hydroxy-4-(methylthio)butanoic acid levels	5	61287064	0.0370121	9.97848e-06	8255	TRUE	reported	textfile	2	TRUE
rs141331	A	G	A	G	0.0720263	0.028	0.60801	0.5814	FALSE	FALSE	FALSE	finn-b-M13_FIBROMYALGIA	5	76706532	0.0535	NA	0.600701	Fibromyalgia	Fibromyalgia	Fibromyalgia || ||	TRUE	igd	NA	NA	NA	NA	NA	NA	NA	GCST90200258	2-hydroxy-4-(methylthio)butanoic acid levels	5	77410707	0.0154888	3.316e-06	8255	TRUE	reported	textfile	2	TRUE
rs142801739	T	C	T	C	0.231748	0.0645	0.0275514	0.02783	FALSE	FALSE	FALSE	finn-b-M13_FIBROMYALGIA	10	11211174	0.1622	NA	0.691	Fibromyalgia	Fibromyalgia	Fibromyalgia || ||	TRUE	igd	NA	NA	NA	NA	NA	NA	NA	GCST90200258	2-hydroxy-4-(methylthio)butanoic acid levels	10	11169211	0.045844	4.30065e-07	8255	TRUE	reported	textfile	2	TRUE
rs183640109	A	G	A	G	0.222992	-0.2051	0.0230263	0.02547	FALSE	FALSE	FALSE	finn-b-M13_FIBROMYALGIA	3	78423451	0.1686	NA	0.2238	Fibromyalgia	Fibromyalgia	Fibromyalgia || ||	TRUE	igd	NA	NA	NA	NA	NA	NA	NA	GCST90200258	2-hydroxy-4-(methylthio)butanoic acid levels	3	78374301	0.0500859	8.49971e-06	8255	TRUE	reported	textfile	2	TRUE
rs1846285	G	A	G	A	0.0890115	0.017	0.18232	0.1526	FALSE	FALSE	FALSE	finn-b-M13_FIBROMYALGIA	11	49470419	0.0842	NA	0.8396	Fibromyalgia	Fibromyalgia	Fibromyalgia || ||	TRUE	igd	NA	NA	NA	NA	NA	NA	NA	GCST90200258	2-hydroxy-4-(methylthio)butanoic acid levels	11	49448867	0.019355	4.24745e-06	8255	TRUE	reported	textfile	2	TRUE
rs1856661	C	G	C	G	0.299331	-0.1389	0.01255	0.02315	FALSE	TRUE	FALSE	finn-b-M13_FIBROMYALGIA	10	86949264	0.1758	NA	0.4295	Fibromyalgia	Fibromyalgia	Fibromyalgia || ||	TRUE	igd	NA	NA	NA	NA	NA	NA	NA	GCST90200258	2-hydroxy-4-(methylthio)butanoic acid levels	10	85189508	0.0668853	7.63083e-06	8255	TRUE	reported	textfile	2	TRUE
rs186411642	A	C	A	C	-0.556826	0.2569	0.00406652	0.02095	FALSE	FALSE	FALSE	finn-b-M13_FIBROMYALGIA	4	106662156	0.1821	NA	0.1583	Fibromyalgia	Fibromyalgia	Fibromyalgia || ||	TRUE	igd	NA	NA	NA	NA	NA	NA	NA	GCST90200258	2-hydroxy-4-(methylthio)butanoic acid levels	4	105740999	0.11826	2.49554e-06	8255	TRUE	reported	textfile	2	TRUE
rs2126886	T	C	T	C	0.082341	-0.0422	0.784207	0.8094	FALSE	FALSE	FALSE	finn-b-M13_FIBROMYALGIA	12	21701300	0.0669	NA	0.5281	Fibromyalgia	Fibromyalgia	Fibromyalgia || ||	TRUE	igd	NA	NA	NA	NA	NA	NA	NA	GCST90200258	2-hydroxy-4-(methylthio)butanoic acid levels	12	21548366	0.0183291	7.04362e-06	8255	TRUE	reported	textfile	2	TRUE
rs2765527	C	T	C	T	-0.436372	0.009	0.493491	0.5512	FALSE	FALSE	FALSE	finn-b-M13_FIBROMYALGIA	1	89426260	0.0531	NA	0.865	Fibromyalgia	Fibromyalgia	Fibromyalgia || ||	TRUE	igd	NA	NA	NA	NA	NA	NA	NA	GCST90200258	2-hydroxy-4-(methylthio)butanoic acid levels	1	88960577	0.0142751	1e-200	8255	TRUE	reported	textfile	2	TRUE
rs4656106	C	T	C	T	-0.109283	-0.0202	0.164955	0.1396	FALSE	FALSE	FALSE	finn-b-M13_FIBROMYALGIA	1	89699679	0.0774	NA	0.7945	Fibromyalgia	Fibromyalgia	Fibromyalgia || ||	TRUE	igd	NA	NA	NA	NA	NA	NA	NA	GCST90200258	2-hydroxy-4-(methylthio)butanoic acid levels	1	89233996	0.02028	7.09698e-08	8255	TRUE	reported	textfile	2	TRUE
rs490379	C	A	C	A	-0.124448	-0.0619	0.13616	0.09268	FALSE	FALSE	FALSE	finn-b-M13_FIBROMYALGIA	1	88717899	0.0916	NA	0.498901	Fibromyalgia	Fibromyalgia	Fibromyalgia || ||	TRUE	igd	NA	NA	NA	NA	NA	NA	NA	GCST90200258	2-hydroxy-4-(methylthio)butanoic acid levels	1	88252216	0.0218311	1.19464e-08	8255	TRUE	reported	textfile	2	TRUE
rs59543093	T	C	T	C	-0.185892	0.2801	0.0388031	0.02727	FALSE	FALSE	FALSE	finn-b-M13_FIBROMYALGIA	11	128439889	0.1634	NA	0.0864391	Fibromyalgia	Fibromyalgia	Fibromyalgia || ||	TRUE	igd	NA	NA	NA	NA	NA	NA	NA	GCST90200258	2-hydroxy-4-(methylthio)butanoic acid levels	11	128569994	0.0385756	1.44355e-06	8255	TRUE	reported	textfile	2	TRUE
rs62045233	A	C	A	C	-0.136479	0.1716	0.0637523	0.05208	FALSE	FALSE	FALSE	finn-b-M13_FIBROMYALGIA	15	56285625	0.1192	NA	0.1501	Fibromyalgia	Fibromyalgia	Fibromyalgia || ||	TRUE	igd	NA	NA	NA	NA	NA	NA	NA	GCST90200258	2-hydroxy-4-(methylthio)butanoic acid levels	15	55993427	0.0307356	8.97816e-06	8255	TRUE	reported	textfile	2	TRUE
rs6425192	C	T	C	T	-0.121753	-0.0127	0.320929	0.2936	FALSE	FALSE	FALSE	finn-b-M13_FIBROMYALGIA	1	171327628	0.058	NA	0.8261	Fibromyalgia	Fibromyalgia	Fibromyalgia || ||	TRUE	igd	NA	NA	NA	NA	NA	NA	NA	GCST90200258	2-hydroxy-4-(methylthio)butanoic acid levels	1	171358489	0.0159879	2.63037e-14	8255	TRUE	reported	textfile	2	TRUE
rs66511710	G	A	G	A	-0.0685605	-0.0307	0.380703	0.3098	FALSE	FALSE	FALSE	finn-b-M13_FIBROMYALGIA	7	118172331	0.0574	NA	0.593401	Fibromyalgia	Fibromyalgia	Fibromyalgia || ||	TRUE	igd	NA	NA	NA	NA	NA	NA	NA	GCST90200258	2-hydroxy-4-(methylthio)butanoic acid levels	7	118532277	0.0154767	9.42741e-06	8255	TRUE	reported	textfile	2	TRUE
rs75703698	C	T	C	T	0.274488	-0.0677	0.0160957	0.005854	FALSE	FALSE	FALSE	finn-b-M13_FIBROMYALGIA	6	62287093	0.3535	NA	0.8482	Fibromyalgia	Fibromyalgia	Fibromyalgia || ||	TRUE	igd	NA	NA	NA	NA	NA	NA	NA	GCST90200258	2-hydroxy-4-(methylthio)butanoic acid levels	6	61577188	0.0602033	5.13135e-06	8255	TRUE	reported	textfile	2	TRUE
rs9566434	G	T	G	T	0.586696	0.1016	0.0034558	0.05962	FALSE	FALSE	FALSE	finn-b-M13_FIBROMYALGIA	13	40013319	0.1121	NA	0.3649	Fibromyalgia	Fibromyalgia	Fibromyalgia || ||	TRUE	igd	NA	NA	NA	NA	NA	NA	NA	GCST90200258	2-hydroxy-4-(methylthio)butanoic acid levels	13	39439182	0.128145	4.68612e-06	8255	TRUE	reported	textfile	2	TRUE
rs10013439	A	G	A	G	-0.113268	0.009	0.119593	0.1494	FALSE	FALSE	FALSE	finn-b-M13_FIBROMYALGIA	4	22593492	0.0746	NA	0.9039	Fibromyalgia	Fibromyalgia	Fibromyalgia || ||	TRUE	igd	NA	NA	NA	NA	NA	NA	NA	GCST90200282	Picolinate levels	4	22591869	0.0255182	9.05026e-06	7051	TRUE	reported	textfile	2	TRUE
rs10165615	A	G	A	G	-0.0765678	0.0135	0.526882	0.5445	FALSE	FALSE	FALSE	finn-b-M13_FIBROMYALGIA	2	140562342	0.0533	NA	0.7995	Fibromyalgia	Fibromyalgia	Fibromyalgia || ||	TRUE	igd	NA	NA	NA	NA	NA	NA	NA	GCST90200282	Picolinate levels	2	139804773	0.0165386	3.66296e-06	7051	TRUE	reported	textfile	2	TRUE
rs1047891	A	C	A	C	-0.104752	0.0532	0.305733	0.3223	FALSE	FALSE	FALSE	finn-b-M13_FIBROMYALGIA	2	211540507	0.0566	NA	0.347	Fibromyalgia	Fibromyalgia	Fibromyalgia || ||	TRUE	igd	NA	NA	NA	NA	NA	NA	NA	GCST90200282	Picolinate levels	2	210675783	0.017993	5.82115e-09	7051	TRUE	reported	textfile	2	TRUE
rs116572752	A	G	A	G	-0.222458	0.0546	0.0305615	0.06047	FALSE	FALSE	FALSE	finn-b-M13_FIBROMYALGIA	2	223371334	0.1123	NA	0.6265	Fibromyalgia	Fibromyalgia	Fibromyalgia || ||	TRUE	igd	NA	NA	NA	NA	NA	NA	NA	GCST90200282	Picolinate levels	2	222506615	0.0476773	3.07255e-06	7051	TRUE	reported	textfile	2	TRUE
rs1170931	T	C	T	C	0.0799666	-0.1225	0.511189	0.5974	FALSE	FALSE	FALSE	finn-b-M13_FIBROMYALGIA	13	36806069	0.054	NA	0.0232702	Fibromyalgia	Fibromyalgia	Fibromyalgia || ||	TRUE	igd	NA	NA	NA	NA	NA	NA	NA	GCST90200282	Picolinate levels	13	36231932	0.0166158	1.48919e-06	7051	TRUE	reported	textfile	2	TRUE
rs118128689	C	T	C	T	0.444047	-0.1557	0.00704927	0.02041	FALSE	FALSE	FALSE	finn-b-M13_FIBROMYALGIA	16	20604855	0.1847	NA	0.3993	Fibromyalgia	Fibromyalgia	Fibromyalgia || ||	TRUE	igd	NA	NA	NA	NA	NA	NA	NA	GCST90200282	Picolinate levels	16	20593533	0.0991152	7.46035e-06	7051	TRUE	reported	textfile	2	TRUE
rs13184770	G	A	G	A	0.0754414	0.0006	0.514092	0.612	FALSE	FALSE	FALSE	finn-b-M13_FIBROMYALGIA	5	8223124	0.0545	NA	0.9912	Fibromyalgia	Fibromyalgia	Fibromyalgia || ||	TRUE	igd	NA	NA	NA	NA	NA	NA	NA	GCST90200282	Picolinate levels	5	8223011	0.016819	7.27516e-06	7051	TRUE	reported	textfile	2	TRUE
rs148152439	A	G	A	G	-0.238828	-0.0958	0.0260684	0.0114	FALSE	FALSE	FALSE	finn-b-M13_FIBROMYALGIA	10	124220567	0.2463	NA	0.697199	Fibromyalgia	Fibromyalgia	Fibromyalgia || ||	TRUE	igd	NA	NA	NA	NA	NA	NA	NA	GCST90200282	Picolinate levels	10	122461051	0.0516818	3.8167e-06	7051	TRUE	reported	textfile	2	TRUE
rs164749	G	T	G	T	0.14552	-0.0107	0.476969	0.4184	FALSE	FALSE	FALSE	finn-b-M13_FIBROMYALGIA	16	89708224	0.0536	NA	0.8415	Fibromyalgia	Fibromyalgia	Fibromyalgia || ||	TRUE	igd	NA	NA	NA	NA	NA	NA	NA	GCST90200282	Picolinate levels	16	89641816	0.0164579	9.40488e-19	7051	TRUE	reported	textfile	2	TRUE
rs17557932	T	C	T	C	-0.094645	0.047	0.255649	0.3163	FALSE	FALSE	FALSE	finn-b-M13_FIBROMYALGIA	12	59820966	0.0569	NA	0.4086	Fibromyalgia	Fibromyalgia	Fibromyalgia || ||	TRUE	igd	NA	NA	NA	NA	NA	NA	NA	GCST90200282	Picolinate levels	12	59427185	0.0190838	7.06971e-07	7051	TRUE	reported	textfile	2	TRUE
rs185587631	C	G	C	G	0.352746	0.0231	0.0122229	0.0147	FALSE	TRUE	FALSE	finn-b-M13_FIBROMYALGIA	19	21897234	0.2175	NA	0.9153	Fibromyalgia	Fibromyalgia	Fibromyalgia || ||	TRUE	igd	NA	NA	NA	NA	NA	NA	NA	GCST90200282	Picolinate levels	19	21714432	0.0755844	3.05747e-06	7051	TRUE	reported	textfile	2	TRUE
rs3823118	A	G	A	G	0.149643	-0.0092	0.0742829	0.1195	FALSE	FALSE	FALSE	finn-b-M13_FIBROMYALGIA	6	73883238	0.0812	NA	0.9103	Fibromyalgia	Fibromyalgia	Fibromyalgia || ||	TRUE	igd	NA	NA	NA	NA	NA	NA	NA	GCST90200282	Picolinate levels	6	73173515	0.0316259	2.22698e-06	7051	TRUE	reported	textfile	2	TRUE
rs41286234	C	G	C	G	0.303256	0.0768	0.018653	0.01585	FALSE	TRUE	FALSE	finn-b-M13_FIBROMYALGIA	6	135239758	0.2119	NA	0.7171	Fibromyalgia	Fibromyalgia	Fibromyalgia || ||	TRUE	igd	NA	NA	NA	NA	NA	NA	NA	GCST90200282	Picolinate levels	6	134918620	0.0609158	6.41501e-07	7051	TRUE	reported	textfile	2	TRUE
rs4392119	C	T	C	T	0.250848	-0.1574	0.972514	0.9723	FALSE	FALSE	FALSE	finn-b-M13_FIBROMYALGIA	17	28565363	0.16	NA	0.3254	Fibromyalgia	Fibromyalgia	Fibromyalgia || ||	TRUE	igd	NA	NA	NA	NA	NA	NA	NA	GCST90200282	Picolinate levels	17	30238345	0.0503664	6.34331e-07	7051	TRUE	reported	textfile	2	TRUE
rs528053698	T	A	T	A	-0.156034	-0.0577	0.0592967	0.04791	FALSE	TRUE	FALSE	finn-b-M13_FIBROMYALGIA	2	161869135	0.1231	NA	0.639401	Fibromyalgia	Fibromyalgia	Fibromyalgia || ||	TRUE	igd	NA	NA	NA	NA	NA	NA	NA	GCST90200282	Picolinate levels	2	161012624	0.0351023	8.78463e-06	7051	TRUE	reported	textfile	2	TRUE
[truncated: 32,583 more rows]

## Sheet: Table S3
The result of Cochran’s IVW Q test
id.exposure	id.outcome	outcome	exposure	method	Q	Q_df	Q_pval
[truncated: 22 more rows]

## Sheet: Table S4
The result of MR-Egger regression intercept analysis
[truncated: 12 more rows]

[truncated: 7 more sheets: Table S5, Table S6, Table S7, Table S8, Table S9, Table S10, Table S11]
